# Supplementary material for: Convenient and flexible syntheses of gem-dimethyl carboxylic triggers via mono-selective β-C(sp3)–H arylation of pivalic acid with ortho-substituted aryl iodides
Source: Royal Society of Chemistry journal article supplement (doi:10.1039/d2qo00478j), 2022-01-01

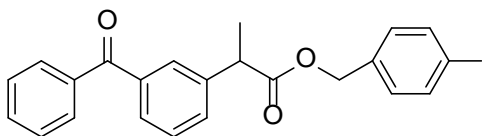

6-58

### Generic Display Report

#### Analysis Info

Analysis Name D:\Data\data\202111\swp\HYL-t\_1-E,2\_01\_20641.d  
Method pq-ms-pos-50-1000.m  
Sample Name HYL-t  
Comment

Acquisition Date 11/12/2021 1:08:53 PM

Operator BDAL@DE  
Instrument impact II

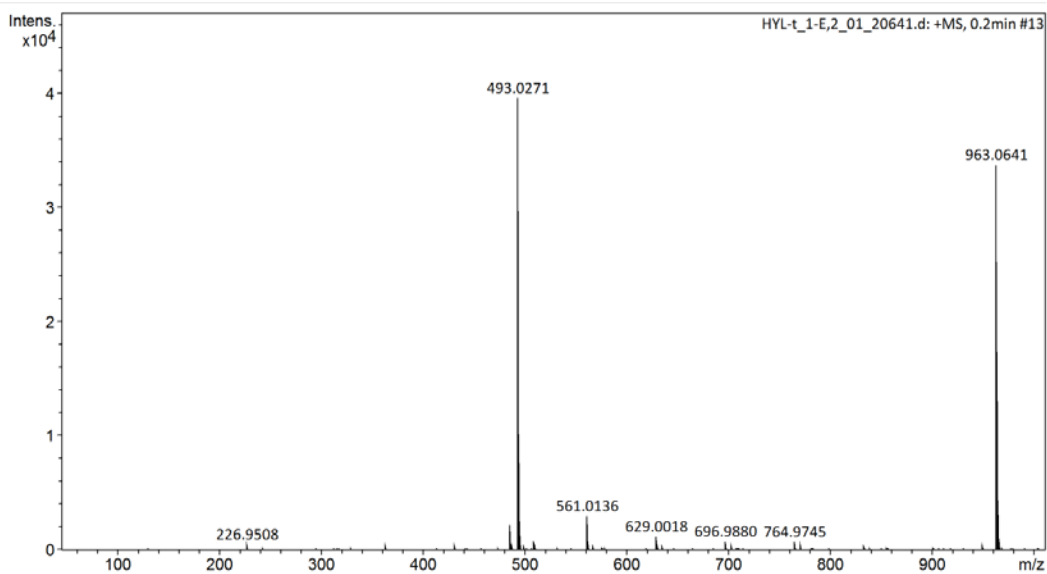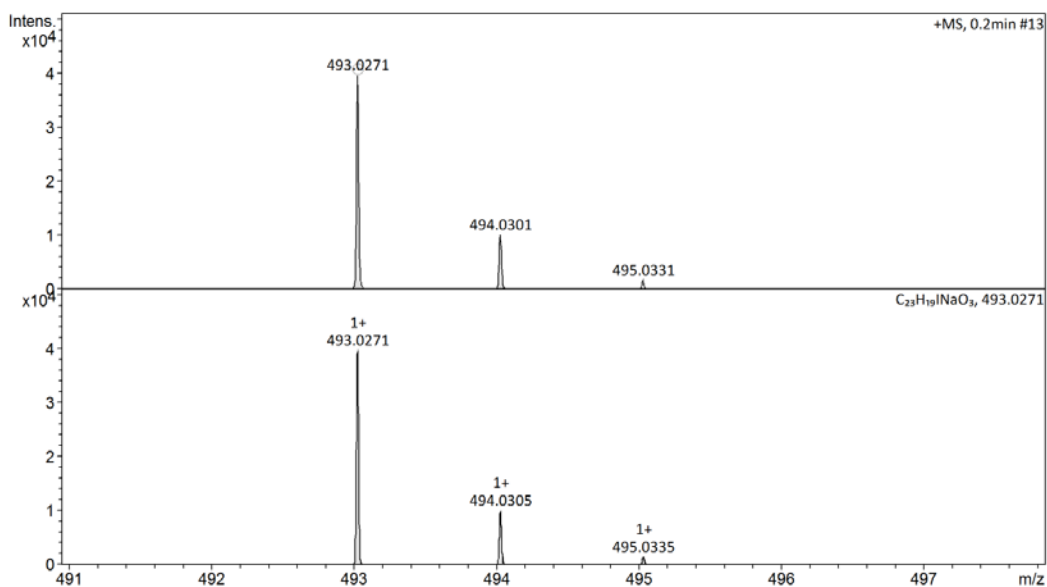

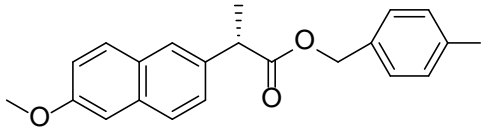

6-60

### Generic Display Report

**Analysis Info**

Analysis Name D:\Data\data\202111\swp\HYL-u\_1-E,3\_01\_20643.d  
Method pq-ms-pos-50-1000.m  
Sample Name HYL-u  
Comment

Acquisition Date 11/12/2021 1:15:38 PM

Operator BDAL@DE  
Instrument impact II

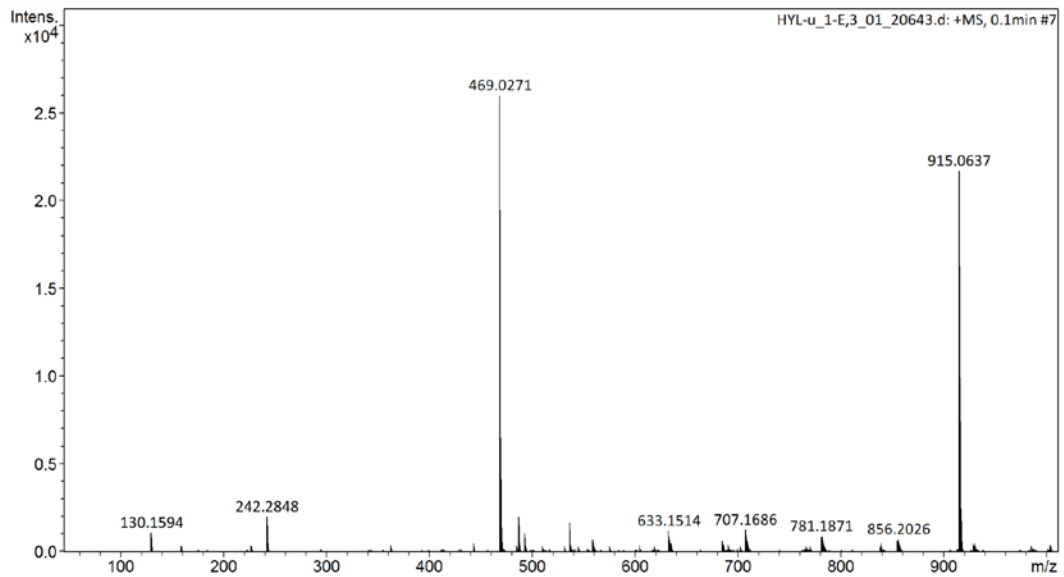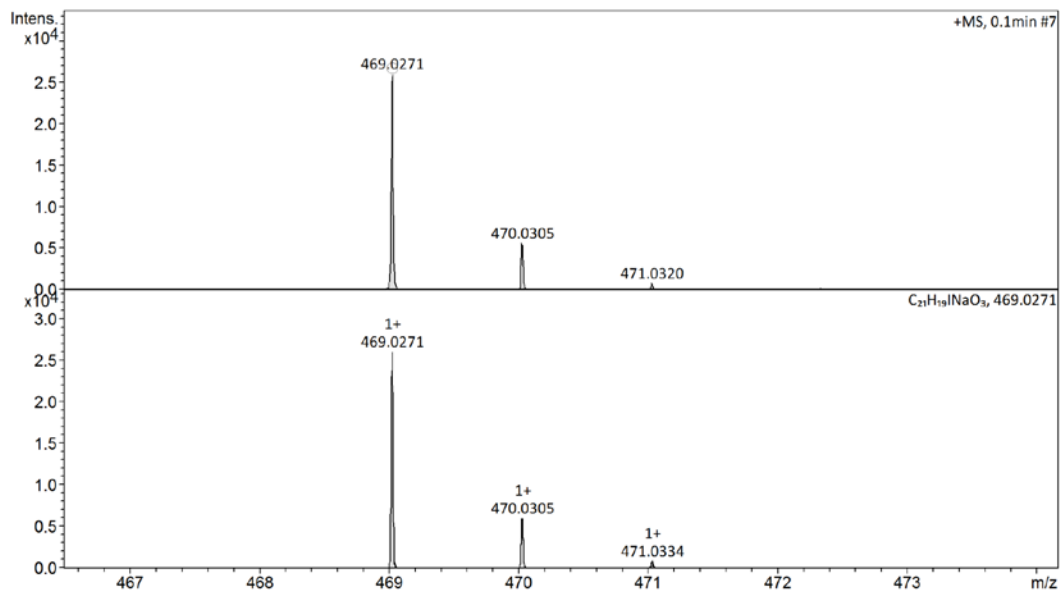

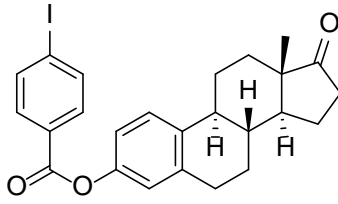

**6-61**

### Generic Display Report

**Analysis Info**

Analysis Name D:\Data\data\202111\swp\HYL-v\_1-E,4\_01\_20645.d  
 Method pq-ms-pos-50-1000.m  
 Sample Name HYL-v  
 Comment

Acquisition Date 11/12/2021 1:22:20 PM

Operator BDAL@DE  
 Instrument impact II

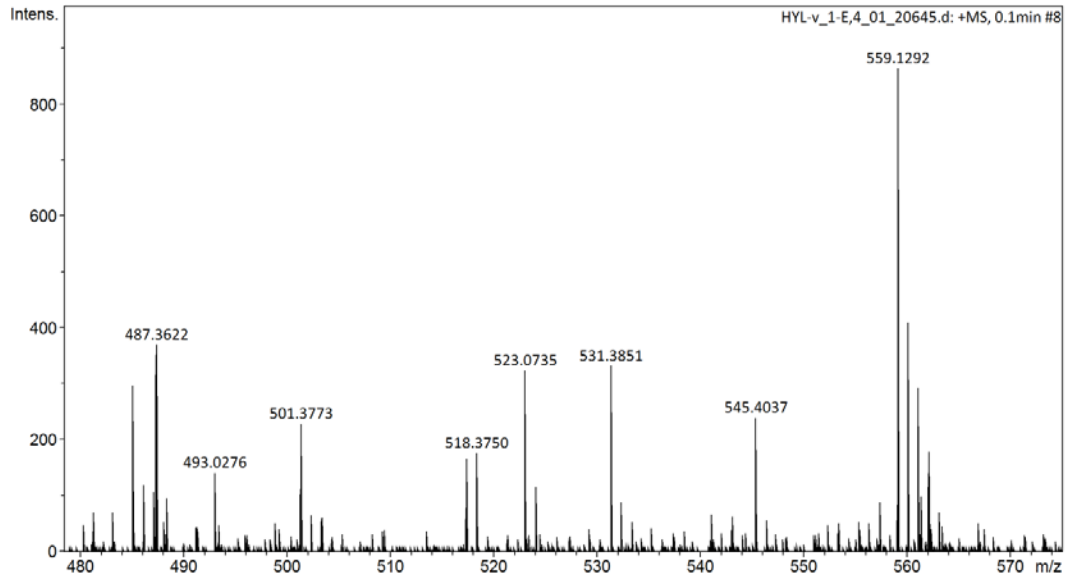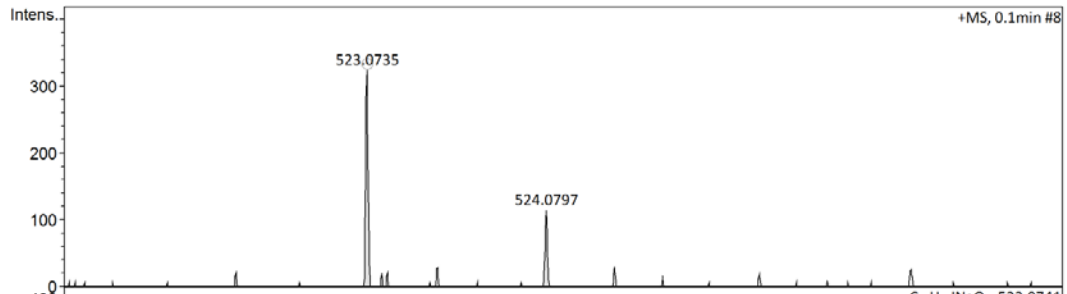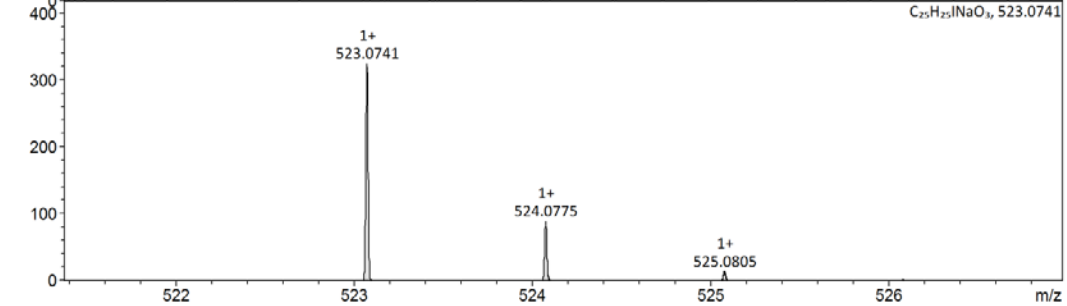

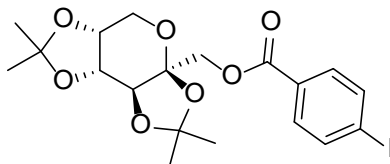

6-63

### Generic Display Report

**Analysis Info**

Analysis Name D:\Data\data\202111\swp\HYL-y\_1-E,7\_01\_20651.d  
Method pq-ms-pos-50-1000.m  
Sample Name HYL-y  
Comment

Acquisition Date 11/12/2021 1:42:33 PM

Operator BDAL@DE  
Instrument impact II

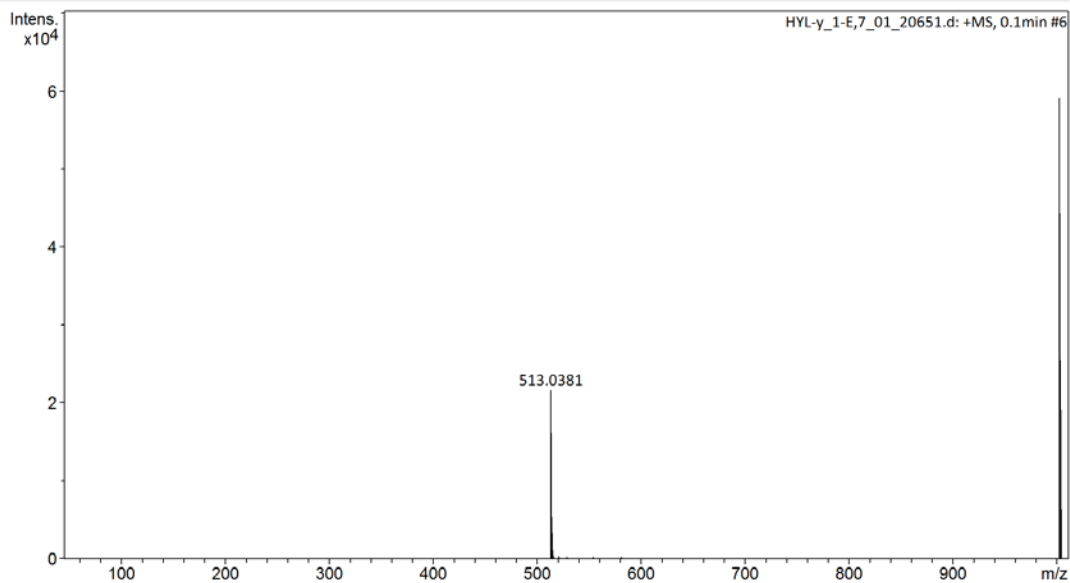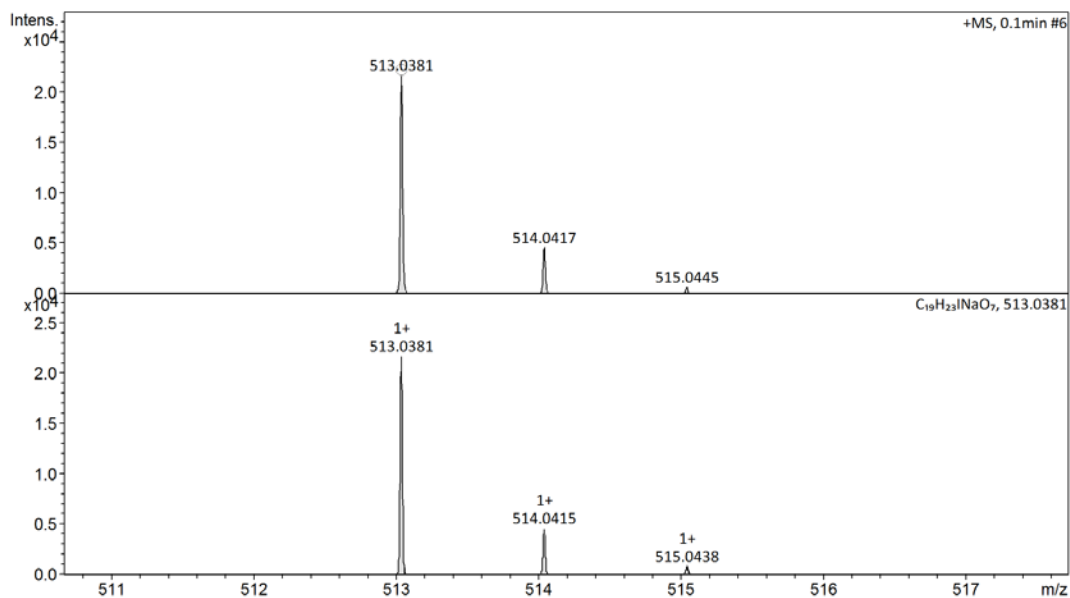

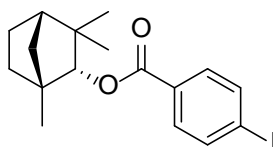

6-64

National Center for Organic Mass Spectrometry in Shanghai  
 Shanghai Institute of Organic Chemistry  
 Chinese Academy of Sciences  
 High Resolution MS DATA REPORT

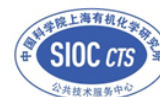

Instrument: Thermo Fisher Scientific LTQ FTICR-MS  
 Card Serial Number: D20220426  
 Sample Serial Number: HYL(W)  
 Operator: DONG Date: 2021/12/23  
 Operation Mode: DART POSITIVE  
 Elemental composition search on mass 385.0658

| m/z      | Theo. Mass | Delta (ppm) | RDB equiv. | Composition                                                                   |
|----------|------------|-------------|------------|-------------------------------------------------------------------------------|
| 385.0658 | 385.0657   | 0.15        | -4.5       | C <sub>9</sub> H <sub>23</sub> O <sub>2</sub> F <sub>5</sub> I                |
|          | 385.0657   | 0.17        | 19.0       | C <sub>22</sub> H <sub>9</sub> O <sub>2</sub> N <sub>3</sub> F <sub>2</sub>   |
|          | 385.0659   | -0.26       | 6.5        | C <sub>17</sub> H <sub>22</sub> O <sub>2</sub> I                              |
|          | 385.0657   | 0.26        | 3.0        | C <sub>12</sub> H <sub>21</sub> O <sub>2</sub> N <sub>3</sub> F I             |
|          | 385.0659   | -0.35       | 22.5       | C <sub>27</sub> H <sub>10</sub> O <sub>2</sub> F                              |
|          | 385.0648   | 2.62        | 26.5       | C <sub>30</sub> H <sub>9</sub> O                                              |
|          | 385.0668   | -2.71       | -1.0       | C <sub>9</sub> H <sub>22</sub> O <sub>3</sub> N <sub>3</sub> F <sub>2</sub> I |
|          | 385.0669   | -2.80       | 15.0       | C <sub>19</sub> H <sub>10</sub> O <sub>3</sub> N <sub>3</sub> F <sub>3</sub>  |
|          | 385.0646   | 3.03        | 15.5       | C <sub>22</sub> H <sub>10</sub> O F <sub>5</sub>                              |
|          | 385.0646   | 3.12        | -0.5       | C <sub>12</sub> H <sub>22</sub> O F <sub>4</sub> I                            |

D20220426 #20 RT: 0.3138 AV: 1 NL: 3.12E6  
 T: FTMS + p NSI Full ms [50.00-800.00]

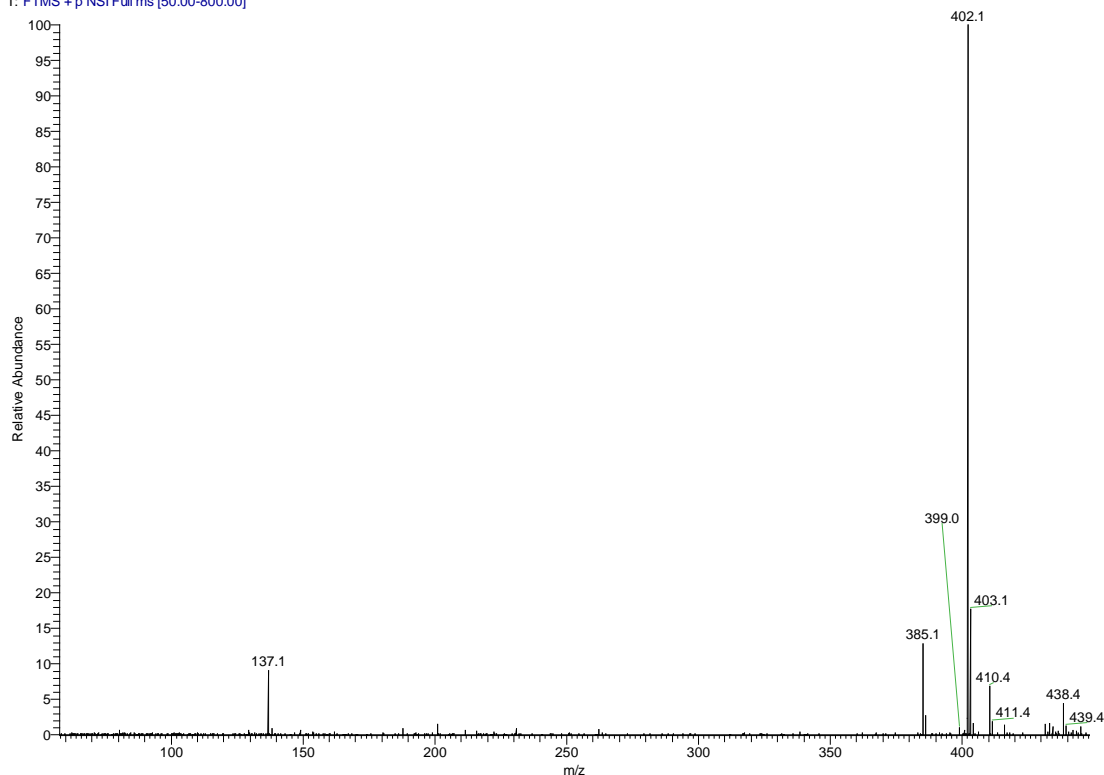

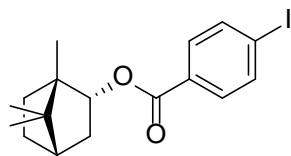

6-65

## Generic Display Report

### Analysis Info

Analysis Name D:\Data\data\202111\swp\HYL-x\_1-E,6\_01\_20649.d  
Method pq-ms-pos-50-1000.m  
Sample Name HYL-x  
Comment

Acquisition Date 11/12/2021 1:35:49 PM

Operator BDAL@DE  
Instrument impact II

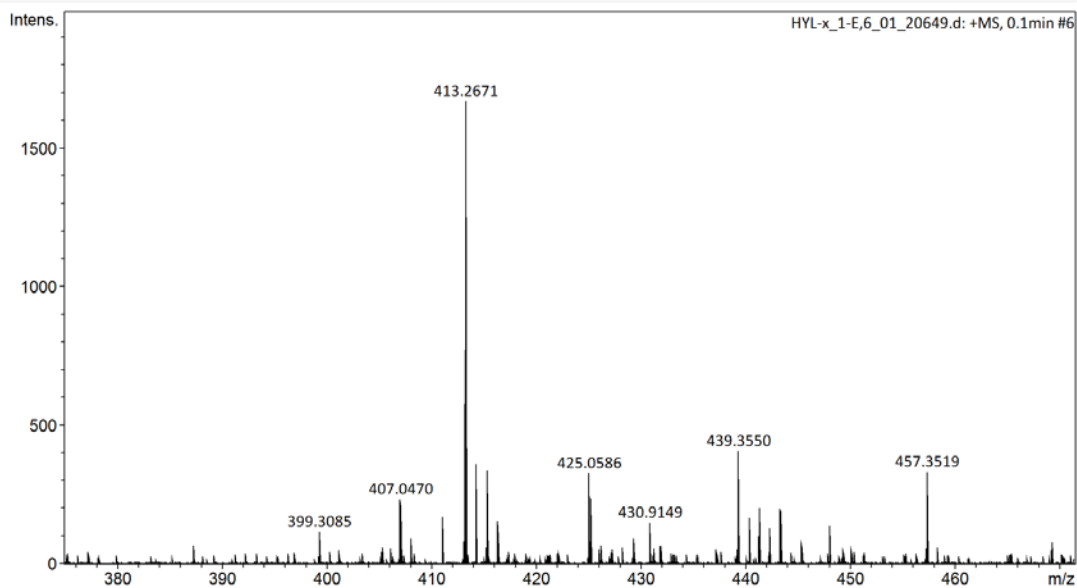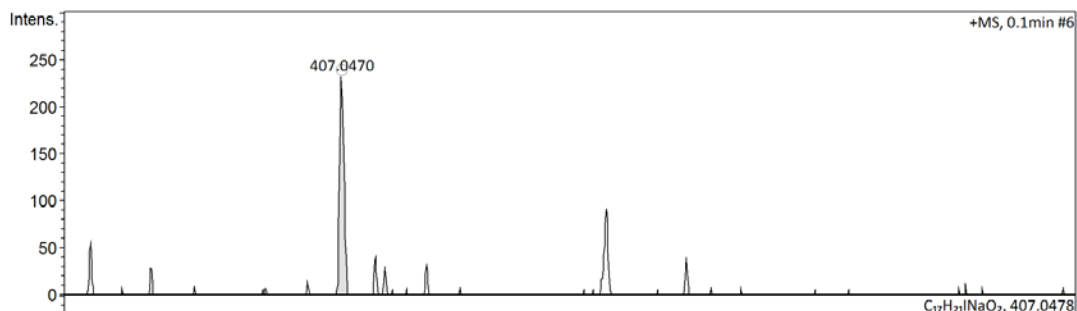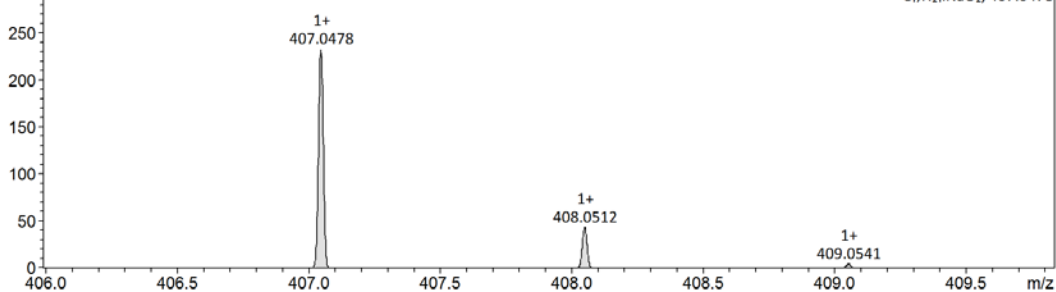

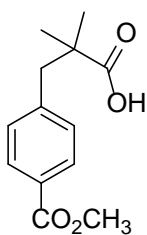

7-1

## Generic Display Report

### Analysis Info

Analysis Name D:\Data\data\202106\swp\HYL-1\_1-A,2\_01\_17209.d  
 Method pq-ms-neg-50-1000.m  
 Sample Name HYL-1  
 Comment

Acquisition Date 6/16/2021 8:36:15 AM

Operator BDAL@DE  
 Instrument impact II

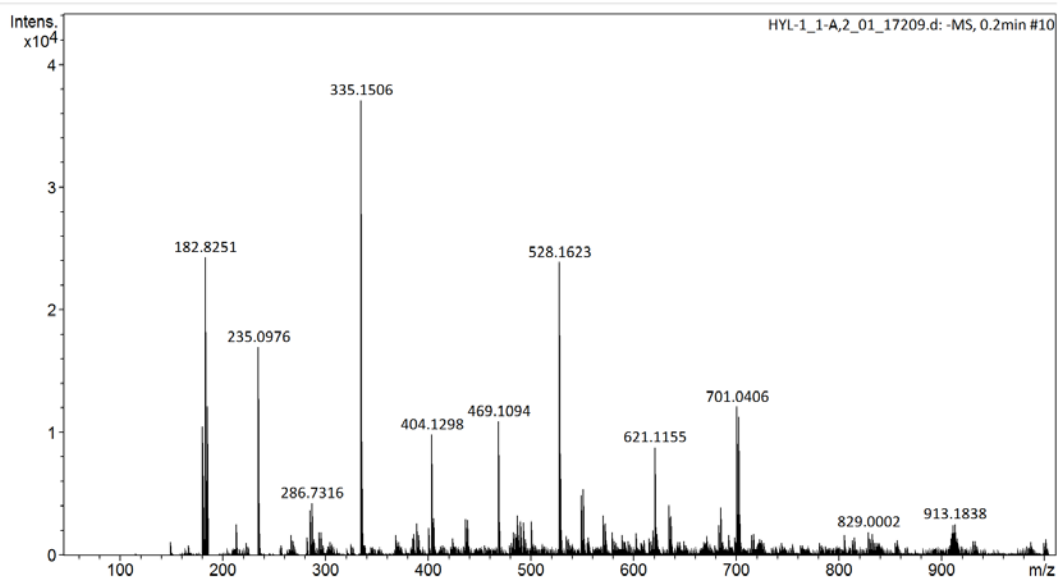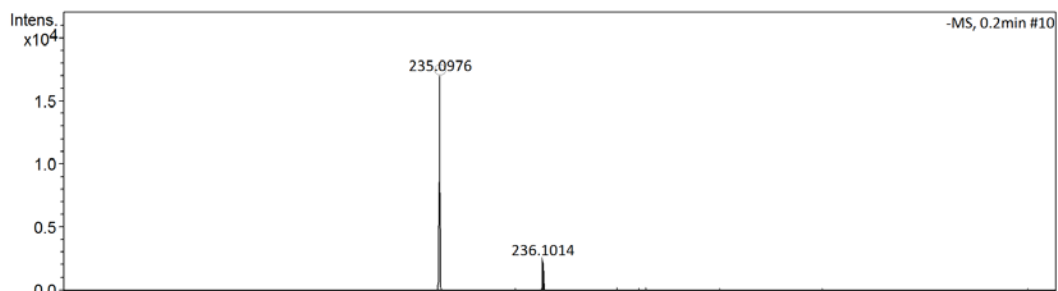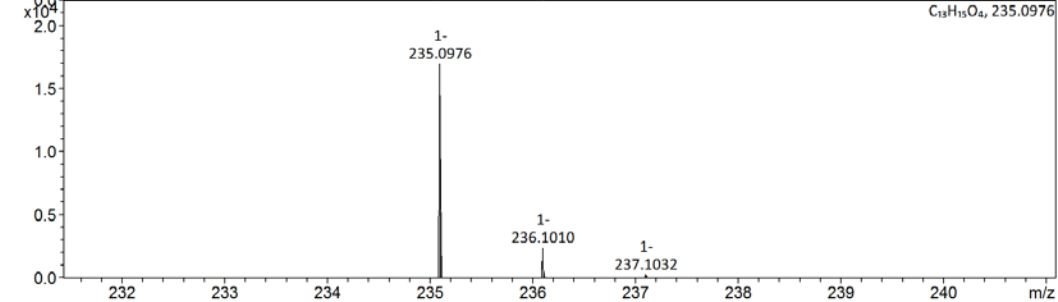

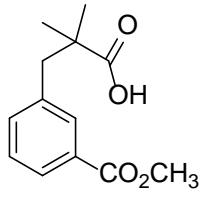

7-2

## Generic Display Report

### Analysis Info

Analysis Name D:\Data\data\202106\swp\HYL-15\_1-B,3\_01\_17227.d  
Method pq-ms-neg-50-1000.m  
Sample Name HYL-15  
Comment

Acquisition Date 6/16/2021 9:40:12 AM

Operator BDAL@DE  
Instrument impact II

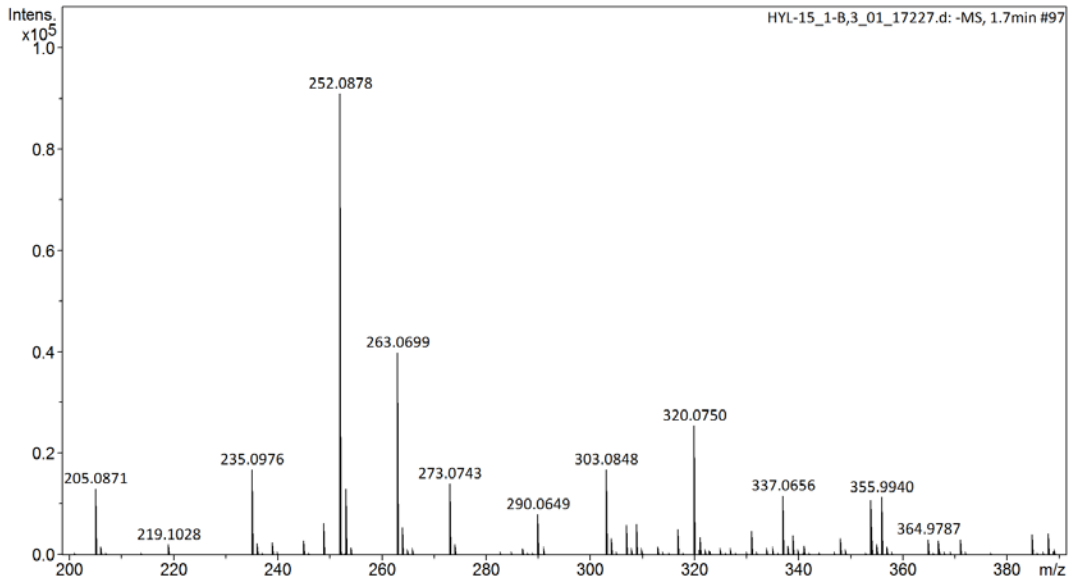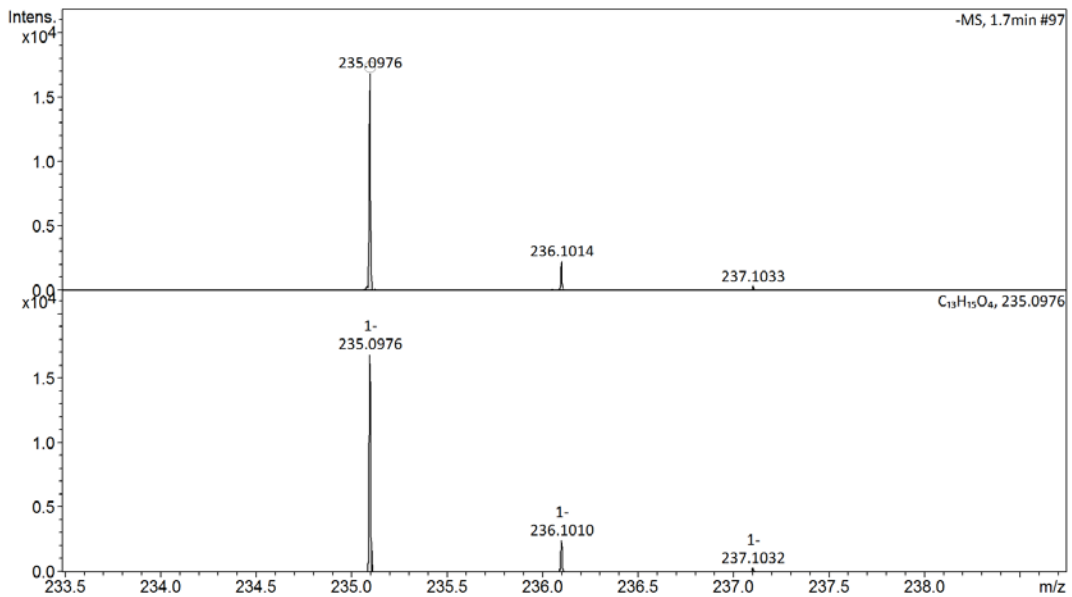



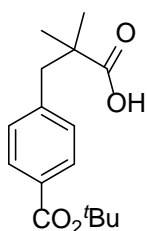

7-5

## Generic Display Report

### Analysis Info

Analysis Name D:\Data\data\202106\swp\HYL-45\_1-E,1\_01\_17274.d  
 Method pq-ms-neg-50-1000.m  
 Sample Name HYL-45  
 Comment

Acquisition Date 6/16/2021 2:40:51 PM

Operator BDAL@DE  
 Instrument impact II

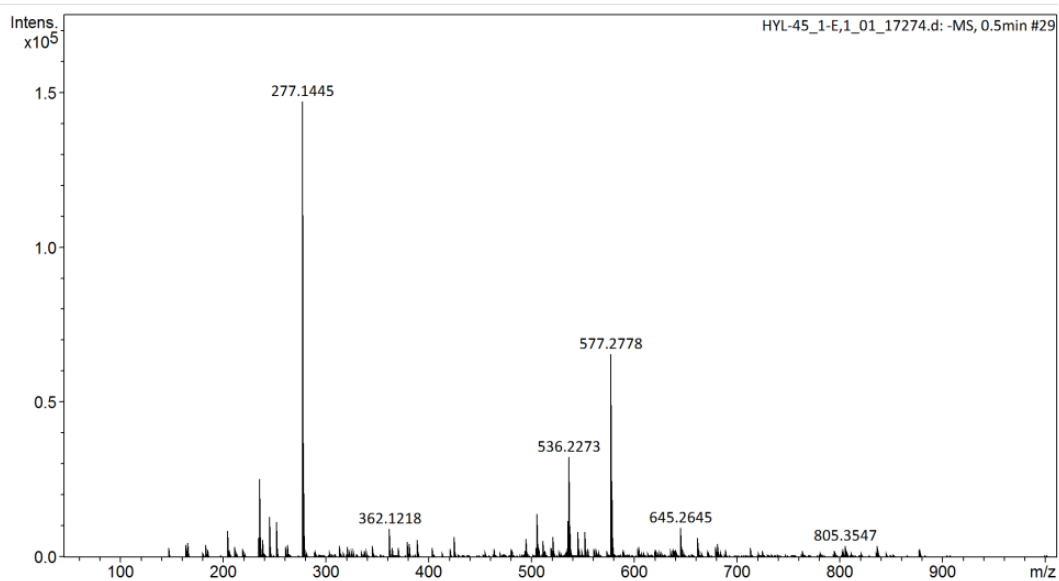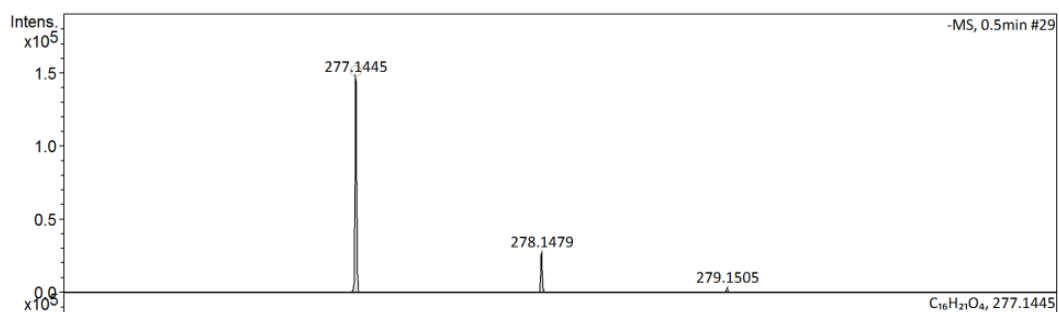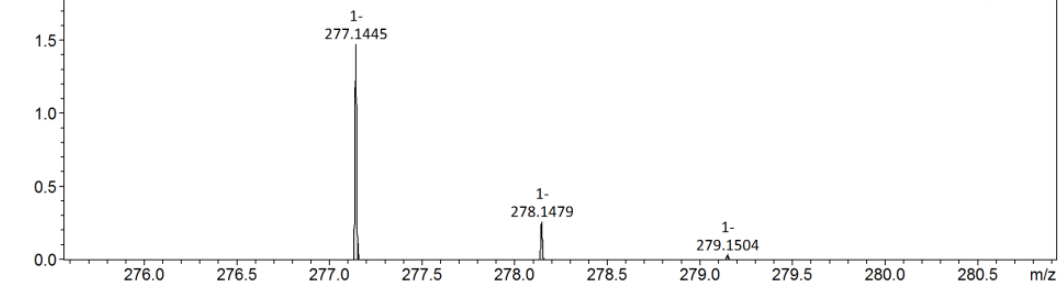

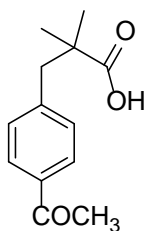

7-6

### Generic Display Report

**Analysis Info**

Analysis Name D:\Data\data\202106\swp\HYL-2\_1-A,3\_01\_17211.d  
 Method pq-ms-neg-50-1000.m  
 Sample Name HYL-2  
 Comment

Acquisition Date 6/16/2021 8:44:14 AM

Operator BDAL@DE  
 Instrument impact II

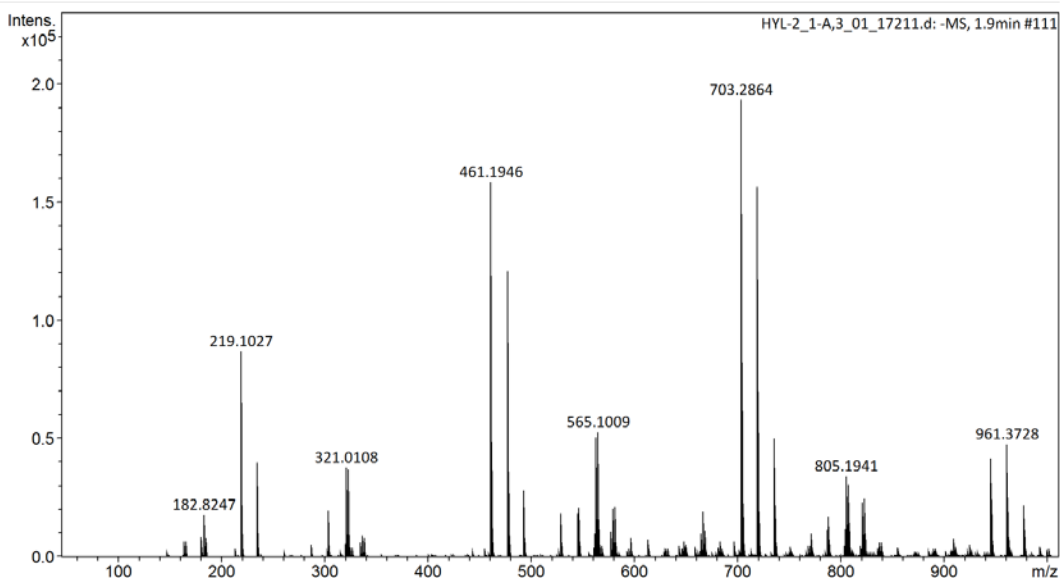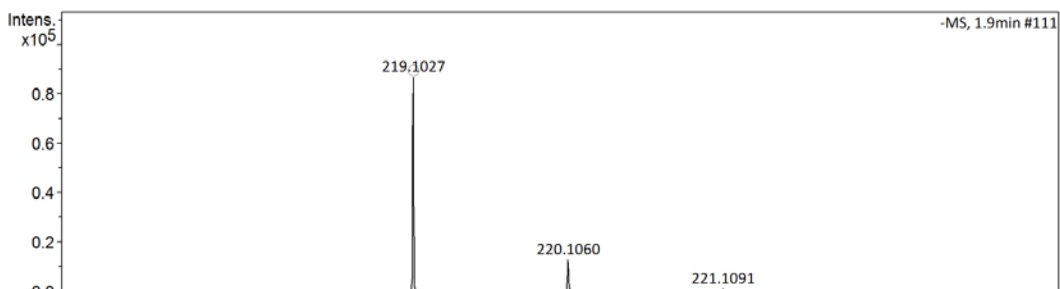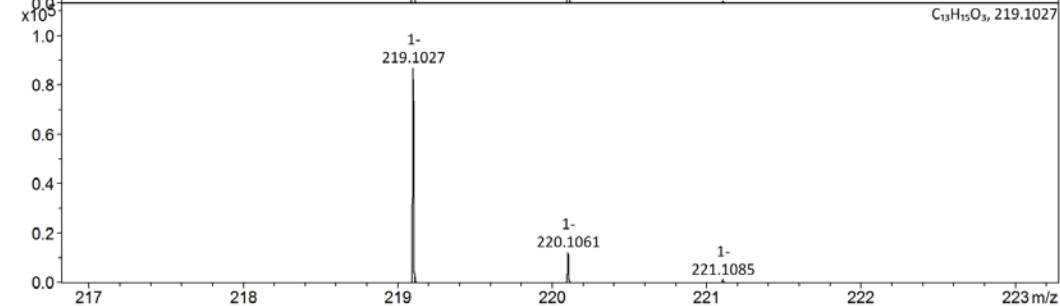

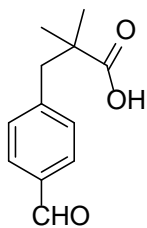

7-8

### Generic Display Report

**Analysis Info**

Analysis Name D:\Data\data\202106\swp\HYL-6\_1-A,5\_01\_17215.d  
Method pq-ms-neg-50-1000.m  
Sample Name HYL-6  
Comment

Acquisition Date 6/16/2021 8:57:55 AM

Operator BDAL@DE  
Instrument impact II

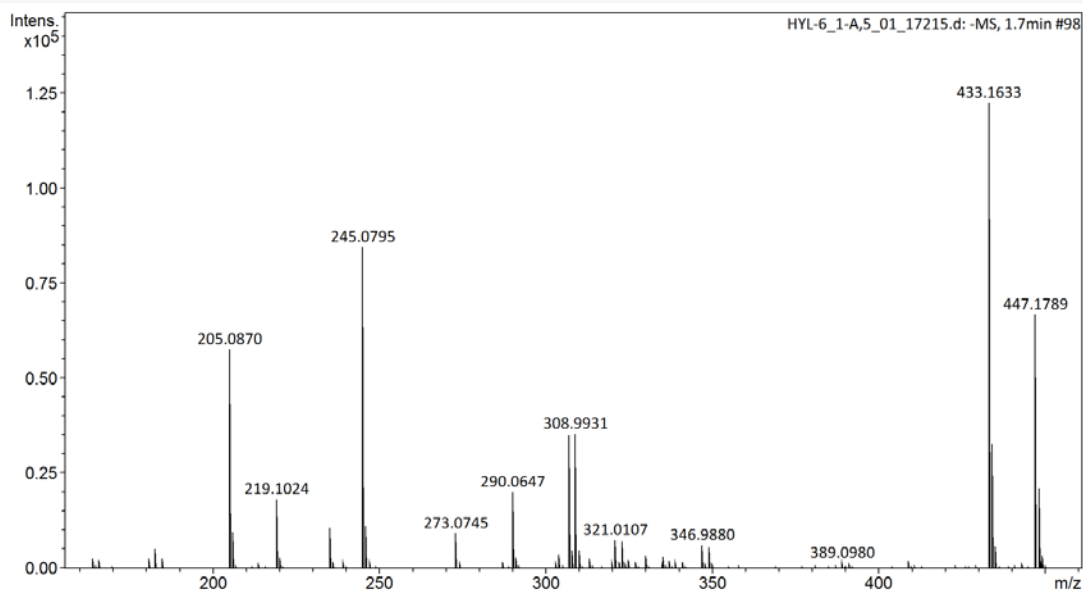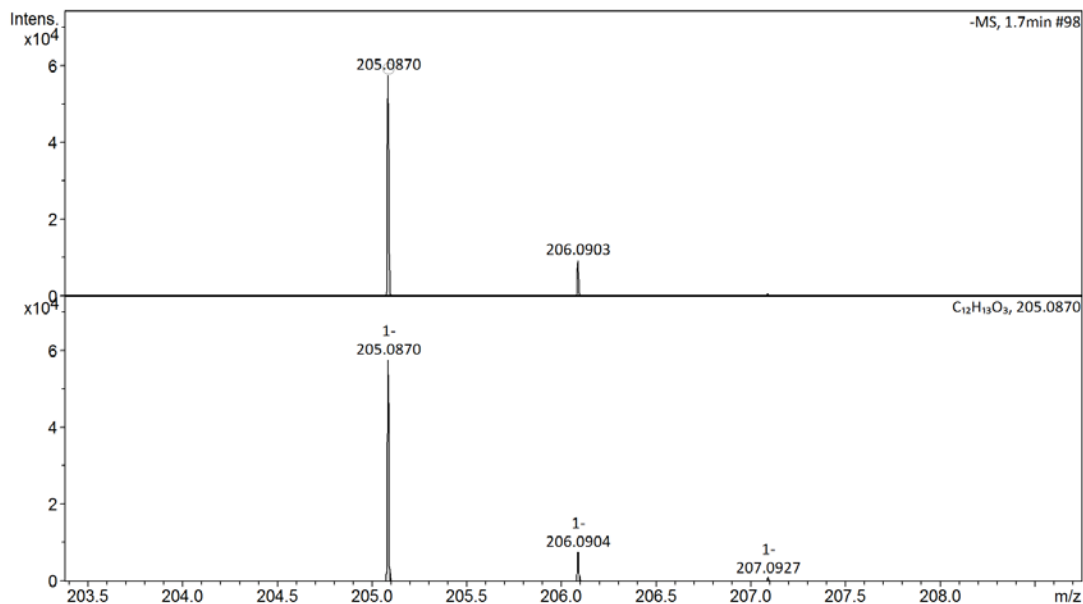

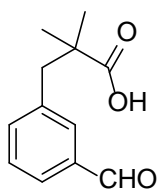

7-9

## Generic Display Report

### Analysis Info

Analysis Name D:\Data\data\202106\swp\HYL-7\_1-A,6\_01\_17217.d  
 Method pq-ms-neg-50-1000.m  
 Sample Name HYL-7  
 Comment

Acquisition Date 6/16/2021 9:04:39 AM

Operator BDAL@DE  
 Instrument impact II

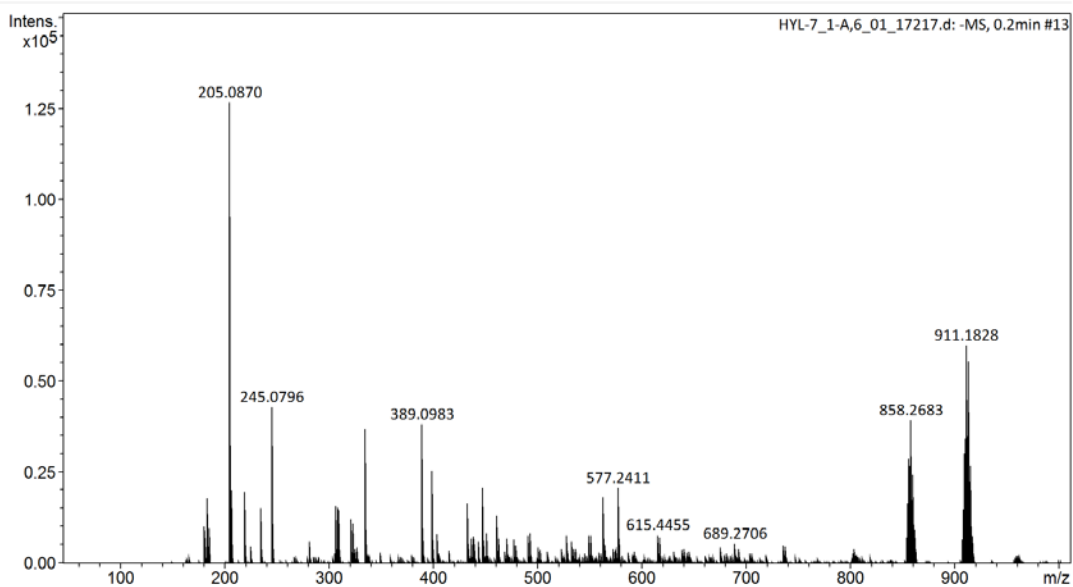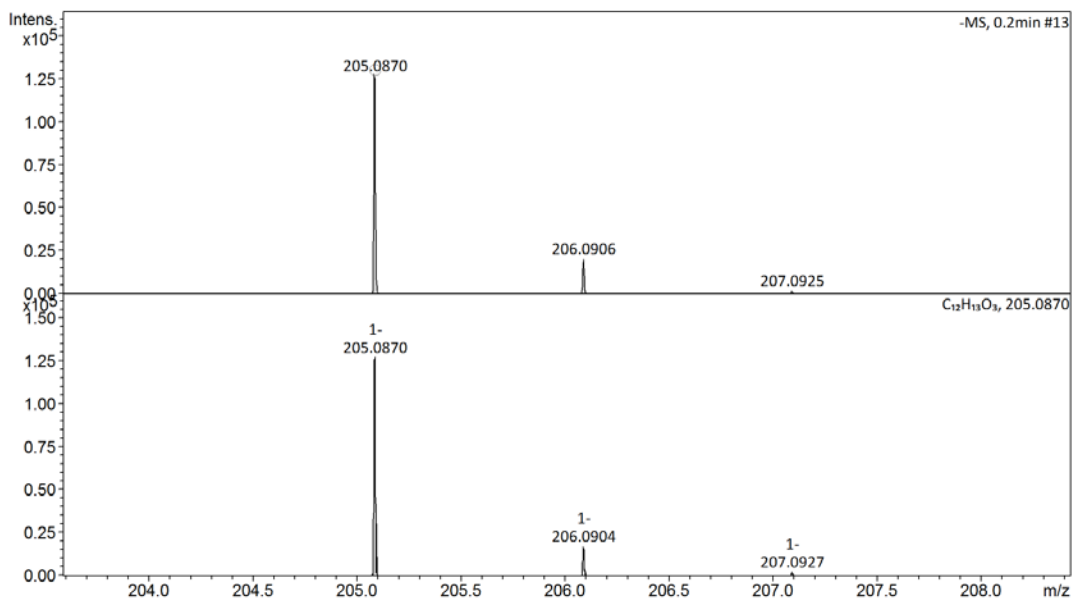

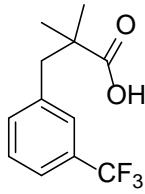

7-13

## Generic Display Report

### Analysis Info

Analysis Name D:\Data\data\202106\swp\HYL-5\_1-A,4\_01\_17213.d  
 Method pq-ms-neg-50-1000.m  
 Sample Name HYL-5  
 Comment

Acquisition Date 6/16/2021 8:51:12 AM

Operator BDAL@DE  
 Instrument impact II

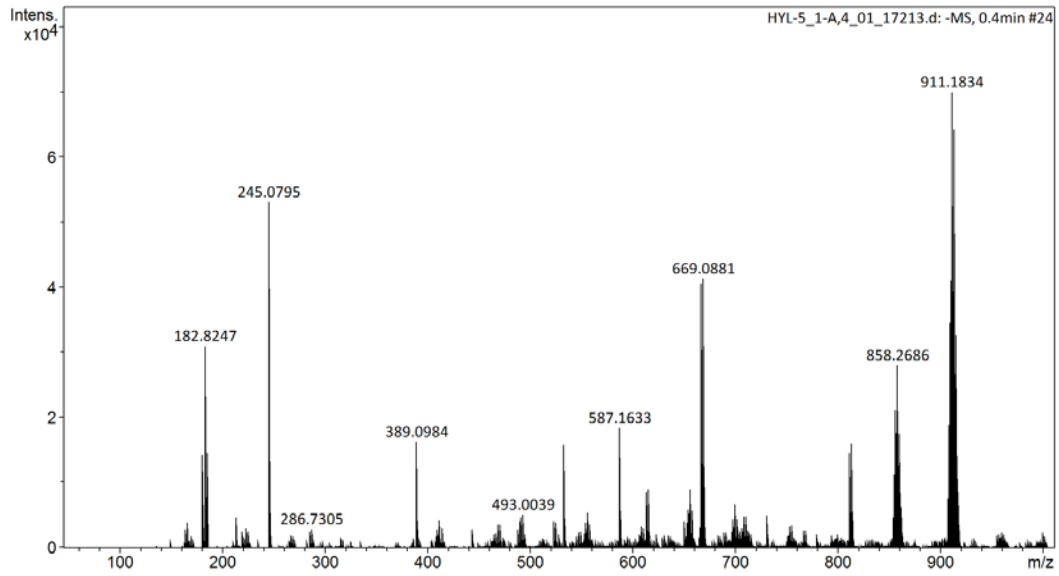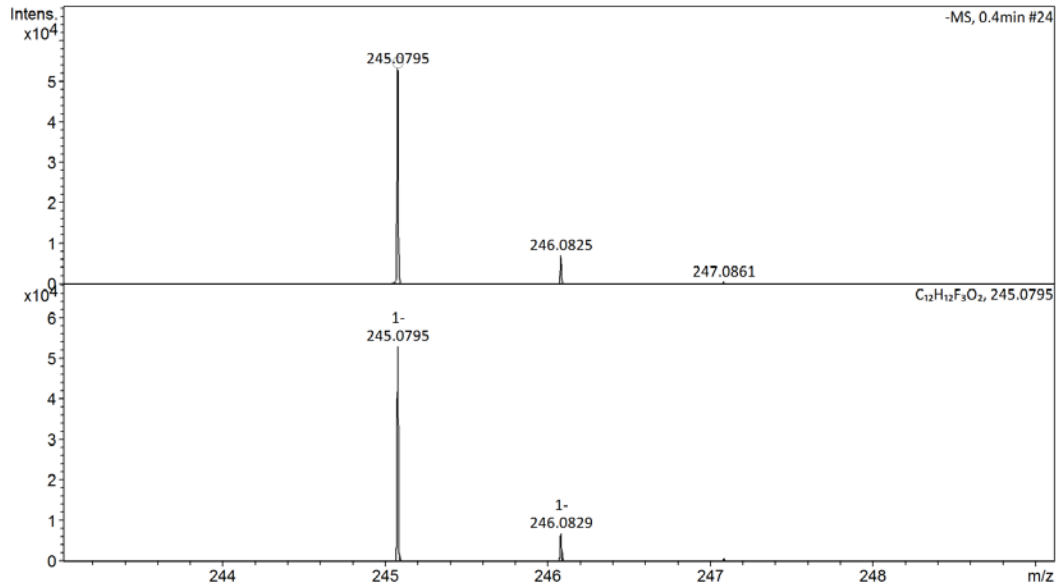

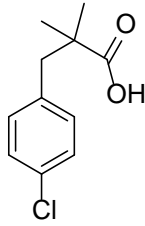

7-15

### Generic Display Report

**Analysis Info**

Analysis Name D:\Data\data\202106\swp\HYL-22\_1-B,8\_01\_17237.d  
Method pq-ms-neg-50-1000.m  
Sample Name HYL-22  
Comment

Acquisition Date 6/16/2021 10:13:52 AM

Operator BDAL@DE  
Instrument impact II

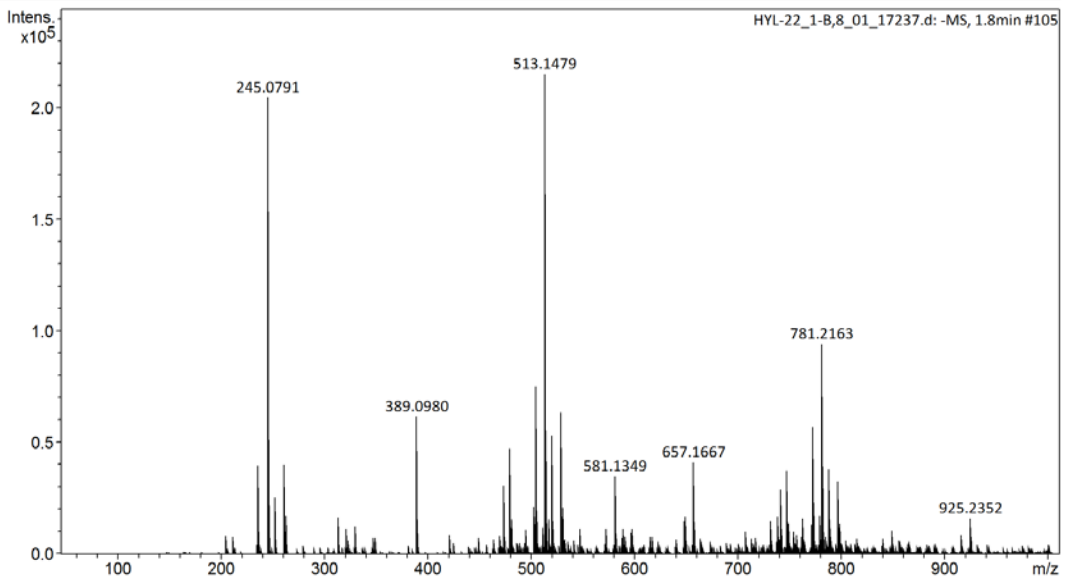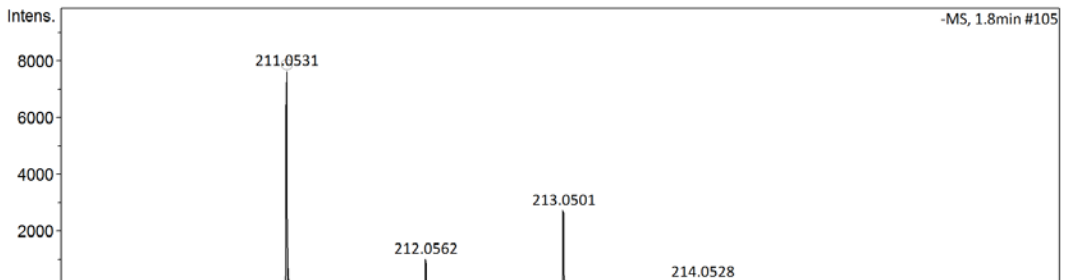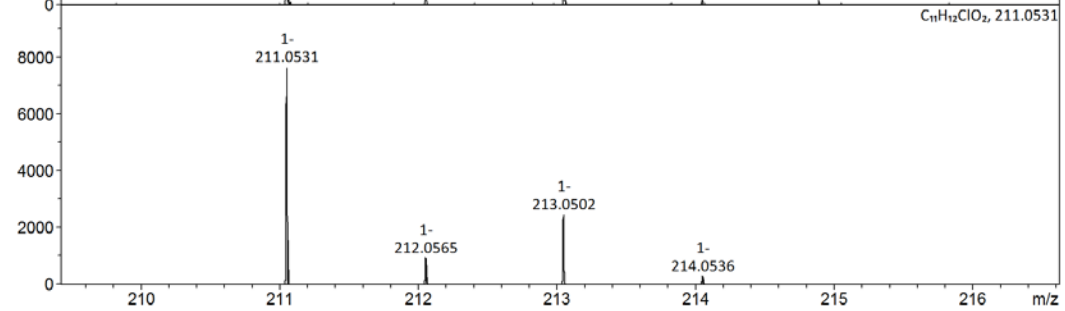

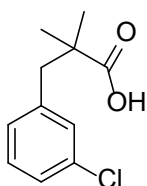

7-16

### Generic Display Report

**Analysis Info**

Analysis Name D:\Data\data\202106\swp\HYL-35\_1-C,8\_01\_17292.d  
 Method pq-ms-neg-50-1000.m  
 Sample Name HYL-35  
 Comment

Acquisition Date 6/16/2021 3:48:03 PM  
 Operator BDAL@DE  
 Instrument impact II

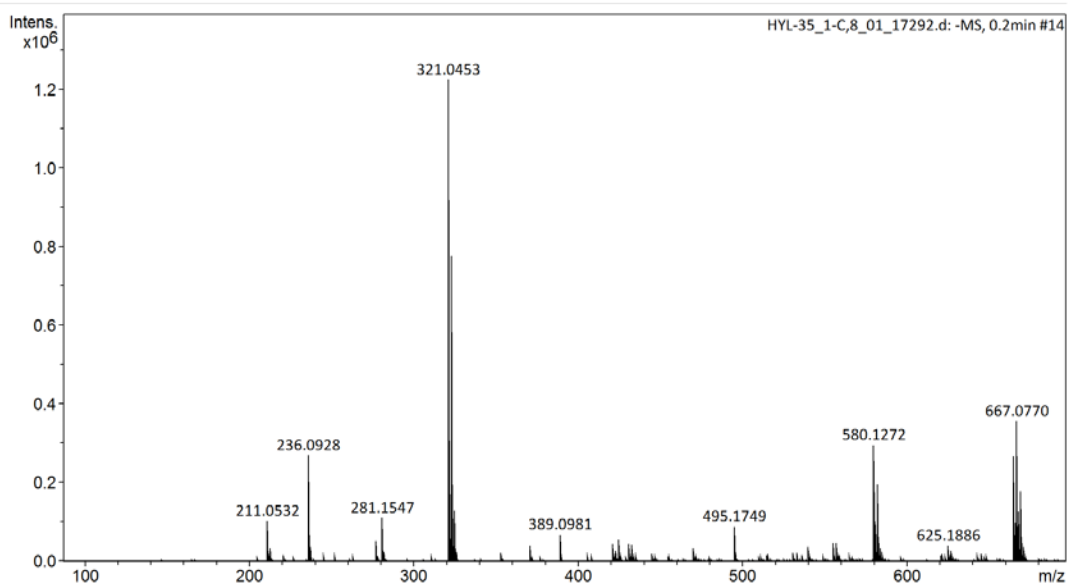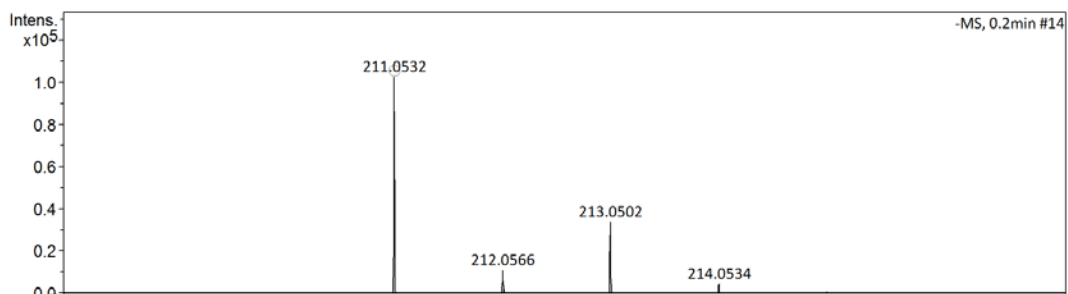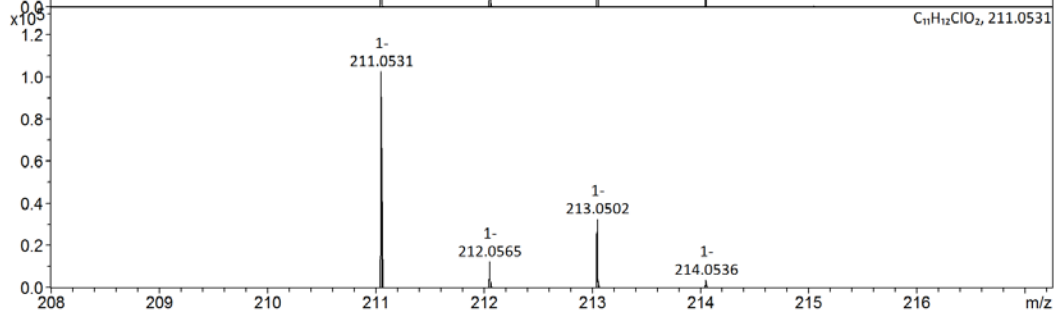

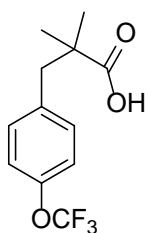

7-18

### Generic Display Report

**Analysis Info**

Analysis Name D:\Data\data\202106\swp\HYL-17\_1-B,4\_01\_17229.d  
 Method pq-ms-neg-50-1000.m  
 Sample Name HYL-17  
 Comment

Acquisition Date 6/16/2021 9:46:55 AM

Operator BDAL@DE  
 Instrument impact II

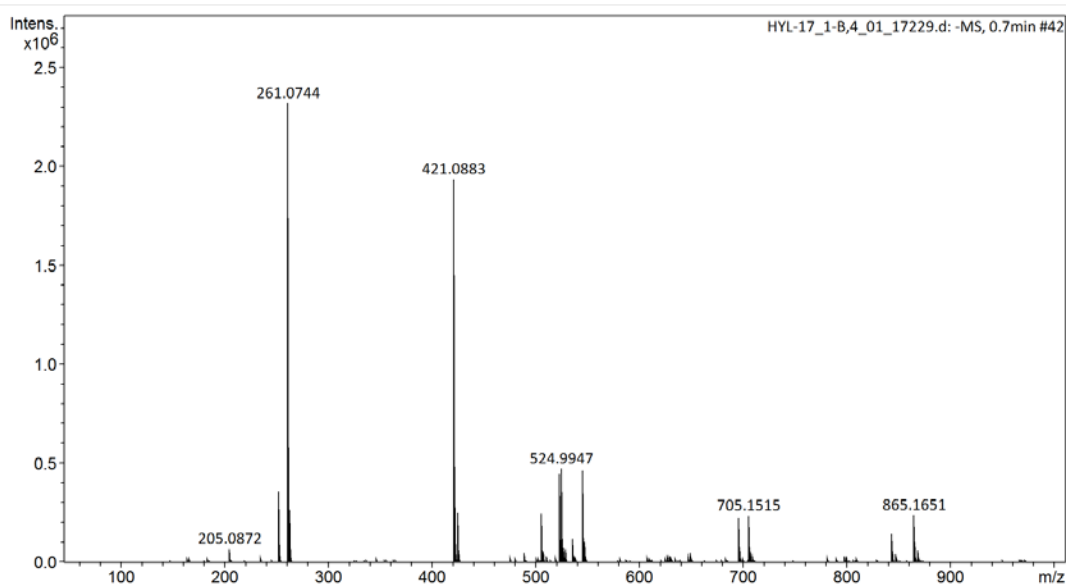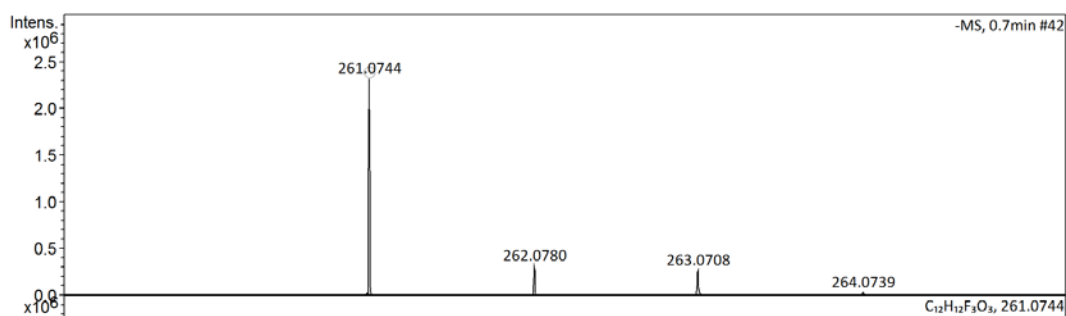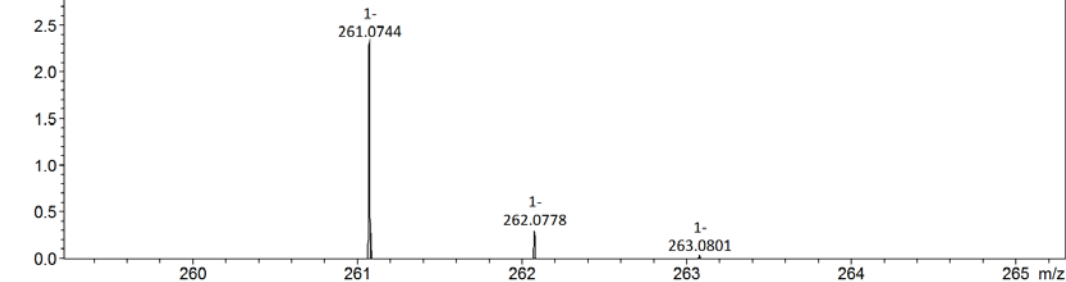



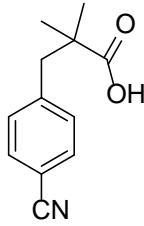

7-19

### Generic Display Report

**Analysis Info**

Analysis Name D:\Data\data\202107\swp\HYL48\_1-F,3\_01\_18839.d  
Method pq-ms-neg-50-1000.m  
Sample Name HYL48  
Comment

Acquisition Date 7/28/2021 3:48:39 PM

Operator BDAL@DE  
Instrument impact II

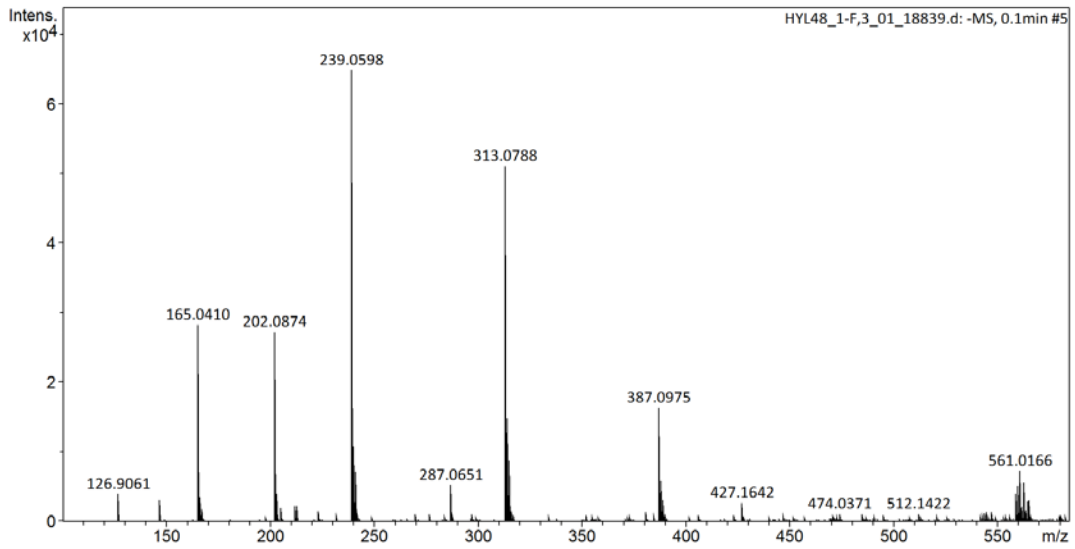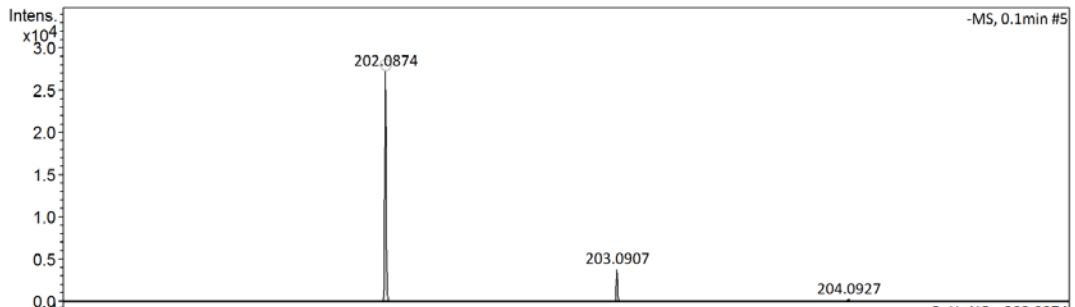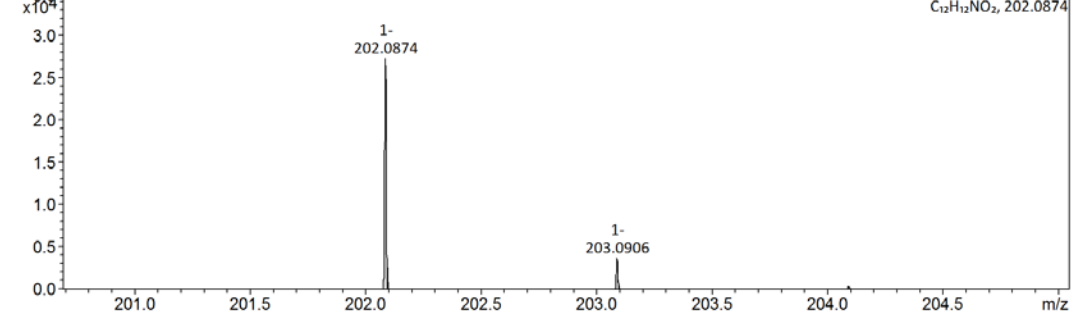

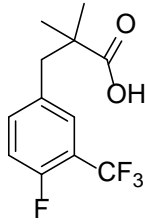

7-20

### Generic Display Report

**Analysis Info**

Analysis Name D:\Data\data\202106\swp\HYL-10\_1-A,7\_01\_17219.d  
Method pq-ms-neg-50-1000.m  
Sample Name HYL-10  
Comment

Acquisition Date 6/16/2021 9:12:17 AM

Operator BDAL@DE  
Instrument impact II

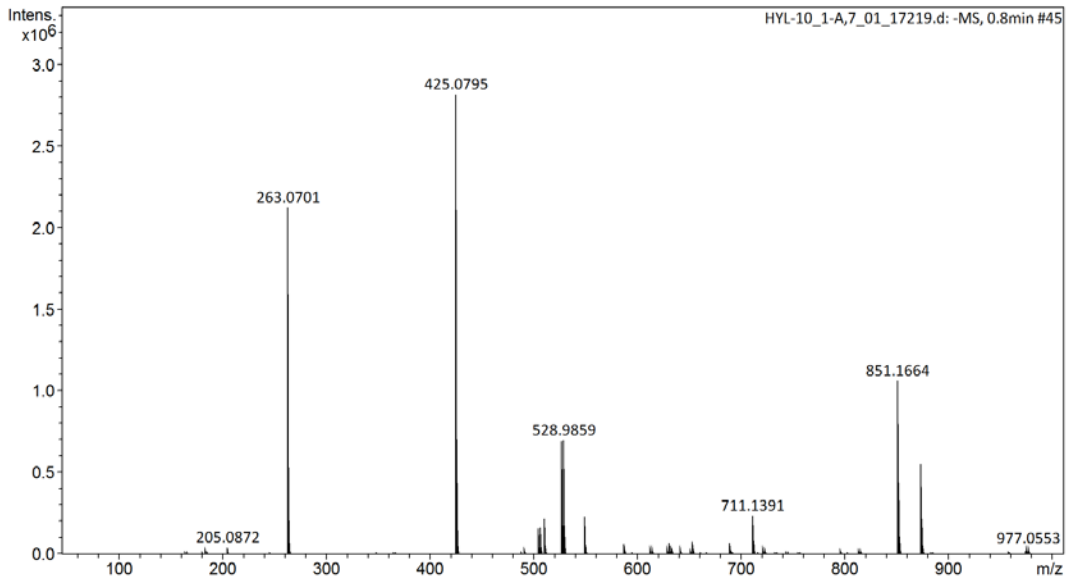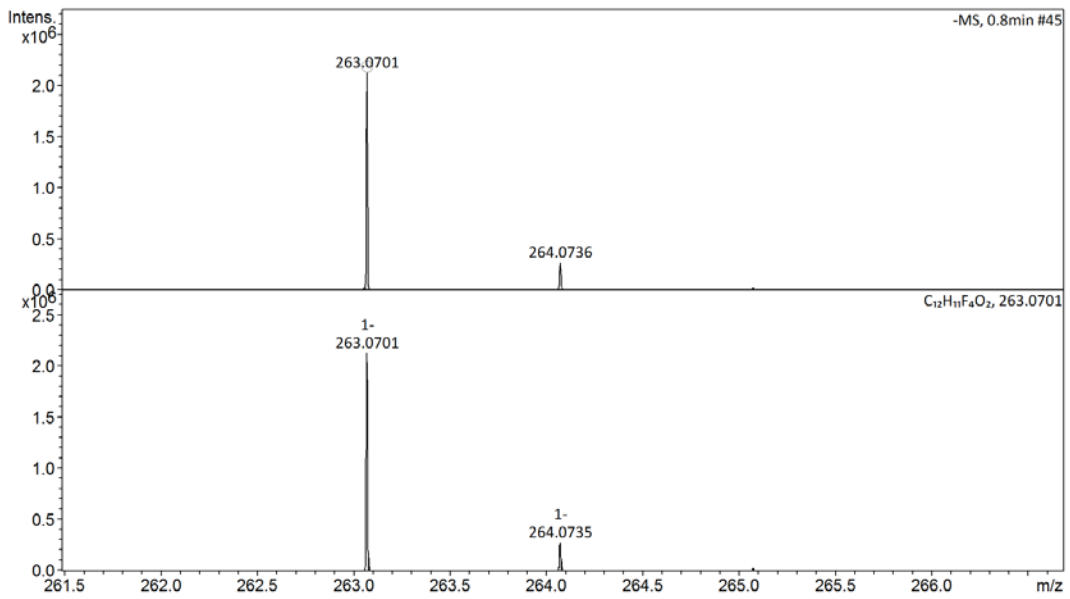

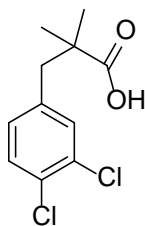

7-22

## Generic Display Report

### Analysis Info

Analysis Name D:\Data\data\202106\swp\HYL-36\_1-D,1\_01\_17294.d  
 Method pq-ms-neg-50-1000.m  
 Sample Name HYL-36  
 Comment

Acquisition Date 6/16/2021 3:55:17 PM

Operator BDAL@DE  
 Instrument impact II

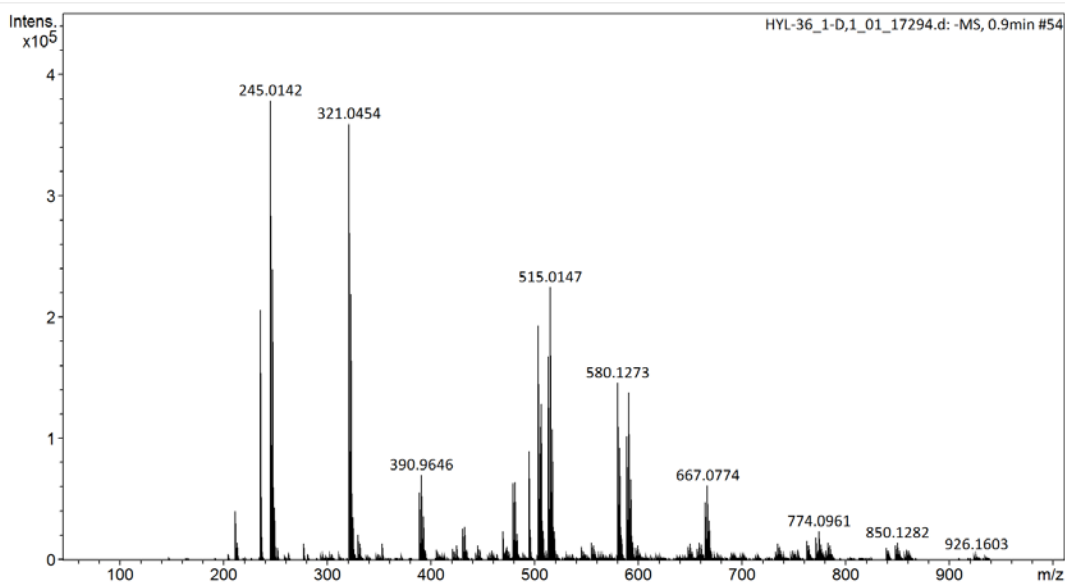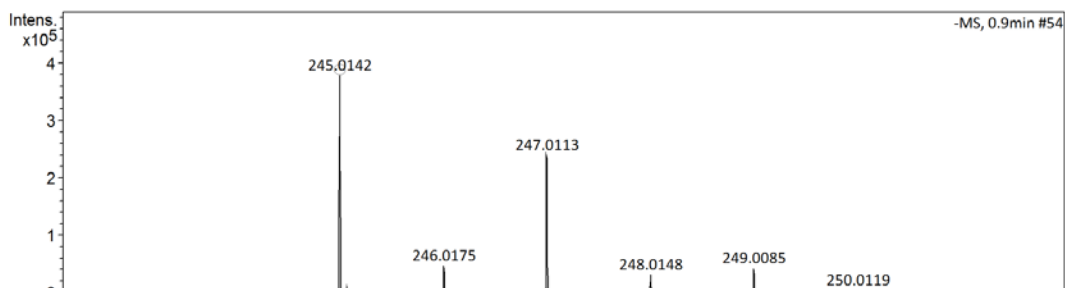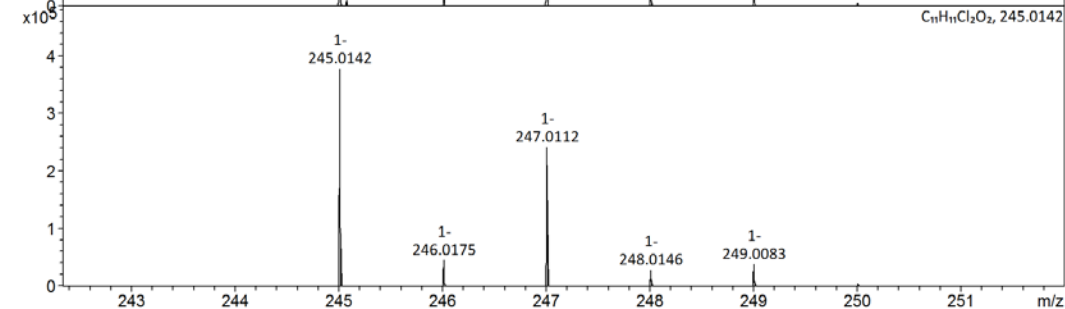

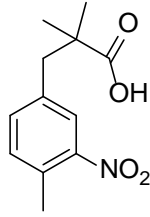

7-23

### Generic Display Report

**Analysis Info**

Analysis Name D:\Data\data\202106\swp\HYL-18\_1-B,5\_01\_17231.d  
 Method pq-ms-neg-50-1000.m  
 Sample Name HYL-18  
 Comment

Acquisition Date 6/16/2021 9:53:40 AM

Operator BDAL@DE  
 Instrument impact II

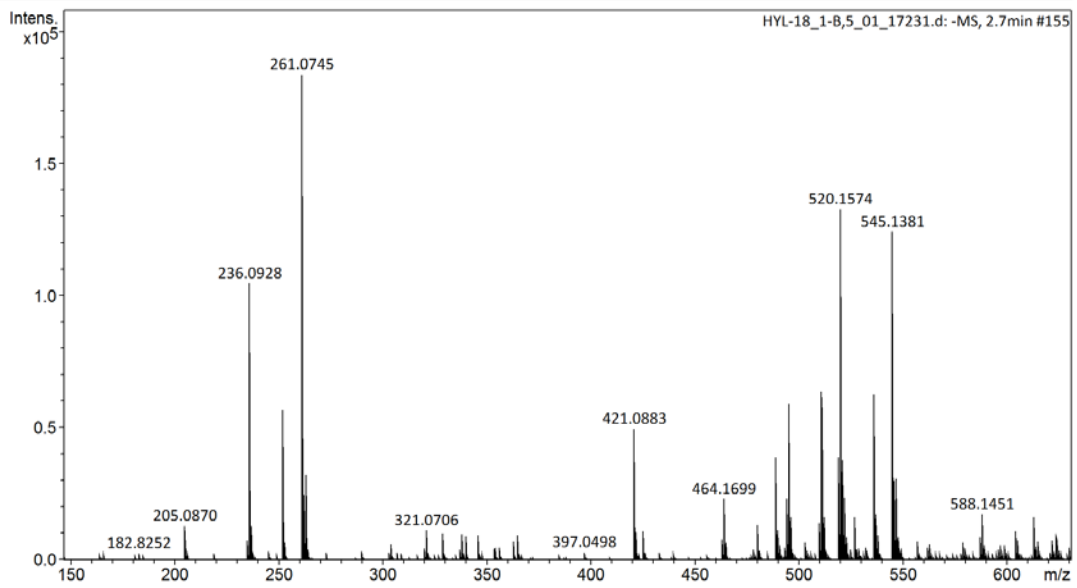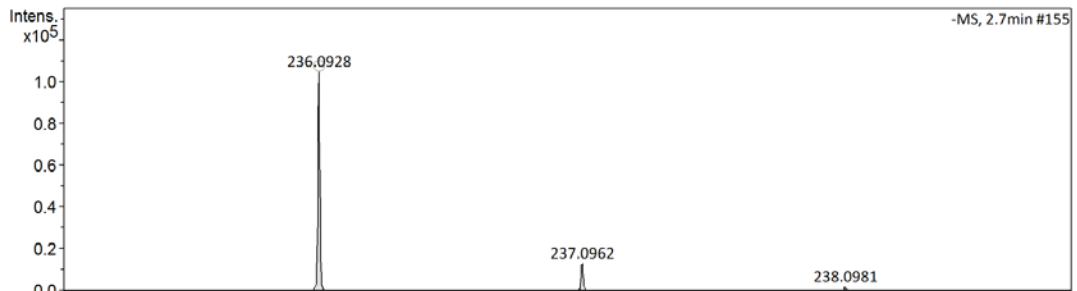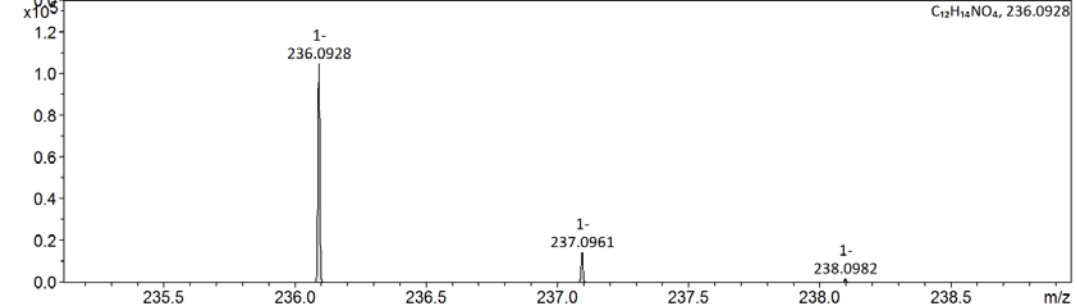

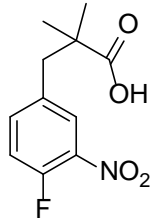

7-24

## Generic Display Report

### Analysis Info

Analysis Name D:\Data\data\202111\swp\HYL-d\_1-A,5\_01\_20676.d  
 Method pq-ms-neg-50-1000.m  
 Sample Name HYL-d  
 Comment

Acquisition Date 11/16/2021 10:39:12 AM

Operator BDAL@DE  
 Instrument impact II

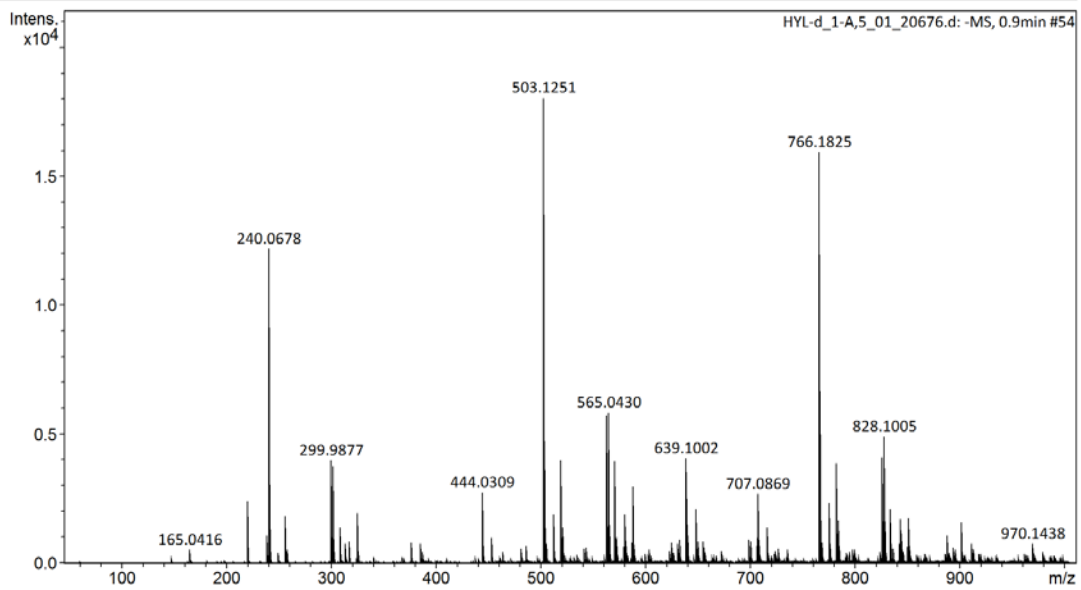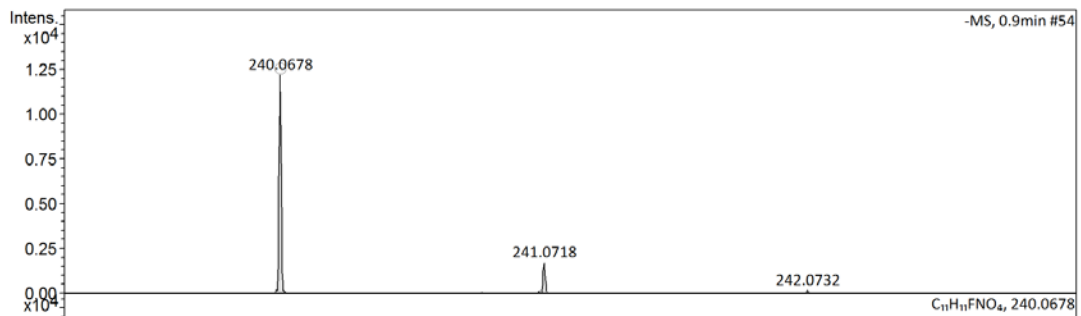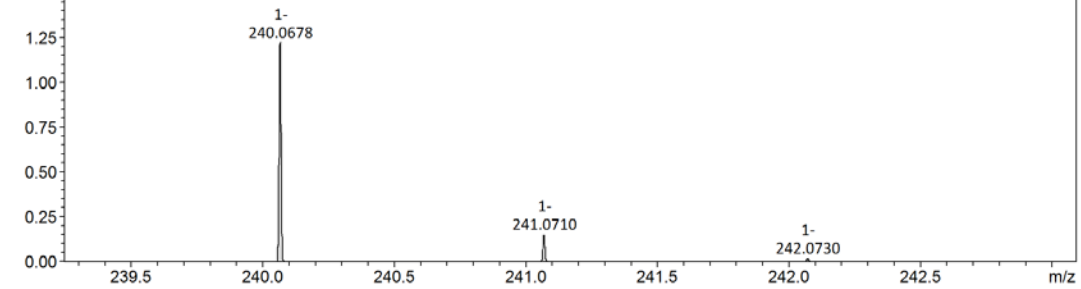

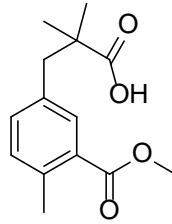

7-25

## Generic Display Report

### Analysis Info

Analysis Name D:\Data\data\202106\swp\HYL-19\_1-B,6\_01\_17233.d  
 Method pq-ms-neg-50-1000.m  
 Sample Name HYL-19  
 Comment

Acquisition Date 6/16/2021 10:00:25 AM

Operator BDAL@DE  
 Instrument impact II

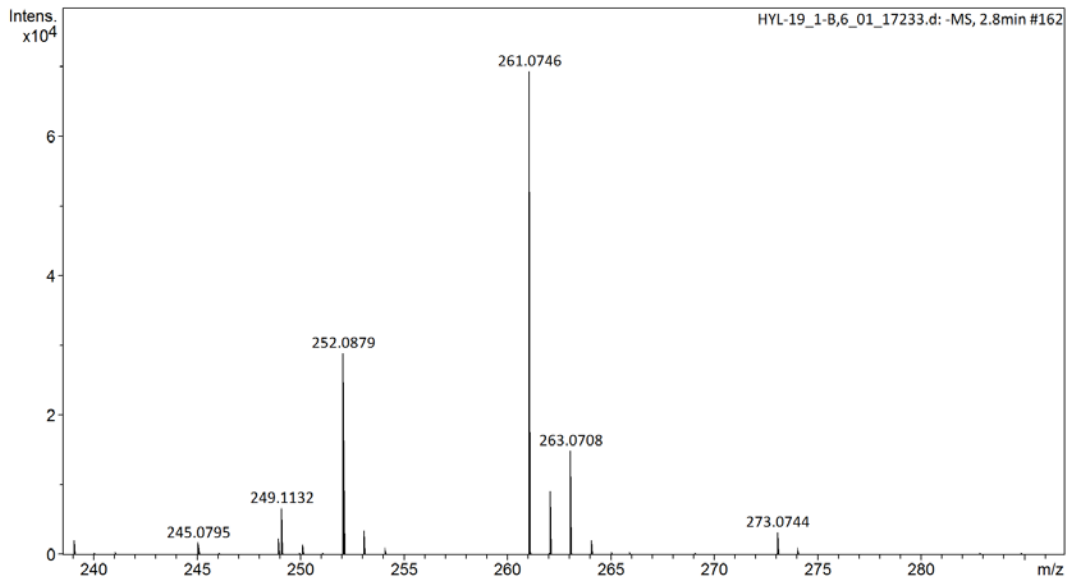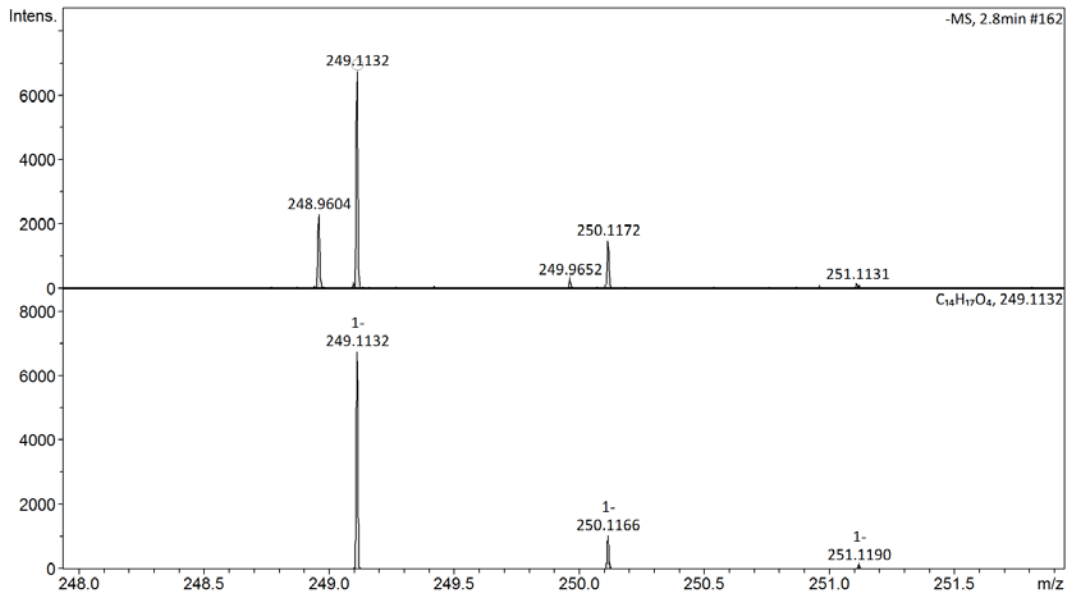

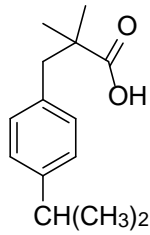

7-28

## Generic Display Report

### Analysis Info

Analysis Name D:\Data\data\202106\swp\HYL-28\_1-C,4\_01\_17297.d  
 Method pq-ms-neg-50-1000.m  
 Sample Name HYL-28  
 Comment

Acquisition Date 6/16/2021 4:07:22 PM

Operator BDAL@DE  
 Instrument impact II

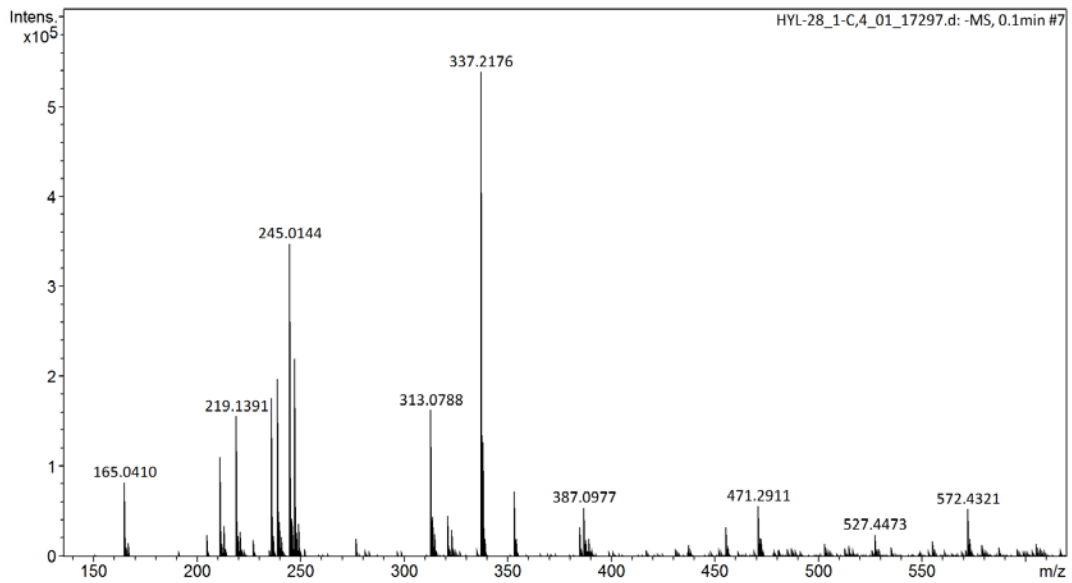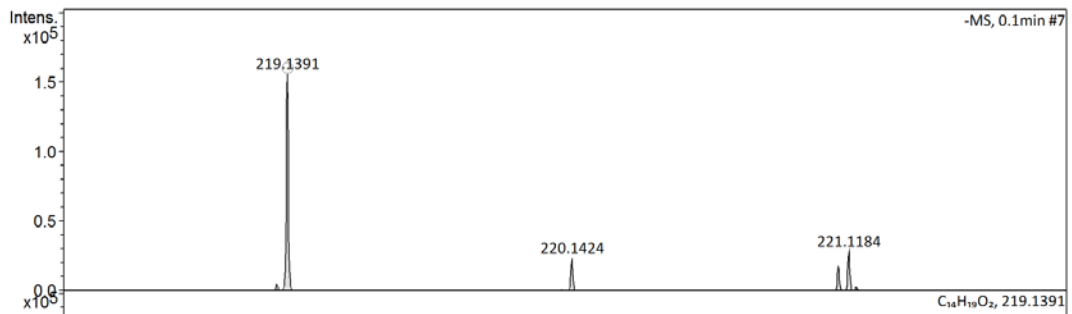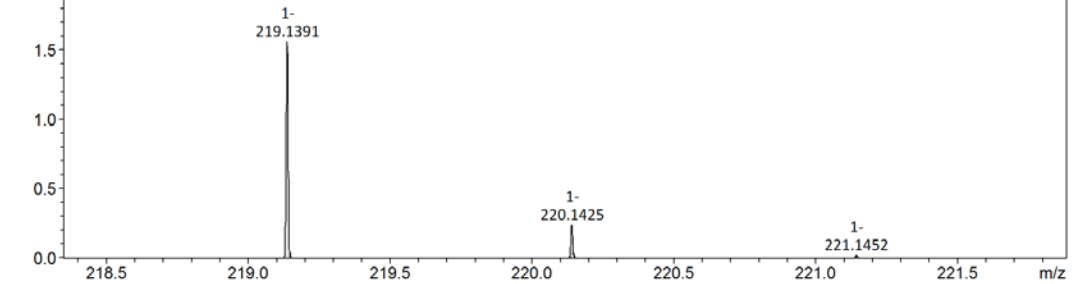

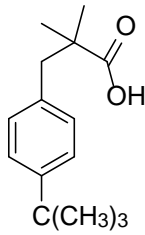

**7-29**

## Generic Display Report

**Analysis Info**

Analysis Name D:\Data\data\202106\swp\HYL-29\_1-C,5\_01\_17299.d  
 Method pq-ms-neg-50-1000.m  
 Sample Name HYL-29  
 Comment

Acquisition Date 6/16/2021 4:14:59 PM

Operator BDAL@DE  
 Instrument impact II

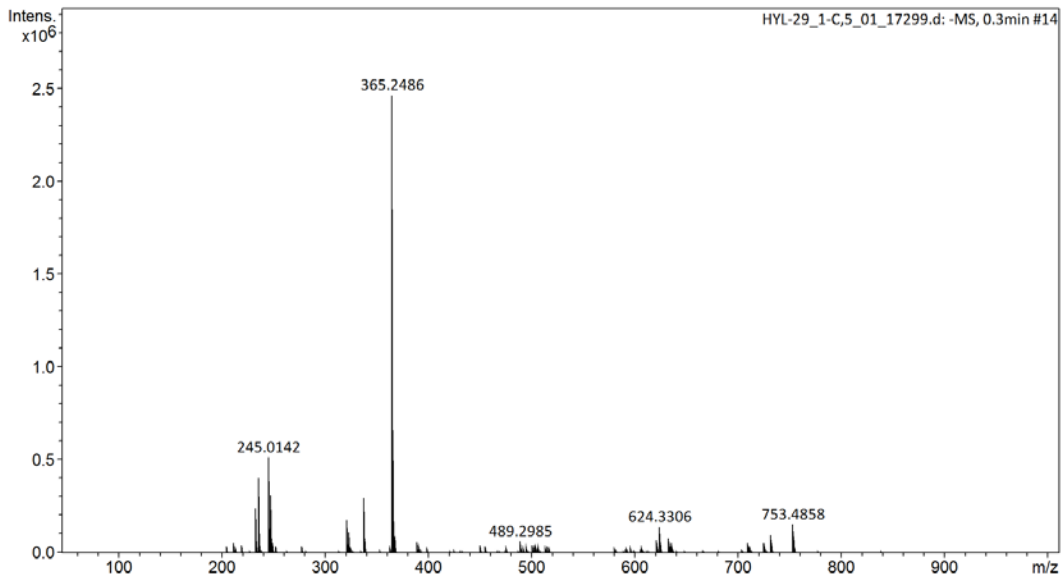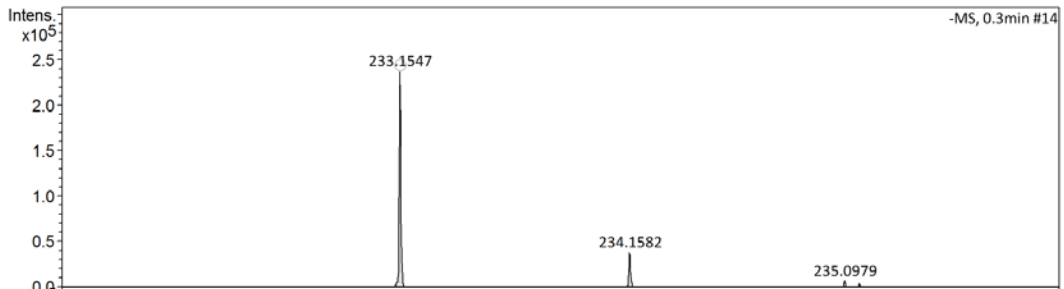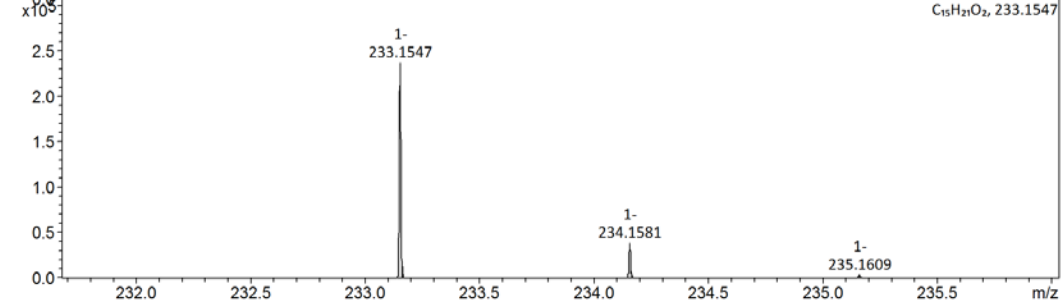



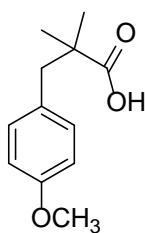

7-30

### Generic Display Report

**Analysis Info**

Analysis Name D:\Data\data\202106\swp\HYL-25\_1-C,1\_01\_17239.d  
 Method pq-ms-neg-50-1000.m  
 Sample Name HYL-25  
 Comment

Acquisition Date 6/16/2021 10:20:34 AM

Operator BDAL@DE  
 Instrument impact II

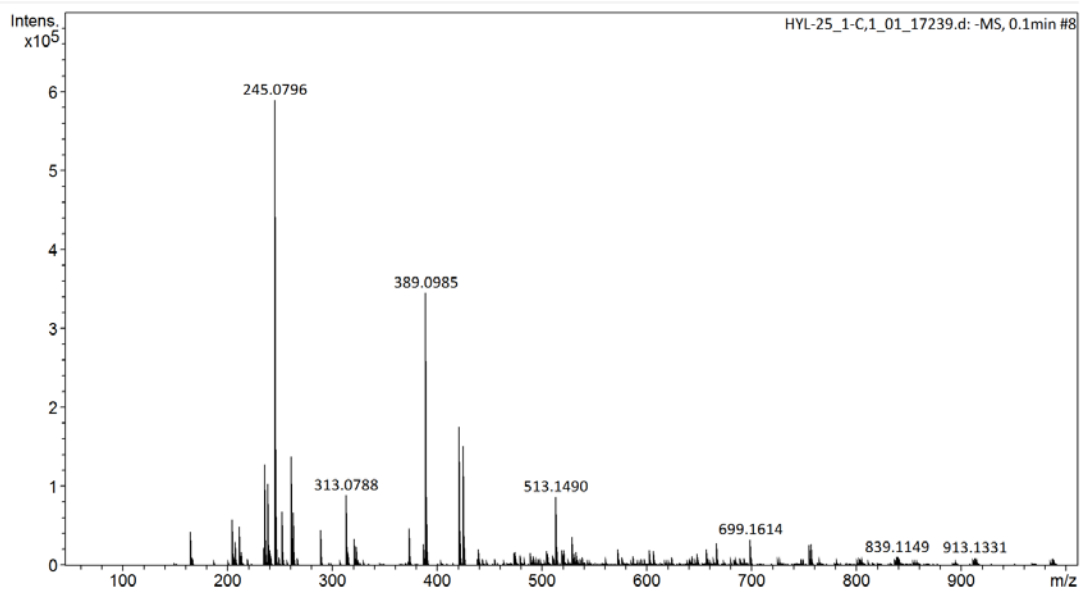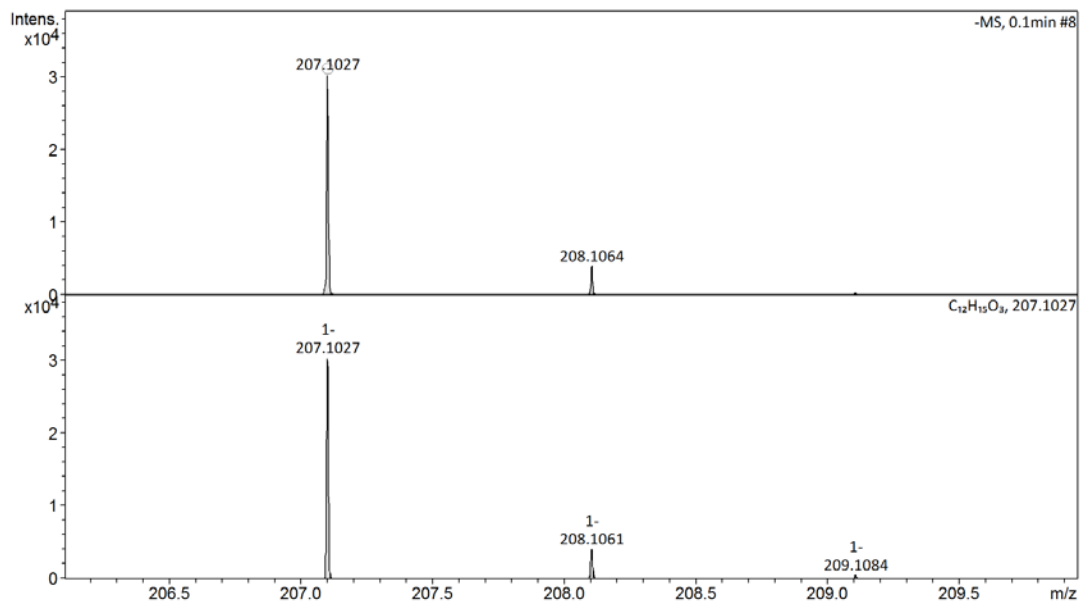

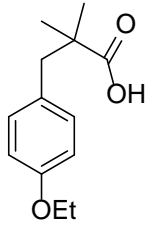

7-31

## Generic Display Report

### Analysis Info

Analysis Name D:\Data\data\202106\swp\HYL-26\_1-C,2\_01\_17288.d  
 Method pq-ms-neg-50-1000.m  
 Sample Name HYL-26  
 Comment

Acquisition Date 6/16/2021 3:33:27 PM

Operator BDAL@DE  
 Instrument impact II

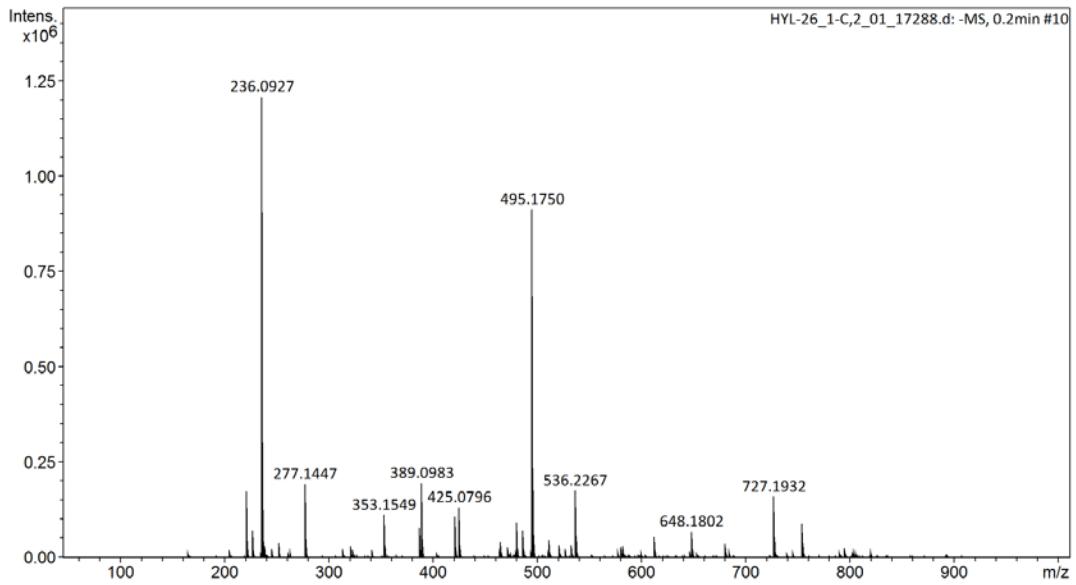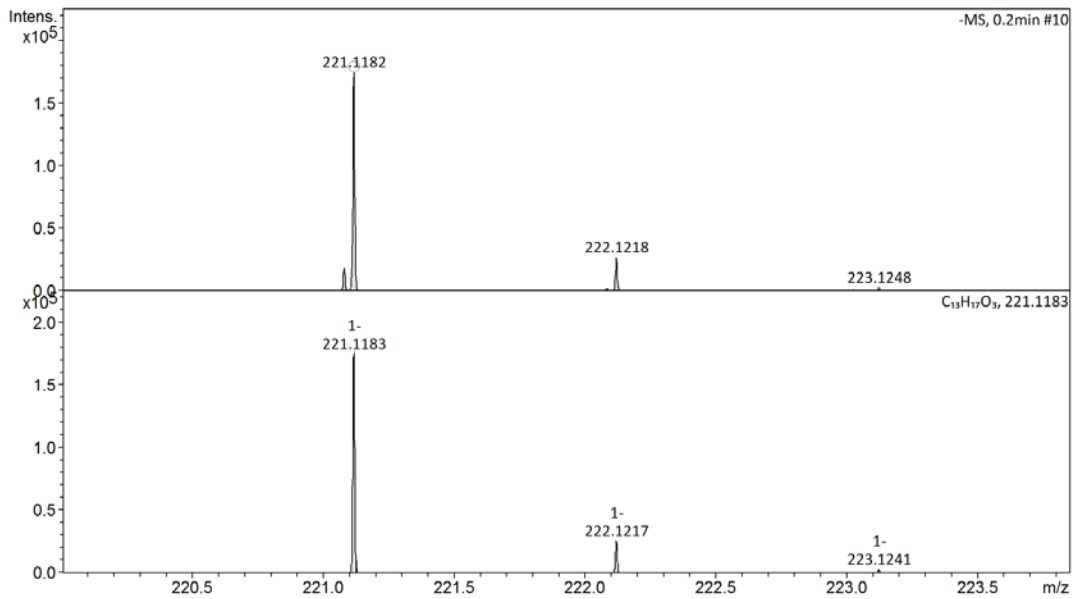

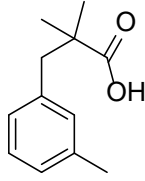

7-32

## Generic Display Report

### Analysis Info

Analysis Name D:\Data\data\202106\swp\HYL-27\_1-C,3\_01\_17290.d  
Method pq-ms-neg-50-1000.m  
Sample Name HYL-27  
Comment

Acquisition Date 6/16/2021 3:40:27 PM

Operator BDAL@DE  
Instrument impact II

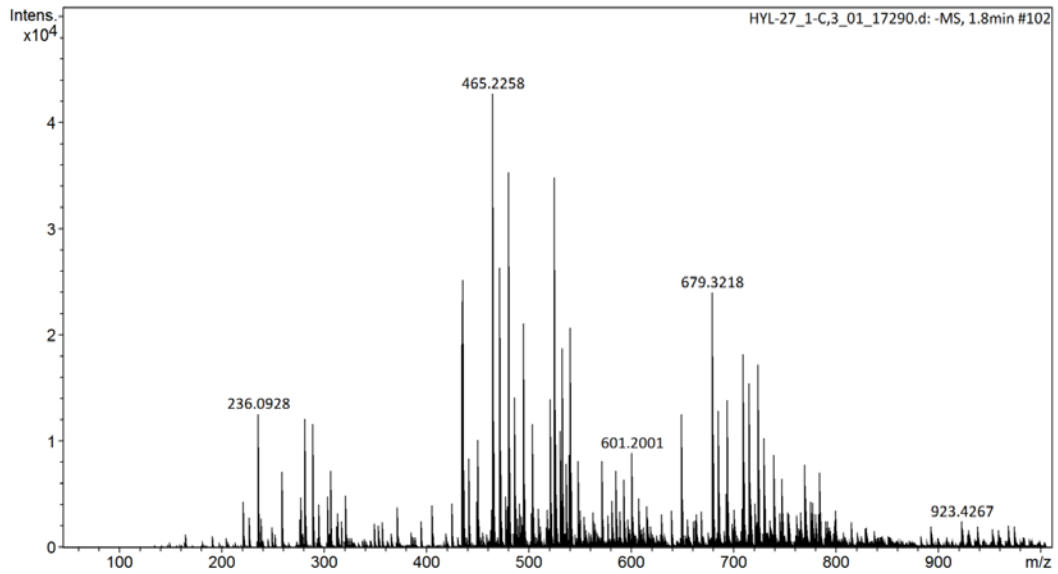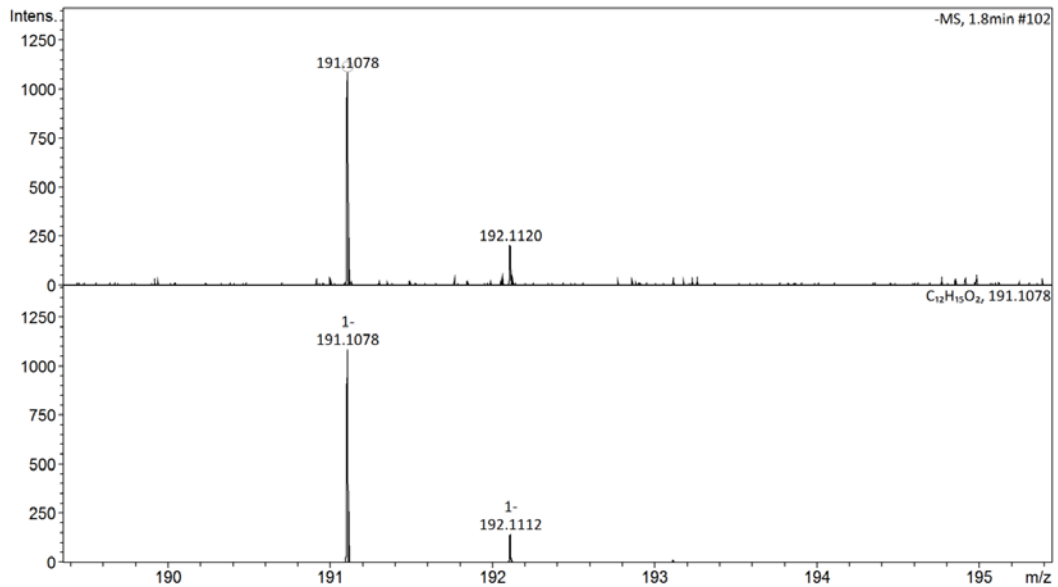

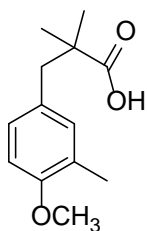

7-33

### Generic Display Report

**Analysis Info**

Analysis Name D:\Data\data\202106\swp\HYL-31\_1-C,7\_01\_17306.d  
 Method pq-ms-neg-50-1000.m  
 Sample Name HYL-31  
 Comment

Acquisition Date 6/16/2021 4:41:59 PM

Operator BDAL@DE  
 Instrument impact II

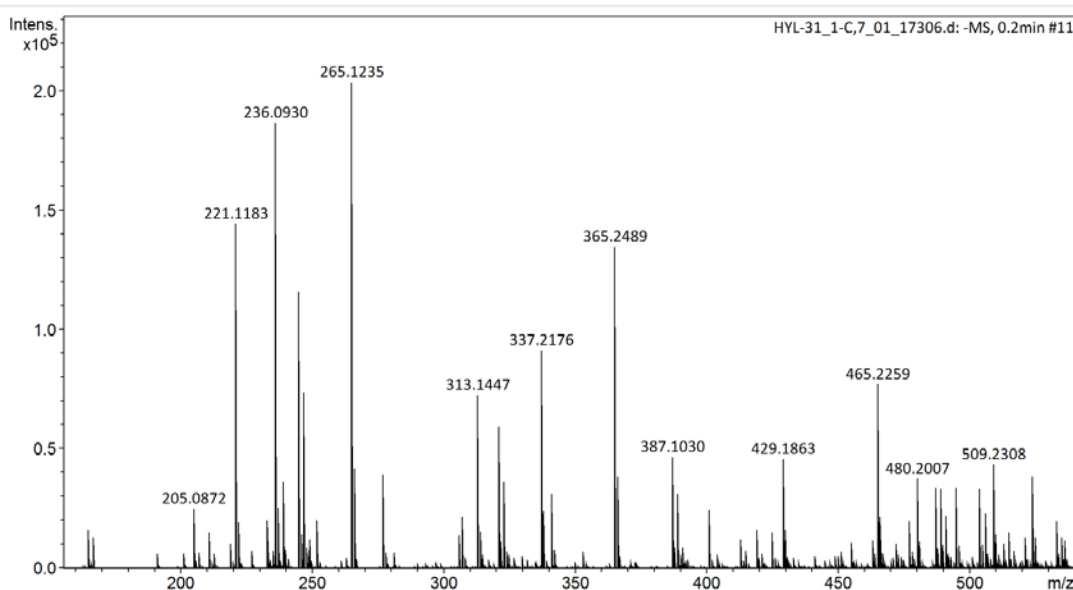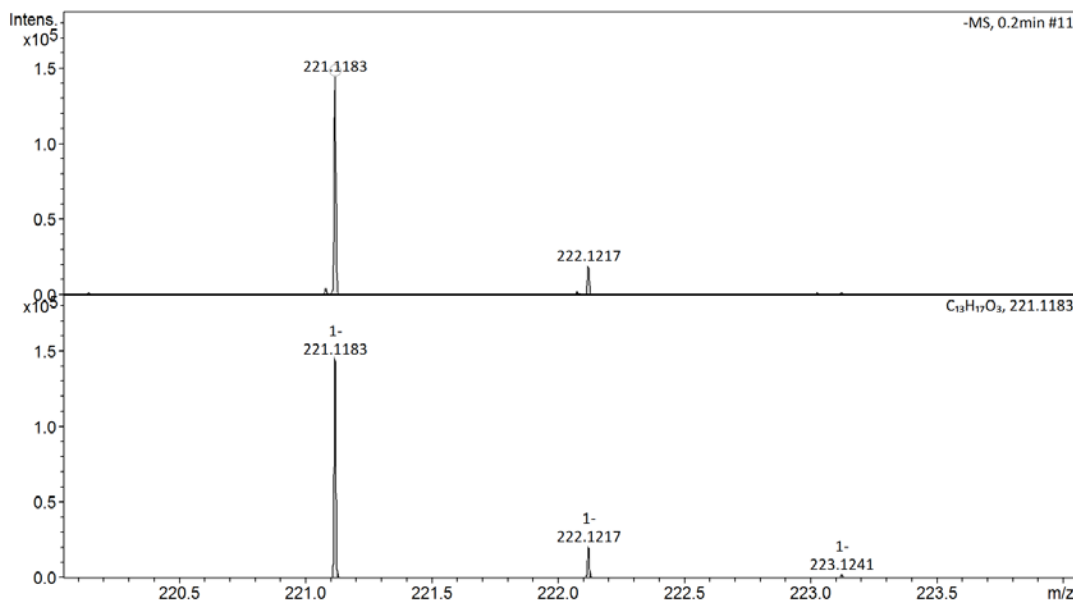

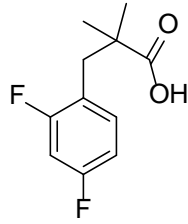

7-34

### Generic Display Report

**Analysis Info**

Analysis Name D:\Data\data\202106\swp\HYL-46\_1-B,1\_01\_17788.d  
Method pq-ms-neg-50-1000.m  
Sample Name HYL-46  
Comment

Acquisition Date 6/29/2021 3:46:06 PM

Operator BDAL@DE  
Instrument impact II

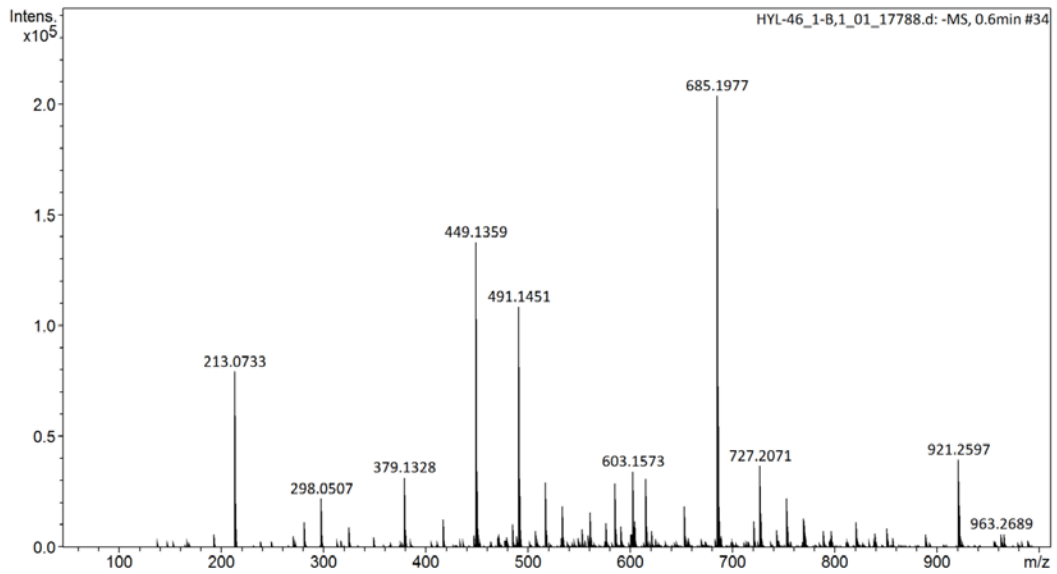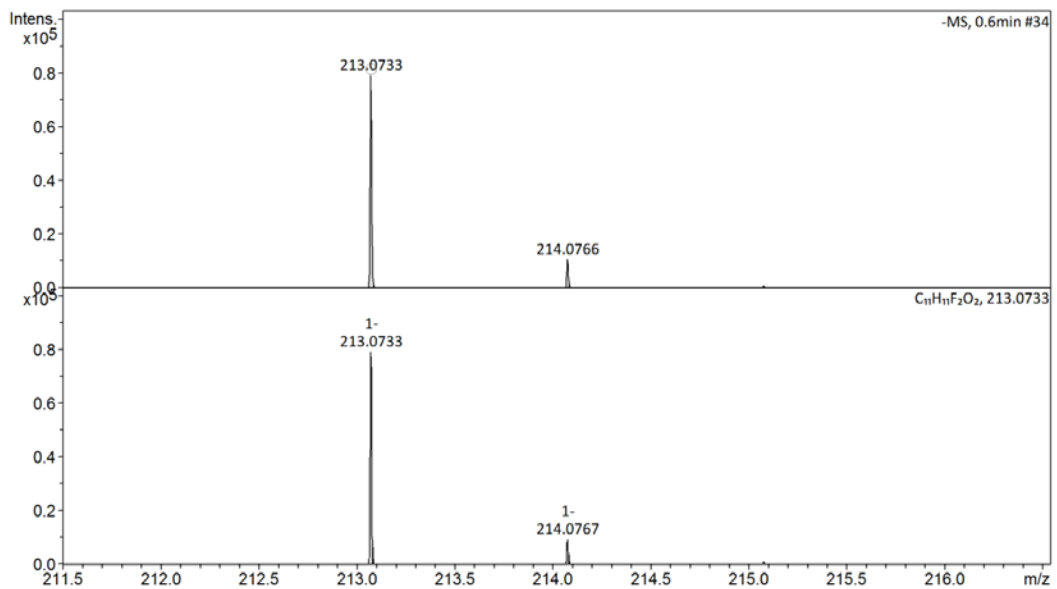

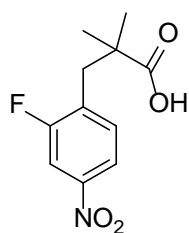

7-35

### Generic Display Report

**Analysis Info**

Analysis Name D:\Data\data\202111\swp\HYL-b\_1-A,3\_01\_20672.d  
 Method pq-ms-neg-50-1000.m  
 Sample Name HYL-b  
 Comment

Acquisition Date 11/16/2021 10:20:54 AM

Operator BDAL@DE  
 Instrument impact II

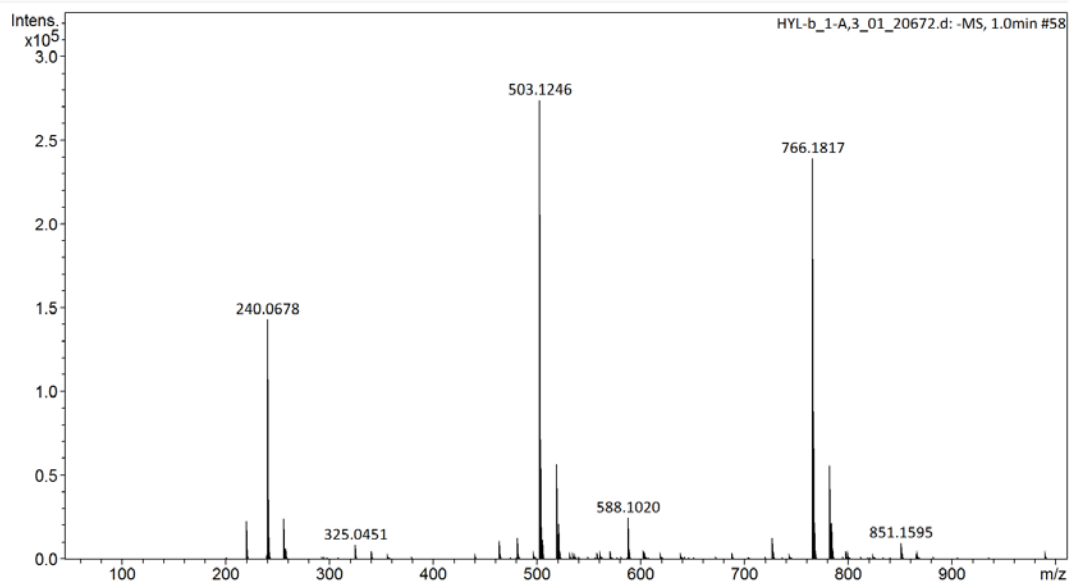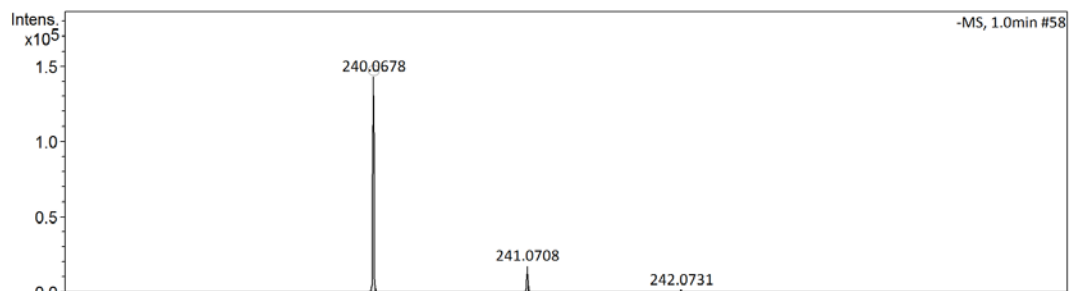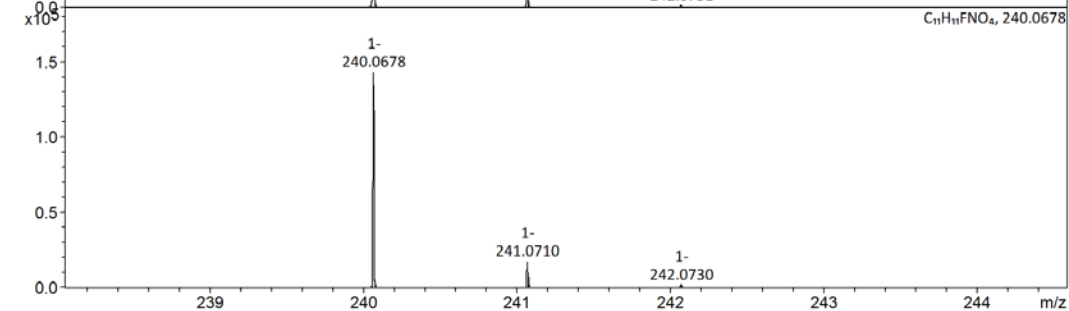

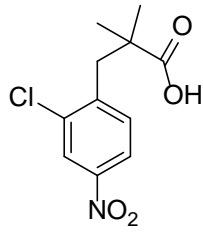

7-36

### Generic Display Report

**Analysis Info**

Analysis Name D:\Data\data\202111\swpl\HYL-a\_1-A,2\_01\_20669.d  
 Method pq-ms-neg-50-1000.m  
 Sample Name HYL-a  
 Comment

Acquisition Date 11/16/2021 10:05:12 AM

Operator BDAL@DE  
 Instrument impact II

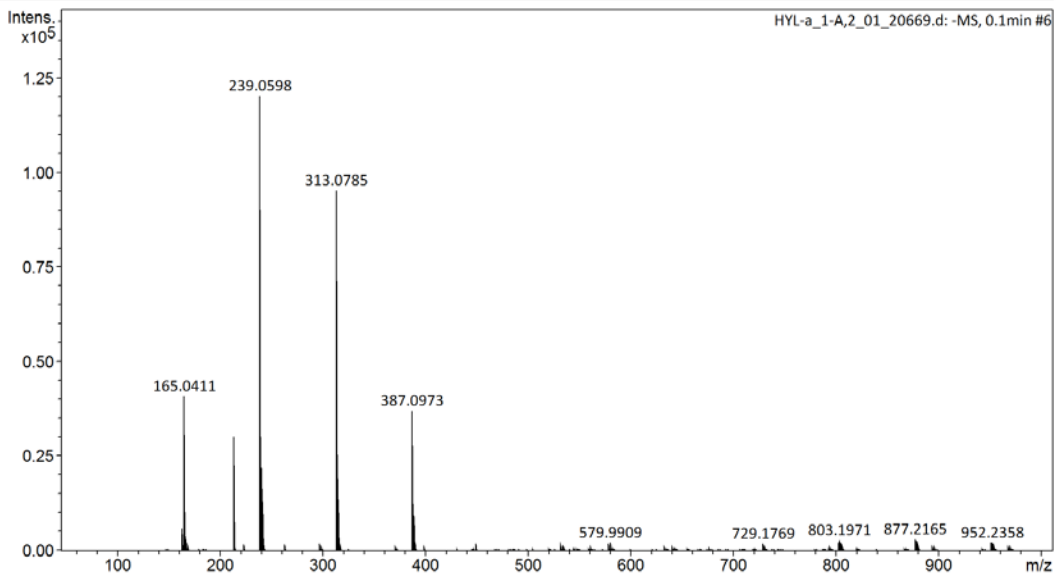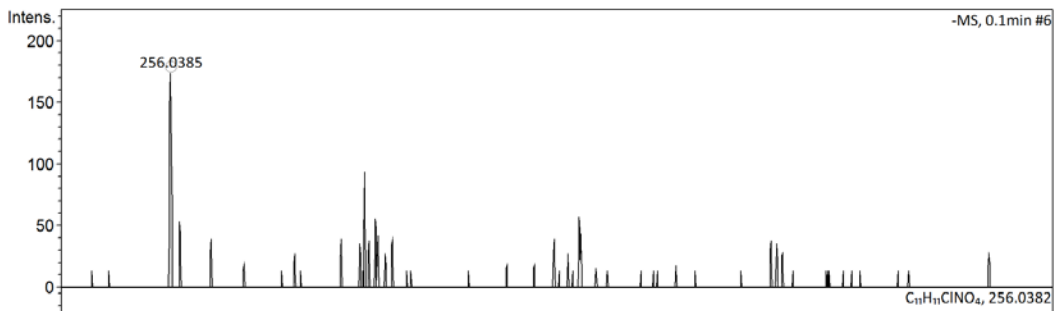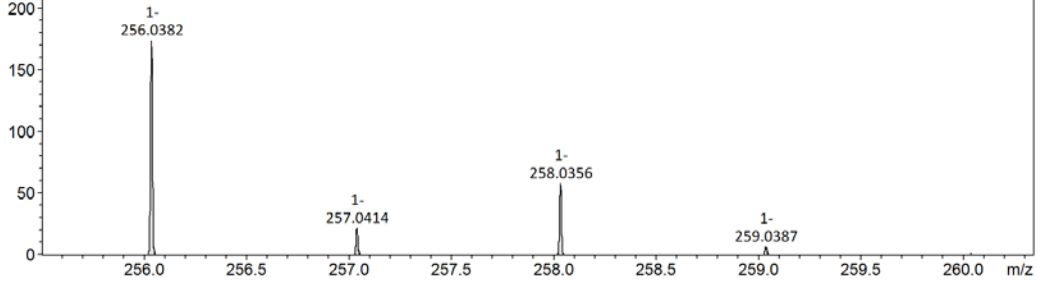

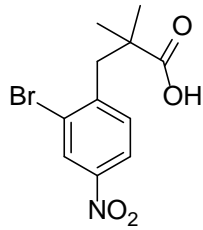

7-38

### Generic Display Report

**Analysis Info**

Analysis Name D:\Data\data\202111\swp\HYL-c\_1-A,4\_01\_20674.d  
 Method pq-ms-neg-50-1000.m  
 Sample Name HYL-c  
 Comment

Acquisition Date 11/16/2021 10:29:45 AM

Operator BDAL@DE  
 Instrument impact II

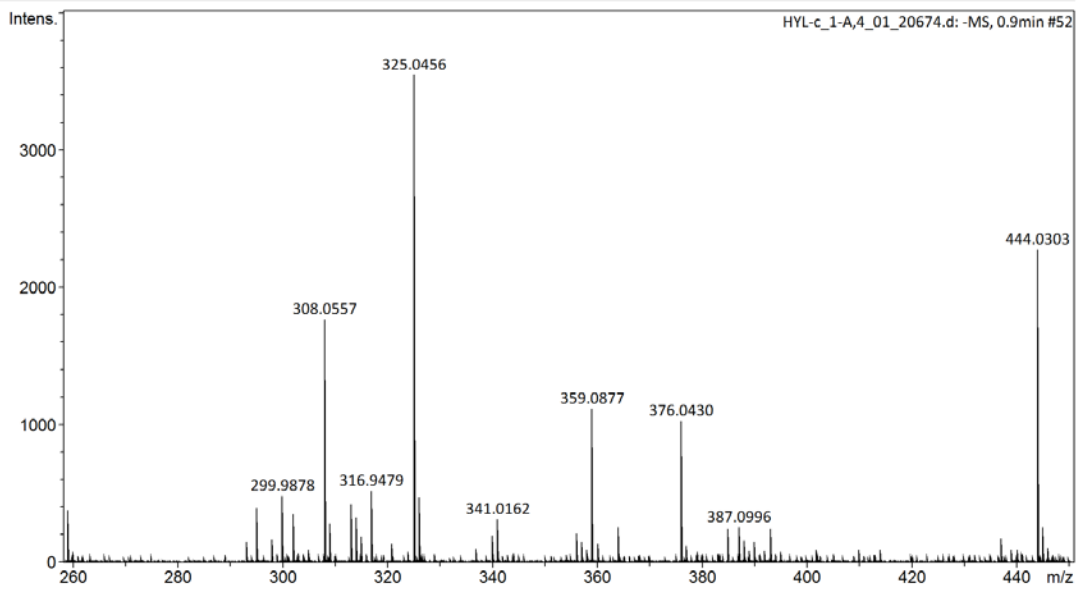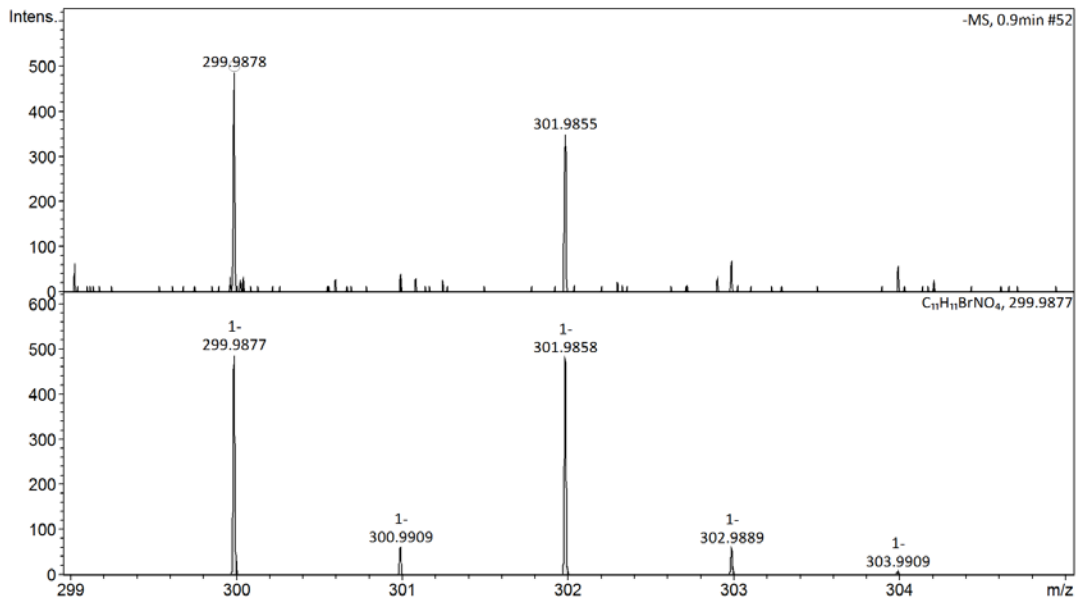



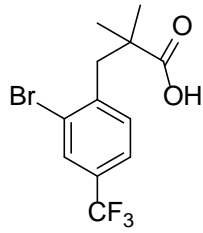

7-39

## Generic Display Report

### Analysis Info

Analysis Name D:\Data\data\202111\swp\HYL-e\_1-A,6\_01\_20678.d  
 Method pq-ms-neg-50-1000.m  
 Sample Name HYL-e  
 Comment

Acquisition Date 11/16/2021 10:46:17 AM

Operator BDAL@DE  
 Instrument impact II

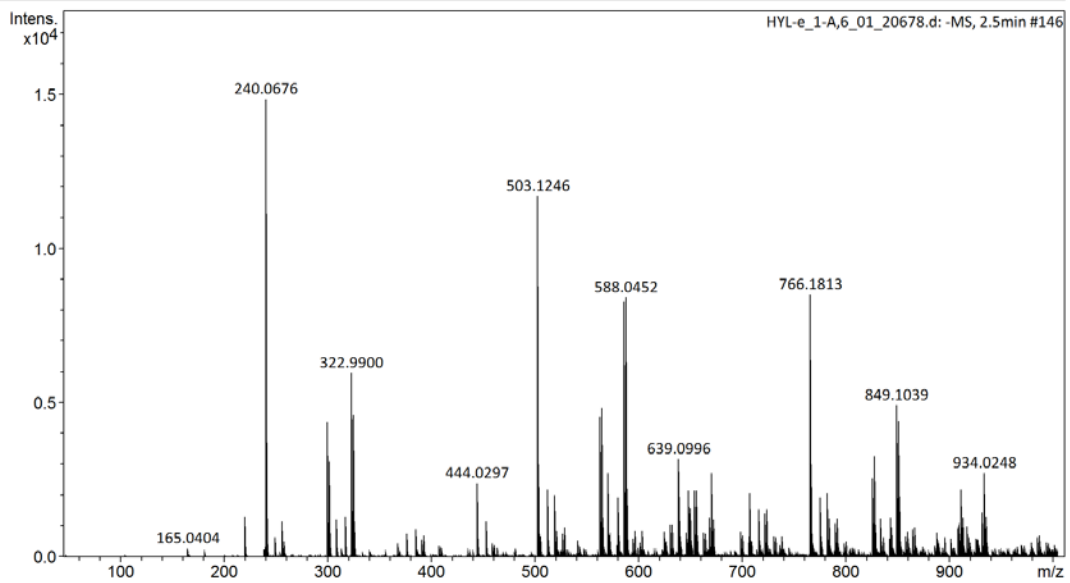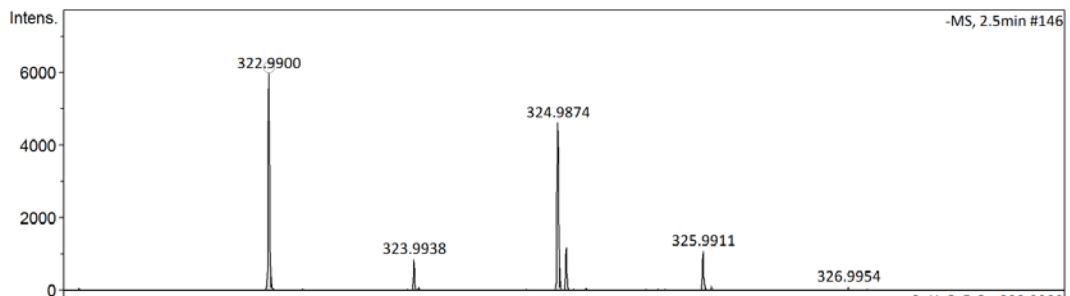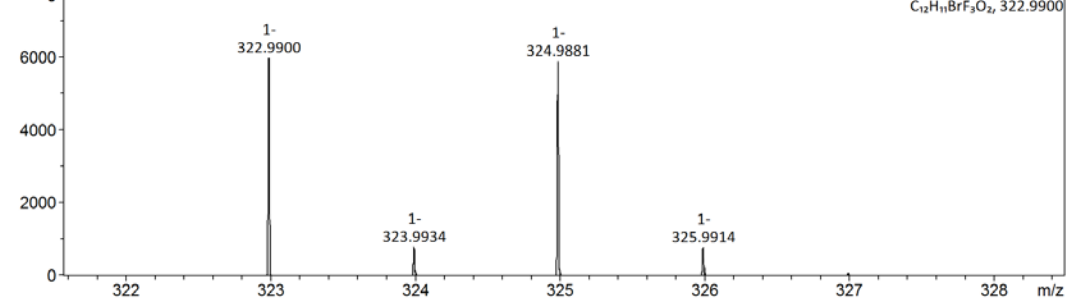

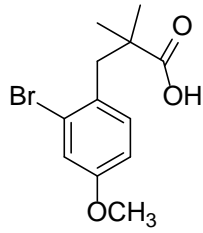

7-40

## Display Report

### Analysis Info

Analysis Name D:\Data\data\202112\swp\HYLE\_1-B,3\_01\_21141.d  
 Method pq-ms-neg-50-1000.m  
 Sample Name HYLE  
 Comment

Acquisition Date 12/15/2021 12:15:46 PM

Operator BDAL@DE  
 Instrument impact II 1825265.10133

### Acquisition Parameter

|             |          |                      |          |                  |           |
|-------------|----------|----------------------|----------|------------------|-----------|
| Source Type | ESI      | Ion Polarity         | Negative | Set Nebulizer    | 2.0 Bar   |
| Focus       | Active   | Set Capillary        | 3300 V   | Set Dry Heater   | 200 °C    |
| Scan Begin  | 50 m/z   | Set End Plate Offset | -500 V   | Set Dry Gas      | 8.0 l/min |
| Scan End    | 1000 m/z | Set Charging Voltage | 2000 V   | Set Divert Valve | Waste     |
|             |          | Set Corona           | 0 nA     | Set APCI Heater  | 0 °C      |

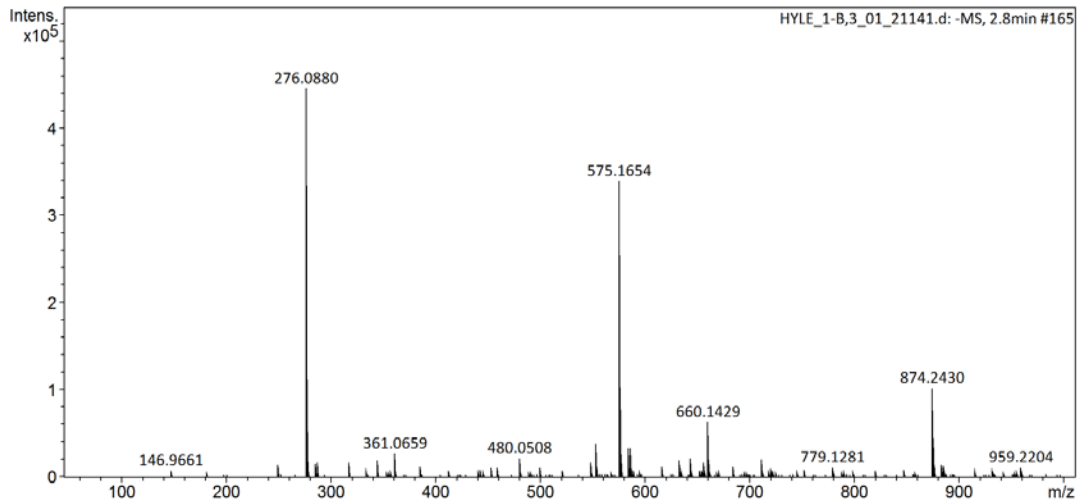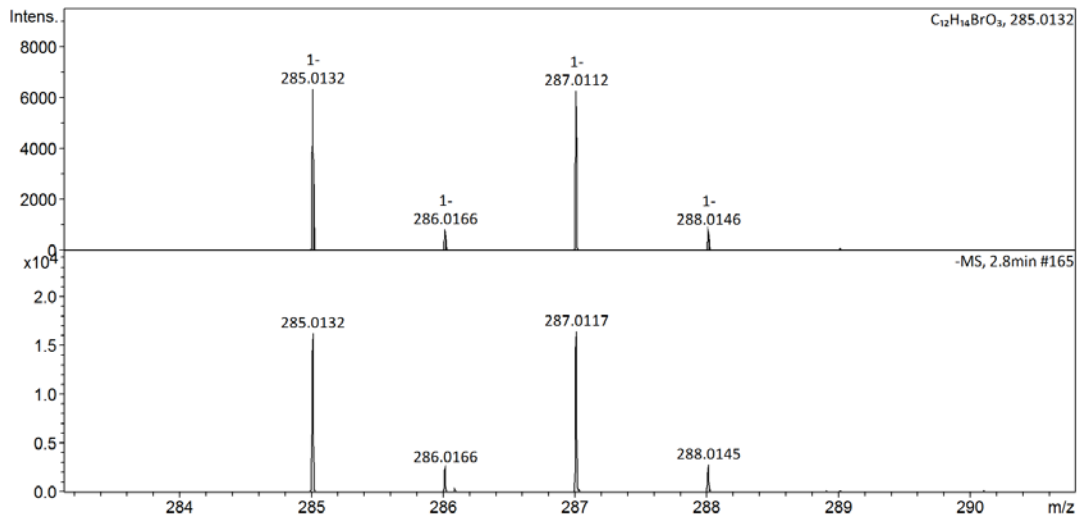

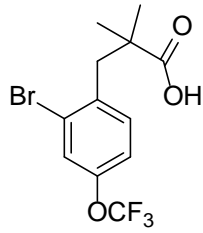

7-41

### Generic Display Report

**Analysis Info**

Analysis Name D:\Data\data\202111\swp\HYL-g\_1-A,8\_01\_20684.d  
 Method pq-ms-neg-50-1000.m  
 Sample Name HYL-g  
 Comment

Acquisition Date 11/16/2021 11:20:33 AM

Operator BDAL@DE  
 Instrument impact II

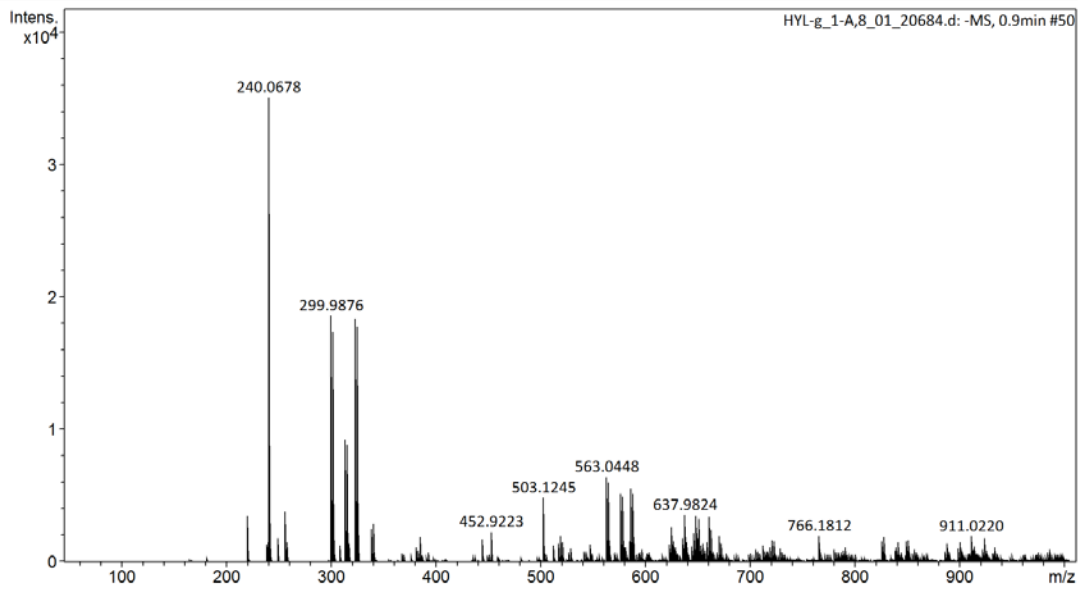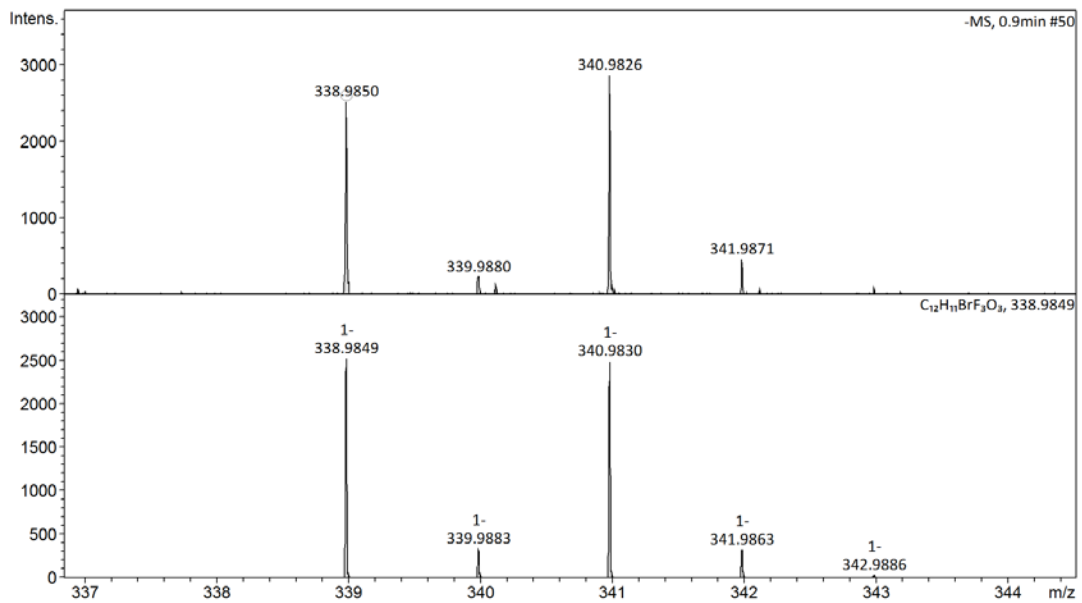

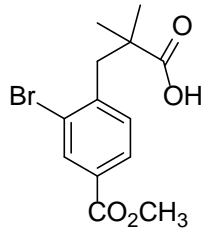

7-42

### Generic Display Report

**Analysis Info**

Analysis Name D:\Data\data\202111\swp\HYL-f\_1-B,5\_01\_20754.d  
 Method pq-ms-neg-20-800.m  
 Sample Name HYL-f  
 Comment

Acquisition Date 11/17/2021 11:50:39 AM

Operator BDAL@DE  
 Instrument impact II

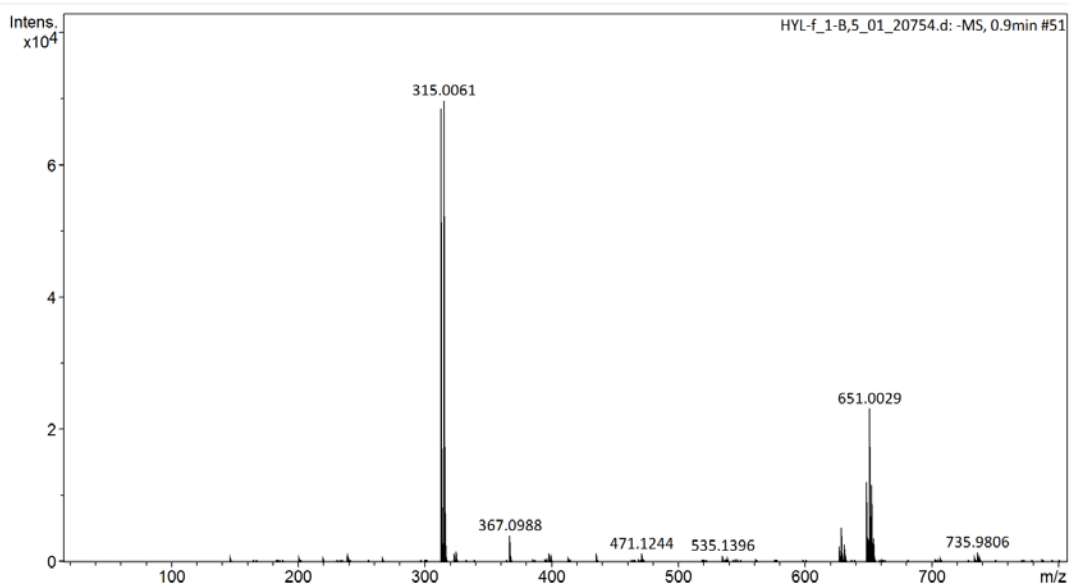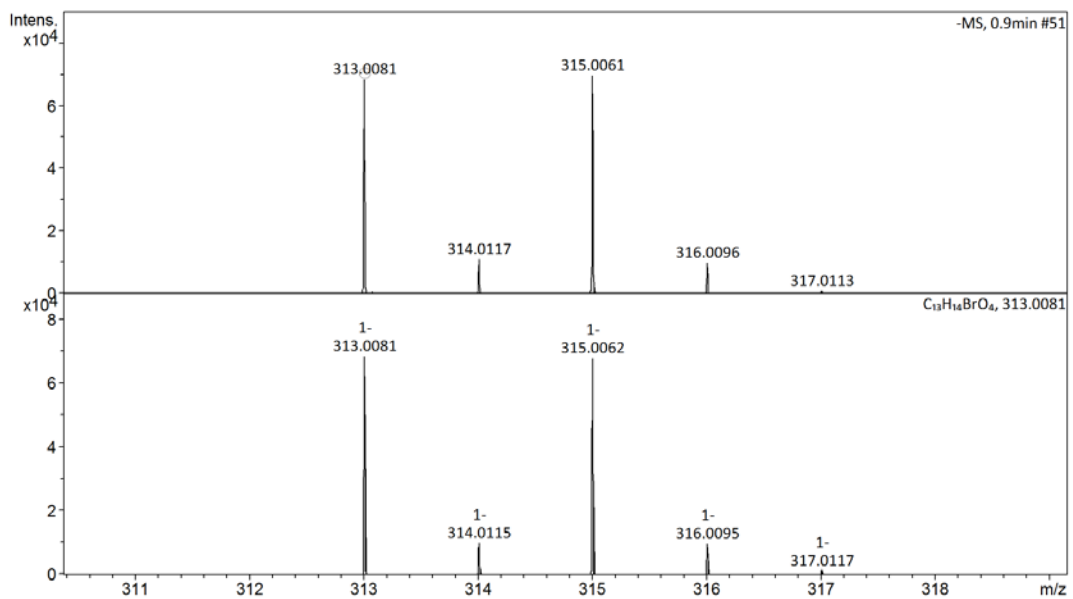

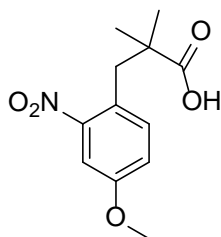

7-44

### Generic Display Report

**Analysis Info**

Analysis Name D:\Data\data\202106\swp\HYL-12\_1-A,8\_01\_17221.d  
 Method pq-ms-neg-50-1000.m  
 Sample Name HYL-12  
 Comment

Acquisition Date 6/16/2021 9:19:00 AM

Operator BDAL@DE  
 Instrument impact II

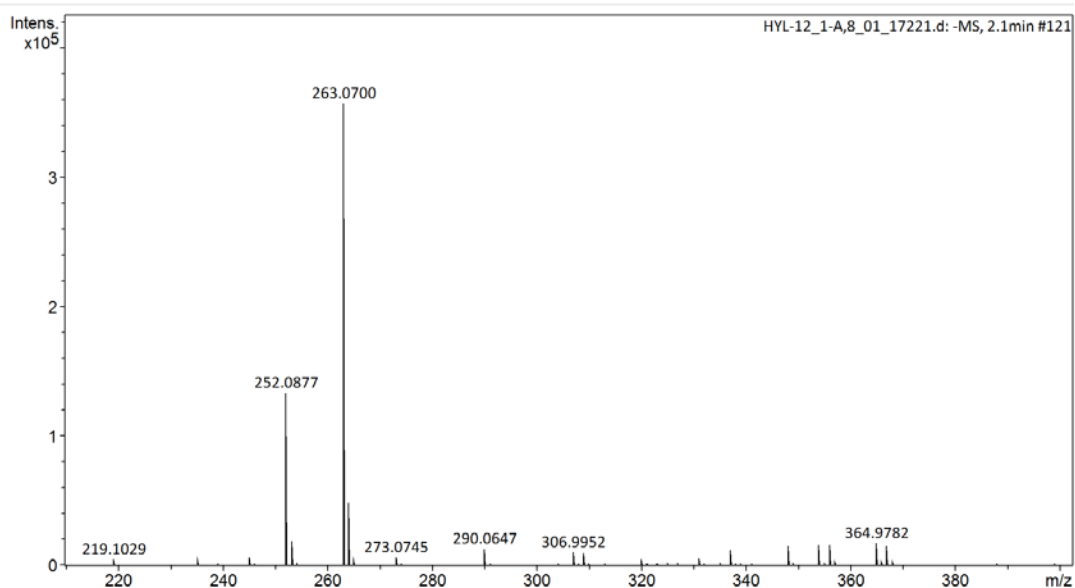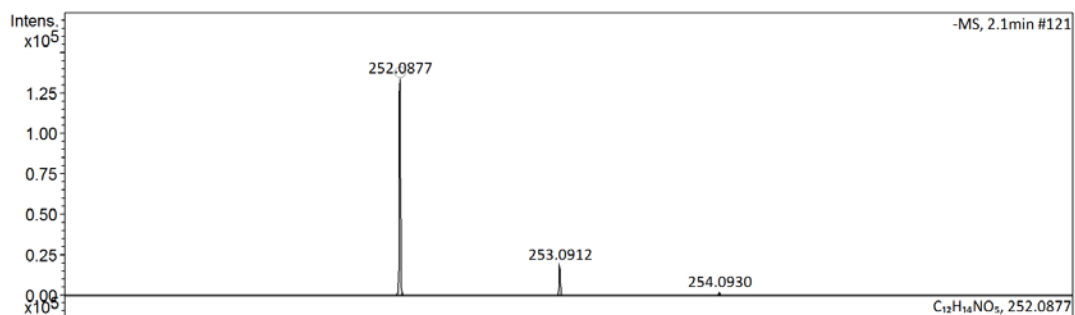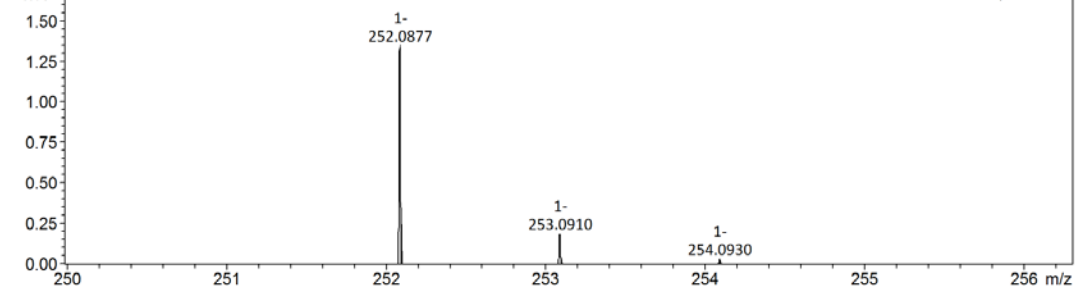

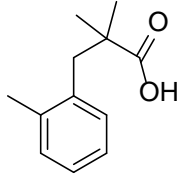

7-45

### Generic Display Report

**Analysis Info**

Analysis Name D:\Data\data\202111\swp\HYL-h\_1-B,1\_01\_20687.d  
Method pq-ms-neg-50-1000.m  
Sample Name HYL-h  
Comment

Acquisition Date 11/16/2021 11:43:20 AM

Operator BDAL@DE  
Instrument impact II

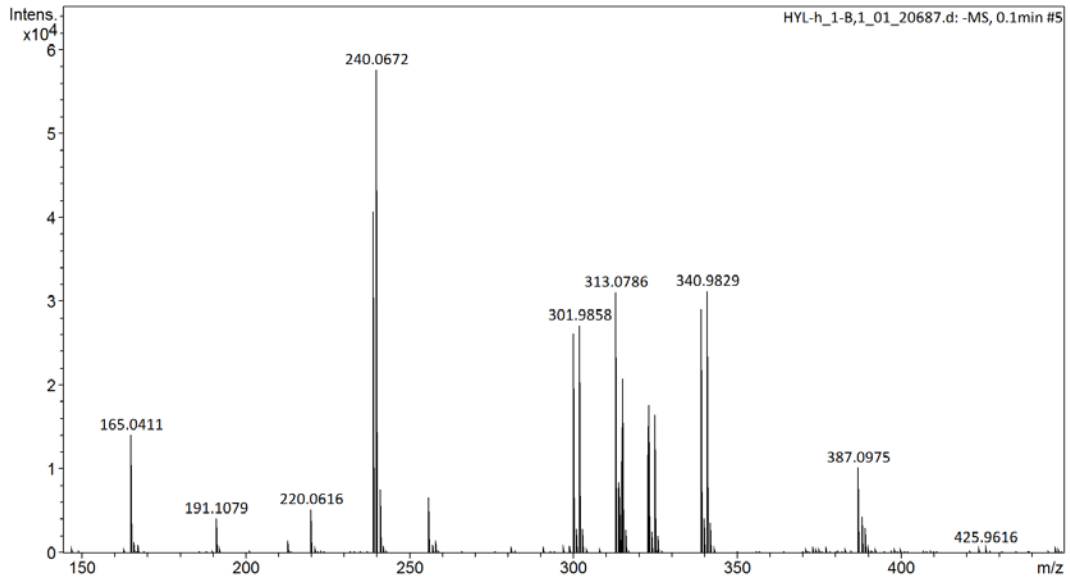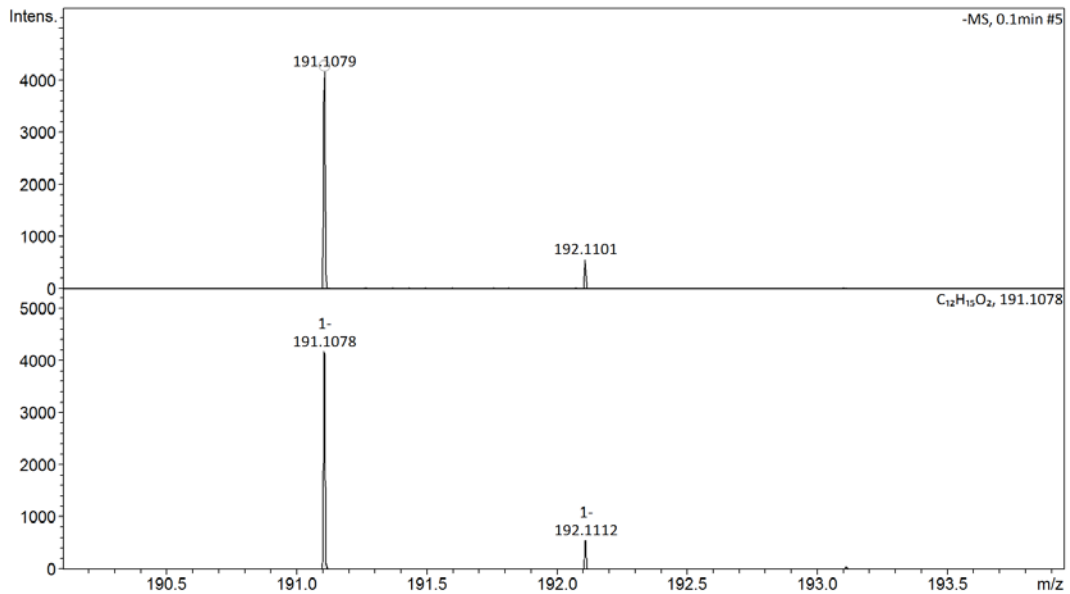

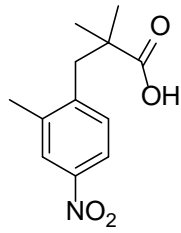

7-46

### Generic Display Report

**Analysis Info**

Analysis Name D:\Data\data\202106\swp\HYL-43\_1-D,7\_01\_17283.d  
 Method pq-ms-neg-50-1000.m  
 Sample Name HYL-43  
 Comment

Acquisition Date 6/16/2021 3:12:01 PM

Operator BDAL@DE  
 Instrument impact II

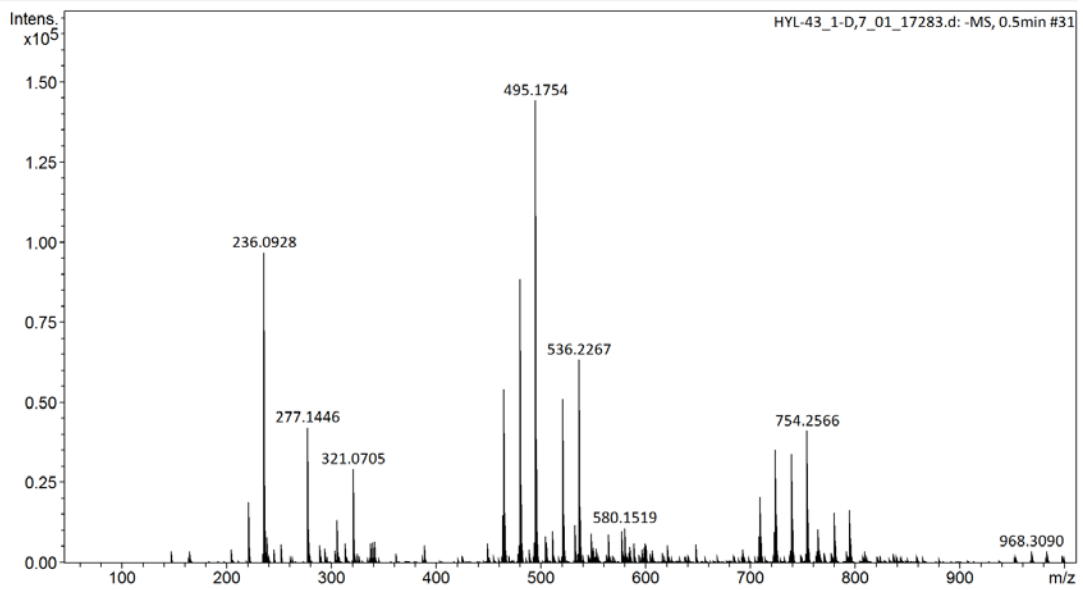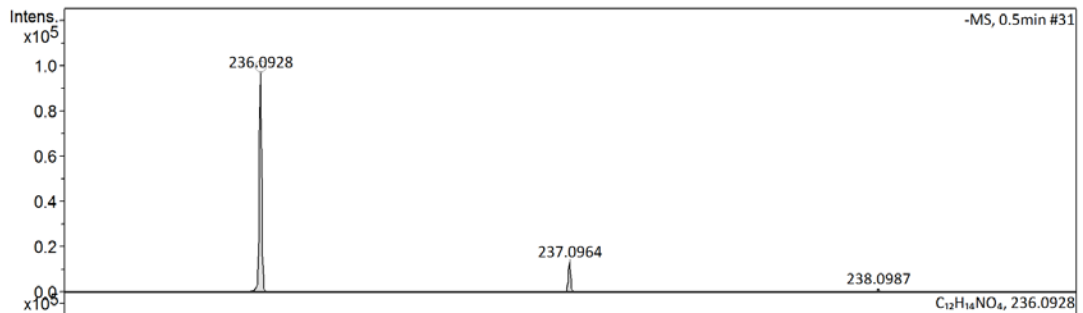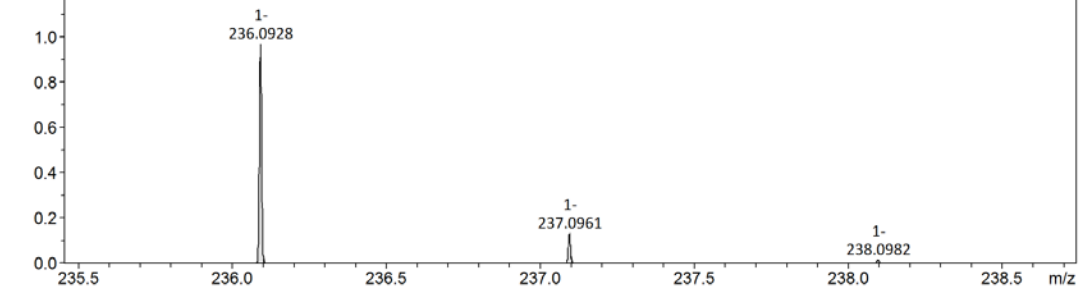

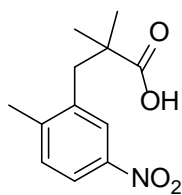

7-47

## Generic Display Report

### Analysis Info

Analysis Name D:\Data\data\202106\swp\HYL-44\_1-D,8\_01\_17278.d  
 Method pq-ms-neg-50-1000.m  
 Sample Name HYL-44  
 Comment

Acquisition Date 6/16/2021 2:54:19 PM

Operator BDAL@DE  
 Instrument impact II

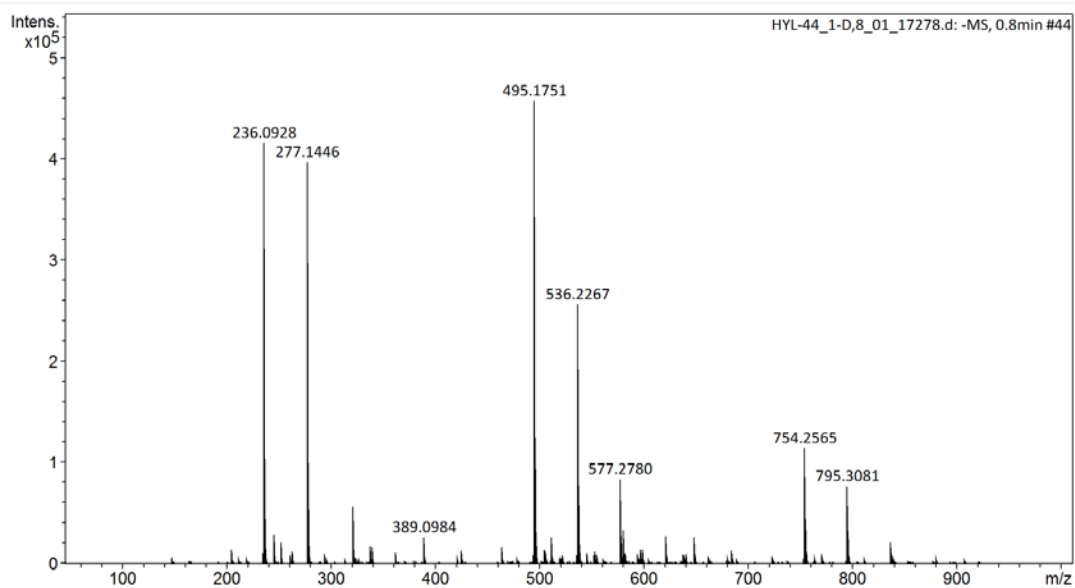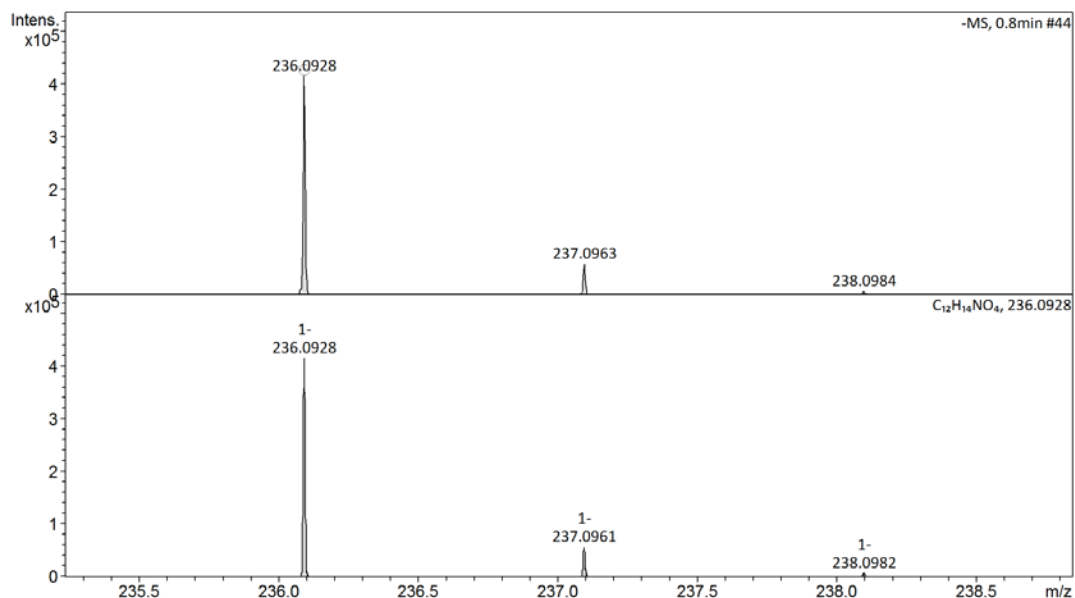



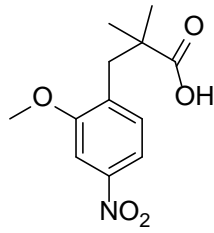

7-49

### Generic Display Report

**Analysis Info**

Analysis Name D:\Data\data\202106\swp\HYL-14\_1-B,2\_01\_17225.d  
 Method pq-ms-neg-50-1000.m  
 Sample Name HYL-14  
 Comment

Acquisition Date 6/16/2021 9:33:28 AM

Operator BDAL@DE  
 Instrument impact II

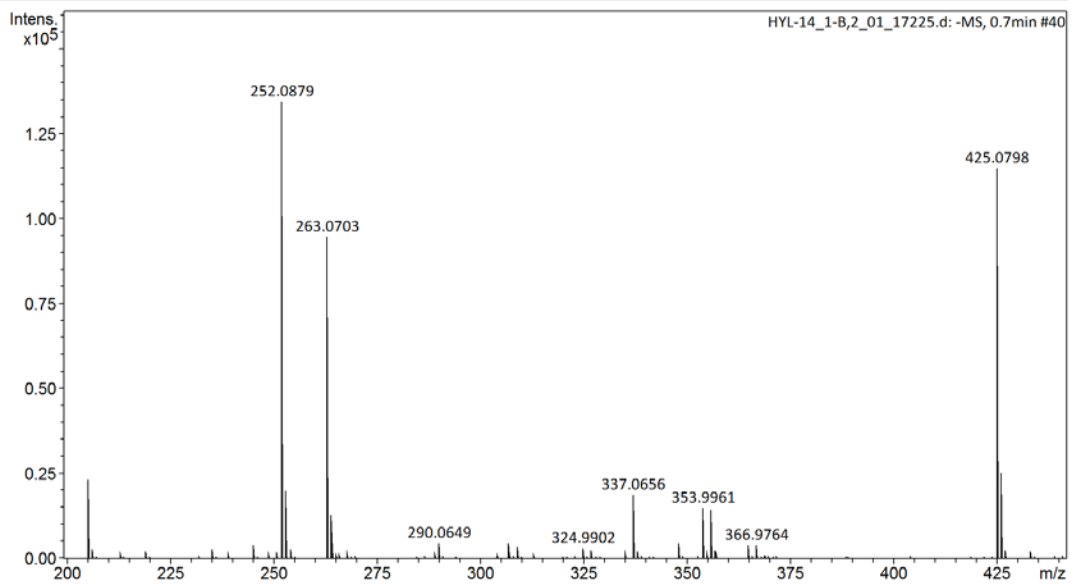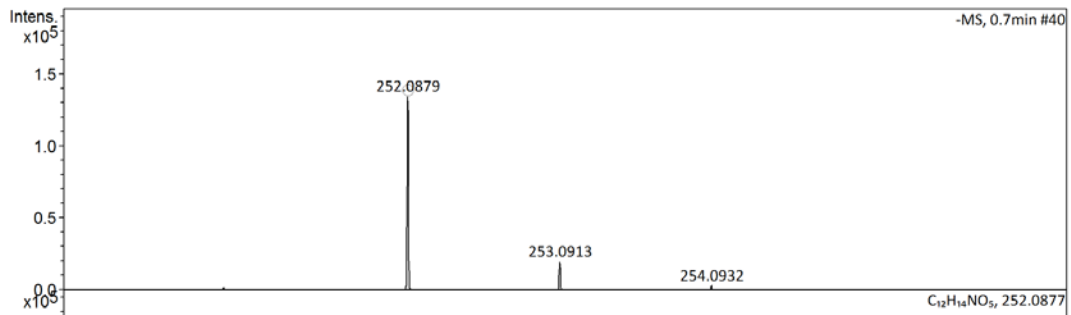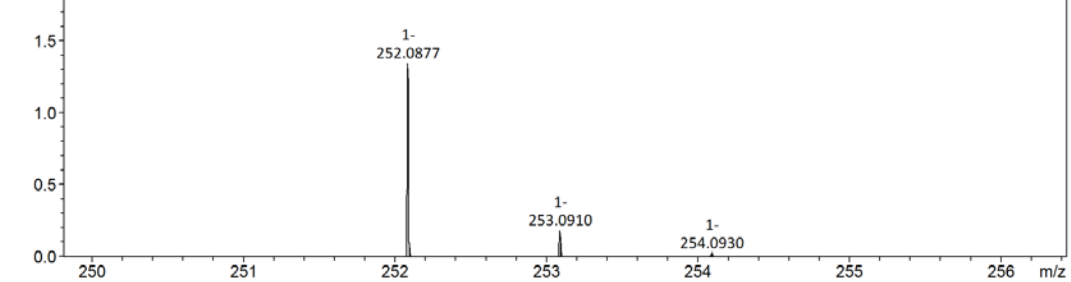

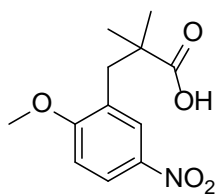

7-50

### Generic Display Report

**Analysis Info**

Analysis Name D:\Data\data\202106\swp\HYL-13\_1-B,1\_01\_17223.d  
 Method pq-ms-neg-50-1000.m  
 Sample Name HYL-13  
 Comment

Acquisition Date 6/16/2021 9:25:44 AM

Operator BDAL@DE  
 Instrument impact II

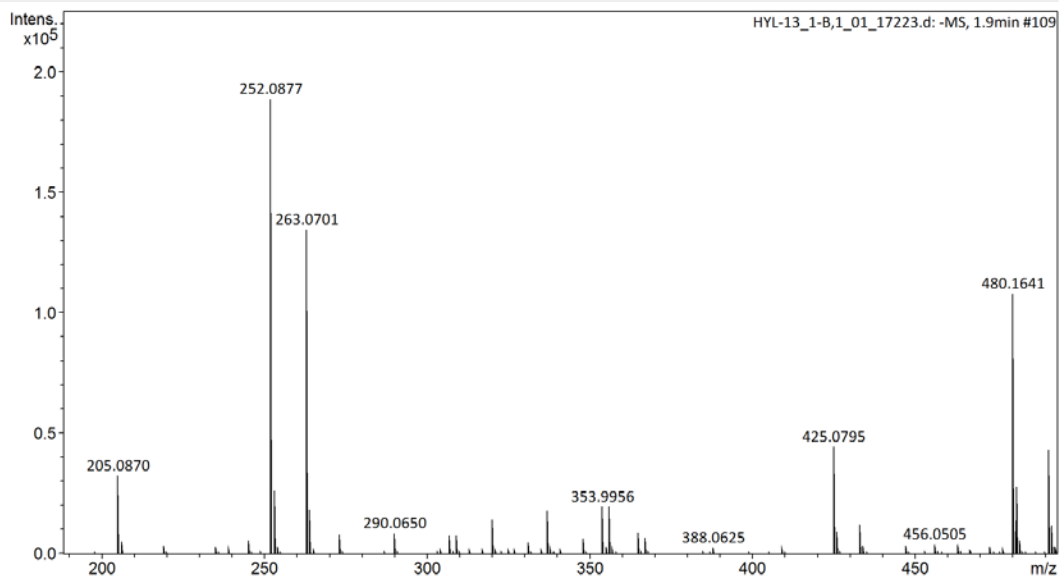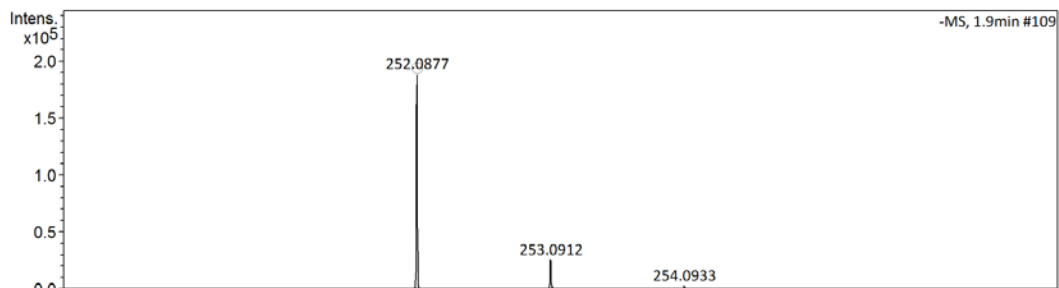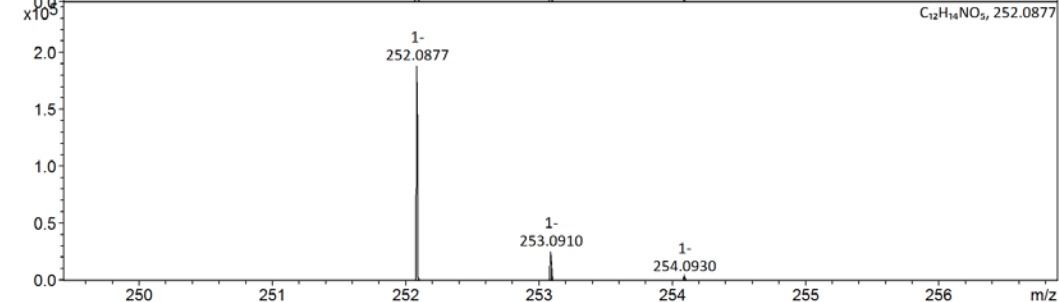

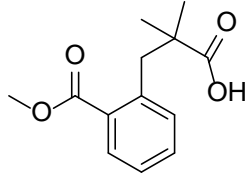

7-51

### Generic Display Report

**Analysis Info**

Analysis Name D:\Data\data\202106\swp\HYL-42\_1-D,6\_01\_17265.d  
Method pq-ms-neg-50-1000.m  
Sample Name HYL-42  
Comment

Acquisition Date 6/16/2021 12:03:12 PM

Operator BDAL@DE  
Instrument impact II

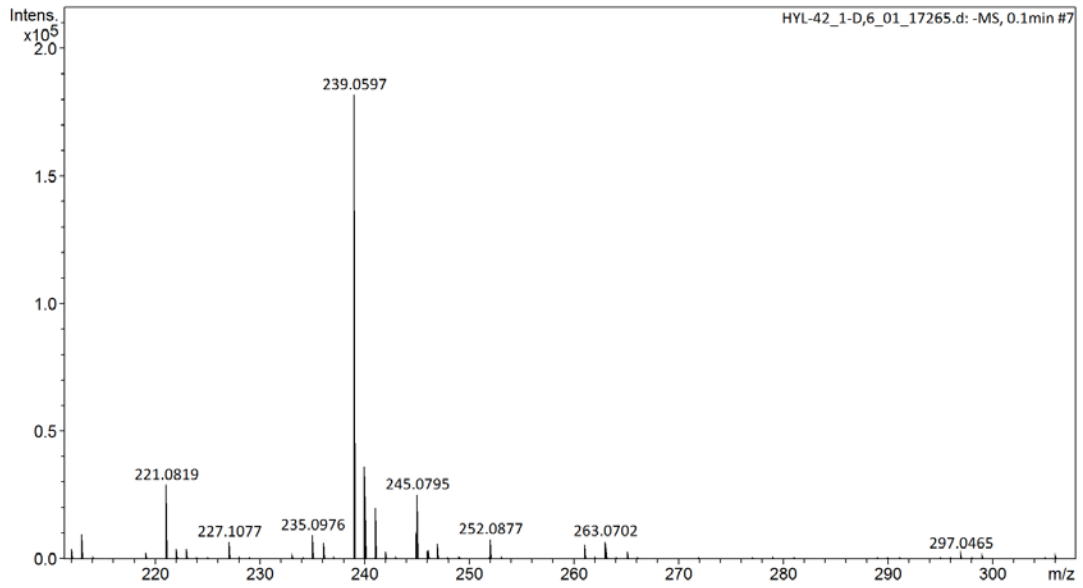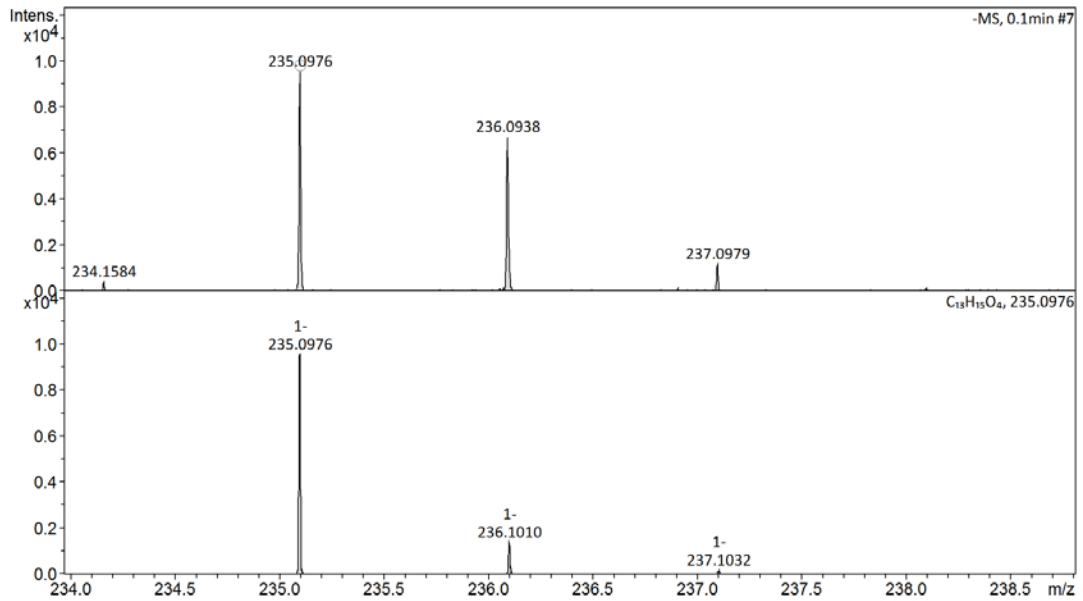

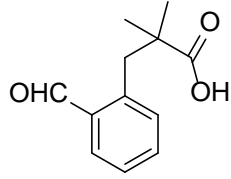

7-52

### Generic Display Report

**Analysis Info**

Analysis Name D:\Data\data\202106\swp\HYL-41\_1-D,5\_01\_17263.d  
Method pq-ms-neg-50-1000.m  
Sample Name HYL-41  
Comment

Acquisition Date 6/16/2021 11:56:27 AM

Operator BDAL@DE  
Instrument impact II

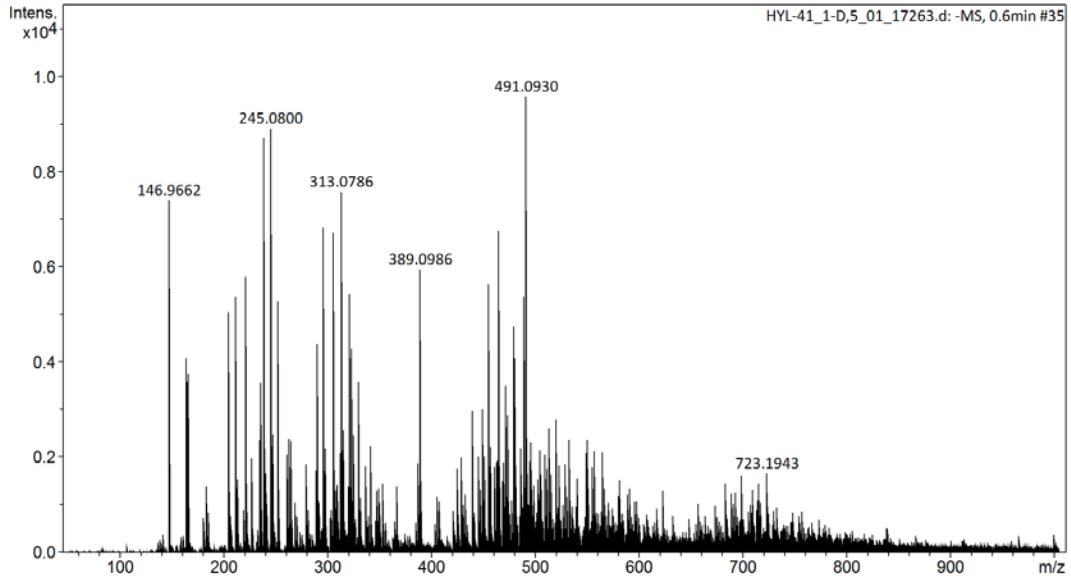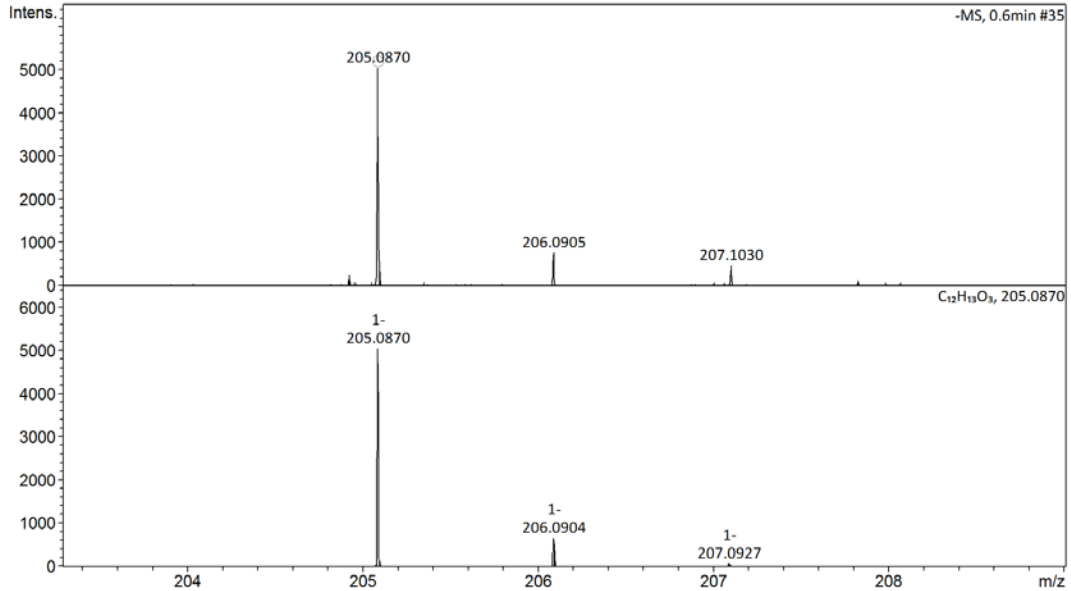

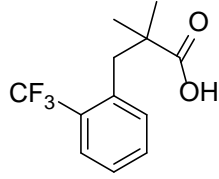

7-53

### Generic Display Report

**Analysis Info**

Analysis Name D:\Data\data\202106\swp\HYL-20\_1-B,7\_01\_17235.d  
Method pq-ms-neg-50-1000.m  
Sample Name HYL-20  
Comment

Acquisition Date 6/16/2021 10:07:08 AM

Operator BDAL@DE  
Instrument impact II

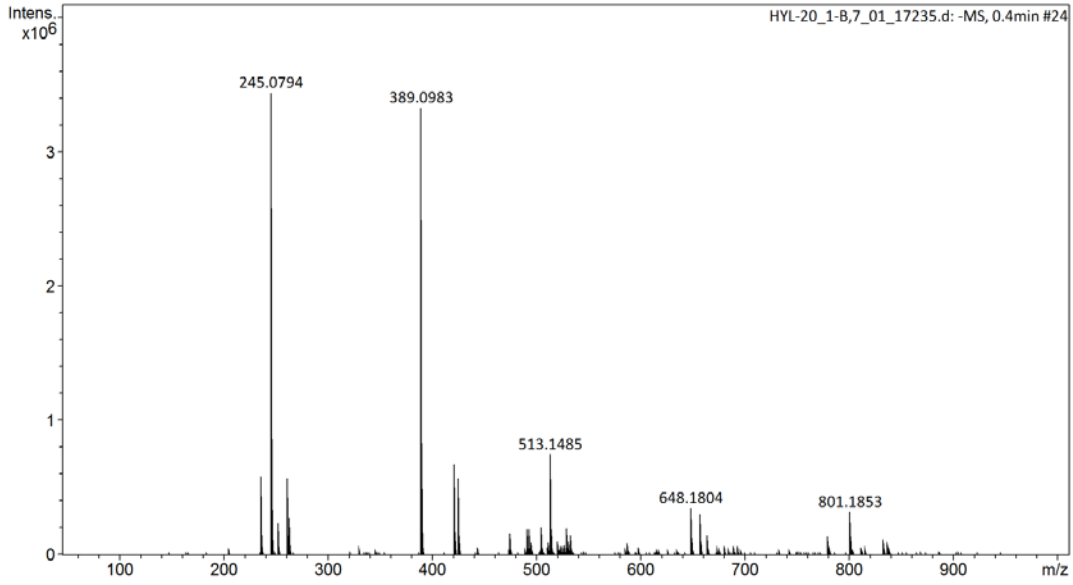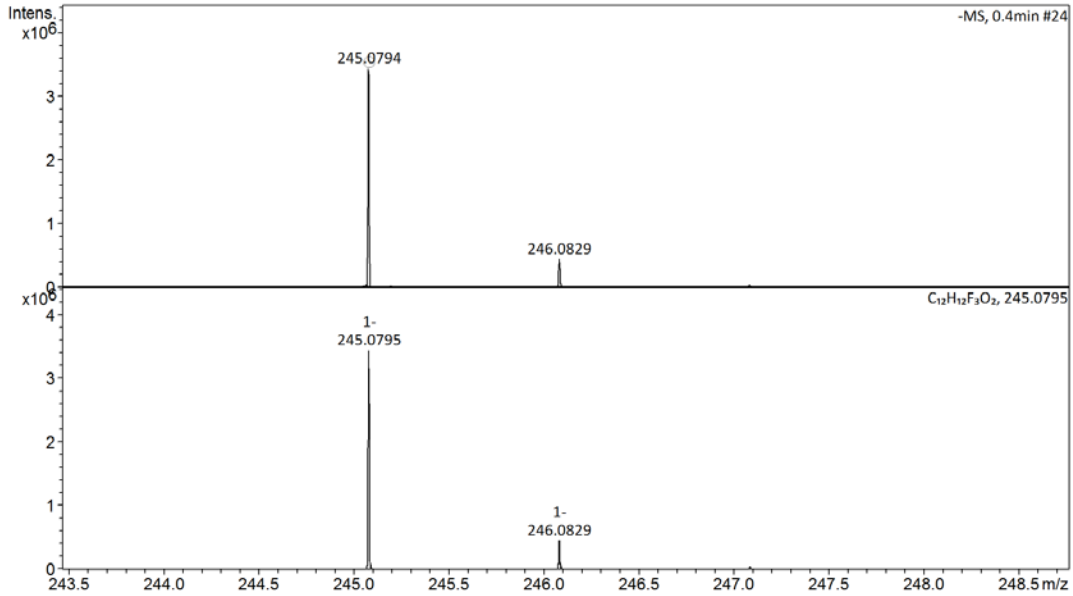

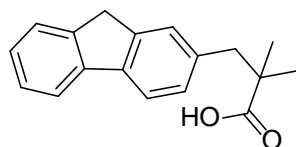

7-54

## Generic Display Report

### Analysis Info

Analysis Name D:\Data\data\202106\swp\HYL-37\_1-D,2\_01\_17301.d  
 Method pq-ms-neg-50-1000.m  
 Sample Name HYL-37  
 Comment

Acquisition Date 6/16/2021 4:21:55 PM

Operator BDAL@DE  
 Instrument impact II

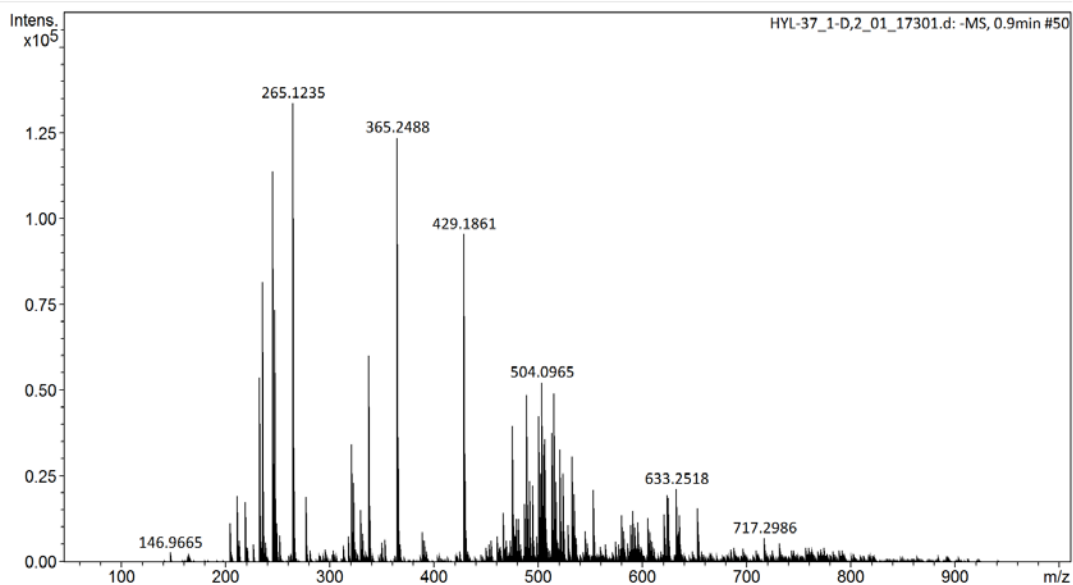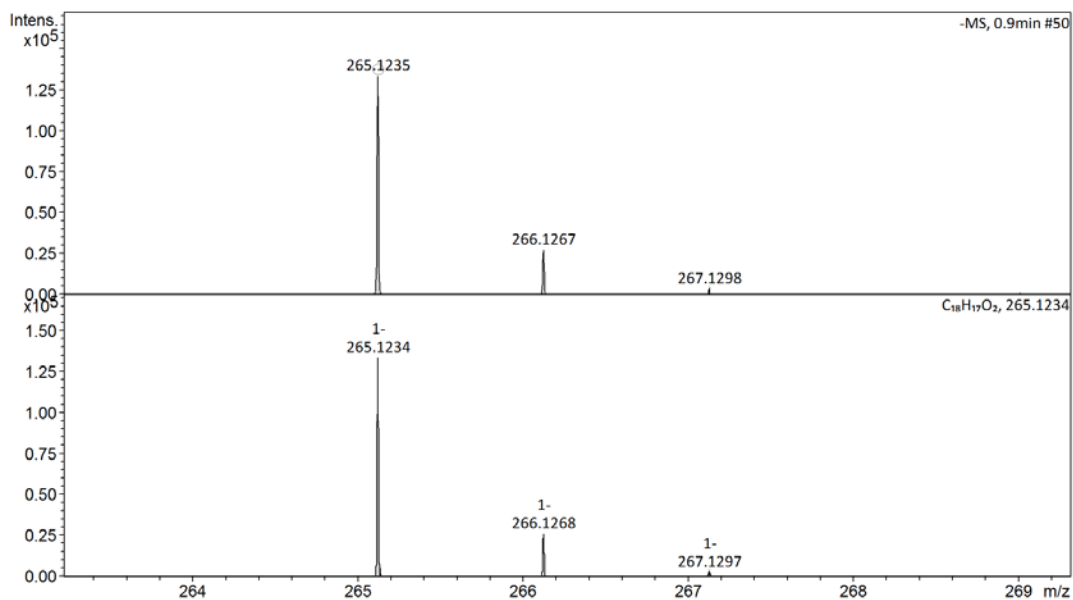

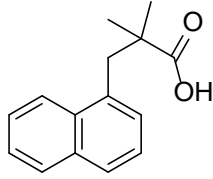

7-55

### Generic Display Report

**Analysis Info**

Analysis Name D:\Data\data\202106\swp\HYL-39\_1-D,3\_01\_17286.d  
Method pq-ms-neg-50-1000.m  
Sample Name HYL-39  
Comment

Acquisition Date 6/16/2021 3:26:29 PM

Operator BDAL@DE  
Instrument impact II

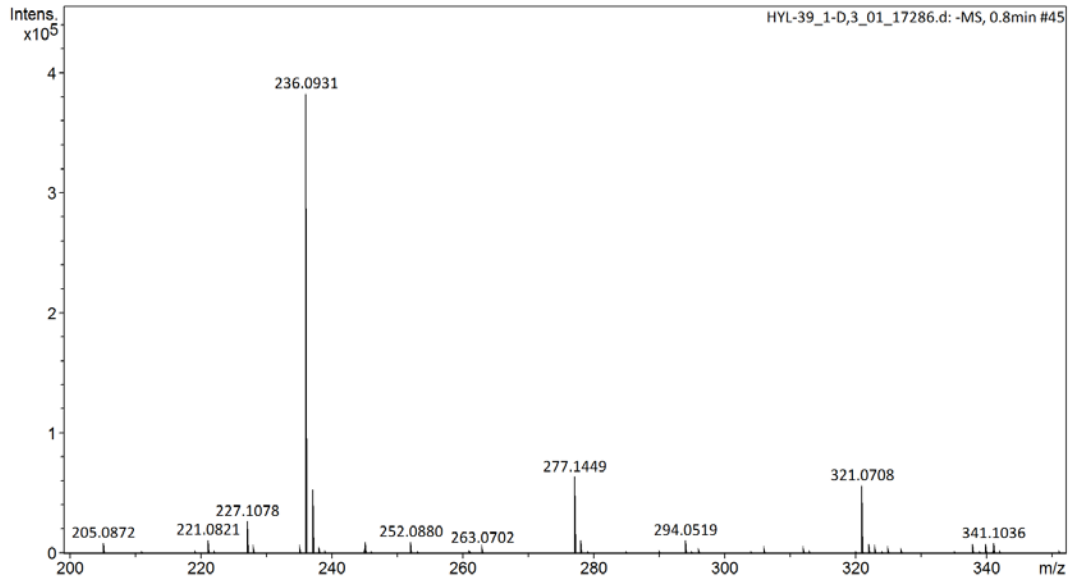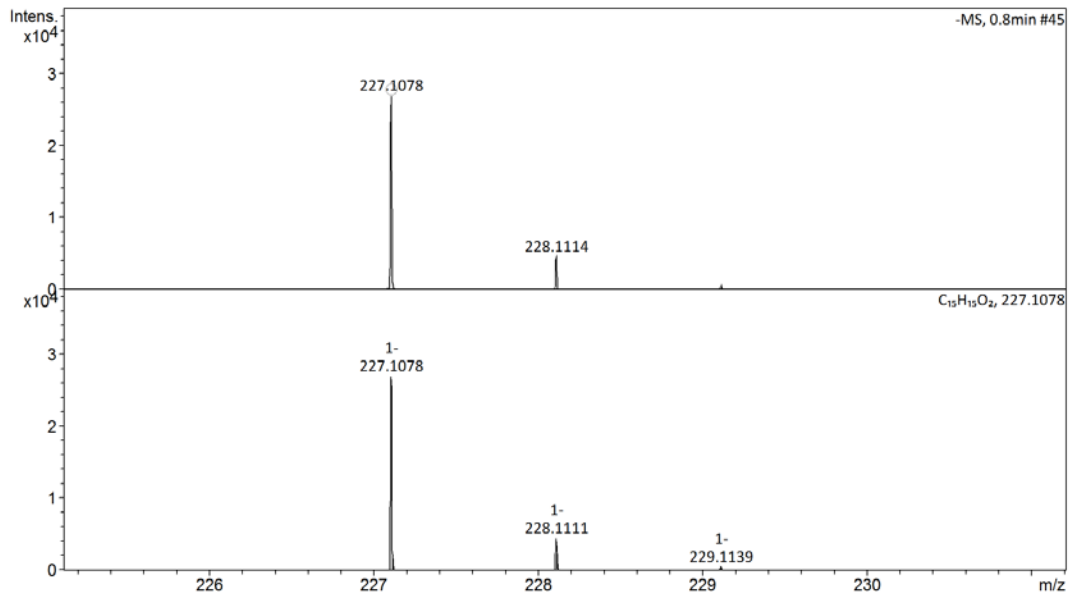

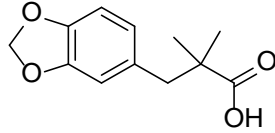

7-56

### Generic Display Report

**Analysis Info**

Analysis Name D:\Data\data\202106\swp\HYL-40\_1-D,4\_01\_17281.d  
Method pq-ms-neg-50-1000.m  
Sample Name HYL-40  
Comment

Acquisition Date 6/16/2021 3:03:41 PM

Operator BDAL@DE  
Instrument impact II

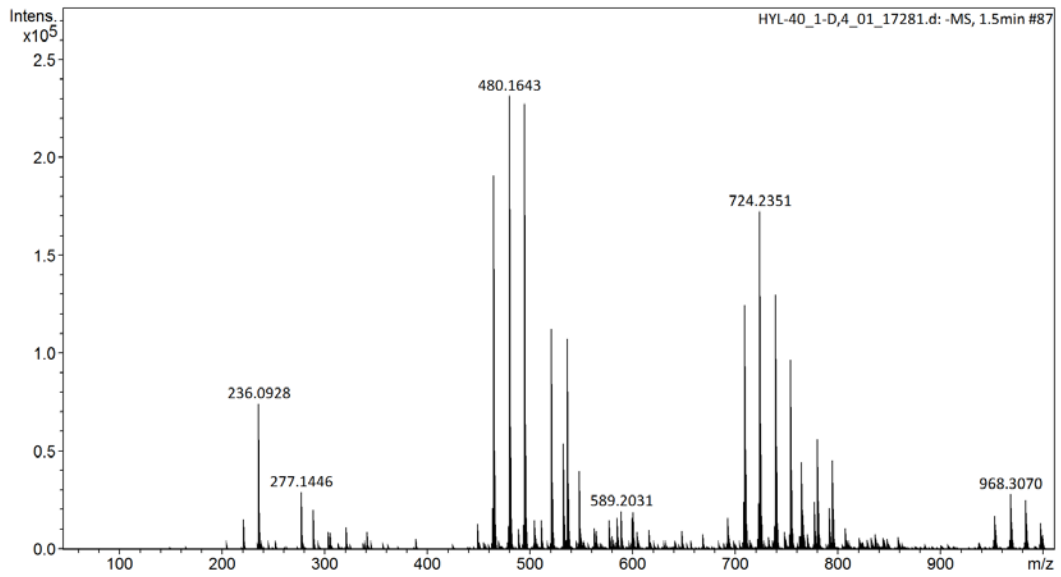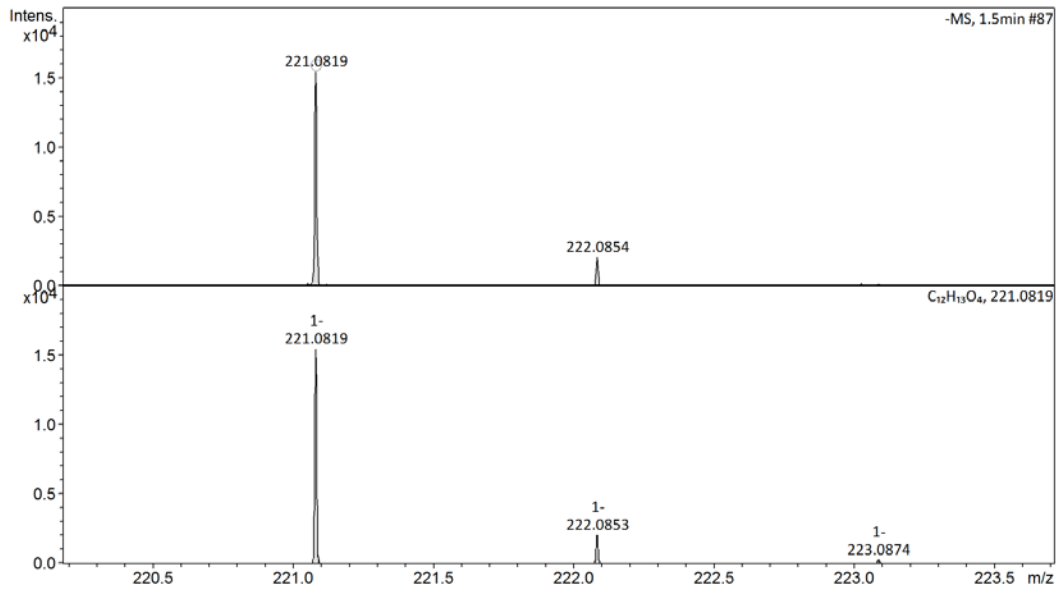



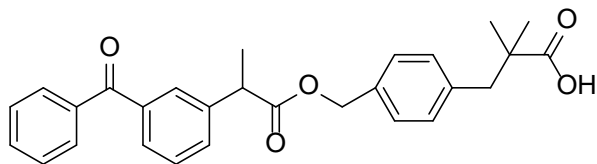

7-58

### Generic Display Report

**Analysis Info**

Analysis Name D:\Data\data\202111\swpl\HYL-I\_1-B,4\_01\_20694.d  
 Method pq-ms-neg-50-1000.m  
 Sample Name HYL-I  
 Comment

Acquisition Date 11/16/2021 12:16:35 PM

Operator BDAL@DE  
 Instrument impact II

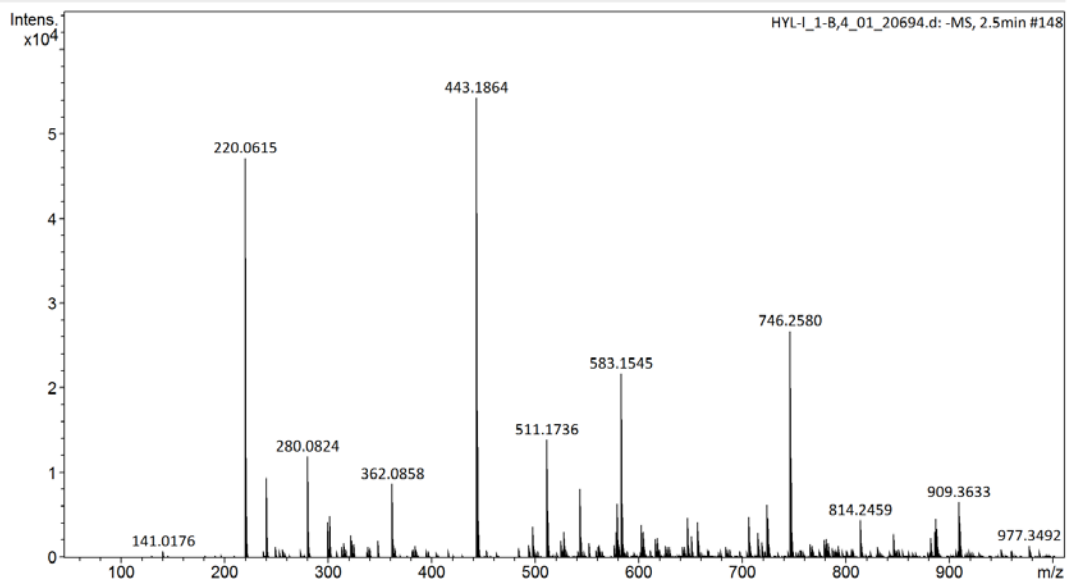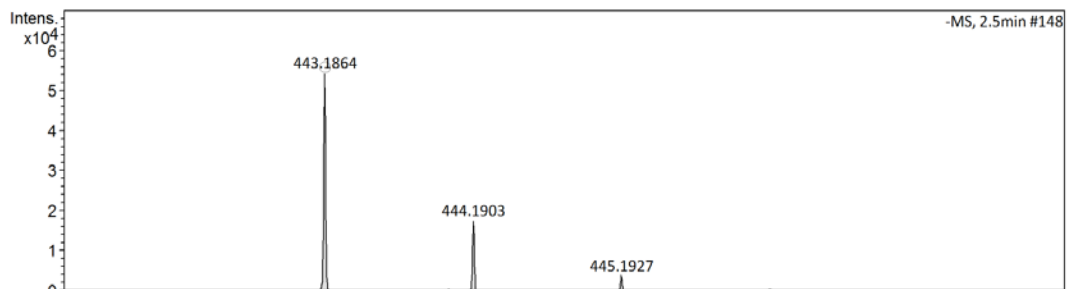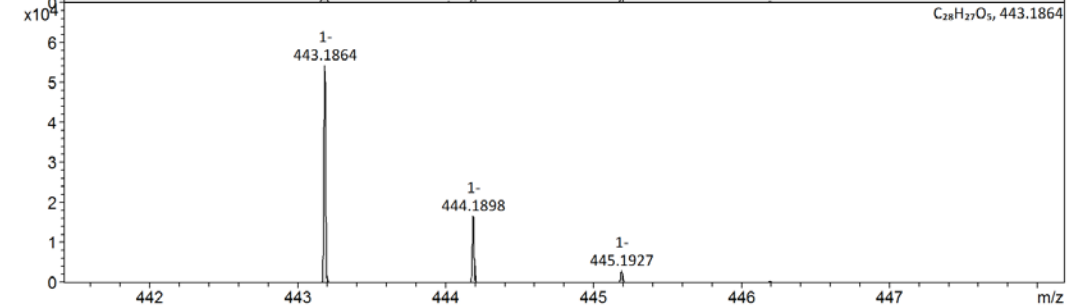

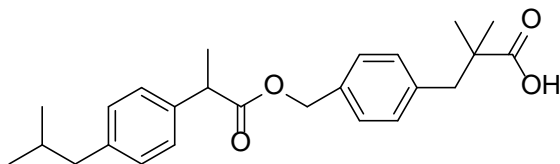

7-59

### Generic Display Report

**Analysis Info**

Analysis Name D:\Data\data\202111\swp\HYL-m\_1-B,5\_01\_20696.d  
 Method pq-ms-neg-50-1000.m  
 Sample Name HYL-m  
 Comment

Acquisition Date 11/16/2021 12:24:48 PM

Operator BDAL@DE  
 Instrument impact II

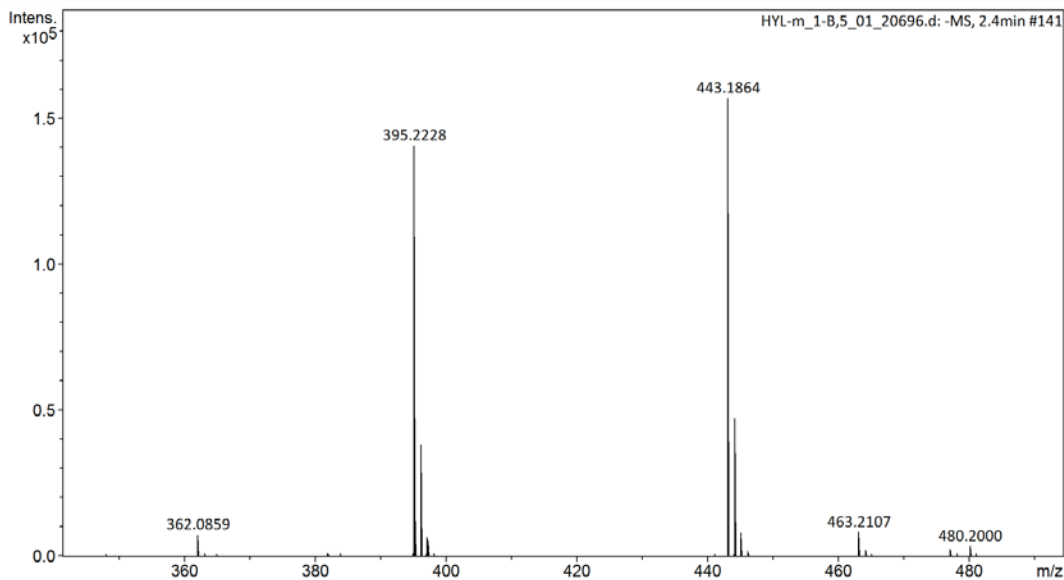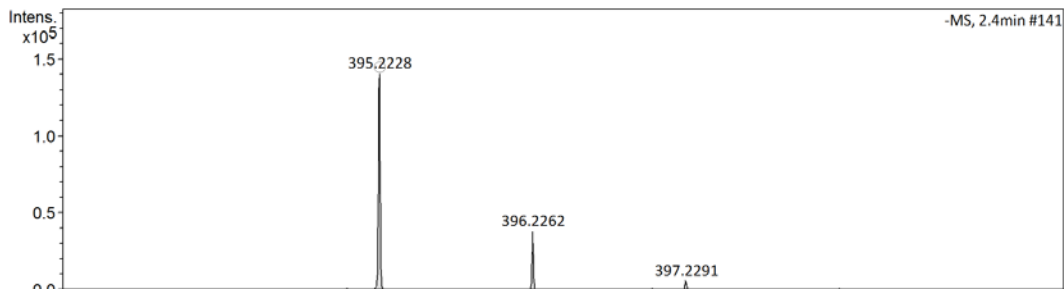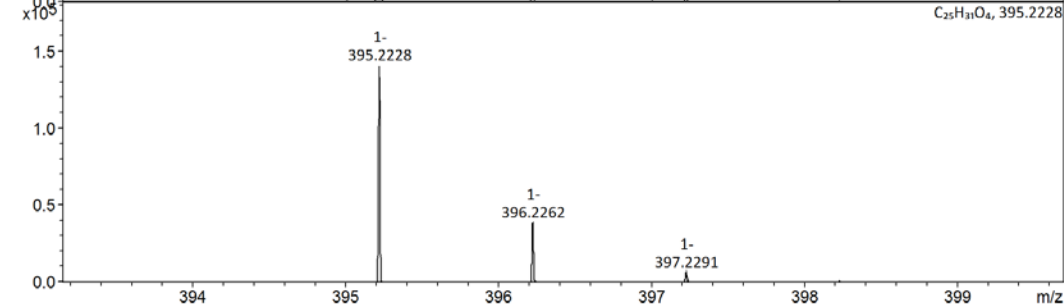

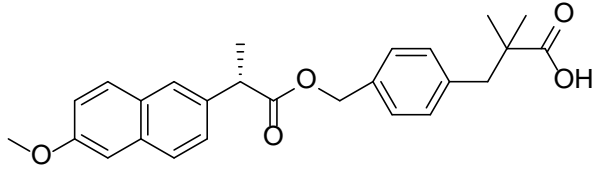

7-60

### Generic Display Report

**Analysis Info**

Analysis Name D:\Data\data\202111\swp\HYL-o\_1-B,7\_01\_20715.d  
 Method pq-ms-neg-50-1000.m  
 Sample Name HYL-o  
 Comment

Acquisition Date 11/16/2021 3:35:33 PM

Operator BDAL@DE  
 Instrument impact II

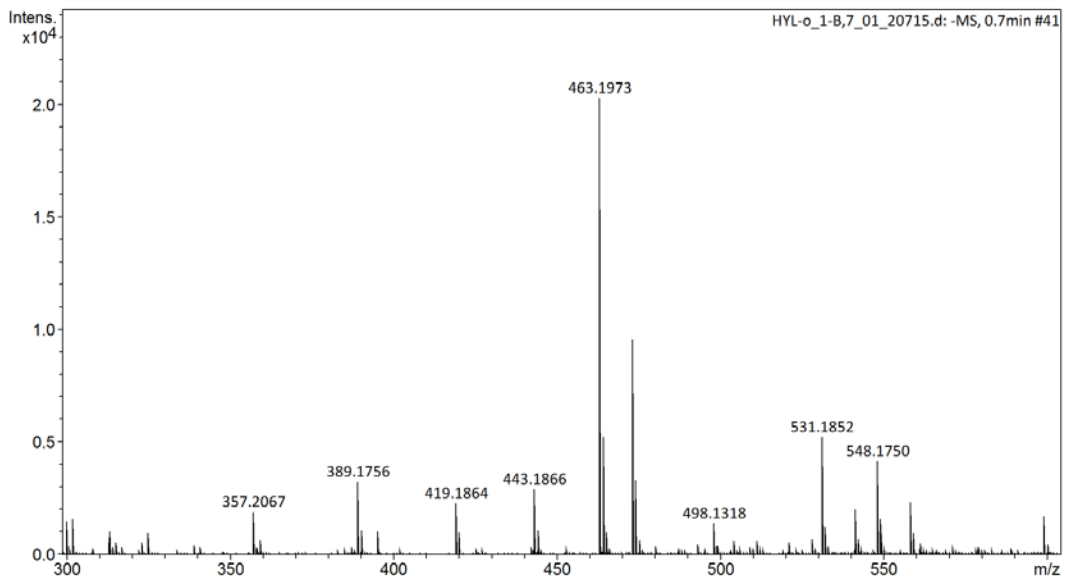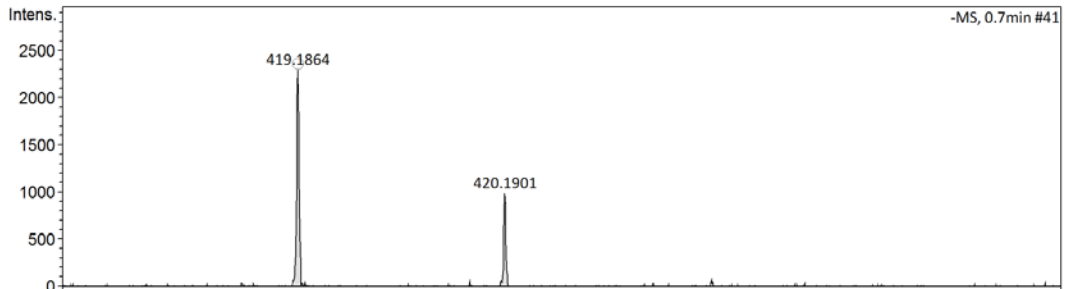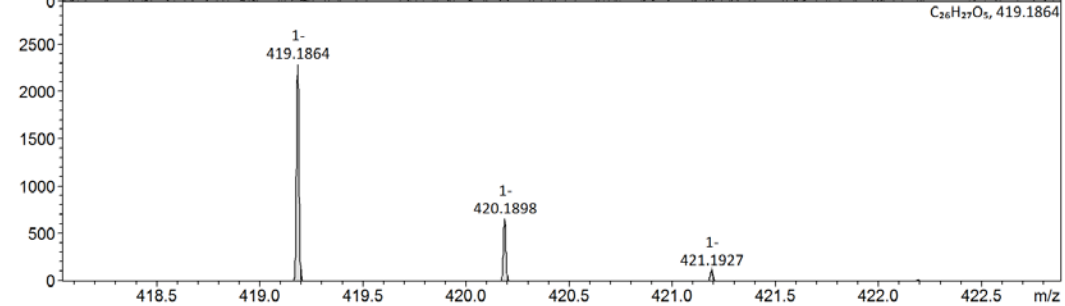

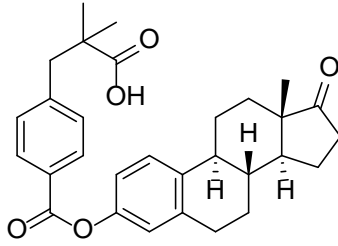

7-61

### Generic Display Report

**Analysis Info**

Analysis Name D:\Data\data\202111\swp\HYL-p\_1-B,8\_01\_20702.d  
 Method pq-ms-neg-50-1000.m  
 Sample Name HYL-p  
 Comment

Acquisition Date 11/16/2021 12:44:58 PM

Operator BDAL@DE  
 Instrument impact II

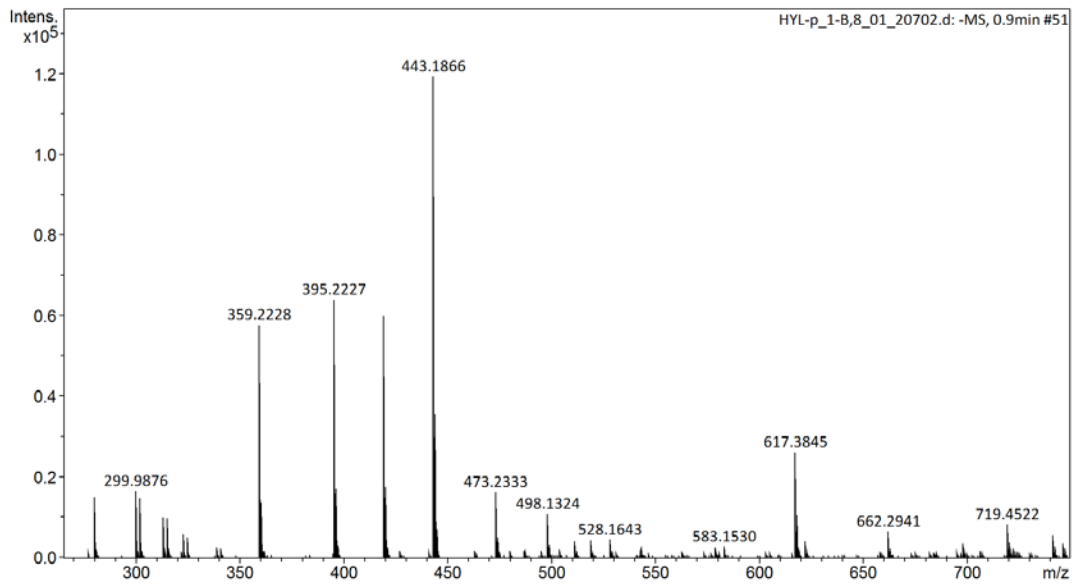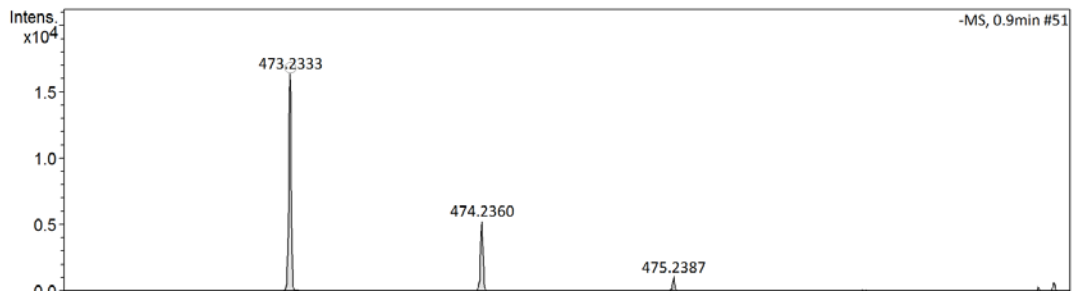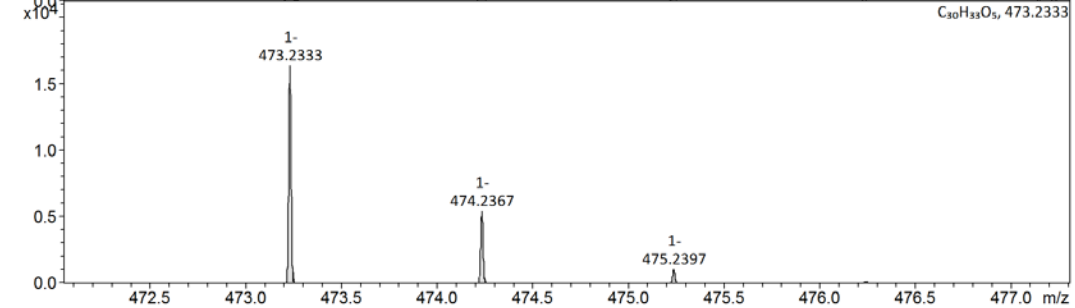

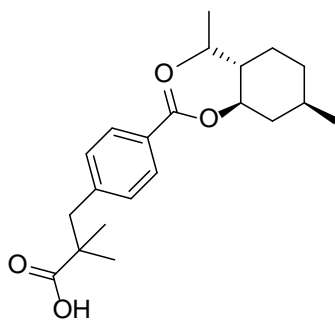

6-62

### Generic Display Report

**Analysis Info**

Analysis Name D:\Data\data\202111\swp\HYL-n\_1-B,6\_01\_20698.d  
 Method pq-ms-neg-50-1000.m  
 Sample Name HYL-n  
 Comment

Acquisition Date 11/16/2021 12:31:31 PM

Operator BDAL@DE  
 Instrument impact II

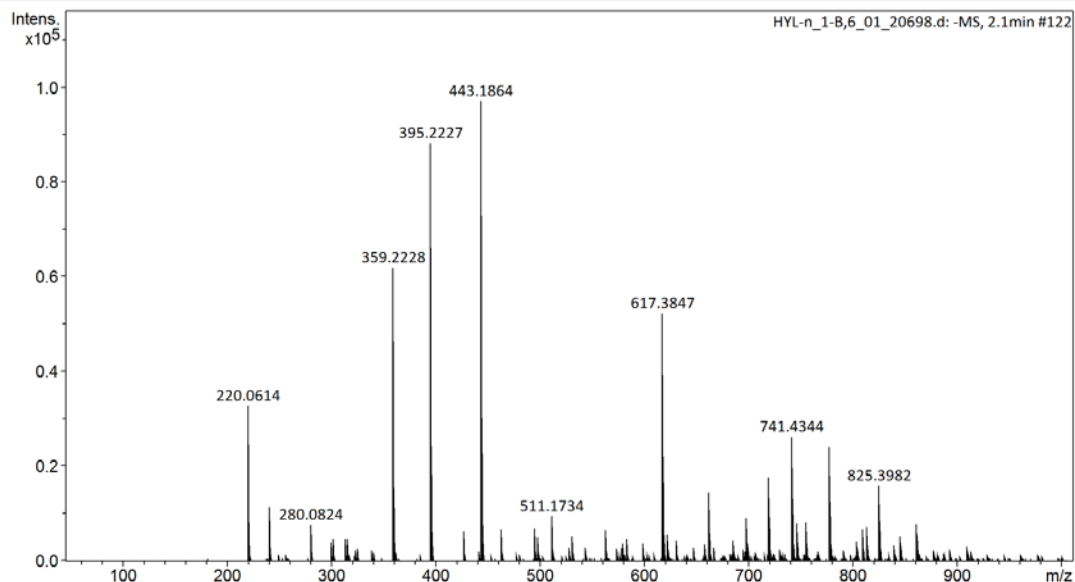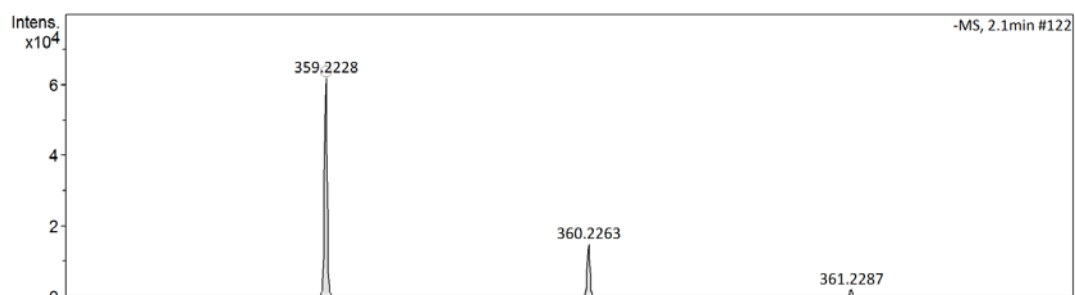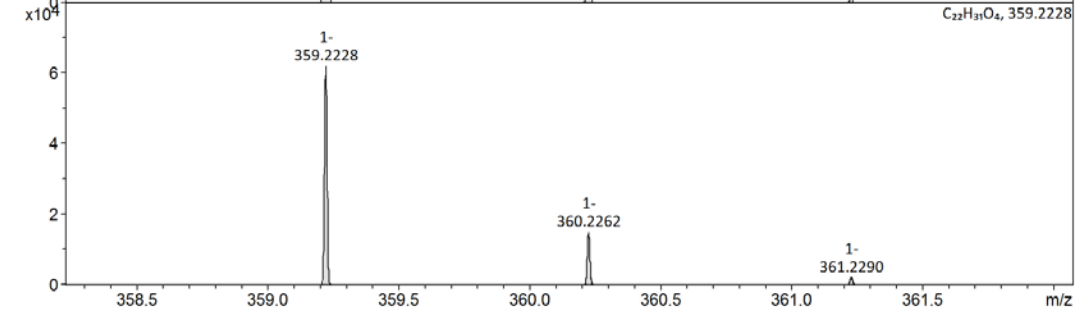

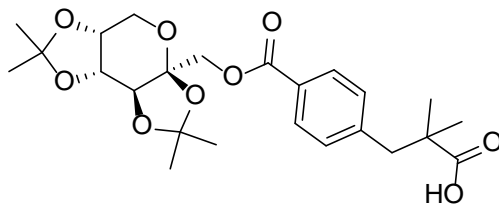

7-63

### Generic Display Report

**Analysis Info**

Analysis Name D:\Data\data\202111\swp\HYL-s\_1-C,3\_01\_20708.d  
 Method pq-ms-neg-50-1000.m  
 Sample Name HYL-s  
 Comment

Acquisition Date 11/16/2021 1:05:08 PM

Operator BDAL@DE  
 Instrument impact II

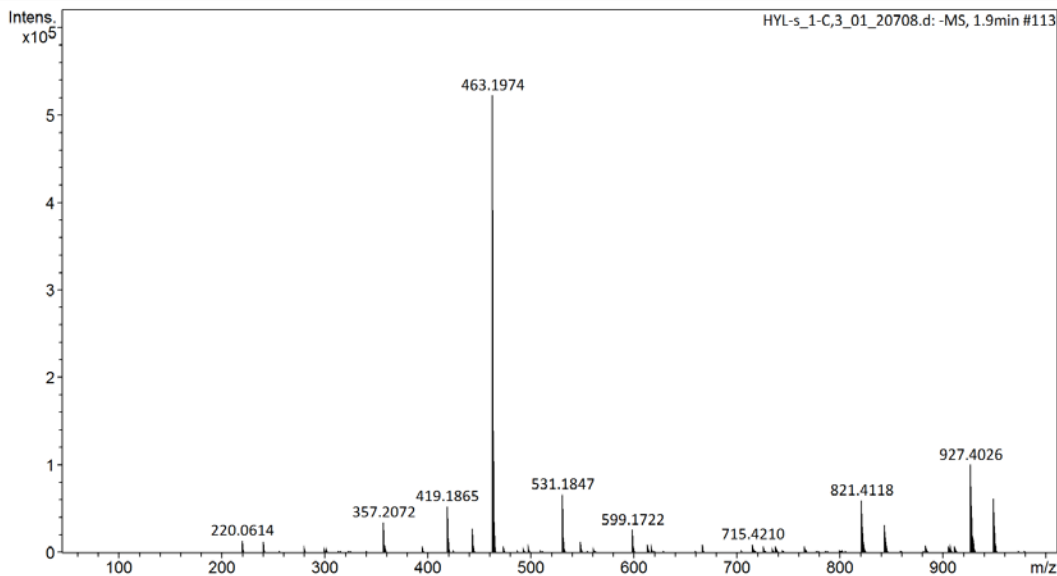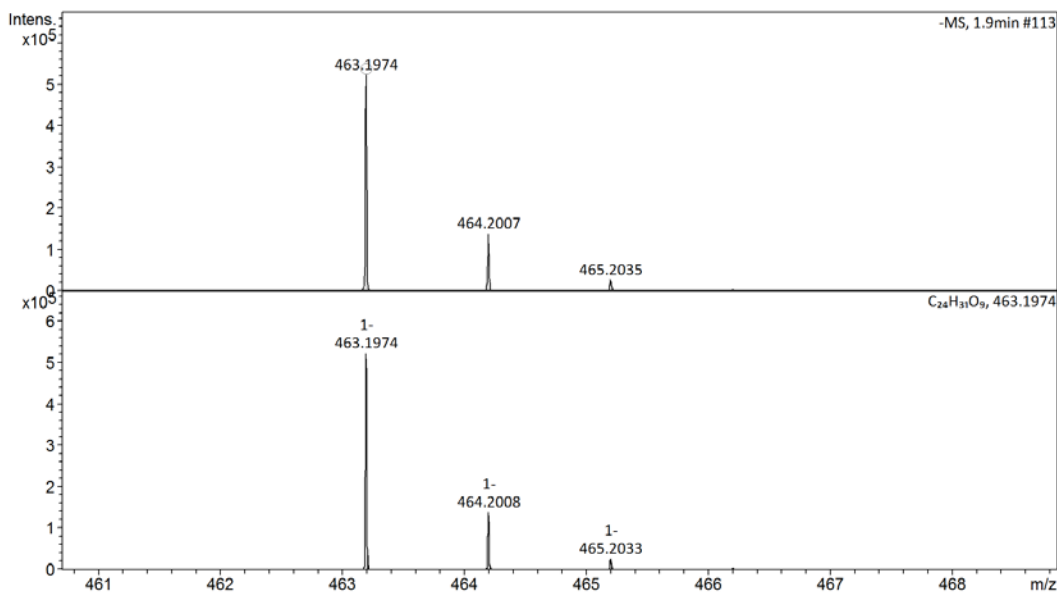

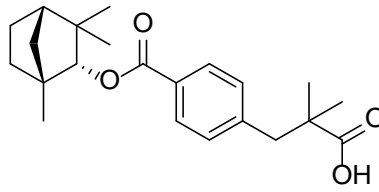

7-64

### Generic Display Report

**Analysis Info**

Analysis Name D:\Data\data\202111\swp\HYL-q\_1-C,1\_01\_20704.d  
 Method pq-ms-neg-50-1000.m  
 Sample Name HYL-q  
 Comment

Acquisition Date 11/16/2021 12:51:42 PM

Operator BDAL@DE  
 Instrument impact II

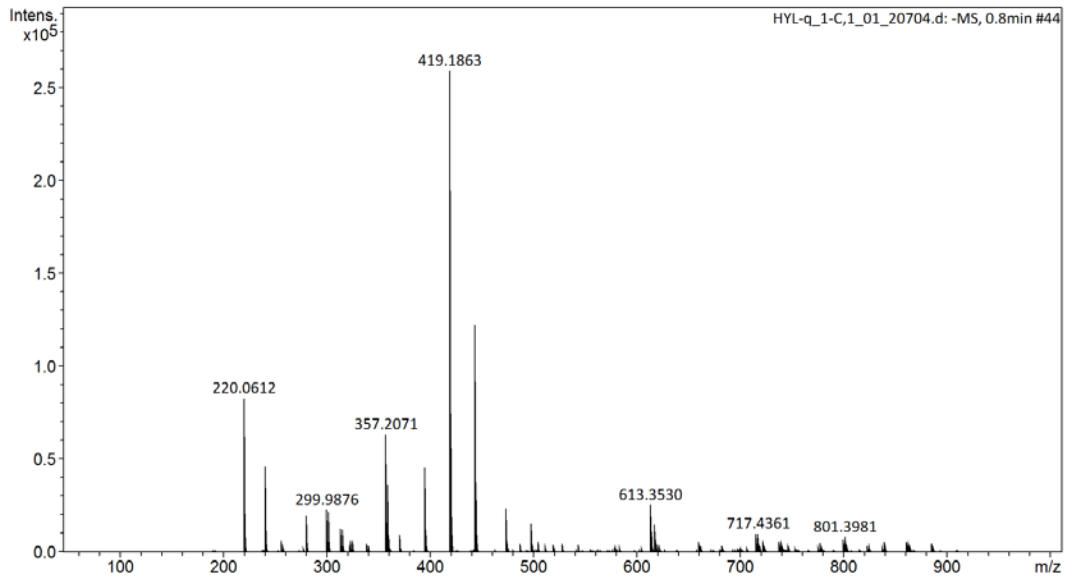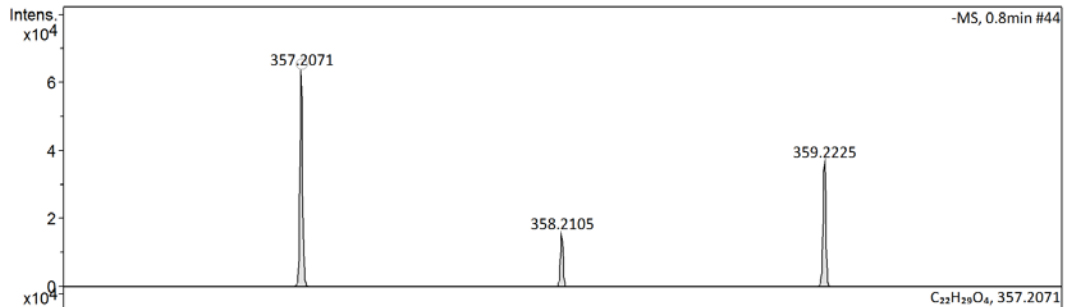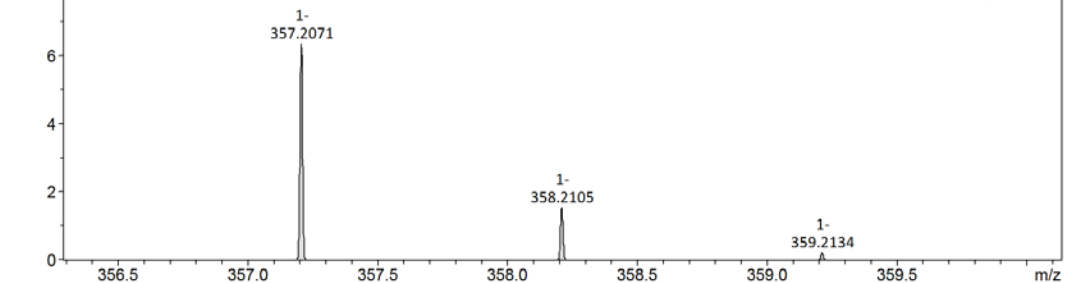

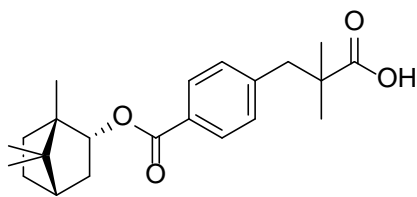

7-65

### Generic Display Report

**Analysis Info**

Analysis Name D:\Data\data\202111\swp\HYL-r\_1-C,2\_01\_20706.d  
 Method pq-ms-neg-50-1000.m  
 Sample Name HYL-r  
 Comment

Acquisition Date 11/16/2021 12:58:26 PM

Operator BDAL@DE  
 Instrument impact II

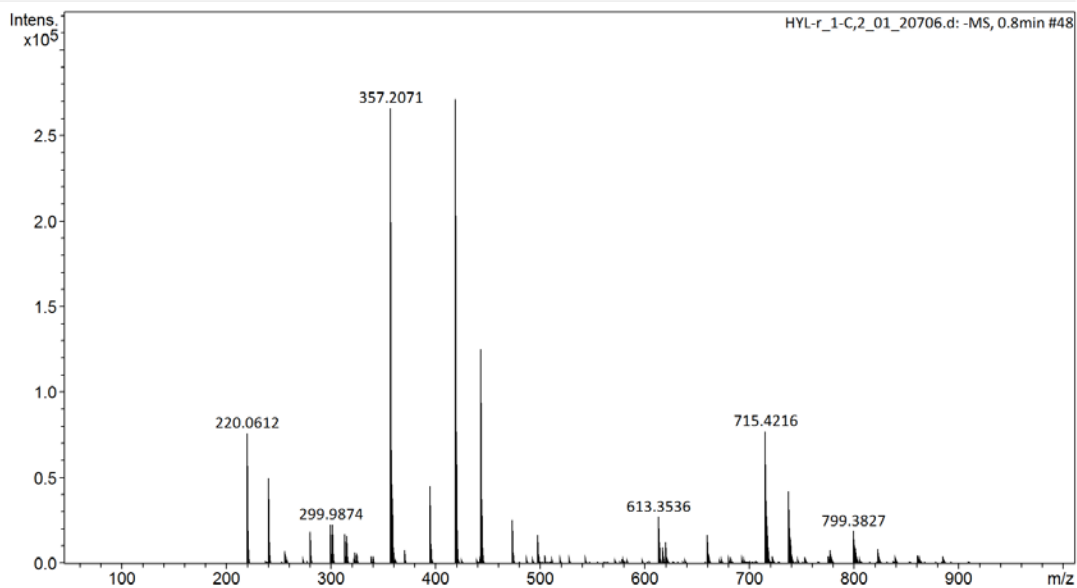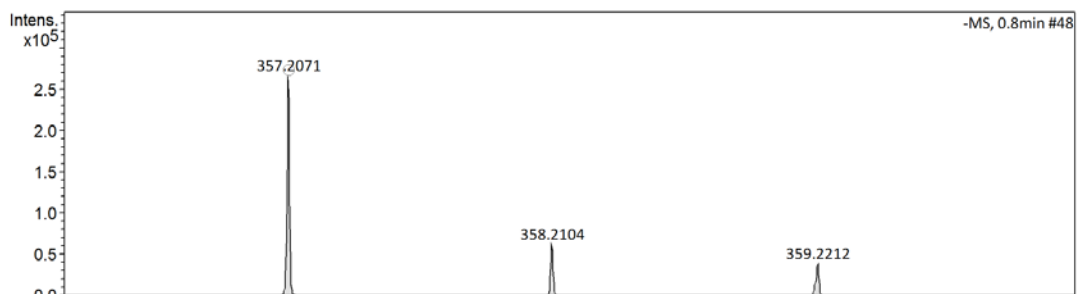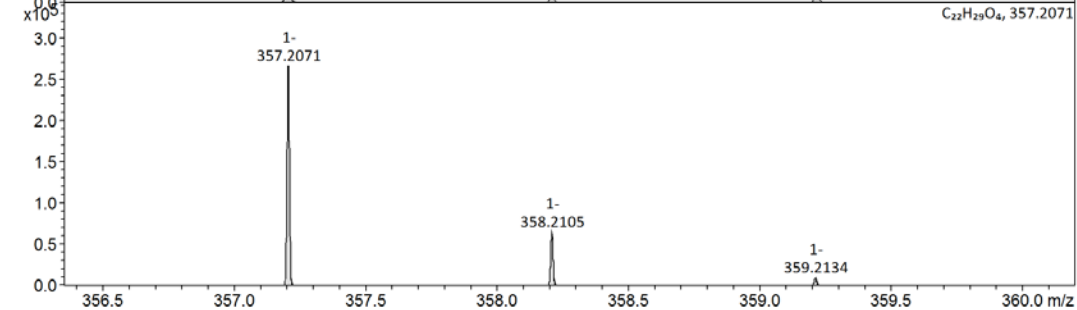



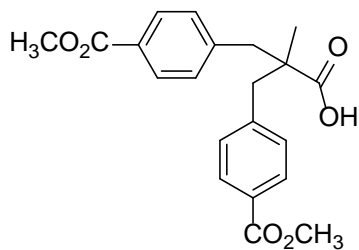

8-1

### Generic Display Report

**Analysis Info**

Analysis Name D:\Data\data\202106\swp\HYL-47\_1-B,2\_01\_17790.d  
 Method pq-ms-neg-50-1000.m  
 Sample Name HYL-47  
 Comment

Acquisition Date 6/29/2021 3:54:33 PM

Operator BDAL@DE  
 Instrument impact II

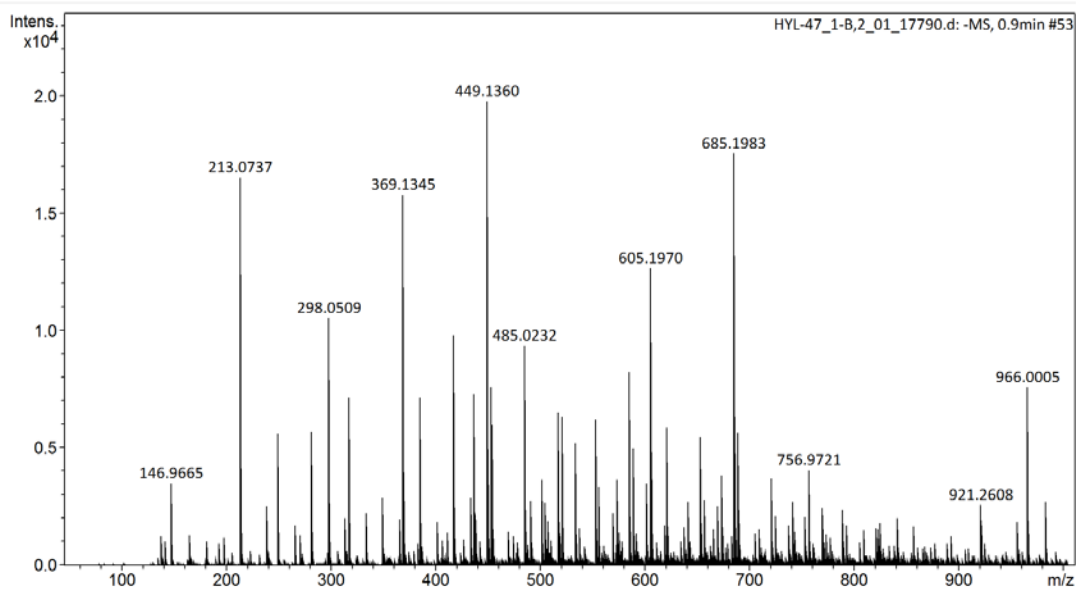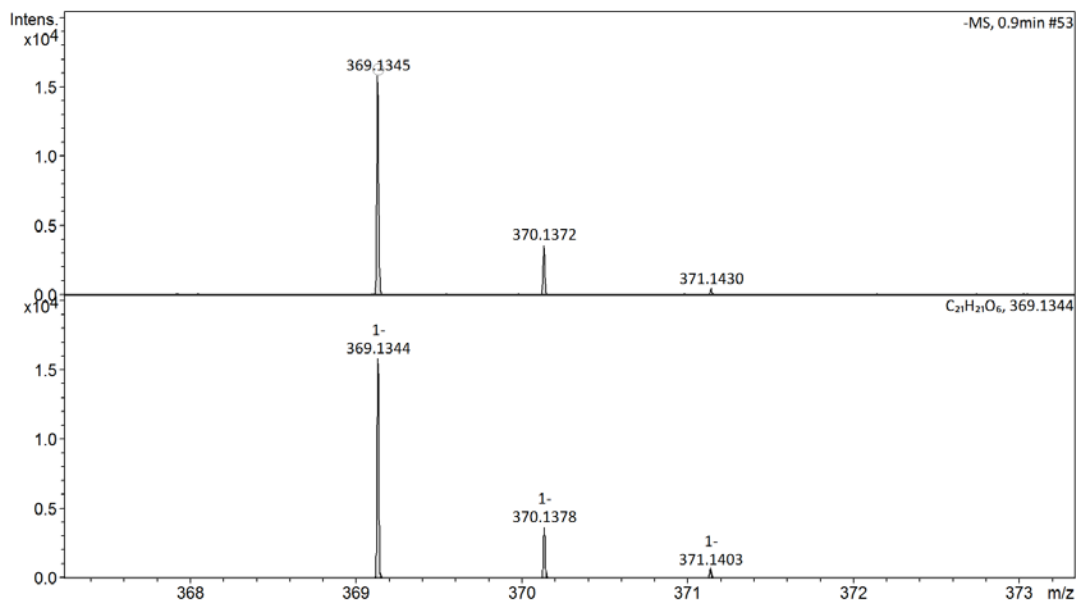

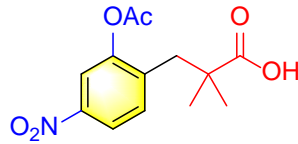

**esterase sensitive-10**

**Generic Display Report**

**Analysis Info**

Analysis Name D:\Data\data\202111\swp\HYL-j\_1-B,2\_01\_20690.d  
 Method pq-ms-neg-50-1000.m  
 Sample Name HYL-j  
 Comment

Acquisition Date 11/16/2021 11:56:02 AM  
 Operator BDAL@DE  
 Instrument impact II

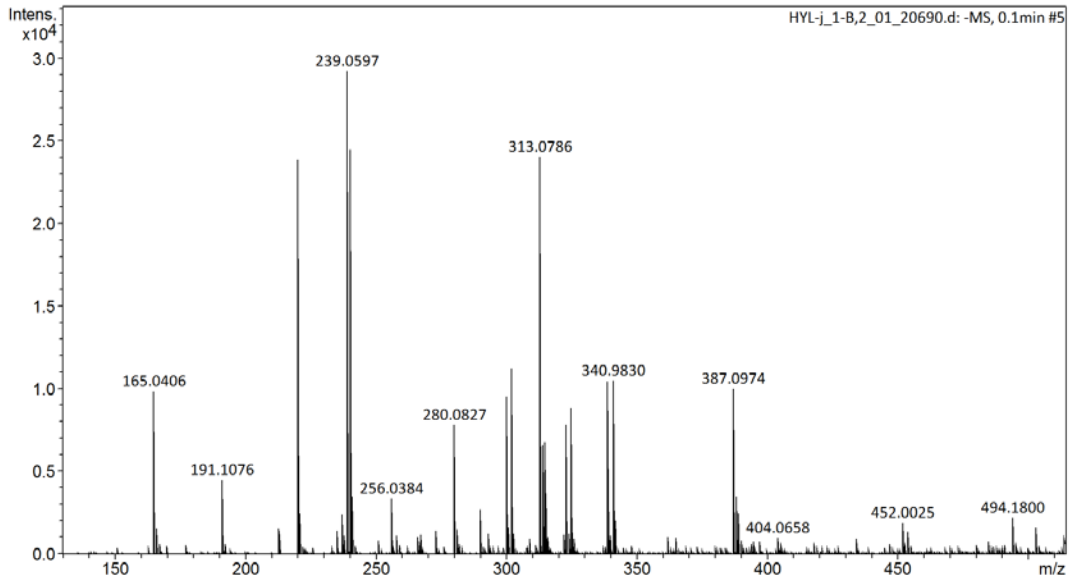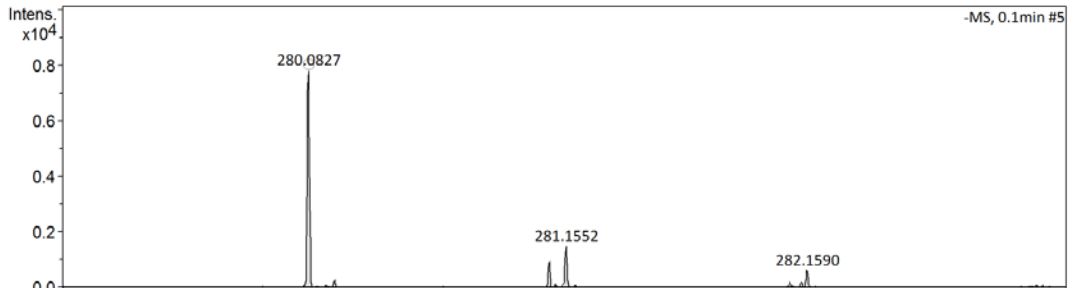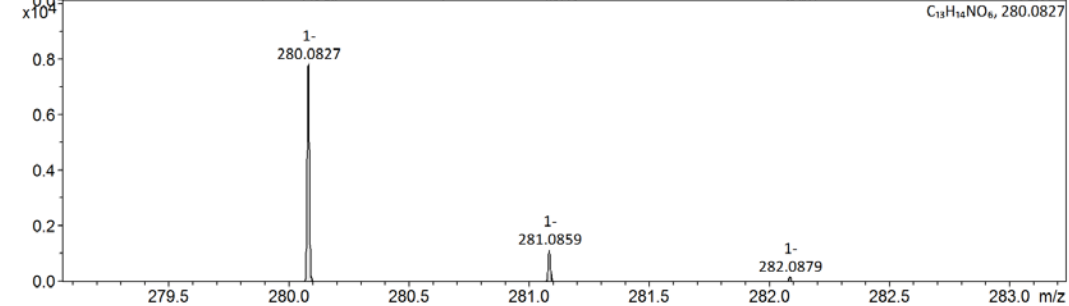

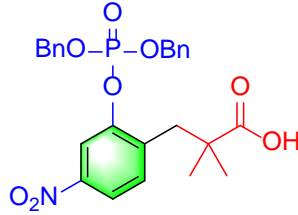

**phosphatase sensitive-11**

**Generic Display Report**

**Analysis Info**

Analysis Name D:\Data\data\202111\swp\HYL-k\_1-B,3\_01\_20692.d  
 Method pq-ms-neg-50-1000.m  
 Sample Name HYL-k  
 Comment

Acquisition Date 11/16/2021 12:02:45 PM

Operator BDAL@DE  
 Instrument impact II

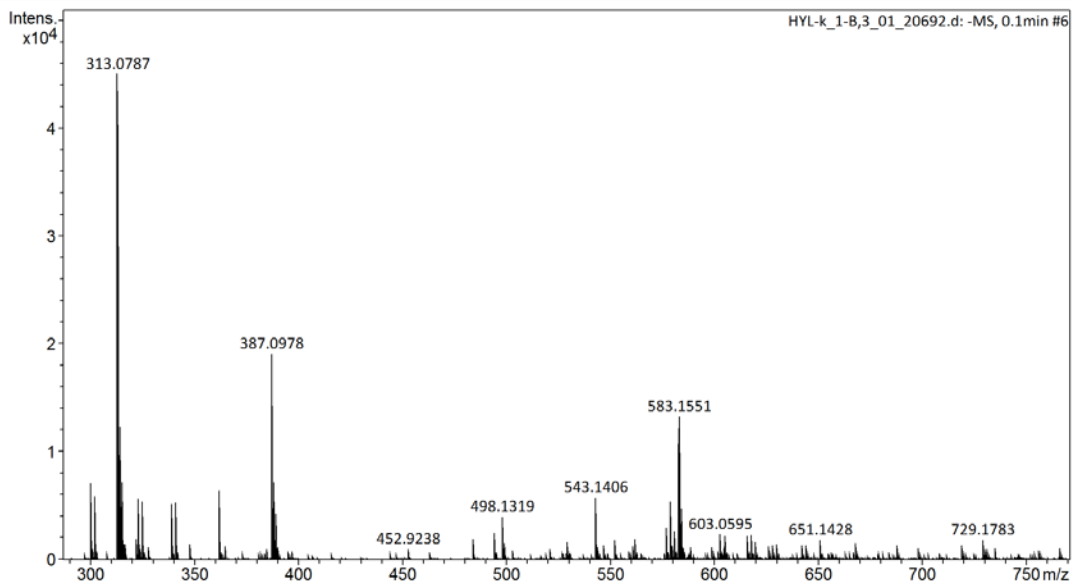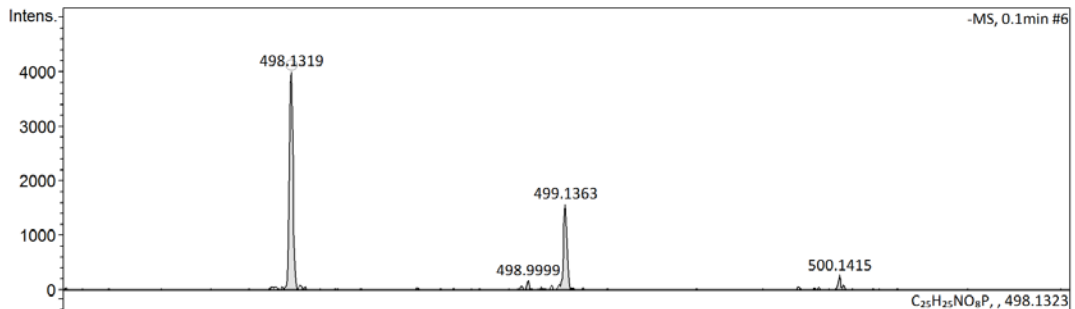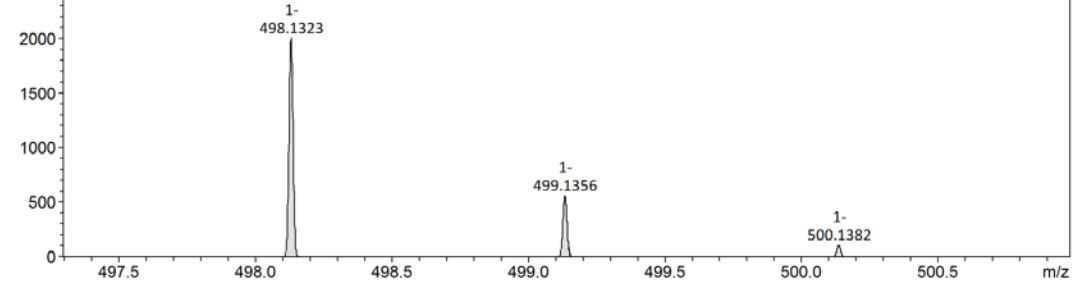

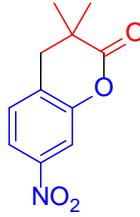

9

National Center for Organic Mass Spectrometry in Shanghai  
 Shanghai Institute of Organic Chemistry  
 Chinese Academy of Sciences  
 High Resolution MS DATA REPORT

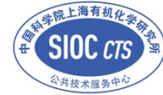

Instrument: Thermo-Fisher Scientific LTQ-FTICR-MS

Card Serial Number: D20220424

Sample Serial Number: HYL(I)

Operator: DONG Date: 2021/12/23

Operation Mode: DART POSITIVE

Elemental composition search on mass 222.0761

m/z = 217.0761-227.0761

| m/z      | Theo. Mass | Delta (ppm) | RDB equiv. | Composition                                                                 |
|----------|------------|-------------|------------|-----------------------------------------------------------------------------|
| 222.0761 | 222.0761   | 0.07        | 6.5        | C <sub>11</sub> H <sub>12</sub> O <sub>4</sub> N                            |
|          | 222.0759   | 0.79        | -4.5       | C <sub>3</sub> H <sub>13</sub> O <sub>4</sub> NF <sub>5</sub>               |
|          | 222.0759   | 0.97        | 3.0        | C <sub>6</sub> H <sub>11</sub> O <sub>4</sub> N <sub>4</sub> F              |
|          | 222.0770   | -4.18       | -1.0       | C <sub>3</sub> H <sub>12</sub> O <sub>5</sub> N <sub>4</sub> F <sub>2</sub> |

D20220424 #21 RT: 0.3424 AV: 1 NL: 7.83E5  
 T: FTMS + p NSI Full ms [50.00-800.00]

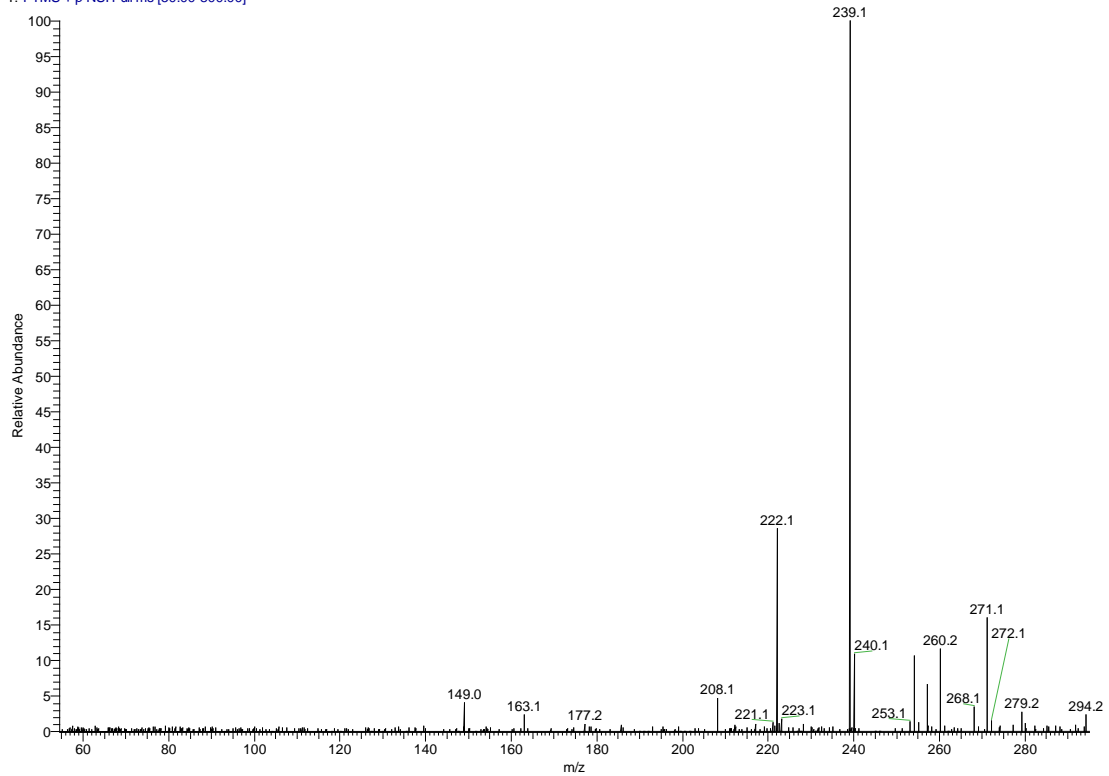

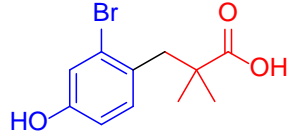

12

## Display Report

### Analysis Info

Analysis Name D:\Data\data\202112\swp\HYLD\_1-B,2\_01\_21139.d  
 Method pq-ms-neg-50-1000.m  
 Sample Name HYLD  
 Comment

Acquisition Date 12/15/2021 12:07:09 PM

Operator BDAL@DE  
 Instrument impact II 1825265.10133

### Acquisition Parameter

|             |          |                      |          |                  |           |
|-------------|----------|----------------------|----------|------------------|-----------|
| Source Type | ESI      | Ion Polarity         | Negative | Set Nebulizer    | 2.0 Bar   |
| Focus       | Active   | Set Capillary        | 3300 V   | Set Dry Heater   | 200 °C    |
| Scan Begin  | 50 m/z   | Set End Plate Offset | -500 V   | Set Dry Gas      | 8.0 l/min |
| Scan End    | 1000 m/z | Set Charging Voltage | 2000 V   | Set Divert Valve | Waste     |
|             |          | Set Corona           | 0 nA     | Set APCI Heater  | 0 °C      |

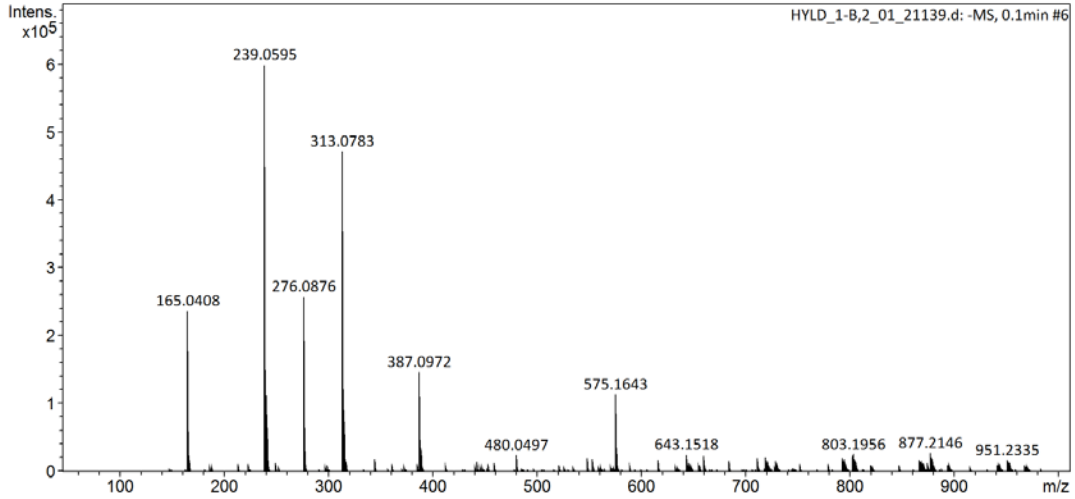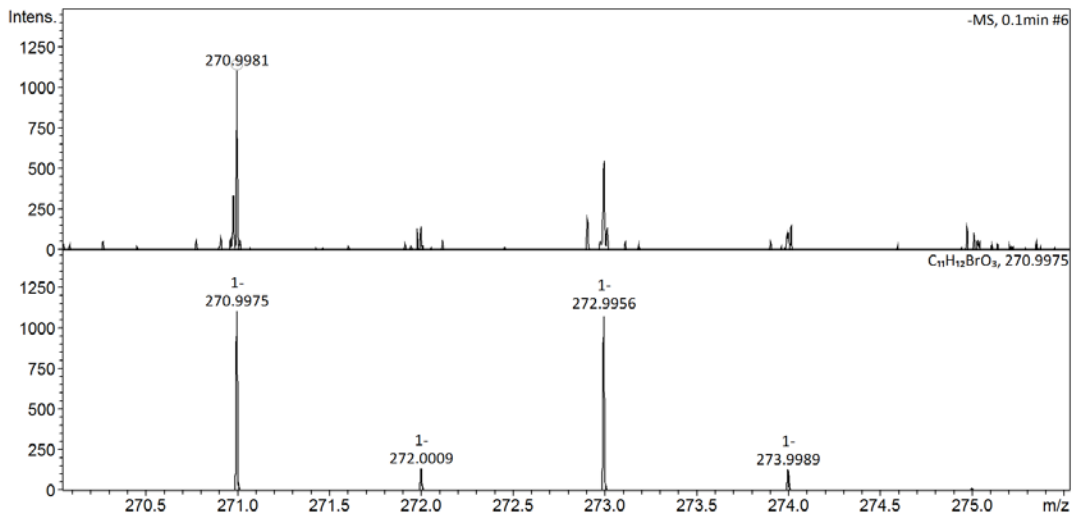

HYLD\_1-B,2\_01\_21139.d

Bruker Compass DataAnalysis 4.3

printed: 12/15/2021 12:10:27 PM

by: BDAL@DE

Page 1 of 1

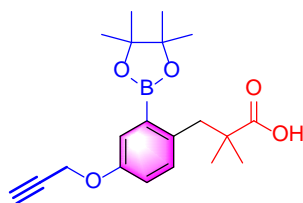

## ROS sensitive-13

### Display Report

#### Analysis Info

Analysis Name D:\Data\data\202112\swp\HVLB\_1-A,1\_01\_21133.d  
 Method pq-ms-neg-50-1000.m  
 Sample Name HVLB  
 Comment

Acquisition Date 12/15/2021 11:40:23 AM

Operator BDAL@DE  
 Instrument impact II 1825265.10133

#### Acquisition Parameter

|             |          |                      |          |                  |           |
|-------------|----------|----------------------|----------|------------------|-----------|
| Source Type | ESI      | Ion Polarity         | Negative | Set Nebulizer    | 2.0 Bar   |
| Focus       | Active   | Set Capillary        | 3300 V   | Set Dry Heater   | 200 °C    |
| Scan Begin  | 50 m/z   | Set End Plate Offset | -500 V   | Set Dry Gas      | 8.0 l/min |
| Scan End    | 1000 m/z | Set Charging Voltage | 2000 V   | Set Divert Valve | Waste     |
|             |          | Set Corona           | 0 nA     | Set APCI Heater  | 0 °C      |

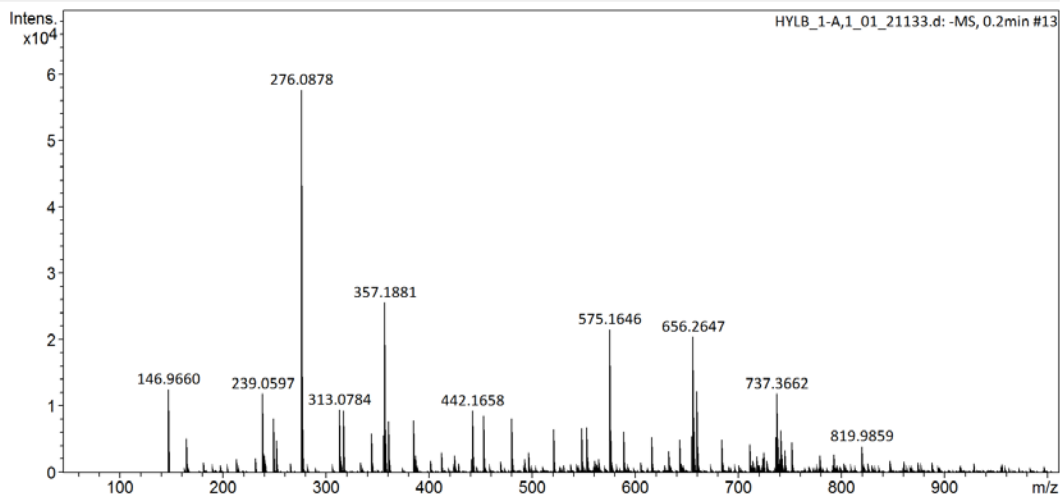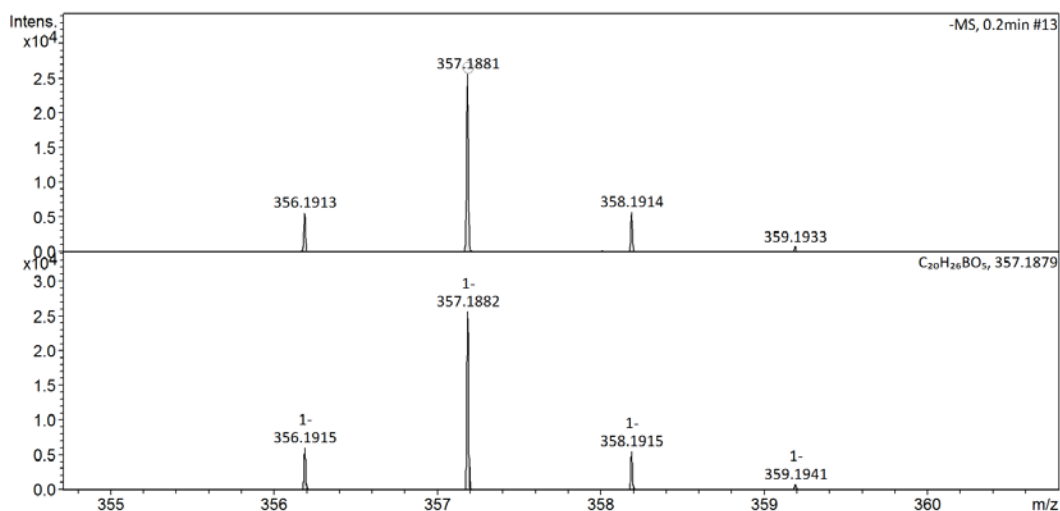

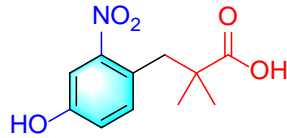

14

## Display Report

### Analysis Info

Analysis Name D:\Data\data\202112\swp\HYLC\_1-A,1\_01\_21135.d  
 Method pq-ms-neg-50-1000.m  
 Sample Name HYLC  
 Comment

Acquisition Date 12/15/2021 11:50:13 AM

Operator BDAL@DE  
 Instrument impact II 1825265.10133

### Acquisition Parameter

|             |          |                      |          |                  |           |
|-------------|----------|----------------------|----------|------------------|-----------|
| Source Type | ESI      | Ion Polarity         | Negative | Set Nebulizer    | 2.0 Bar   |
| Focus       | Active   | Set Capillary        | 3300 V   | Set Dry Heater   | 200 °C    |
| Scan Begin  | 50 m/z   | Set End Plate Offset | -500 V   | Set Dry Gas      | 8.0 l/min |
| Scan End    | 1000 m/z | Set Charging Voltage | 2000 V   | Set Divert Valve | Waste     |
|             |          | Set Corona           | 0 nA     | Set APCI Heater  | 0 °C      |

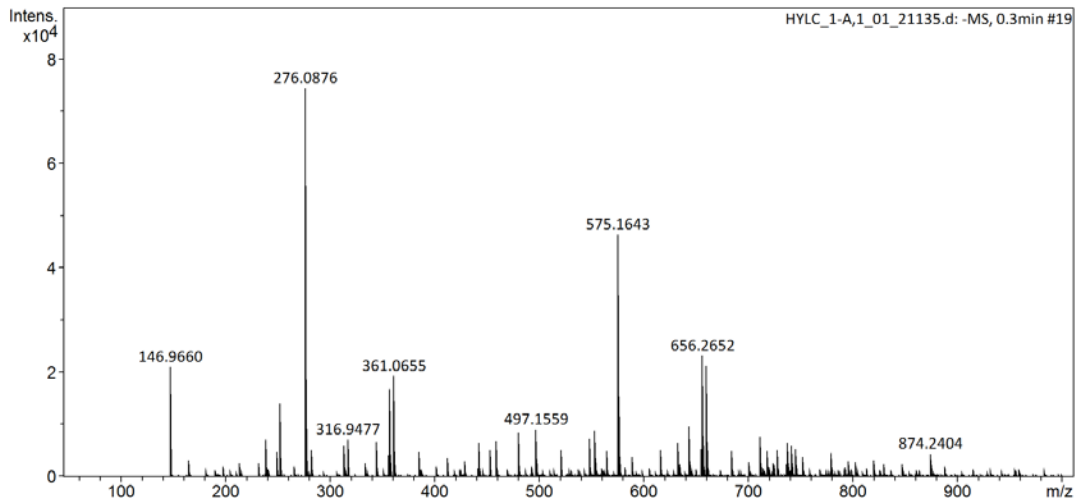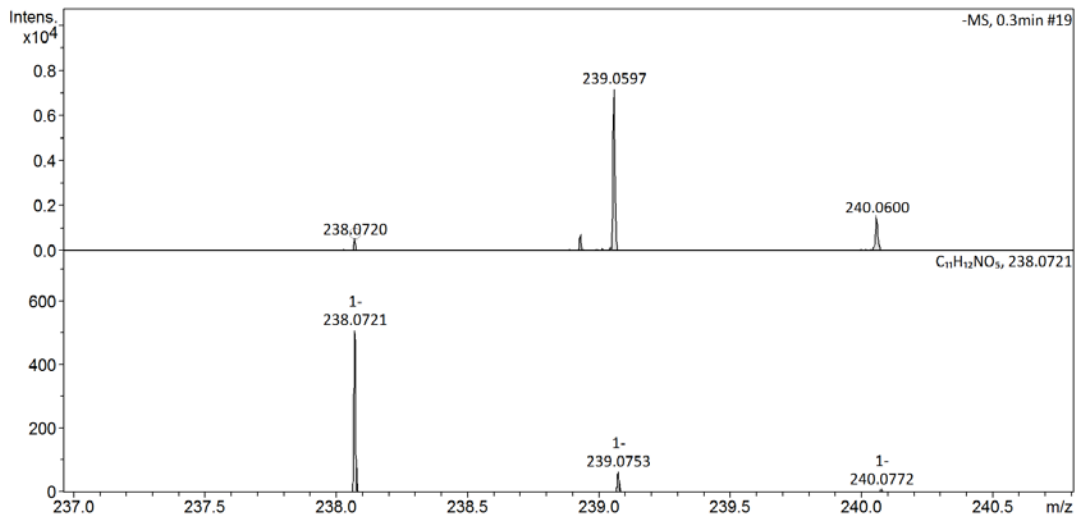

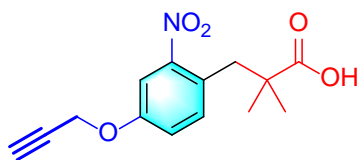

**hypoxia sensitive-15**

**Display Report**

**Analysis Info**

Analysis Name D:\Data\data\202112\swp\HYLA\_1-A,7\_01\_21127.d  
 Method pq-ms-neg-50-1000.m  
 Sample Name HYLA  
 Comment

Acquisition Date 12/15/2021 11:15:59 AM

Operator BDAL@DE  
 Instrument impact II 1825265.10133

**Acquisition Parameter**

|             |          |                      |          |                  |           |
|-------------|----------|----------------------|----------|------------------|-----------|
| Source Type | ESI      | Ion Polarity         | Negative | Set Nebulizer    | 2.0 Bar   |
| Focus       | Active   | Set Capillary        | 3300 V   | Set Dry Heater   | 200 °C    |
| Scan Begin  | 50 m/z   | Set End Plate Offset | -500 V   | Set Dry Gas      | 8.0 l/min |
| Scan End    | 1000 m/z | Set Charging Voltage | 2000 V   | Set Divert Valve | Waste     |
|             |          | Set Corona           | 0 nA     | Set APCI Heater  | 0 °C      |

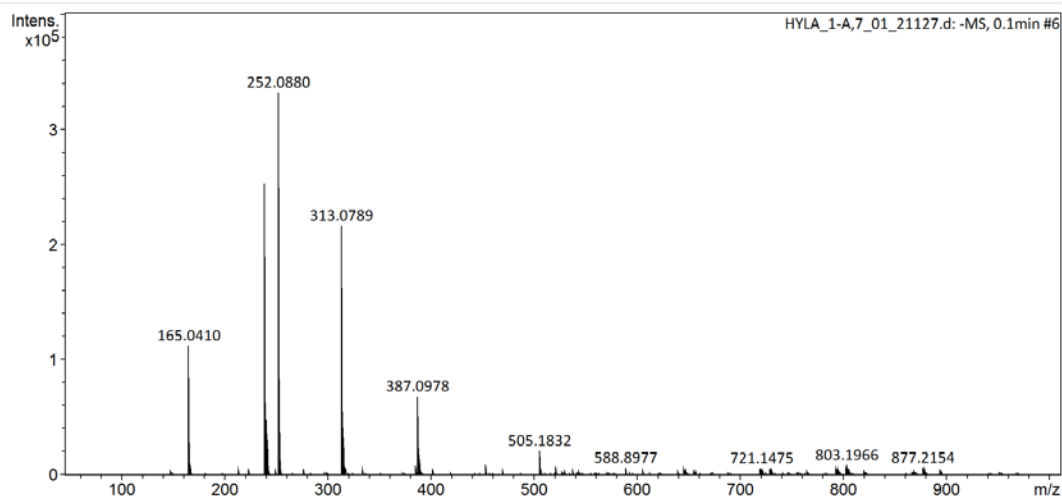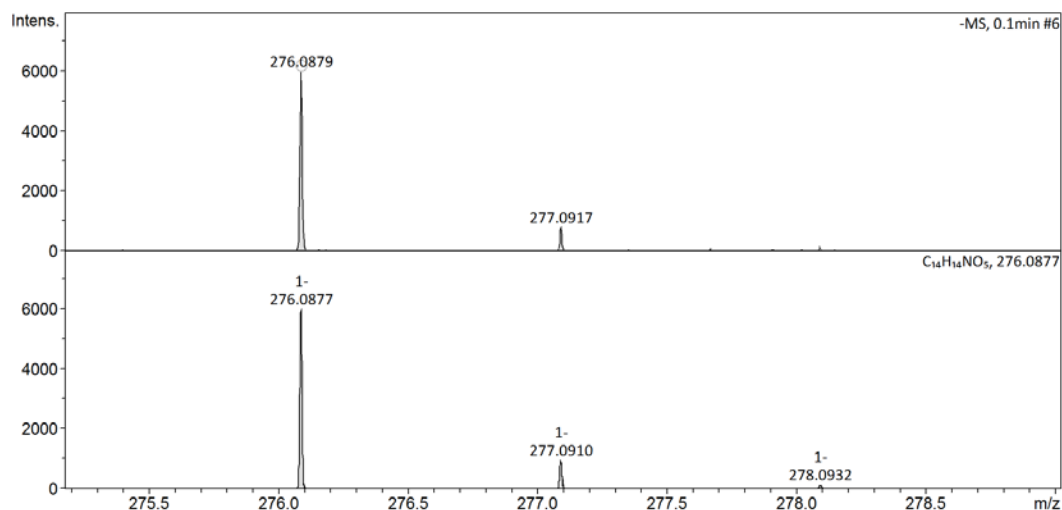

Supplement: d2qo00478j2.pdf [file d2qo00478j2.pdf]
