# Supplementary material for: Convenient and flexible syntheses of gem-dimethyl carboxylic triggers via mono-selective β-C(sp3)–H arylation of pivalic acid with ortho-substituted aryl iodides
Source: Royal Society of Chemistry journal article supplement (doi:10.1039/d2qo00478j), 2022-01-01
Supplement: d2qo00478j1.pdf [file d2qo00478j1.pdf]

## Supporting Information

### Convenient and Flexible Syntheses of *gem*-Dimethyl Carboxylic Triggers via Mono-Selective $\beta$ -C(sp<sup>3</sup>)-H Arylation of Pivalic Acid with *ortho*-Substituted Aryl Iodides

Yongliang Huang, Yu Du\*, and Weiping Su\*

## Table of Contents

|                                                                                                    |    |
|----------------------------------------------------------------------------------------------------|----|
| Table of Contents .....                                                                            | 1  |
| 1. General Information .....                                                                       | 2  |
| 2. Optimization of the Reaction Conditions .....                                                   | 3  |
| 3. General Synthetic Methods and Analytical Data for Substrates 6.....                             | 14 |
| 4. General Procedure for Mono-selective $\beta$ -C(sp <sup>3</sup> )-H Arylation of Pivalic Acid . | 18 |
| 5. Characterization of Compounds .....                                                             | 19 |
| 6. Synthetic Applications .....                                                                    | 53 |
| 6.1. Gram-Scale Experiments.....                                                                   | 53 |
| 6.2. Application Potential of Developed Methodology .....                                          | 54 |
| 7. Some Incompatible Substrates.....                                                               | 63 |
| 8. References .....                                                                                | 64 |
| 9. NMR Spectra .....                                                                               | 65 |

## 1. General Information

All reactions were performed in Schlenk tubes under an atmosphere of argon using oven-dried glassware. For reactions that require heating, oil bath was used as the heat source. Commercially available reagents were used without further purification, unless otherwise noted. Reactions were checked for completion by TLC analysis and plates were visualized with short-wave UV light (254 nm) or KMnO<sub>4</sub> aqueous. The <sup>1</sup>H, <sup>13</sup>C and <sup>19</sup>F NMR spectra were obtained in CDCl<sub>3</sub>, CD<sub>3</sub>OD or acetone-d<sub>6</sub> using a Bruker-BioSpin AVANCE III HD NMR spectrometer, respectively. Chemical shifts are reported in parts per million ( $\delta$  value) calibrated against the residual solvent peak. Signal patterns are indicated as follows: s, singlet; d, doublet; t, triplet; q, quartet; quin, quintet; hept, heptet; m, multiplet. Coupling constants (*J*) are given in hertz (Hz). The infrared spectra were recorded on a Bruker VERTEX 70 IR spectrometer as KBr pellets, with absorption reported in cm<sup>-1</sup>. High-resolution mass spectra were recorded on a Bruker Impact II UHR TOF LC/MS Mass Spectrometry.

## 2. Optimization of the Reaction Conditions

**Table S1: Optimization of substrate equivalent<sup>a</sup>**

| Entry | 5:6-1 | Yield (%) <sup>b</sup> |     |
|-------|-------|------------------------|-----|
|       |       | 7-1                    | 8-1 |
| 1     | 1:2   | 36                     | 31  |
| 2     | 1:1   | 31                     | 16  |
| 3     | 2:1   | 59                     | 14  |
| 4     | 4:1   | 72                     | 9   |
| 5     | 6:1   | 78                     | 5   |
| 6     | 8:1   | 77                     | 3   |

<sup>a</sup> Unless otherwise noted, reactions were carried out by using **5**, **6-1** (0.3 mmol), Pd(OAc)<sub>2</sub> (0.03 mmol, 10 mol %), *N*-Ac-Gly (0.06 mmol, 20 mol %), Na<sub>2</sub>HPO<sub>4</sub> (0.3 mmol, 1.0 equiv.) and AgOAc (0.6 mmol, 2 equiv.) in HFIP (1.5 mL) at 80 °C under argon atmosphere for 24 hours. <sup>b</sup> Yields were determined by <sup>1</sup>H-NMR spectroscopic analysis of crude mixtures using 1,3,5-trimethoxybenzene (16.8 mg, 0.1 mmol) as internal standard, isolated yields are given in parentheses.

**Table S2: Optimization of reaction temperature<sup>a</sup>**

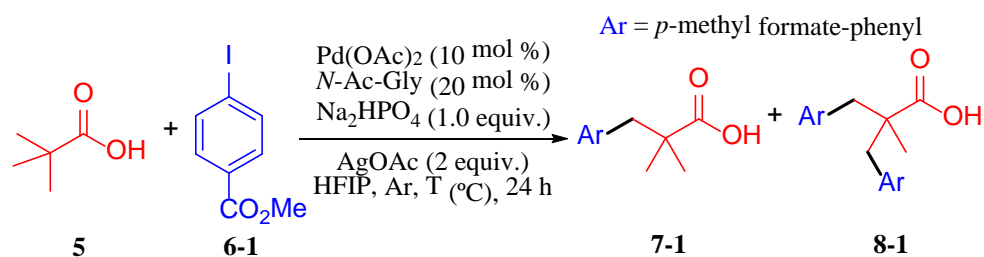

| Entry | T (°C) | Yield (%) <sup>b</sup> |       |
|-------|--------|------------------------|-------|
|       |        | 7-1                    | 8-1   |
| 1     | 30     | 5                      | 0     |
| 2     | 40     | 13                     | trace |
| 3     | 50     | 58                     | 2     |
| 4     | 60     | 80                     | 4     |
| 5     | 70     | 76                     | 5     |
| 6     | 80     | 79                     | 6     |
| 7     | 90     | 77                     | 5     |

<sup>a</sup> Unless otherwise noted, reactions were carried out by using **5** (1.8 mmol, 6 equiv.), **6-1** (0.3 mmol), Pd(OAc)<sub>2</sub> (0.03mmol, 10 mol %), *N*-Ac-Gly (0.06 mmol, 20 mol %), Na<sub>2</sub>HPO<sub>4</sub> (0.3 mmol, 1.0 equiv.) and AgOAc (0.6 mmol, 2 equiv.) in HFIP (1.5 mL) at T °C under argon atmosphere for 24 hours. <sup>b</sup> Yields were determined by <sup>1</sup>H-NMR spectroscopic analysis of crude mixtures using 1,3,5-trimethoxybenzene (16.8 mg, 0.1 mmol) as internal standard, isolated yields are given in parentheses.

**Table S3: Optimization of base amount<sup>a</sup>**

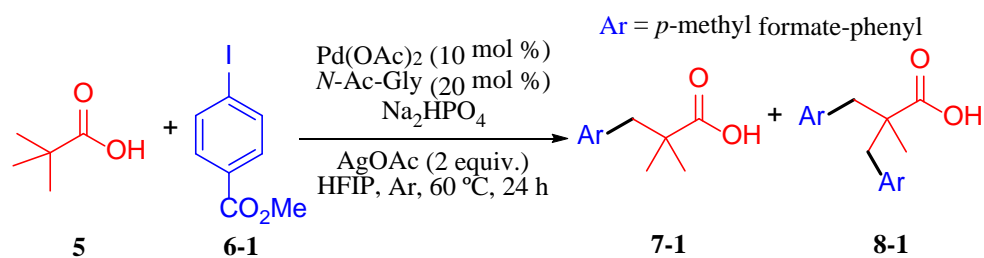

| Entry | Base (equiv.) | Yield (%) <sup>b</sup> |     |
|-------|---------------|------------------------|-----|
|       |               | 7-1                    | 8-1 |
| 1     | 0             | 52                     | 2   |
| 2     | 0.5           | 82(84)                 | 4   |

|   |   |    |   |
|---|---|----|---|
| 3 | 1 | 80 | 4 |
| 4 | 2 | 74 | 3 |

<sup>a</sup> Unless otherwise noted, reactions were carried out by using **5** (1.8 mmol, 6 equiv.), **6-1** (0.3 mmol), Pd(OAc)<sub>2</sub> (0.03mmol, 10 mol %), *N*-Ac-Gly (0.06 mmol, 20 mol %), Na<sub>2</sub>HPO<sub>4</sub> and AgOAc (0.6 mmol, 2 equiv.) in HFIP (1.5 mL) at 60 °C under argon atmosphere for 24 hours. <sup>b</sup> Yields were determined by <sup>1</sup>H-NMR spectroscopic analysis of crude mixtures using 1,3,5-trimethoxybenzene (16.8 mg, 0.1 mmol) as internal standard, isolated yields are given in parentheses.

**Table S4: Optimization of reaction time<sup>a</sup>**

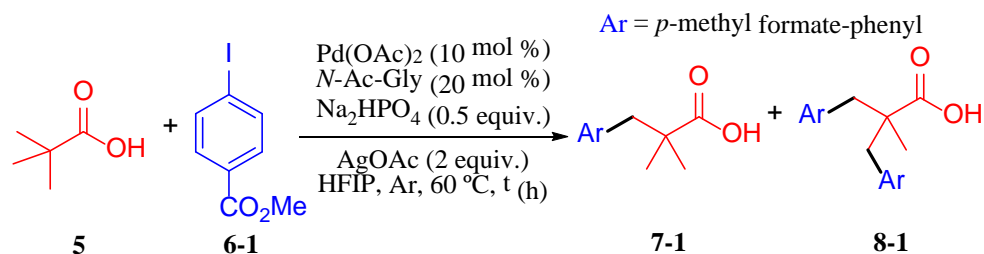

| Entry | t (h) | Yield (%) <sup>b</sup> |     |
|-------|-------|------------------------|-----|
|       |       | 7-1                    | 8-1 |
| 1     | 6     | 47                     | 1   |
| 2     | 12    | 60                     | 3   |
| 3     | 24    | 82(84)                 | 4   |
| 4     | 36    | 76                     | 6   |

<sup>a</sup> Unless otherwise noted, reactions were carried out by using **5** (1.8 mmol, 6 equiv.), **6-1** (0.3 mmol), Pd(OAc)<sub>2</sub> (0.03mmol, 10 mol %), *N*-Ac-Gly (0.06 mmol, 20 mol %), Na<sub>2</sub>HPO<sub>4</sub> (0.15 mmol, 0.5 equiv.) and AgOAc (0.6 mmol, 2 equiv.) in HFIP (1.5 mL) at 60 °C under argon atmosphere for t hours. <sup>b</sup> Yields were determined by <sup>1</sup>H-NMR spectroscopic analysis of crude mixtures using 1,3,5-trimethoxybenzene (16.8 mg, 0.1 mmol) as internal standard, isolated yields are given in parentheses.

**Table S5: Optimization of palladium-catalyst<sup>a</sup>**

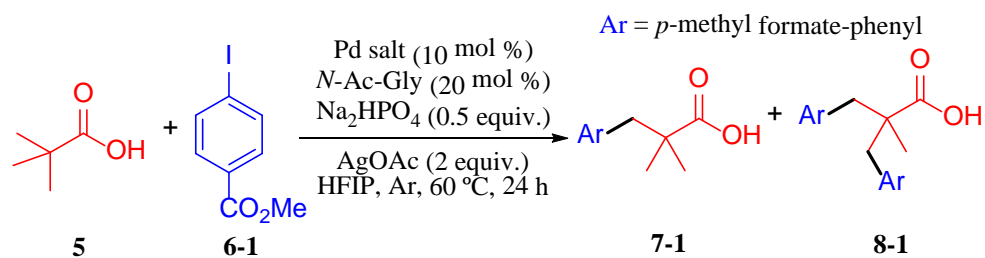

| Entry | Palladium salt                                      | Yield (%) <sup>b</sup> |     |
|-------|-----------------------------------------------------|------------------------|-----|
|       |                                                     | 7-1                    | 8-1 |
| 1     | Pd(dba) <sub>2</sub>                                | 11                     | 0   |
| 2     | PdCl <sub>2</sub>                                   | 74                     | 2   |
| 3     | Pd(PCy <sub>3</sub> ) <sub>2</sub> Cl <sub>2</sub>  | 0                      | 0   |
| 4     | Pd <sub>2</sub> (dba) <sub>3</sub>                  | 6                      | 0   |
| 5     | Pd(PPh <sub>3</sub> ) <sub>4</sub>                  | 12                     | 0   |
| 6     | Pd(TFA) <sub>2</sub>                                | 73                     | 2   |
| 7     | Pd( <i>t</i> BuCO <sub>2</sub> ) <sub>2</sub>       | 72                     | 1   |
| 8     | Pd(CH <sub>3</sub> CNBF <sub>4</sub> ) <sub>2</sub> | 75                     | 3   |
| 9     | PdBr <sub>2</sub>                                   | 74                     | 3   |
| 10    | PdI <sub>2</sub>                                    | 72                     | 4   |
| 11    | Na <sub>2</sub> PdCl <sub>4</sub>                   | 73                     | 2   |
| 12    | K <sub>2</sub> PdCl <sub>4</sub>                    | 75                     | 2   |
| 13    | Pd(MeCN) <sub>2</sub> Cl <sub>2</sub>               | 67                     | 8   |
| 14    | Pd(OAc) <sub>2</sub>                                | 82(84)                 | 4   |
| 15    | None                                                | 0                      | 0   |

<sup>a</sup> Unless otherwise noted, reactions were carried out by using **5** (1.8 mmol, 6 equiv.), **6-1** (0.3 mmol), Pd-catalyst (0.03mmol, 10 mol %), *N*-Ac-Gly (0.06 mmol, 20 mol %),

Na<sub>2</sub>HPO<sub>4</sub> (0.15 mmol, 0.5 equiv.) and AgOAc (0.6 mmol, 2 equiv.) in HFIP (1.5 mL) at 60 °C under argon atmosphere for 24 hours. <sup>b</sup> Yields were determined by <sup>1</sup>H-NMR spectroscopic analysis of crude mixtures using 1,3,5-trimethoxybenzene (16.8 mg, 0.1 mmol) as internal standard, isolated yields are given in parentheses.

**Table S6: Optimization of Ag salt<sup>a</sup>**

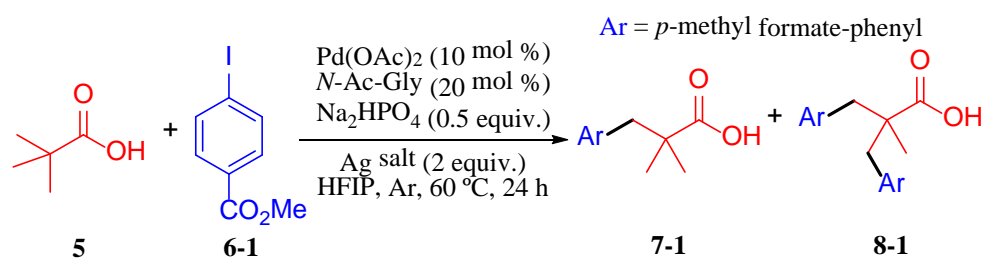

| Entry | Ag salt                            | Yield (%) <sup>b</sup> |       |
|-------|------------------------------------|------------------------|-------|
|       |                                    | 7-1                    | 8-1   |
| 1     | Ag <sub>2</sub> CO <sub>3</sub>    | 72                     | 4     |
| 2     | Ag <sub>3</sub> PO <sub>4</sub>    | 48                     | 1     |
| 3     | AgF <sub>6</sub> Sb                | 19                     | 0     |
| 4     | AgBF <sub>4</sub>                  | 27                     | 0     |
| 5     | Ag <sub>2</sub> O                  | 64                     | 5     |
| 6     | CF <sub>3</sub> SO <sub>3</sub> Ag | 15                     | 0     |
| 7     | AgF                                | 22                     | trace |
| 8     | AgOAc                              | 82(84)                 | 4     |
| 9     | Silver <i>p</i> -Toluenesulfonate  | 2                      | 0     |
| 10    | None                               | 7                      | 0     |

<sup>a</sup> Unless otherwise noted, reactions were carried out by using **5** (1.8 mmol, 6 equiv.), **6-1** (0.3 mmol), Pd(OAc)<sub>2</sub> (0.03mmol, 10 mol %), *N*-Ac-Gly (0.06 mmol, 20 mol %), Na<sub>2</sub>HPO<sub>4</sub> (0.15 mmol, 0.5 equiv.) and Ag salt (0.6 mmol, 2 equiv.) in HFIP (1.5 mL) at



60 °C under argon atmosphere for 24 hours. <sup>b</sup> Yields were determined by <sup>1</sup>H-NMR spectroscopic analysis of crude mixtures using 1,3,5-trimethoxybenzene (16.8 mg, 0.1 mmol) as internal standard, isolated yields are given in parentheses.

**Table S7: Optimization of ligand<sup>a</sup>**

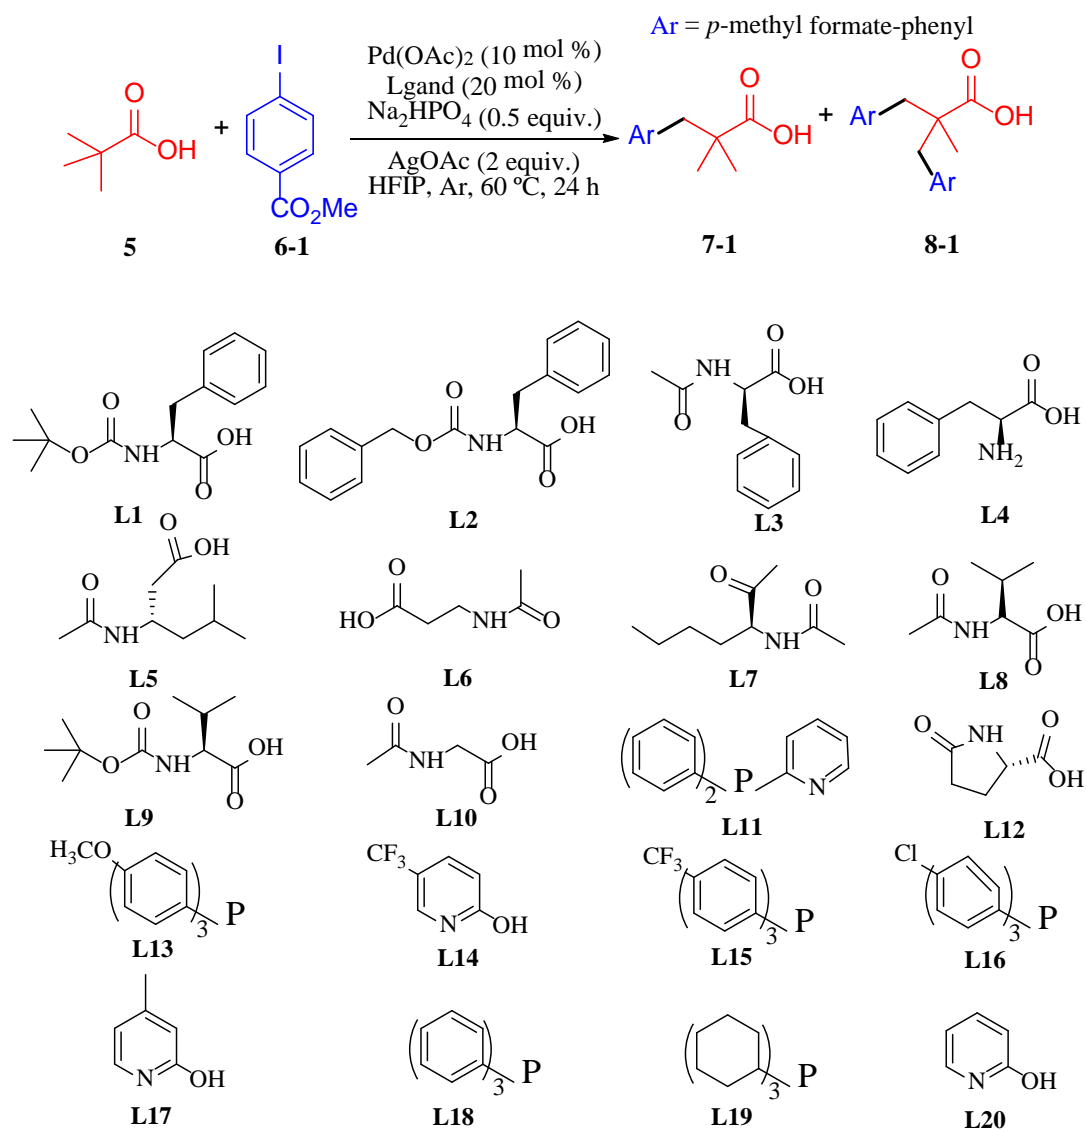

| Entry | Ligand | Yield (%) <sup>b</sup> |       |
|-------|--------|------------------------|-------|
|       |        | 7-1                    | 8-1   |
| 1     | L1     | trace                  | 0     |
| 2     | L2     | 6                      | 0     |
| 3     | L3     | 71                     | 2     |
| 4     | L4     | 0                      | 0     |
| 5     | L5     | 69                     | 3     |
| 6     | L6     | 75                     | 2     |
| 7     | L7     | 72                     | 3     |
| 8     | L8     | 71                     | 3     |
| 9     | L9     | 7                      | 0     |
| 10    | L10    | 82(84)                 | 4     |
| 11    | L11    | 0                      | 0     |
| 12    | L12    | 6                      | 0     |
| 13    | L13    | 29                     | trace |
| 14    | L14    | 58                     | trace |
| 15    | L15    | 15                     | trace |
| 16    | L16    | 14                     | trace |
| 17    | L17    | 36                     | trace |
| 18    | L18    | 5                      | 0     |
| 19    | L19    | trace                  | 0     |
| 20    | L20    | 39                     | trace |
| 21    | None   | 37                     | 0     |

<sup>a</sup>Unless otherwise noted, reactions were carried out by using **5** (1.8 mmol, 6 equiv.), **6-**

**1** (0.3 mmol), Pd(OAc)<sub>2</sub> (0.03mmol, 10 mol %), Ligand (0.06 mmol, 20 mol %), Na<sub>2</sub>HPO<sub>4</sub> (0.15 mmol, 0.5 equiv.) and AgOAc (0.6 mmol, 2 equiv.) in HFIP (1.5 mL) at 60 °C under argon atmosphere for 24 hours. <sup>b</sup> Yields were determined by <sup>1</sup>H-NMR spectroscopic analysis of crude mixtures using 1,3,5-trimethoxybenzene (16.8 mg, 0.1 mmol) as internal standard, isolated yields are given in parentheses.

**Table S8: Optimization of base<sup>a</sup>**

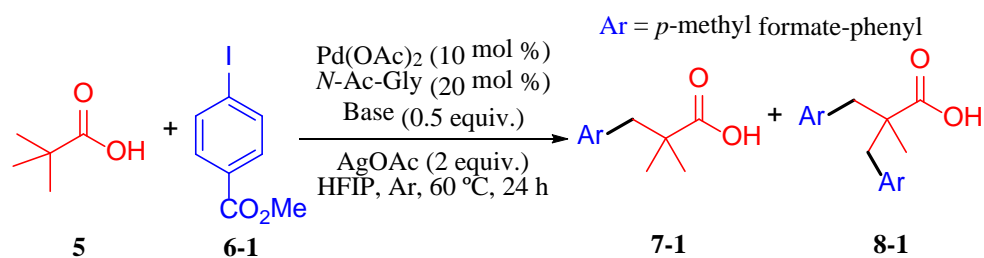

| Entry | Base                            | Yield (%) <sup>b</sup> |     |
|-------|---------------------------------|------------------------|-----|
|       |                                 | 7-1                    | 8-1 |
| 1     | CsF                             | 73                     | 4   |
| 2     | NaHCO <sub>3</sub>              | 72                     | 3   |
| 3     | MgSO <sub>4</sub>               | 72                     | 3   |
| 4     | KHSO <sub>3</sub>               | 77                     | 4   |
| 5     | K <sub>2</sub> SO <sub>4</sub>  | 69                     | 4   |
| 6     | K <sub>2</sub> CO <sub>3</sub>  | 68                     | 3   |
| 7     | Na <sub>2</sub> CO <sub>3</sub> | 70                     | 3   |
| 8     | KHSO <sub>3</sub>               | 71                     | 4   |
| 9     | CsCO <sub>3</sub>               | 69                     | 3   |
| 10    | LiCO <sub>3</sub>               | 56                     | 1   |
| 11    | NaOAc                           | 71                     | 3   |
| 12    | K <sub>2</sub> HPO <sub>4</sub> | 74                     | 3   |

|    |                                   |        |   |
|----|-----------------------------------|--------|---|
| 13 | NaHSO <sub>3</sub>                | 76     | 4 |
| 14 | CF <sub>3</sub> CO <sub>2</sub> K | 69     | 2 |
| 15 | K <sub>3</sub> PO <sub>4</sub>    | 68     | 2 |
| 16 | HCO <sub>2</sub> K                | 71     | 2 |
| 17 | Na <sub>2</sub> HPO <sub>4</sub>  | 82(84) | 4 |
| 18 | None                              | 51     | 2 |

<sup>a</sup> Unless otherwise noted, reactions were carried out by using **5** (1.8 mmol, 6 equiv.), **6-1** (0.3 mmol), Pd(OAc)<sub>2</sub> (0.03mmol, 10 mol %), *N*-Ac-Gly (0.06 mmol, 20 mol %), Base (0.15 mmol, 0.5 equiv.) and AgOAc (0.6 mmol, 2 equiv.) in HFIP (1.5 mL) at 60 °C under argon atmosphere for 24 hours. <sup>b</sup> Yields were determined by <sup>1</sup>H-NMR spectroscopic analysis of crude mixtures using 1,3,5-trimethoxybenzene (16.8 mg, 0.1 mmol) as internal standard, isolated yields are given in parentheses.

**Table S9: Optimization of solvent<sup>a</sup>**

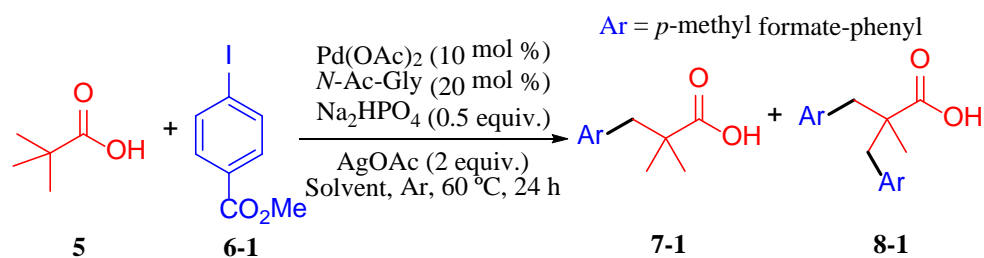

| Entry | Solvent            | Yield (%) <sup>b</sup> |       |
|-------|--------------------|------------------------|-------|
|       |                    | 7-1                    | 8-1   |
| 1     | 1,4-dioxane        | 74                     | trace |
| 2     | toluene            | 4                      | 0     |
| 3     | <i>t</i> -BuOH     | 64                     | 3     |
| 4     | CH <sub>3</sub> CN | trace                  | 0     |
| 5     | DCE                | 2                      | 0     |

|    |                    |        |   |
|----|--------------------|--------|---|
| 6  | DCM                | 6      | 0 |
| 7  | 2-Methyl-2-butanol | 53     | 1 |
| 8  | THF                | 8      | 0 |
| 9  | Hexane             | 1      | 0 |
| 10 | DMF                | 0      | 0 |
| 11 | DMSO               | trace  | 0 |
| 12 | EtOAc              | 8      | 0 |
| 13 | HFIP               | 82(84) | 4 |

<sup>a</sup> Unless otherwise noted, reactions were carried out by using **5** (1.8 mmol, 6 equiv.), **6-1** (0.3 mmol), Pd(OAc)<sub>2</sub> (0.03mmol, 10 mol %), *N*-Ac-Gly (0.06 mmol, 20 mol %), Na<sub>2</sub>HPO<sub>4</sub> (0.15 mmol, 0.5 equiv.) and AgOAc (0.6 mmol, 2 equiv.) in Solvent (1.5 mL) at 60 °C under argon atmosphere for 24 hours. <sup>b</sup> Yields were determined by <sup>1</sup>H-NMR spectroscopic analysis of crude mixtures using 1,3,5-trimethoxybenzene (16.8 mg, 0.1 mmol) as internal standard, isolated yields are given in parentheses.

**Table S10: Optimization of palladium and ligand equivalents<sup>a</sup>**

Ar = *p*-methyl formate-phenyl

| Entry | Palladium and ligand equivalents (x and y mol %) | Yield (%) <sup>b</sup> |     |
|-------|--------------------------------------------------|------------------------|-----|
|       |                                                  | 7-1                    | 8-1 |
| 1     | 2.5 and 5                                        | 33                     | 0   |
| 2     | 5 and 10                                         | 78 (81)                | 4   |
| 3     | 10 and 20                                        | 82 (84)                | 4   |

---

<sup>a</sup> Unless otherwise noted, reactions were carried out by using **5** (1.8 mmol, 6 equiv.), **6-1** (0.3 mmol), Pd(OAc)<sub>2</sub> (x mol %), *N*-Ac-Gly (y mol %), Na<sub>2</sub>HPO<sub>4</sub> (0.15 mmol, 0.5 equiv.) and AgOAc (0.6 mmol, 2 equiv.) in HFIP (1.5 mL) at 60 °C under argon atmosphere for 24 hours. <sup>b</sup> Yields were determined by <sup>1</sup>H-NMR spectroscopic analysis of crude mixtures using 1,3,5-trimethoxybenzene (16.8 mg, 0.1 mmol) as internal standard, isolated yields are given in parentheses.

### 3. General Synthetic Methods and Analytical Data for Substrates 6

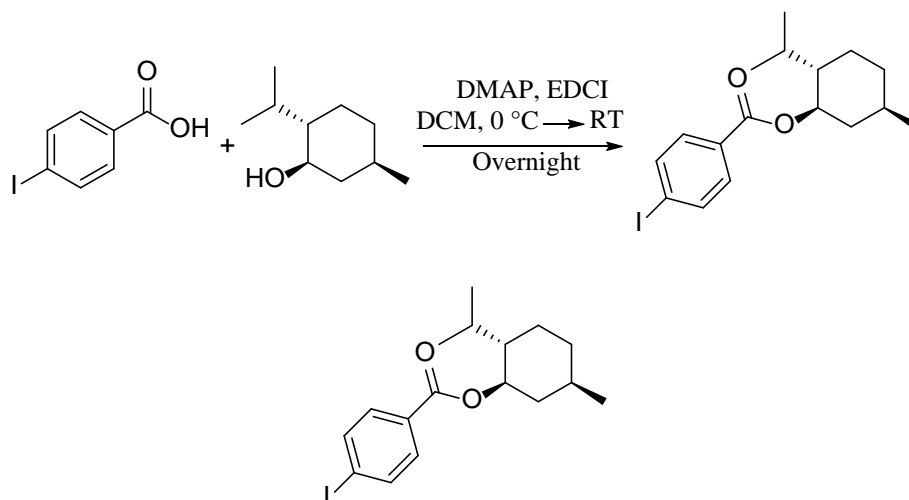

**General procedure:** The 4-Iodobenzoic acid (3.0 mmol, 744.0 mg), Menthol (3.0 mmol, 468.0 mg), DMAP (0.33 mmol, 42.0 mg) and EDCI (3.3 mmol, 633.0 mg) were dissolved in DCM (30 mL) and stirred at 0 °C for 1 h. Then the reaction was stirred at room temperature overnight. Upon completion, the reaction mixture was added 60 mL H<sub>2</sub>O, then the aqueous layer was extracted with DCM (30 mL) for 3 times. The organic layers were combined, dried over anhydrous Na<sub>2</sub>SO<sub>4</sub>, and concentrated under vacuum. The residue was purified with column chromatography on silica gel (petroleum ether: ethyl acetate = 15:1) to yield compound **6-62** as a colorless oil (996.6 mg, 86% yield). **<sup>1</sup>H NMR** (400 MHz, Chloroform-*d*) δ 7.80 - 7.73 (m, 4H), 4.93 (td, *J* = 10.9, 4.4 Hz, 1H), 2.14 - 2.09 (m, 1H), 1.97 - 1.89 (m, 1H), 1.73 - 1.68 (m, 2H), 1.53 (ddt, *J* = 14.7, 10.9, 2.9 Hz, 2H), 1.17 - 1.04 (m, 2H), 0.95 - 0.85 (m, 7H), 0.79 (d, *J* = 7.0 Hz, 3H). **<sup>13</sup>C NMR** (101 MHz, CDCl<sub>3</sub>) δ 165.4, 137.6, 131.1, 130.3, 100.5, 75.1, 47.2, 40.9, 34.3, 31.4, 26.6, 23.7, 22.1, 20.8, 16.6. **IR (KBr):**  $\nu$  (cm<sup>-1</sup>) 2952, 1711, 1584, 1455, 1391, 1266, 1174, 1099, 1007, 960, 750. The spectroscopic properties of this compound are consistent with the data reported in the literature.<sup>[1]</sup>

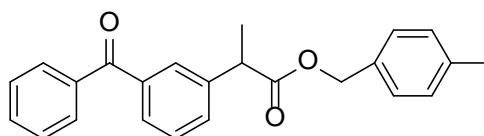

Following the general procedure and using 2-(3-benzoylphenyl)propanoic acid (3 mmol, 762.9 mg), (4-iodophenyl)methanol (3 mmol, 702.2 mg), the target compound

**6-58** was obtained as a colorless oil (1.16 g, 82%). **<sup>1</sup>H NMR** (400 MHz, Chloroform-*d*)  $\delta$  7.76 (d,  $J = 7.1$  Hz, 3H), 7.66 (d,  $J = 7.6$  Hz, 1H), 7.59 (d,  $J = 8.3$  Hz, 2H), 7.55 (d,  $J = 7.5$  Hz, 1H), 7.51 (d,  $J = 7.9$  Hz, 1H), 7.43 (dt,  $J = 13.2, 7.6$  Hz, 3H), 6.95 (d,  $J = 8.1$  Hz, 2H), 5.03 (s, 2H), 3.84 (q,  $J = 7.1$  Hz, 1H), 1.54 (d,  $J = 7.2$  Hz, 3H). **<sup>13</sup>C NMR** (101 MHz, CDCl<sub>3</sub>)  $\delta$  196.3, 173.7, 140.6, 138.0, 137.6, 137.5, 135.5, 132.6, 131.6, 130.1, 129.8, 129.2, 129.1, 128.6, 128.4, 94.0, 65.9, 45.4, 18.4. **IR (KBr):**  $\nu$  (cm<sup>-1</sup>) 2977, 1716, 1654, 1522, 1446, 1316, 1242, 1142, 1007, 970, 695. **HRMS** (ESI)  $m/z$ : Calculated for C<sub>23</sub>H<sub>19</sub>INaO<sub>3</sub><sup>+</sup> [M+Na]<sup>+</sup> 493.0271, found 493.0271.

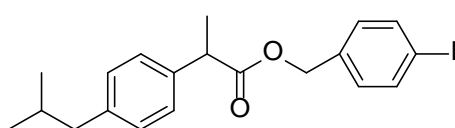

Following the general procedure and using 2-(4-isobutylphenyl)propanoic acid (3 mmol, 618.9 mg), (4-iodophenyl)methanol (3 mmol, 702.2 mg), the target compound **6-59** was obtained as a colorless oil (1.0 g, 80%). **<sup>1</sup>H NMR** (400 MHz, Chloroform-*d*)  $\delta$  7.57 - 7.51 (m, 2H), 7.16 (d,  $J = 8.0$  Hz, 2H), 7.06 (d,  $J = 8.0$  Hz, 2H), 6.87 (d,  $J = 8.1$  Hz, 2H), 4.98 (dd,  $J = 28.4$  Hz,  $J = 2.8$  Hz, 2H), 3.71 (q,  $J = 7.1$  Hz, 1H), 2.43 (d,  $J = 7.2$  Hz, 2H), 1.88 - 1.78 (m, 1H), 1.47 (d,  $J = 7.2$  Hz, 3H), 0.88 (d,  $J = 6.7$  Hz, 6H). **<sup>13</sup>C NMR** (101 MHz, CDCl<sub>3</sub>)  $\delta$  174.3, 140.7, 137.6, 137.6, 135.9, 129.7, 129.5, 127.4, 93.8, 65.6, 45.2, 45.2, 30.3, 22.6, 18.5. **IR (KBr):**  $\nu$  (cm<sup>-1</sup>) 2952, 1734, 1512, 1484, 1341, 1205, 1143, 1007, 970, 792. The spectroscopic properties of this compound are consistent with the data reported in the literature.<sup>[2]</sup>

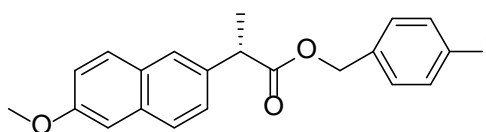

Following the general procedure and using (*S*)-2-(6-methoxynaphthalen-2-yl)propanoic acid (3 mmol, 690.8 mg), (4-iodophenyl)methanol (3 mmol, 702.2 mg), the target compound **6-60** was obtained as a colorless solid (1.07 g, 80%). **Mp:** 94-96 °C. **<sup>1</sup>H NMR** (400 MHz, Chloroform-*d*)  $\delta$  7.66 - 7.57 (m, 3H), 7.51 (d,  $J = 8.0$  Hz, 2H), 7.34 (dd,  $J = 8.5, 1.8$  Hz, 1H), 7.11 (dd,  $J = 8.9, 2.5$  Hz, 1H), 7.06 (d,  $J = 2.5$  Hz, 1H), 6.86 (d,  $J = 8.1$  Hz, 2H), 4.97 (s, 2H), 3.85 (q,  $J = 7.2$  Hz, 1H), 3.82 (s, 3H), 1.55



(d,  $J = 7.2$  Hz, 3H).  $^{13}\text{C}$  NMR (101 MHz,  $\text{CDCl}_3$ )  $\delta$  174.3, 157.8, 137.6, 135.8, 135.5, 133.8, 129.9, 129.4, 129.0, 127.3, 126.3, 126.1, 119.2, 105.7, 93.9, 65.8, 55.4, 45.5, 18.6. **IR (KBr):**  $\nu$  ( $\text{cm}^{-1}$ ) 2963, 1733, 1603, 1483, 1374, 1322, 1265, 1227, 1265, 1227, 1174, 1087, 1028, 1008, 964, 813. **HRMS** (ESI)  $m/z$ : Calculated for  $\text{C}_{21}\text{H}_{19}\text{INaO}_3^+$   $[\text{M}+\text{Na}]^+$  469.0271, found 469.0271.

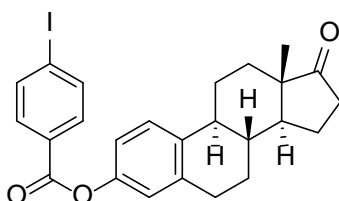

Following the general procedure and using 4-Iodobenzoic acid (3.0 mmol, 744.0 mg), Estrone (3 mmol, 811.2 mg), the target compound **6-61** was obtained as a colorless solid (1.4 g, 93%). **Mp:** 246-248 °C.  $^1\text{H}$  NMR (400 MHz, Chloroform- $d$ )  $\delta$  7.92 - 7.82 (m, 4H), 7.33 (d,  $J = 8.5$  Hz, 1H), 6.97 (dd,  $J = 8.4, 2.5$  Hz, 1H), 6.93 (d,  $J = 2.6$  Hz, 1H), 2.93 (dd,  $J = 8.0, 3.4$  Hz, 2H), 2.51 (dd,  $J = 18.9, 8.6$  Hz, 1H), 2.46 - 2.38 (m, 1H), 2.30 (td,  $J = 10.8, 4.0$  Hz, 1H), 2.20 - 1.96 (m, 4H), 1.76 - 1.39 (m, 7H), 0.92 (s, 3H).  $^{13}\text{C}$  NMR (101 MHz,  $\text{CDCl}_3$ )  $\delta$  220.8, 165.0, 148.7, 138.2, 138.0, 137.7, 131.5, 129.1, 126.6, 121.6, 118.8, 101.6, 50.4, 48.0, 44.2, 38.0, 35.9, 31.6, 29.5, 26.4, 25.8, 21.6, 13.9. **IR (KBr):**  $\nu$  ( $\text{cm}^{-1}$ ) 2930, 1722, 1584, 1492, 1451, 1391, 1259, 1209, 1175, 1148, 1067, 1005, 896, 749. **HRMS** (ESI)  $m/z$ : Calculated for  $\text{C}_{25}\text{H}_{25}\text{INaO}_3^+$   $[\text{M}+\text{Na}]^+$  523.0741, found 523.0741.

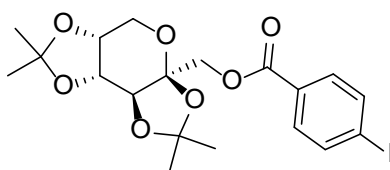

Following the general procedure and using 4-Iodobenzoic acid (3.0 mmol, 744.0 mg), Diacetonefructose (3 mmol, 780.9 mg), the target compound **6-63** was obtained as a colorless oil (1.15 g, 78%).  $^1\text{H}$  NMR (400 MHz, Chloroform- $d$ )  $\delta$  7.79 (s, 4H), 4.69 (d,  $J = 11.8$  Hz, 1H), 4.64 (dd,  $J = 8.0, 2.6$  Hz, 1H), 4.45 (d,  $J = 2.6$  Hz, 1H), 4.32 (d,  $J = 11.8$  Hz, 1H), 4.26 (d,  $J = 7.9$  Hz, 1H), 3.94 (d,  $J = 12.9$  Hz, 1H), 3.79 (d,  $J = 13.0$  Hz, 1H), 1.54 (s, 3H), 1.46 (s, 3H), 1.36 (s, 3H), 1.34 (s, 3H).  $^{13}\text{C}$  NMR (101 MHz,

CDCl<sub>3</sub>)  $\delta$  165.3, 137.7, 131.1, 129.4, 109.0, 108.7, 101.5, 101.0, 70.7, 70.5, 70.0, 65.5, 61.3, 26.5, 25.9, 25.5, 24.1. **IR (KBr):**  $\nu$  (cm<sup>-1</sup>) 2988, 2936, 1720, 1585, 1453, 1373, 1250, 1205, 1163, 1101, 1068, 1006, 887, 750. **HRMS** (ESI)  $m/z$ : Calculated for C<sub>19</sub>H<sub>23</sub>INaO<sub>7</sub><sup>+</sup> [M+Na]<sup>+</sup> 513.0381, found 513.0381.

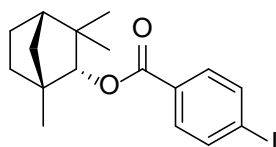

Following the general procedure and using 4-Iodobenzoic acid (3.0 mmol, 744.0 mg), (+)-Fenchol (3 mmol, 462.8 mg), the target compound **6-64** was obtained as a colorless solid (933.8 mg, 81%). **Mp:** 77-79 °C. **<sup>1</sup>H NMR** (400 MHz, Chloroform-*d*)  $\delta$  7.79 (q,  $J$  = 8.4 Hz, 4H), 4.61 (s, 1H), 1.93 - 1.86 (m, 1H), 1.81 - 1.73 (m, 2H), 1.66 (d,  $J$  = 10.2 Hz, 1H), 1.56 - 1.46 (m, 1H), 1.30 - 1.20 (m, 2H), 1.18 (s, 3H), 1.10 (s, 3H), 0.82 (s, 3H). **<sup>13</sup>C NMR** (101 MHz, CDCl<sub>3</sub>)  $\delta$  166.4, 137.8, 131.0, 130.2, 100.6, 87.0, 48.6, 48.4, 41.5, 39.9, 29.8, 26.9, 25.9, 20.3, 19.5. **IR (KBr):**  $\nu$  (cm<sup>-1</sup>) 2950, 1711, 1582, 1459, 1389, 1264, 1172, 1113, 1100, 1031, 1002, 845, 749. **HRMS** (ESI)  $m/z$ : Calculated for C<sub>17</sub>H<sub>22</sub>IO<sub>2</sub><sup>+</sup> [M+H]<sup>+</sup> 385.0659, found 385.0658.

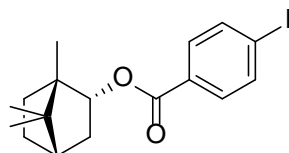

Following the general procedure and using 4-Iodobenzoic acid (3.0 mmol, 744 mg), L(-)-Borneol (3 mmol, 462.8 mg), the target compound **6-65** was obtained as a colorless solid (968.4 mg, 84%). **Mp:** 100-102 °C. **<sup>1</sup>H NMR** (400 MHz, Chloroform-*d*)  $\delta$  7.83 - 7.74 (m, 4H), 5.10 (ddd,  $J$  = 10.0, 3.5, 2.1 Hz, 1H), 2.52 - 2.42 (m, 1H), 2.08 (ddd,  $J$  = 13.3, 9.4, 4.4 Hz, 1H), 1.85 - 1.76 (m, 1H), 1.74 (t,  $J$  = 4.5 Hz, 1H), 1.45 - 1.37 (m, 1H), 1.34 - 1.27 (m, 1H), 1.10 (dd,  $J$  = 13.8, 3.5 Hz, 1H), 0.96 (s, 3H), 0.91 (d,  $J$  = 4.0 Hz, 6H). **<sup>13</sup>C NMR** (101 MHz, CDCl<sub>3</sub>)  $\delta$  166.3, 137.7, 131.0, 130.4, 100.5, 80.9, 49.1, 47.9, 45.0, 36.9, 28.1, 27.4, 19.8, 18.9, 13.7. **IR (KBr):**  $\nu$  (cm<sup>-1</sup>) 2951, 1711, 1583, 1450, 1389, 1265, 1173, 1113, 1100, 1002, 845, 741. **HRMS** (ESI)  $m/z$ : Calculated for C<sub>17</sub>H<sub>21</sub>INaO<sub>2</sub><sup>+</sup> [M+Na]<sup>+</sup> 407.0470, found 407.0478.

#### 4. General Procedure for Mono-selective $\beta$ -C(sp<sup>3</sup>)-H Arylation of Pivalic Acid

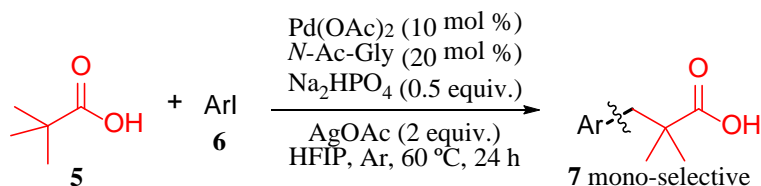

**General Procedure:** In a glovebox filled with argon, a clean, oven-dried screw cap reaction tube with previously placed magnetic stir-bar was charged with pivalic acid (184.0 mg, 1.8 mmol, 6 equiv.), aryl iodide (0.3 mmol), Pd(OAc)<sub>2</sub> (6.8 mg, 0.03 mmol, 10 mol%), *N*-Ac-Gly-OH (7.1 mg, 0.06 mmol, 20 mol%), AgOAc (101.0 mg, 0.6 mmol, 2 equiv.) and Na<sub>2</sub>HPO<sub>4</sub> (21.3 mg, 0.15 mmol, 0.5 equiv.), followed by addition of HFIP (1.5 mL). The vessel was sealed and moved out of the glovebox, and the reaction was stirred at room temperature for 10 minutes. Then the reaction vessel was placed in a pre-heated (60 °C) oil bath and stirring was continued at this temperature for 24 h. The reaction mixture was allowed to cool to room temperature. The resulting mixture was filtered through a celite bed using ethyl acetate as the eluent. After concentration under reduced pressure, the residue was purified by column chromatography on silica gel (petroleum-ether / ethyl acetate / formic acid = 24:1:0.005 to 8:1:0.005) to give the desired arylated product.

## 5. Characterization of Compounds

### 3-(4-(methoxycarbonyl)phenyl)-2,2-dimethylpropanoic acid (7-1)

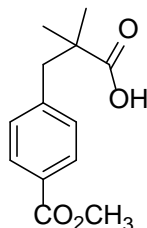

Following the general procedure and using methyl 4-iodobenzoate (78.6 mg, 0.3 mmol) as the arylating agent, the target compound was obtained as a colorless solid (59.5 mg, 84%). **Mp:** 95-97 °C. **<sup>1</sup>H NMR** (400 MHz, Chloroform-*d*) δ 7.96 (d, *J* = 8.0 Hz, 2H), 7.25 (d, *J* = 8.0 Hz, 2H), 3.91 (s, 3H), 2.95 (s, 2H), 1.22 (s, 6H). **<sup>13</sup>C NMR** (101 MHz, CDCl<sub>3</sub>) δ 183.8, 167.1, 143.0, 130.3, 129.4, 128.5, 52.1, 45.7, 43.5, 24.8. **IR (KBr):**  $\nu$  (cm<sup>-1</sup>) 2968, 2932, 1724, 1682, 1441, 1298, 1130, 868, 712, 536. **HRMS** (ESI) *m/z*: Calculated for C<sub>13</sub>H<sub>15</sub>O<sub>4</sub><sup>-</sup> [M-H]<sup>-</sup> 235.0976, found 235.0976.

### 3-(3-(methoxycarbonyl)phenyl)-2,2-dimethylpropanoic acid (7-2)

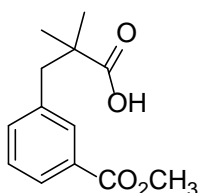

Following the general procedure and using methyl 3-iodobenzoate (78.6 mg, 0.3 mmol) as the arylating agent, the target compound was obtained as a colorless solid (53.9 mg, 76%). **Mp:** 91-93 °C. **<sup>1</sup>H NMR** (400 MHz, Chloroform-*d*) δ 7.92 (d, *J* = 7.1 Hz, 1H), 7.86 (s, 1H), 7.40 - 7.32 (m, 2H), 3.90 (s, 3H), 2.95 (s, 2H), 1.21 (s, 6H). **<sup>13</sup>C NMR** (101 MHz, CDCl<sub>3</sub>) δ 183.6, 167.2, 137.9, 134.8, 131.4, 129.9, 128.2, 127.9, 52.2, 45.5, 43.4, 24.6. **IR (KBr):**  $\nu$  (cm<sup>-1</sup>) 2970, 2933, 1722, 1695, 1470, 1288, 1106, 954, 750, 558. **HRMS** (ESI) *m/z*: Calculated for C<sub>13</sub>H<sub>15</sub>O<sub>4</sub><sup>-</sup> [M-H]<sup>-</sup> 235.0976, found 235.0976.

### 3-(4-(ethoxycarbonyl)phenyl)-2,2-dimethylpropanoic acid (7-3)

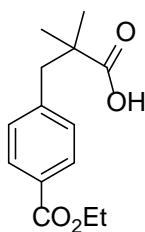

Following the general procedure and using ethyl 4-iodobenzoate (50.5  $\mu$ L, 0.3 mmol) as the arylating agent, the target compound was obtained as a colorless oil (60.8 mg, 81%).  **$^1\text{H NMR}$**  (400 MHz, Chloroform-*d*)  $\delta$  7.96 (d,  $J = 7.8$  Hz, 2H), 7.24 (d,  $J = 7.9$  Hz, 2H), 4.37 (q,  $J = 7.1$  Hz, 2H), 2.95 (s, 2H), 1.38 (t,  $J = 7.1$  Hz, 3H), 1.21 (s, 6H).  **$^{13}\text{C NMR}$**  (101 MHz,  $\text{CDCl}_3$ )  $\delta$  183.5, 166.7, 142.9, 130.3, 129.3, 128.9, 60.9, 45.7, 43.4, 24.8, 14.4. The spectroscopic properties of this compound are consistent with the data reported in the literature.<sup>[3]</sup>

### 3-(3-(ethoxycarbonyl)phenyl)-2,2-dimethylpropanoic acid (7-4)

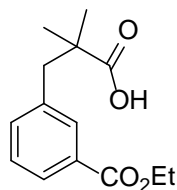

Following the general procedure and using ethyl 3-iodobenzoate (82.8 mg, 0.3 mmol) as the arylating agent, the target compound was obtained as a colorless oil (54.1 mg, 72%).  **$^1\text{H NMR}$**  (400 MHz, Chloroform-*d*)  $\delta$  7.92 (d,  $J = 7.0$  Hz, 1H), 7.86 (s, 1H), 7.39 - 7.32 (m, 2H), 4.36 (q,  $J = 7.1$  Hz, 2H), 2.95 (s, 2H), 1.39 (t,  $J = 7.1$  Hz, 3H), 1.21 (s, 6H).  **$^{13}\text{C NMR}$**  (101 MHz,  $\text{CDCl}_3$ )  $\delta$  183.8, 166.7, 137.9, 134.7, 131.4, 130.3, 128.1, 127.9, 61.0, 45.4, 43.4, 24.6, 14.3. The spectroscopic properties of this compound are consistent with the data reported in the literature.<sup>[4]</sup>

### 3-(4-(tert-butoxycarbonyl)phenyl)-2,2-dimethylpropanoic acid (7-5)

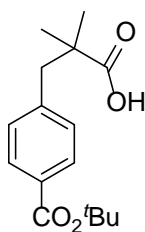

Following the general procedure and using tert-butyl 4-iodobenzoate (62.2  $\mu\text{L}$ , 0.3 mmol) as the arylating agent, the target compound was obtained as a colorless solid (25.1 mg, 30%). **Mp:** 89-91  $^{\circ}\text{C}$ .  **$^1\text{H NMR}$**  (400 MHz, Chloroform-*d*)  $\delta$  7.90 (d,  $J = 8.0$  Hz, 2H), 7.22 (d,  $J = 8.0$  Hz, 2H), 2.94 (s, 2H), 1.58 (s, 9H), 1.21 (s, 6H).  **$^{13}\text{C NMR}$**  (101 MHz,  $\text{CDCl}_3$ )  $\delta$  183.8, 165.8, 142.4, 130.4, 130.1, 129.2, 80.9, 45.7, 43.4, 28.2, 24.7. **IR (KBr):**  $\nu$  ( $\text{cm}^{-1}$ ) 2983, 2925, 1740, 1675, 1472, 1324, 1123, 1019, 842, 752, 577. **HRMS (ESI)  $m/z$ :** Calculated for  $\text{C}_{16}\text{H}_{21}\text{O}_4^-$   $[\text{M}-\text{H}]^-$  277.1445, found 277.1445.

### 3-(4-acetylphenyl)-2,2-dimethylpropanoic acid (7-6)

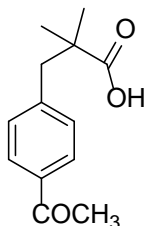

Following the general procedure and using 1-(4-iodophenyl)ethan-1-one (73.8 mg, 0.3 mmol) as the arylating agent, the target compound was obtained as a colorless solid (55.5 mg, 84%) **Mp:** 114-116  $^{\circ}\text{C}$ .  **$^1\text{H NMR}$**  (400 MHz, Chloroform-*d*)  $\delta$  7.88 (d,  $J = 8.3$  Hz, 2H), 7.27 (d,  $J = 8.3$  Hz, 2H), 2.96 (s, 2H), 2.60 (s, 3H), 1.23 (s, 6H).  **$^{13}\text{C NMR}$**  (101 MHz,  $\text{CDCl}_3$ )  $\delta$  198.1, 183.6, 143.4, 135.6, 130.5, 128.2, 45.7, 43.5, 26.6, 24.8. **IR (KBr):**  $\nu$  ( $\text{cm}^{-1}$ ) 2964, 2932, 1722, 1680, 1567, 1364, 1278, 1133, 916, 842, 632. **HRMS (ESI)  $m/z$ :** Calculated for  $\text{C}_{13}\text{H}_{15}\text{O}_3^-$   $[\text{M}-\text{H}]^-$  219.1027, found 219.1027.

### 3-(3-acetylphenyl)-2,2-dimethylpropanoic acid (7-7)

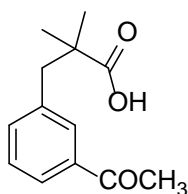

Following the general procedure and using 1-(3-iodophenyl)ethan-1-one (41.8  $\mu\text{L}$ , 0.3 mmol) as the arylating agent, the target compound was obtained as a colorless oil (56.1 mg, 76%)  $^1\text{H NMR}$  (400 MHz, Chloroform-*d*)  $\delta$  7.83 (d,  $J = 6.1$  Hz, 1H), 7.78 (s, 1H), 7.41 - 7.34 (m, 2H), 2.96 (s, 2H), 2.58 (s, 3H), 1.22 (s, 6H).  $^{13}\text{C NMR}$  (101 MHz,  $\text{CDCl}_3$ )  $\delta$  198.5, 183.8, 138.1, 136.9, 135.0, 130.0, 128.4, 126.8, 45.6, 43.4, 26.6, 24.7. The spectroscopic properties of this compound are consistent with the data reported in the literature.<sup>[3]</sup>

### 3-(4-formylphenyl)-2,2-dimethylpropanoic acid (7-8)

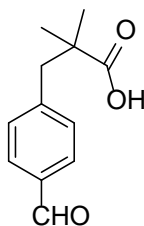

Following the general procedure and using 4-iodobenzaldehyde (69.7 mg, 0.3 mmol) as the arylating agent, the target compound was obtained as a colorless solid (55.1 mg, 86%) **Mp**: 82-84  $^{\circ}\text{C}$ .  $^1\text{H NMR}$  (400 MHz, Chloroform-*d*)  $\delta$  9.99 (s, 1H), 7.81 (d,  $J = 8.2$  Hz, 2H), 7.35 (d,  $J = 8.1$  Hz, 2H), 2.98 (s, 2H), 1.24 (s, 6H).  $^{13}\text{C NMR}$  (101 MHz,  $\text{CDCl}_3$ )  $\delta$  192.2, 183.6, 145.1, 135.0, 130.9, 129.6, 45.9, 43.5, 24.8. **IR (KBr)**:  $\nu$  ( $\text{cm}^{-1}$ ) 2973, 2933, 1699, 1574, 1470, 1296, 1170, 1131, 951, 835, 711. **HRMS** (ESI)  $m/z$ : Calculated for  $\text{C}_{12}\text{H}_{13}\text{O}_3^-$   $[\text{M}-\text{H}]^-$  205.0870, found 205.0870.

### 3-(3-formylphenyl)-2,2-dimethylpropanoic acid (7-9)

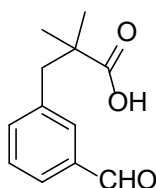

Following the general procedure and using 3-iodobenzaldehyde (69.7 mg, 0.3 mmol) as the arylating agent, the target compound was obtained as a colorless oil (49.5 mg, 80%). **<sup>1</sup>H NMR** (400 MHz, Chloroform-*d*)  $\delta$  9.99 (s, 1H), 7.79 - 7.74 (m, 1H), 7.69 (s, 1H), 7.48 - 7.42 (m, 2H), 2.98 (s, 2H), 1.23 (s, 6H). **<sup>13</sup>C NMR** (101 MHz, CDCl<sub>3</sub>)  $\delta$  192.6, 183.6, 138.7, 136.4, 136.3, 131.3, 128.8, 128.4, 45.4, 43.4, 24.7. **IR (KBr):**  $\nu$  (cm<sup>-1</sup>) 2976, 2927, 1699, 1585, 1474, 1390, 1247, 1146, 807, 696. **HRMS (ESI) *m/z*:** Calculated for C<sub>12</sub>H<sub>13</sub>O<sub>3</sub><sup>-</sup> [M-H]<sup>-</sup> 205.0870, found 205.0870.

### 2,2-dimethyl-3-(4-nitrophenyl)propanoic acid (7-10)

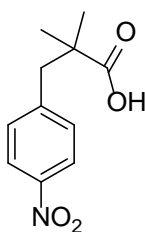

Following the general procedure and using 1-iodo-4-nitrobenzene (74.7 mg, 0.3 mmol) as the arylating agent, the target compound was obtained as a colorless solid (54.9 mg, 82%). **Mp:** 122-124 °C. **<sup>1</sup>H NMR** (400 MHz, Chloroform-*d*)  $\delta$  8.15 (d, *J* = 8.6 Hz, 2H), 7.35 (d, *J* = 8.6 Hz, 2H), 3.01 (s, 2H), 1.25 (s, 6H). **<sup>13</sup>C NMR** (101 MHz, CDCl<sub>3</sub>)  $\delta$  183.7, 146.9, 145.4, 131.1, 123.3, 45.4, 43.5, 24.8. The spectroscopic properties of this compound are consistent with the data reported in the literature.<sup>[5]</sup>



### 2,2-dimethyl-3-(3-nitrophenyl)propanoic acid (7-11)

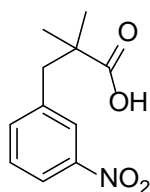

Following the general procedure and using 1-iodo-3-nitrobenzene (38.4  $\mu\text{L}$ , 0.3 mmol) as the arylating agent, the target compound was obtained as a colorless solid (53.6 mg, 80%).  **$^1\text{H NMR}$**  (400 MHz, Chloroform-*d*)  $\delta$  8.11 (d,  $J = 9.0$  Hz, 1H), 8.05 (s, 1H), 7.52 (d,  $J = 7.7$  Hz, 1H), 7.46 (t,  $J = 7.8$  Hz, 1H), 3.01 (s, 2H), 1.25 (s, 6H).  **$^{13}\text{C NMR}$**  (101 MHz,  $\text{CDCl}_3$ )  $\delta$  183.0, 148.1, 139.6, 136.4, 129.0, 124.9, 121.9, 45.3, 43.5, 24.8. The spectroscopic properties of this compound are consistent with the data reported in the literature.<sup>[6]</sup>

### 2,2-dimethyl-3-(4-(trifluoromethyl)phenyl)propanoic acid (7-12)

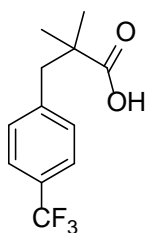

Following the general procedure and using 1-iodo-4-(trifluoromethyl)benzene (44.1  $\mu\text{L}$ , 0.3 mmol) as the arylating agent, the target compound was obtained as a colorless solid (61.3 mg, 83%). **Mp:** 66-68  $^{\circ}\text{C}$ .  **$^1\text{H NMR}$**  (400 MHz, Chloroform-*d*)  $\delta$  7.53 (d,  $J = 8.0$  Hz, 2H), 7.29 (d,  $J = 7.9$  Hz, 2H), 2.95 (s, 2H), 1.23 (s, 6H).  **$^{13}\text{C NMR}$**  (101 MHz,  $\text{CDCl}_3$ )  $\delta$  183.9, 141.7, 130.6, 129.0 (q,  $J = 32.4$  Hz), 125.0 (q,  $J = 3.8$  Hz), 124.3 (q,  $J = 271.8$  Hz), 45.5, 43.4, 24.8.  **$^{19}\text{F NMR}$**  (376 MHz,  $\text{CDCl}_3$ )  $\delta$  -62.43. The spectroscopic properties of this compound are consistent with the data reported in the literature.<sup>[4]</sup>

### 2,2-dimethyl-3-(3-(trifluoromethyl)phenyl)propanoic acid (7-13)

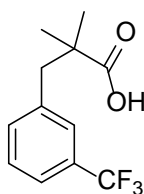

Following the general procedure and using 1-iodo-3-(trifluoromethyl)benzene (43.3  $\mu\text{L}$ , 0.3 mmol) as the arylating agent, the target compound was obtained as a colorless solid (59.8 mg, 81%). **Mp:** 50-52  $^{\circ}\text{C}$ .  **$^1\text{H NMR}$**  (400 MHz, Chloroform-*d*)  $\delta$  7.50 (d,  $J = 7.5$  Hz, 1H), 7.43 (s, 1H), 7.41 - 7.33 (m, 2H), 2.94 (s, 2H), 1.22 (s, 6H).  **$^{13}\text{C NMR}$**  (101 MHz,  $\text{CDCl}_3$ )  $\delta$  184.1, 138.5, 133.6, 130.4 (q,  $J = 32.1$  Hz), 128.5, 126.9 (q,  $J = 3.8$  Hz), 124.2 (q,  $J = 272.1$  Hz), 123.5 (q,  $J = 3.9$  Hz), 45.6, 43.5, 24.6.  **$^{19}\text{F NMR}$**  (376 MHz,  $\text{CDCl}_3$ )  $\delta$  -62.63. **IR (KBr):**  $\nu$  ( $\text{cm}^{-1}$ ) 2977, 2930, 1699, 1467, 1339, 1204, 1154, 1118, 1079, 814. **HRMS (ESI)  $m/z$ :** Calculated for  $\text{C}_{12}\text{H}_{12}\text{F}_3\text{O}_2^-$  [M-H] $^-$  245.0795, found 245.0795.

### 3-(4-fluorophenyl)-2,2-dimethylpropanoic acid (7-14)

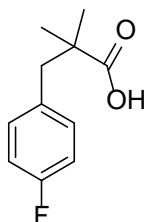

Following the general procedure and using 1-fluoro-4-iodobenzene (34.6  $\mu\text{L}$ , 0.3 mmol) as the arylating agent, the target compound was obtained as a colorless oil (45.3 mg, 77%).  **$^1\text{H NMR}$**  (400 MHz, Chloroform-*d*)  $\delta$  7.14 - 7.10 (m, 2H), 6.98 - 6.93 (m, 2H), 2.86 (s, 2H), 1.20 (s, 6H).  **$^{13}\text{C NMR}$**  (101 MHz,  $\text{CDCl}_3$ )  $\delta$  184.2, 161.8 (d,  $J = 244.6$  Hz), 133.2 (d,  $J = 3.3$  Hz), 131.6 (d,  $J = 7.9$  Hz), 114.9 (d,  $J = 21.0$  Hz), 45.0, 43.5, 24.6.  **$^{19}\text{F NMR}$**  (376 MHz,  $\text{CDCl}_3$ )  $\delta$  -116.53. The spectroscopic properties of this compound are consistent with the data reported in the literature. <sup>[6]</sup>

### 3-(4-chlorophenyl)-2,2-dimethylpropanoic acid (7-15)

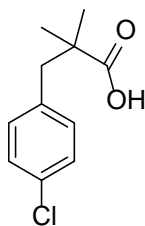

Following the general procedure and using 1-chloro-4-iodobenzene (71.6 mg, 0.3 mmol) as the arylating agent, the target compound was obtained as a colorless solid (47.9 mg, 75%). **Mp:** 77-79 °C. **<sup>1</sup>H NMR** (400 MHz, Chloroform-*d*) δ 7.24 (d, *J* = 8.5 Hz, 2H), 7.09 (d, *J* = 8.4 Hz, 2H), 2.85 (s, 2H), 1.20 (s, 6H). **<sup>13</sup>C NMR** (101 MHz, CDCl<sub>3</sub>) δ 184.0, 136.0, 132.6, 131.6, 128.2, 45.2, 43.4, 24.7. **IR (KBr):**  $\nu$  (cm<sup>-1</sup>) 2970, 2932, 1695, 1494, 1294, 1158, 1015, 846, 508. **HRMS** (ESI) *m/z*: Calculated for C<sub>11</sub>H<sub>12</sub>ClO<sub>2</sub><sup>-</sup> [M-H]<sup>-</sup> 211.0531, found 211.0531.

### 3-(3-chlorophenyl)-2,2-dimethylpropanoic acid (7-16)

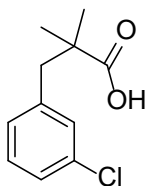

Following the general procedure and using 1-chloro-3-iodobenzene (37.2 μL, 0.3 mmol) as the arylating agent, the target compound was obtained as a colorless oil (46.6 mg, 73%). **<sup>1</sup>H NMR** (400 MHz, Chloroform-*d*) δ 7.20 (dd, *J* = 4.9, 2.2 Hz, 2H), 7.16 (s, 1H), 7.07 - 7.03 (m, 1H), 2.86 (s, 2H), 1.21 (s, 6H). **<sup>13</sup>C NMR** (101 MHz, CDCl<sub>3</sub>) δ 183.9, 139.6, 133.7, 130.3, 129.3, 128.4, 126.8, 45.4, 43.4, 24.7. **IR (KBr):**  $\nu$  (cm<sup>-1</sup>) 2975, 2928, 1699, 1572, 1474, 1280, 1216, 1091, 792, 684. **HRMS** (ESI) *m/z*: Calculated for C<sub>11</sub>H<sub>12</sub>ClO<sub>2</sub><sup>-</sup> [M-H]<sup>-</sup> 211.0531, found 211.0532.

### 3-(4-bromophenyl)-2,2-dimethylpropanoic acid (7-17)

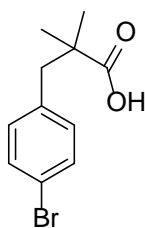

Following the general procedure and using 1-bromo-4-iodobenzene (84.9 mg, 0.3 mmol) as the arylating agent the target compound was obtained as a colorless solid (55.5 mg, 72%). **Mp:** 117-119 °C. **<sup>1</sup>H NMR** (400 MHz, Chloroform-*d*)  $\delta$  7.40 (d,  $J = 8.4$  Hz, 2H), 7.04 (d,  $J = 8.4$  Hz, 2H), 2.84 (s, 2H), 1.20 (s, 6H). **<sup>13</sup>C NMR** (101 MHz, CDCl<sub>3</sub>)  $\delta$  184.0, 136.5, 132.0, 131.2, 120.7, 45.2, 43.4, 24.7. **IR (KBr):**  $\nu$  (cm<sup>-1</sup>) 2970, 2947, 1692, 1489, 1290, 1058, 1011, 835, 550. The spectroscopic properties of this compound are consistent with the data reported in the literature. [6]

### 2,2-dimethyl-3-(4-(trifluoromethoxy)phenyl)propanoic acid (7-18)

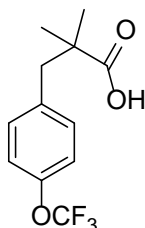

Following the general procedure and using 1-iodo-4-(trifluoromethoxy)benzene (47  $\mu$ L, 0.3 mmol) as the arylating agent, the target compound was obtained as a colorless solid (63.7 mg, 81%). **Mp:** 41-43 °C. **<sup>1</sup>H NMR** (400 MHz, Chloroform-*d*)  $\delta$  7.19 (d,  $J = 8.7$  Hz, 2H), 7.11 (d,  $J = 7.6$  Hz, 2H), 2.89 (s, 2H), 1.21 (s, 6H). **<sup>13</sup>C NMR** (101 MHz, CDCl<sub>3</sub>)  $\delta$  184.2, 148.1 (q,  $J = 1.8$  Hz), 136.3, 131.5, 120.5 (q,  $J = 257.8$  Hz), 120.5, 45.0, 43.4, 24.7. **<sup>19</sup>F NMR** (376 MHz, CDCl<sub>3</sub>)  $\delta$  -57.91. **IR (KBr):**  $\nu$  (cm<sup>-1</sup>) 2988, 2941, 1704, 1510, 1473, 1297, 1255, 1165, 1020, 943, 855, 547. **HRMS** (ESI)  $m/z$ : Calculated for C<sub>12</sub>H<sub>12</sub>F<sub>3</sub>O<sub>3</sub><sup>-</sup> [M-H]<sup>-</sup> 261.0744, found 261.0744.

### 3-(4-cyanophenyl)-2,2-dimethylpropanoic acid (7-19)

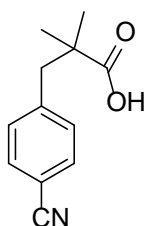

Following the general procedure and using 4-iodobenzonitrile (68.8 mg, 0.3 mmol) as the arylating agent, the target compound was obtained as a colorless solid (46.9 mg, 77%). **Mp:** 85-87 °C. **<sup>1</sup>H NMR** (400 MHz, Chloroform-*d*) δ 7.58 (d, *J* = 8.0 Hz, 2H), 7.29 (d, *J* = 8.0 Hz, 2H), 2.95 (s, 2H), 1.22 (s, 6H). **<sup>13</sup>C NMR** (101 MHz, CDCl<sub>3</sub>) δ 183.5, 143.2, 131.9, 131.0, 118.9, 110.6, 45.7, 43.4, 24.8. **IR (KBr):** ν (cm<sup>-1</sup>) 2982, 2924, 2222, 1694, 1472, 1306, 1217, 1132, 852, 591. **HRMS** (ESI) *m/z*: Calculated for C<sub>12</sub>H<sub>12</sub>NO<sub>2</sub><sup>-</sup> [M-H]<sup>-</sup> 202.0874, found 202.0874.

### 3-(4-fluoro-3-(trifluoromethyl)phenyl)-2,2-dimethylpropanoic acid(7-20)

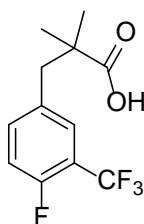

Following the general procedure and using 1-fluoro-4-iodo-2-(trifluoromethyl)benzene (44.8 μL, 0.3 mmol) as the arylating agent, the target compound was obtained as a colorless oil (63.4 mg, 80%). **<sup>1</sup>H NMR** (400 MHz, Chloroform-*d*) δ 7.40 (dd, *J* = 6.9, 2.3 Hz, 1H), 7.36 - 7.32 (m, 1H), 7.10 (t, *J* = 9.3 Hz, 1H), 2.90 (s, 2H), 1.22 (s, 6H). **<sup>13</sup>C NMR** (101 MHz, Chloroform-*d*) δ 183.6, 158.7 (dq, *J* = 256.1 Hz, *J* = 2.2 Hz), 135.5 (d, *J* = 8.3 Hz), 133.8 (d, *J* = 4.1 Hz), 128.5 (dq, *J* = 1.3 Hz, *J* = 4.7 Hz), 122.6 (q, *J* = 272.4 Hz), 117.9 (dq, *J* = 12.4 Hz, *J* = 32.7 Hz), 116.6 (d, *J* = 20.5 Hz), 44.8, 43.5, 24.6. **<sup>19</sup>F NMR** (376 MHz, Chloroform-*d*) δ -61.38 (d, *J* = 12.7 Hz), -117.74 - -117.90 (m). **IR (KBr):** ν (cm<sup>-1</sup>) 2980, 2935, 1700, 1507, 1435, 1321, 1244, 1134, 1058, 835, 667. **HRMS** (ESI) *m/z*: Calculated for C<sub>12</sub>H<sub>11</sub>F<sub>4</sub>O<sub>2</sub><sup>-</sup> [M-H]<sup>-</sup> 263.0701, found 263.0701.

### 3-(3,5-bis(trifluoromethyl)phenyl)-2,2-dimethylpropanoic acid (7-21)

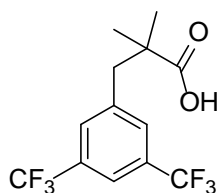

Following the general procedure and using 1-iodo-3,5-bis(trifluoromethyl)benzene (53.2  $\mu\text{L}$ , 0.3 mmol) as the arylating agent, the target compound was obtained as a colorless solid (75.4 mg, 80%). **Mp:** 52-54  $^{\circ}\text{C}$ .  **$^1\text{H NMR}$**  (400 MHz, Chloroform-*d*)  $\delta$  7.76 (s, 1H), 7.62 (s, 2H), 3.01 (s, 2H), 1.24 (s, 6H).  **$^{13}\text{C NMR}$**  (101 MHz, Chloroform-*d*)  $\delta$  183.0, 140.0, 131.3 (q,  $J = 33.0$  Hz), 130.3, 123.3 (q,  $J = 272.6$  Hz), 120.9 - 120.6 (m), 45.3, 43.5, 24.6.  **$^{19}\text{F NMR}$**  (376 MHz,  $\text{CDCl}_3$ )  $\delta$  -62.96. The spectroscopic properties of this compound are consistent with the data reported in the literature.<sup>[4]</sup>

### 3-(3,4-dichlorophenyl)-2,2-dimethylpropanoic acid (7-22)

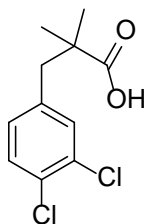

Following the general procedure and using 1,2-dichloro-4-iodobenzene (41.2  $\mu\text{L}$ , 0.3 mmol) as the arylating agent, the target compound was obtained as a colorless oil (54.9 mg, 74%).  **$^1\text{H NMR}$**  (400 MHz, Chloroform-*d*)  $\delta$  7.34 (d,  $J = 8.1$  Hz, 1H), 7.01 (d,  $J = 6.2$  Hz, 1H), 2.84 (s, 2H), 1.21 (s, 6H).  **$^{13}\text{C NMR}$**  (101 MHz,  $\text{CDCl}_3$ )  $\delta$  182.6, 137.8, 132.0, 130.8, 130.0, 129.6, 44.9, 43.3, 24.8. **IR (KBr):**  $\nu$  ( $\text{cm}^{-1}$ ) 2975, 2929, 1699, 1472, 1398, 1278, 1132, 1032, 824, 667. **HRMS** (ESI)  $m/z$ : Calculated for  $\text{C}_{11}\text{H}_{11}\text{Cl}_2\text{O}_2^-$  [M-H] $^-$  245.0142, found 245.0142.

### 2,2-dimethyl-3-(4-methyl-3-nitrophenyl)propanoic acid (7-23)

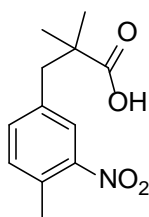

Following the general procedure and using 4-iodo-1-methyl-2-nitrobenzene (78.9 mg, 0.3 mmol) as the arylating agent, the target compound was obtained as a colorless solid (53.4 mg, 75%). **Mp:** 81-83 °C. **<sup>1</sup>H NMR** (400 MHz, Chloroform-*d*) δ 7.79 (s, 1H), 7.31 (d, *J* = 7.9 Hz, 1H), 7.25 (d, *J* = 8.0 Hz, 1H), 2.93 (s, 2H), 2.57 (s, 3H), 1.23 (s, 6H). **<sup>13</sup>C NMR** (101 MHz, CDCl<sub>3</sub>) δ 183.3, 148.9, 136.9, 134.9, 132.5, 131.9, 126.0, 44.9, 43.4, 24.7, 20.1. **IR (KBr):** ν (cm<sup>-1</sup>) 2979, 2930, 1693, 1527, 1343, 1200, 1131, 953, 842, 750. **HRMS** (ESI) *m/z*: Calculated for C<sub>12</sub>H<sub>14</sub>NO<sub>4</sub><sup>-</sup> [M-H]<sup>-</sup> 236.0928, found 236.0928.

### 3-(4-fluoro-3-nitrophenyl)-2,2-dimethylpropanoic acid (7-24)

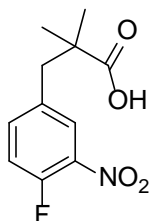

Following the general procedure and using 1-fluoro-4-iodo-2-nitrobenzene (80.1 mg, 0.3 mmol) as the arylating agent, the target compound was obtained as a colorless solid (55.0 mg, 76%). **Mp:** 66-68 °C. **<sup>1</sup>H NMR** (400 MHz, Chloroform-*d*) δ 7.88 (dd, *J* = 7.1, 2.3 Hz, 1H), 7.47-7.43 (m, 1H), 7.22 (dd, *J* = 10.7, 8.5 Hz, 1H), 2.94 (s, 2H), 1.25 (s, 6H). **<sup>13</sup>C NMR** (101 MHz, CDCl<sub>3</sub>) δ 183.2, 154.5 (d, *J* = 264.1 Hz), 137.3 (d, *J* = 8.4 Hz), 136.9 (d, *J* = 7.0 Hz), 134.8 (d, *J* = 4.5 Hz), 127.3 (d, *J* = 2.9 Hz), 118.1 (d, *J* = 20.7 Hz), 44.6, 43.5, 24.7. **<sup>19</sup>F NMR** (376 MHz, CDCl<sub>3</sub>) δ -120.56. **IR (KBr):** ν (cm<sup>-1</sup>) 2991, 2930, 1703, 1534, 1353, 1245, 1141, 840, 547. **HRMS** (ESI) *m/z*: Calculated for C<sub>11</sub>H<sub>11</sub>FNO<sub>4</sub><sup>-</sup> [M-H]<sup>-</sup> 240.0678, found 240.0678.

### 3-(3-(methoxycarbonyl)-4-methylphenyl)-2,2-dimethylpropanoic acid (7-25)

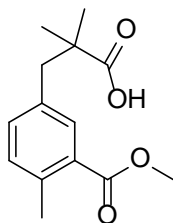

Following the general procedure and using methyl 5-iodo-2-methylbenzoate (82.8 mg, 0.3 mmol) as the arylating agent, the target compound was obtained as a colorless oil (55.6 mg, 74%). **<sup>1</sup>H NMR** (400 MHz, Chloroform-*d*)  $\delta$  11.22 (s, 1H), 7.72 (s, 1H), 7.21 (d, *J* = 7.8 Hz, 1H), 7.14 (d, *J* = 7.8 Hz, 1H), 3.87 (s, 3H), 2.89 (s, 2H), 2.56 (s, 3H), 1.20 (s, 6H). **<sup>13</sup>C NMR** (101 MHz, CDCl<sub>3</sub>)  $\delta$  184.0, 168.2, 138.4, 135.0, 133.8, 132.4, 131.5, 129.2, 51.8, 45.1, 43.4, 24.6, 21.4. **IR (KBr):**  $\nu$  (cm<sup>-1</sup>) 2970, 2926, 1722, 1694, 1435, 1296, 1250, 1197, 1082, 960, 785, 556. **HRMS(ESI) *m/z*:** Calculated for C<sub>14</sub>H<sub>17</sub>O<sub>4</sub><sup>-</sup> [M-H]<sup>-</sup> 249.1132, found 249.1132.

### 2,2-dimethyl-3-phenylpropanoic acid (7-26)

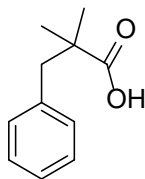

Following the general procedure and using iodobenzene (33.6  $\mu$ L, 0.3 mmol) as the arylating agent, the target compound was obtained as a colorless oil (35.3 mg, 66%). **<sup>1</sup>H NMR** (400 MHz, Chloroform-*d*)  $\delta$  7.28 - 7.16 (m, 5H), 2.89 (s, 2H), 1.20 (s, 6H). **<sup>13</sup>C NMR** (101 MHz, CDCl<sub>3</sub>)  $\delta$  184.4, 137.6, 130.3, 128.1, 126.6, 45.9, 43.5, 24.7. The spectroscopic properties of this compound are consistent with the data reported in the literature.<sup>[7]</sup>



### 2,2-dimethyl-3-(p-tolyl)propanoic acid (7-27)

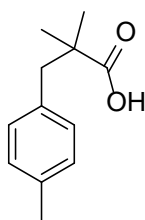

Following the general procedure and using 1-iodo-4-methylbenzene (65.4mg, 0.3 mmol) as the arylating agent the target compound was obtained as a colorless oil (36.9 mg, 64%). **<sup>1</sup>H NMR** (400 MHz, Chloroform-*d*)  $\delta$  7.09 - 7.04 (m, 4H), 2.85 (s, 2H), 2.32 (s, 3H), 1.19 (s, 6H). **<sup>13</sup>C NMR** (101 MHz, CDCl<sub>3</sub>)  $\delta$  184.3, 136.1, 134.5, 130.1, 128.8, 45.5, 43.5, 24.7, 21.1. The spectroscopic properties of this compound are consistent with the data reported in the literature. <sup>[6]</sup>

### 3-(4-isopropylphenyl)-2,2-dimethylpropanoic acid (7-28)

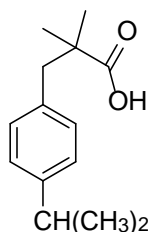

Following the general procedure and using 1-iodo-4-isopropylbenzene (48.4  $\mu$ L, 0.3 mmol) as the arylating agent, the target compound was obtained as a colorless oil (44.9 mg, 68%). **<sup>1</sup>H NMR** (400 MHz, Chloroform-*d*)  $\delta$  7.14 - 7.08 (m, 4H), 2.93 - 2.87 (m, 1H), 2.86 (s, 2H), 1.24 (d,  $J = 6.9$  Hz, 6H), 1.20 (s, 6H). **<sup>13</sup>C NMR** (101 MHz, CDCl<sub>3</sub>)  $\delta$  184.0, 147.0, 134.8, 130.2, 126.1, 45.4, 43.4, 33.7, 24.7, 24.0. **IR (KBr):**  $\nu$  (cm<sup>-1</sup>) 2961, 2927, 1699, 1473, 1282, 1163, 1054, 944, 844, 592. **HRMS** (ESI)  $m/z$ : Calculated for C<sub>14</sub>H<sub>19</sub>O<sub>2</sub><sup>-</sup> [M-H]<sup>-</sup> 219.1391, found 219.1391.

### 3-(4-(tert-butyl)phenyl)-2,2-dimethylpropanoic acid (7-29)

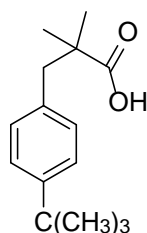

Following the general procedure and using 1-(tert-butyl)-4-iodobenzene (53.2  $\mu\text{L}$ , 0.3 mmol) as the arylating agent, the target compound was obtained as a colorless solid (42.2 mg, 60%). **Mp:** 84-86°C.  **$^1\text{H NMR}$**  (400 MHz, Chloroform-*d*)  $\delta$  7.21 (d,  $J = 8.3$  Hz, 2H), 7.03 (d,  $J = 8.3$  Hz, 2H), 2.79 (s, 2H), 1.23 (s, 9H), 1.13 (s, 6H).  **$^{13}\text{C NMR}$**  (101 MHz,  $\text{CDCl}_3$ )  $\delta$  184.2, 149.3, 134.5, 130.0, 124.9, 45.3, 43.4, 34.4, 31.4, 24.7. **IR (KBr):**  $\nu$  ( $\text{cm}^{-1}$ ) 2961, 2926, 1694, 1511, 1475, 1364, 1220, 1129, 1020, 851, 592. **HRMS (ESI)  $m/z$ :** Calculated for  $\text{C}_{15}\text{H}_{21}\text{O}_2^-$  [M-H] $^-$  233.1547, found 233.1547.

### 3-(4-methoxyphenyl)-2,2-dimethylpropanoic acid (7-30)

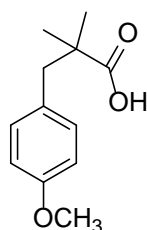

Following the general procedure and using 1-iodo-4-methoxybenzene (70.2 mg, 0.3 mmol) as the arylating agent, the target compound was obtained as a colorless oil (39.4 mg, 63%).  **$^1\text{H NMR}$**  (400 MHz, Chloroform-*d*)  $\delta$  7.08 (d,  $J = 8.6$  Hz, 2H), 6.81 (d,  $J = 8.6$  Hz, 2H), 3.78 (s, 3H), 2.83 (s, 2H), 1.19 (s, 6H).  **$^{13}\text{C NMR}$**  (101 MHz,  $\text{CDCl}_3$ )  $\delta$  184.3, 158.3, 131.2, 129.6, 113.5, 55.2, 45.1, 43.5, 24.6. **IR (KBr):**  $\nu$  ( $\text{cm}^{-1}$ ) 2972, 2934, 1699, 1513, 1473, 1249, 1179, 1037, 821, 547. **HRMS (ESI)  $m/z$ :** Calculated for  $\text{C}_{12}\text{H}_{15}\text{O}_3^-$  [M-H] $^-$  207.1027, found 207.1027.

### 3-(4-ethoxyphenyl)-2,2-dimethylpropanoic acid (7-31)

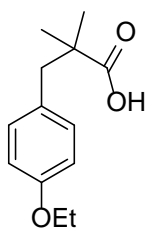

Following the general procedure and using 1-ethoxy-4-iodobenzene (45.7  $\mu\text{L}$ , 0.3 mmol) as the arylating agent, the target compound was obtained as a colorless solid (38.7 mg, 58%). **Mp:** 53-55  $^{\circ}\text{C}$ .  **$^1\text{H NMR}$**  (400 MHz, Chloroform-*d*)  $\delta$  7.07 (d,  $J = 8.5$  Hz, 2H), 6.80 (d,  $J = 8.5$  Hz, 2H), 4.00 (q,  $J = 7.0$  Hz, 2H), 2.82 (s, 2H), 1.40 (t,  $J = 7.0$  Hz, 3H), 1.18 (s, 6H).  **$^{13}\text{C NMR}$**  (101 MHz,  $\text{CDCl}_3$ )  $\delta$  184.3, 157.7, 131.2, 129.5, 114.0, 63.3, 45.1, 43.5, 24.6, 14.9. **IR (KBr):**  $\nu$  ( $\text{cm}^{-1}$ ) 2970, 2928, 1704, 1517, 1474, 1261, 1217, 1131, 1047, 850, 590. **HRMS** (ESI)  $m/z$ : Calculated for  $\text{C}_{13}\text{H}_{17}\text{O}_3^-$  [ $\text{M-H}$ ] $^-$  221.1183, found 221.1182.

### 2,2-dimethyl-3-(*m*-tolyl)propanoic acid (7-32)

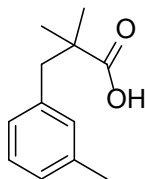

Following the general procedure and using 1-iodo-3-methylbenzene (38.6  $\mu\text{L}$ , 0.3 mmol) as the arylating agent, the target compound was obtained as a colorless oil (34.1 mg, 59%).  **$^1\text{H NMR}$**  (400 MHz, Chloroform-*d*)  $\delta$  7.15 (d,  $J = 8.0$  Hz, 1H), 7.04 (d,  $J = 7.6$  Hz, 1H), 6.99 - 6.95 (m, 2H), 2.85 (s, 2H), 2.31 (s, 3H), 1.20 (s, 6H).  **$^{13}\text{C NMR}$**  (101 MHz,  $\text{CDCl}_3$ )  $\delta$  184.0, 137.5, 137.4, 131.1, 127.9, 127.3, 127.3, 45.8, 43.4, 24.7, 21.4. **IR (KBr):**  $\nu$  ( $\text{cm}^{-1}$ ) 2973, 2925, 1699, 1473, 1286, 1217, 945, 794, 701. **HRMS** (ESI)  $m/z$ : Calculated for  $\text{C}_{12}\text{H}_{15}\text{O}_2^-$  [ $\text{M-H}$ ] $^-$  191.1078, found 191.1078.

### 3-(4-methoxy-3-methylphenyl)-2,2-dimethylpropanoic acid (7-33)

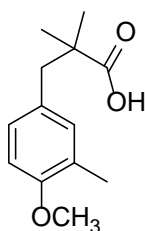

Following the general procedure and using 4-iodo-1-methoxy-2-methylbenzene (74.5 mg, 0.3 mmol) as the arylating agent, the target compound was obtained as a colorless solid (36.7 mg, 55%). **Mp:** 69-71 °C. **<sup>1</sup>H NMR** (400 MHz, Chloroform-*d*) δ 6.98 - 6.91 (m, 2H), 6.72 (d, *J* = 8.2 Hz, 1H), 3.80 (s, 3H), 2.80 (s, 2H), 2.18 (s, 3H), 1.19 (s, 6H). **<sup>13</sup>C NMR** (101 MHz, CDCl<sub>3</sub>) δ 184.2, 156.5, 132.6, 129.2, 128.4, 126.0, 109.5, 55.3, 45.1, 43.5, 24.6, 16.2. **IR (KBr):**  $\nu$  (cm<sup>-1</sup>) 2976, 2937, 1699, 1505, 1456, 1303, 1256, 1137, 1029, 823, 754. **HRMS** (ESI) *m/z*: Calculated for C<sub>13</sub>H<sub>17</sub>O<sub>3</sub><sup>-</sup> [M-H]<sup>-</sup> 221.1183, found 221.1183.

### 3-(2,4-difluorophenyl)-2,2-dimethylpropanoic acid (7-34)

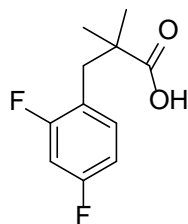

Following the general procedure and using 2,4-difluoro-1-iodobenzene (35.9  $\mu$ L, 0.3 mmol) as the arylating agent, the target compound was obtained as a colorless oil (50.1 mg, 78%). **<sup>1</sup>H NMR** (400 MHz, Chloroform-*d*) δ 7.19 - 7.13 (m, 1H), 6.82 - 6.76 (m, 2H), 2.92 (s, 2H), 1.21 (s, 6H). **<sup>13</sup>C NMR** (101 MHz, CDCl<sub>3</sub>) δ 184.0, 163.0 (dd, *J* = 40.8, 11.9 Hz), 160.4 (dd, *J* = 41.4, 11.9 Hz), 132.9 (dd, *J* = 9.4, 6.1 Hz), 120.5 (dd, *J* = 16.1, 3.7 Hz), 110.9 (dd, *J* = 20.9, 3.7 Hz), 103.6 (dd, *J* = 27.1, 25.0 Hz), 43.5, 37.7, 24.4. **IR (KBr):**  $\nu$  (cm<sup>-1</sup>) 2979, 2937, 1700, 1505, 1426, 1277, 1131, 967, 850, 614. **<sup>19</sup>F NMR** (376 MHz, CDCl<sub>3</sub>) δ -111.06 (d, *J* = 7.2 Hz), -112.27 (d, *J* = 7.3 Hz). **HRMS** (ESI) *m/z*: Calculated for C<sub>11</sub>H<sub>11</sub>F<sub>2</sub>O<sub>2</sub><sup>-</sup> [M-H]<sup>-</sup> 213.0733, found 213.0733.

### 3-(2-fluoro-4-nitrophenyl)-2,2-dimethylpropanoic acid (7-35)

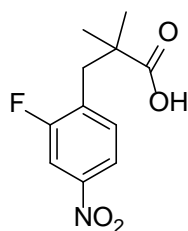

Following the general procedure and using 2-fluoro-1-iodo-4-nitrobenzene (80.1 mg, 0.3 mmol) as the arylating agent, the target compound was obtained as a colorless solid (55.0 mg, 76%). **Mp:** 113-115 °C. **<sup>1</sup>H NMR** (400 MHz, Chloroform-*d*) δ 7.98 (dd, *J* = 8.4, 2.3 Hz, 1H), 7.92 (dd, *J* = 9.4, 2.3 Hz, 1H), 7.42 (t, *J* = 7.8 Hz, 1H), 3.06 (s, 2H), 1.26 (s, 6H). **<sup>13</sup>C NMR** (101 MHz, CDCl<sub>3</sub>) δ 183.4, 160.9 (d, *J* = 250.3 Hz), 147.7 (d, *J* = 9.0 Hz), 132.9 (d, *J* = 4.9 Hz), 132.8 (d, *J* = 16.2 Hz), 118.9 (d, *J* = 3.6 Hz), 111.2 (d, *J* = 28.5 Hz), 43.6, 38.1, 24.6. **<sup>19</sup>F NMR** (376 MHz, CDCl<sub>3</sub>) δ -110.66. **IR (KBr):** ν (cm<sup>-1</sup>) 2988, 2948, 1699, 1527, 1355, 1291, 1230, 1159, 877, 742. **HRMS** (ESI) *m/z*: Calculated for C<sub>11</sub>H<sub>11</sub>FNO<sub>4</sub><sup>-</sup> [M-H]<sup>-</sup> 240.0678, found 240.0678.

### 3-(2-chloro-4-nitrophenyl)-2,2-dimethylpropanoic acid (7-36)

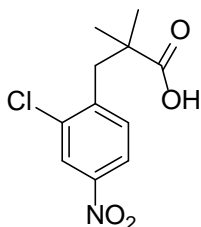

Following the general procedure and using 2-chloro-1-iodo-4-nitrobenzene (85.1 mg, 0.3 mmol) as the arylating agent, the target compound was obtained as a colorless solid (48.7 mg, 63%). **Mp:** 100-102 °C. **<sup>1</sup>H NMR** (400 MHz, Chloroform-*d*) δ 8.27 (d, *J* = 2.3 Hz, 1H), 8.06 (dd, *J* = 8.6, 2.4 Hz, 1H), 7.46 (d, *J* = 8.5 Hz, 1H), 3.22 (s, 2H), 1.29 (s, 6H). **<sup>13</sup>C NMR** (101 MHz, CDCl<sub>3</sub>) δ 183.2, 147.1, 143.4, 136.2, 132.3, 124.8, 121.4, 44.1, 41.5, 24.8. **IR (KBr):** ν (cm<sup>-1</sup>) 2982, 2929, 1699, 1512, 1349, 1219, 1130, 1047, 897, 732. **HRMS** (ESI) *m/z*: Calculated for C<sub>11</sub>H<sub>11</sub>ClNO<sub>4</sub><sup>-</sup> [M-H]<sup>-</sup> 256.0382, found 256.0385.

### 3-(2-bromophenyl)-2,2-dimethylpropanoic acid (7-37)

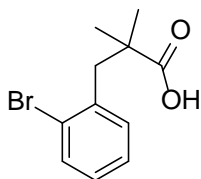

Following the general procedure and using 1-bromo-2-iodobenzene (38.6  $\mu\text{L}$ , 0.3 mmol) as the arylating agent, the target compound was obtained as a colorless solid (52.5 mg, 68%). **Mp:** 85-87  $^{\circ}\text{C}$ .  **$^1\text{H NMR}$**  (400 MHz, Chloroform-*d*)  $\delta$  7.56 (d,  $J = 7.7$  Hz, 1H), 7.28 - 7.20 (m, 2H), 7.11 - 7.05 (m, 1H), 3.17 (s, 2H), 1.27 (s, 6H).  **$^{13}\text{C NMR}$**  (101 MHz,  $\text{CDCl}_3$ )  $\delta$  184.4, 137.5, 133.1, 131.6, 128.2, 127.2, 126.2, 44.1, 43.8, 24.7. The spectroscopic properties of this compound are consistent with the data reported in the literature. <sup>[6]</sup>

### 3-(2-bromo-4-nitrophenyl)-2,2-dimethylpropanoic acid (7-38)

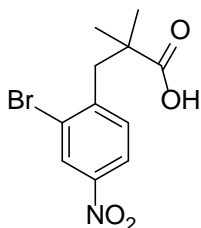

Following the general procedure and using 2-fluoro-1-iodo-4-nitrobenzene (98.4 mg, 0.3 mmol) as the arylating agent, the target compound was obtained as a colorless solid (54.1 mg, 60%). **Mp:** 109-111  $^{\circ}\text{C}$ .  **$^1\text{H NMR}$**  (400 MHz, Chloroform-*d*)  $\delta$  8.45 (d,  $J = 2.4$  Hz, 1H), 8.10 (dd,  $J = 8.6, 2.4$  Hz, 1H), 7.46 (d,  $J = 8.6$  Hz, 1H), 3.26 (s, 2H), 1.30 (s, 6H).  **$^{13}\text{C NMR}$**  (101 MHz,  $\text{CDCl}_3$ )  $\delta$  183.3, 146.9, 145.2, 131.9, 128.1, 126.2, 122.0, 44.1, 43.7, 24.8. **IR (KBr):**  $\nu$  ( $\text{cm}^{-1}$ ) 2983, 2930, 1698, 1517, 1345, 1219, 1121, 1038, 740. **HRMS** (ESI)  $m/z$ : Calculated for  $\text{C}_{11}\text{H}_{11}\text{BrNO}_4$   $[\text{M}-\text{H}]^-$  299.9877, found 299.9878.

### 3-(2-bromo-4-(trifluoromethyl)phenyl)-2,2-dimethylpropanoic acid (7-39)

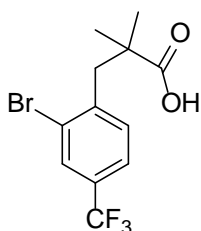

Following the general procedure and using 2-bromo-1-iodo-4-(trifluoromethyl)benzene (105.3 mg, 0.3 mmol) as the arylating agent, the target compound was obtained as a colorless solid (63.4 mg, 65%). **Mp:** 101-103 °C. **<sup>1</sup>H NMR** (400 MHz, Chloroform-*d*) δ 7.84 (s, 1H), 7.49 (d, *J* = 8.0 Hz, 1H), 7.39 (d, *J* = 8.1 Hz, 1H), 3.22 (s, 2H), 1.29 (s, 6H). **<sup>13</sup>C NMR** (101 MHz, CDCl<sub>3</sub>) δ 184.0, 141.8, 131.8, 130.5 (q, *J* = 33.1 Hz), 130.1 (q, *J* = 3.9 Hz), δ 126.2, 123.1 (q, *J* = 273.6 Hz), 124.0 (q, *J* = 3.7 Hz), 44.1, 43.6, 24.7. **<sup>19</sup>F NMR** (376 MHz, CDCl<sub>3</sub>) δ -62.68. **IR (KBr):**  $\nu$  (cm<sup>-1</sup>) 2981, 2927, 1688, 1475, 1320, 1175, 1131, 1078, 835, 683. **HRMS** (ESI) *m/z*: Calculated for C<sub>12</sub>H<sub>11</sub>BrF<sub>3</sub>O<sub>2</sub><sup>-</sup> [M-H]<sup>-</sup> 322.9900, found 322.9900.

### 3-(2-bromo-4-methoxyphenyl)-2,2-dimethylpropanoic acid (7-40)

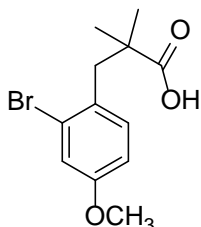

Following the general procedure and using 2-bromo-1-iodo-4-methoxybenzene (93.9 mg, 0.3 mmol) as the arylating agent, the target compound was obtained as a colorless solid (52.6 mg, 61%). **Mp:** 58-60 °C. **<sup>1</sup>H NMR** (400 MHz, Chloroform-*d*) δ 7.16 (d, *J* = 8.6 Hz, 1H), 7.11 (d, *J* = 2.6 Hz, 1H), 6.79 (dd, *J* = 8.6, 2.7 Hz, 1H), 3.78 (s, 3H), 3.09 (s, 2H), 1.25 (s, 6H). **<sup>13</sup>C NMR** (101 MHz, CDCl<sub>3</sub>) δ 183.9, 158.6, 131.9, 129.4, 126.2, 118.0, 113.5, 55.5, 44.1, 43.1, 24.6. **IR (KBr):**  $\nu$  (cm<sup>-1</sup>) 2965, 1689, 1599, 1489, 1286, 1235, 1162, 1153, 1107, 1028, 932. **HRMS** (ESI) *m/z*: Calculated for C<sub>12</sub>H<sub>14</sub>BrO<sub>3</sub><sup>-</sup> [M-H]<sup>-</sup> 285.0132, found 285.0132.

### 3-(2-bromo-4-(trifluoromethoxy)phenyl)-2,2-dimethylpropanoic acid (7-41)

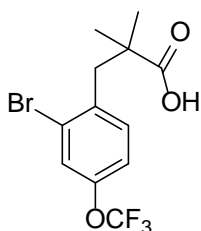

Following the general procedure and using 2-bromo-1-iodo-4-(trifluoromethoxy)benzene (110.1 mg, 0.3 mmol) as the arylating agent, the target compound was obtained as a colorless oil (74.7 mg, 73%). **<sup>1</sup>H NMR** (400 MHz, Chloroform-*d*)  $\delta$  7.46 (d,  $J$  = 2.6 Hz, 1H), 7.30 (d,  $J$  = 8.5 Hz, 1H), 7.11 (dd,  $J$  = 8.6, 2.5 Hz, 1H), 3.16 (s, 2H), 1.27 (s, 6H). **<sup>13</sup>C NMR** (101 MHz, CDCl<sub>3</sub>)  $\delta$  184.3, 147.8 (q,  $J$  = 2.0 Hz), 136.4, 132.1, 126.1, 125.5, 120.4 (q,  $J$  = 258.1 Hz), 119.6, 44.0, 43.1, 24.7. **<sup>19</sup>F NMR** (376 MHz, CDCl<sub>3</sub>)  $\delta$  -57.99. **IR (KBr):**  $\nu$  (cm<sup>-1</sup>) 2981, 2936, 1700, 1487, 1259, 1218, 1169, 1040, 941, 679. **HRMS (ESI)  $m/z$ :** Calculated for C<sub>12</sub>H<sub>11</sub>BrF<sub>3</sub>O<sub>3</sub><sup>-</sup> [M-H]<sup>-</sup> 338.9849, found 338.9850.

### 3-(2-bromo-4-(methoxycarbonyl)phenyl)-2,2-dimethylpropanoic acid (7-42)

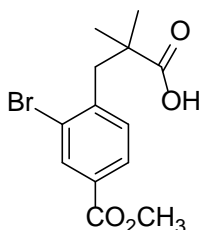

Following the general procedure and using methyl 3-bromo-4-iodobenzoate (102.3 mg, 0.3 mmol) as the arylating agent, the target compound was obtained as a colorless solid (60.5 mg, 64%). **Mp:** 86-88 °C. **<sup>1</sup>H NMR** (400 MHz, Chloroform-*d*)  $\delta$  8.24 (d,  $J$  = 1.7 Hz, 1H), 7.89 (dd,  $J$  = 8.1, 1.8 Hz, 1H), 7.34 (d,  $J$  = 8.0 Hz, 1H), 3.92 (s, 3H), 3.22 (s, 2H), 1.28 (s, 6H). **<sup>13</sup>C NMR** (101 MHz, CDCl<sub>3</sub>)  $\delta$  183.9, 165.7, 142.8, 134.2, 131.4, 130.1, 128.1, 126.1, 52.4, 44.1, 43.8, 24.8. **IR (KBr):**  $\nu$  (cm<sup>-1</sup>) 2984, 2929, 1717, 1699, 1435, 1293, 1266, 1112, 1042, 970, 752. **HRMS (ESI)  $m/z$ :** Calculated for C<sub>13</sub>H<sub>14</sub>BrO<sub>4</sub><sup>-</sup> [M-H]<sup>-</sup> 313.0081, found 313.0081.



### 2,2-dimethyl-3-(2-nitrophenyl)propanoic acid (7-43)

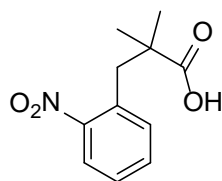

Following the general procedure and using 1-iodo-2-nitrobenzene (38.9  $\mu\text{L}$ , 0.3 mmol) as the arylating agent, the target compound was obtained as a colorless oil (23.5 mg, 35%).  **$^1\text{H NMR}$**  (400 MHz, Chloroform-*d*)  $\delta$  7.83 (d,  $J = 8.1$  Hz, 1H), 7.51 (td,  $J = 7.6, 1.4$  Hz, 1H), 7.41 - 7.36 (m, 2H), 3.37 (s, 2H), 1.19 (s, 6H).  **$^{13}\text{C NMR}$**  (101 MHz,  $\text{CDCl}_3$ )  $\delta$  182.3, 150.9, 133.1, 132.3, 132.1, 127.8, 124.7, 43.8, 40.3, 24.7. **IR (KBr):**  $\nu$  ( $\text{cm}^{-1}$ ) 2977, 2928, 1699, 1527, 1475, 1354, 1286, 1152, 854, 731. The spectroscopic properties of this compound are consistent with the data reported in the literature.<sup>[8]</sup>

### 3-(4-methoxy-2-nitrophenyl)-2,2-dimethylpropanoic acid (7-44)

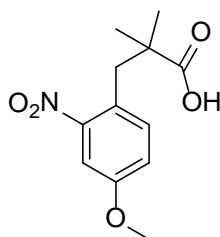

Following the general procedure and using 1-iodo-4-methoxy-2-nitrobenzene (83.7 mg, 0.3 mmol) as the arylating agent, the target compound was obtained as a colorless solid (40.3 mg, 53%). **Mp:** 80-82  $^{\circ}\text{C}$ .  **$^1\text{H NMR}$**  (400 MHz, Chloroform-*d*)  $\delta$  7.34 (s, 1H), 7.26 (d,  $J = 8.3$  Hz, 1H), 7.05 (d,  $J = 8.7$  Hz, 1H), 3.85 (s, 3H), 3.28 (s, 2H), 1.17 (s, 6H).  **$^{13}\text{C NMR}$**  (101 MHz,  $\text{CDCl}_3$ )  $\delta$  183.8, 158.6, 151.2, 133.9, 123.9, 118.9, 109.4, 55.8, 43.9, 39.8, 24.6. **IR (KBr):**  $\nu$  ( $\text{cm}^{-1}$ ) 2976, 2931, 1698, 1533, 1476, 1366, 1293, 1040, 915, 836, 734. **HRMS (ESI)  $m/z$ :** Calculated for  $\text{C}_{12}\text{H}_{14}\text{NO}_5^-$  [ $\text{M-H}$ ] $^-$  252.0877, found 252.0877.

### 2,2-dimethyl-3-(*o*-tolyl)propanoic acid (7-45)

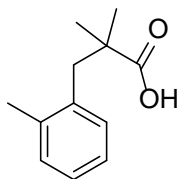

Following the general procedure and using 1-iodo-2-methylbenzene (65.5 mg, 0.3 mmol) as the arylating agent, the target compound was obtained as a colorless solid (57.7 mg, 47%). **Mp:** 35-37 °C. **<sup>1</sup>H NMR** (400 MHz, Chloroform-*d*) δ 7.17 - 7.08 (m, 4H), 2.97 (s, 2H), 2.33 (s, 3H), 1.22 (s, 6H). **<sup>13</sup>C NMR** (101 MHz, CDCl<sub>3</sub>) δ 184.3, 137.1, 136.0, 130.7, 130.5, 126.6, 125.6, 44.0, 41.5, 24.7, 20.3. **IR (KBr):** ν (cm<sup>-1</sup>) 2974, 2931, 1699, 1475, 1292, 1141, 943, 740. **HRMS** (ESI) *m/z*: Calculated for C<sub>12</sub>H<sub>15</sub>O<sub>2</sub><sup>-</sup> [M-H]<sup>-</sup> 191.1078, found 191.1079.

### 2,2-dimethyl-3-(2-methyl-4-nitrophenyl)propanoic acid (7-46)

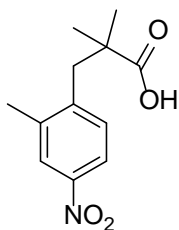

Following the general procedure and using 1-iodo-2-methyl-4-nitrobenzene (78.9 mg, 0.3 mmol) as the arylating agent, the target compound was obtained as a colorless solid (25.6 mg, 36%). **Mp:** 128-130 °C. **<sup>1</sup>H NMR** (400 MHz, Chloroform-*d*) δ 8.05 (s, 1H), 7.97 (d, *J* = 8.5 Hz, 1H), 7.31 (d, *J* = 8.5 Hz, 1H), 3.06 (s, 2H), 2.44 (s, 3H), 1.26 (s, 6H). **<sup>13</sup>C NMR** (101 MHz, CDCl<sub>3</sub>) δ 183.6, 146.5, 143.9, 139.0, 131.3, 125.2, 120.6, 44.0, 41.4, 24.9, 20.4. **IR (KBr):** ν (cm<sup>-1</sup>) 2970, 2920, 1696, 1507, 1475, 1347, 1141, 892, 736. **HRMS** (ESI) *m/z*: Calculated for C<sub>12</sub>H<sub>14</sub>NO<sub>4</sub><sup>-</sup> [M-H]<sup>-</sup> 236.0928, found 236.0928.

### 2,2-dimethyl-3-(2-methyl-5-nitrophenyl)propanoic acid (7-47)

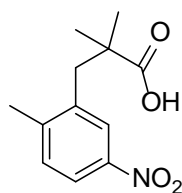

Following the general procedure and using 2-iodo-1-methyl-4-nitrobenzene (78.9 mg) as the arylating agent, the target compound was obtained as a colorless solid (24.2 mg, 34%). **Mp:** 164-166 °C. **<sup>1</sup>H NMR** (400 MHz, Chloroform-*d*) δ 8.04 (s, 1H), 7.99 (d, *J* = 8.4 Hz, 1H), 7.32 (d, *J* = 8.4 Hz, 1H), 3.05 (s, 2H), 2.44 (s, 3H), 1.26 (s, 6H). **<sup>13</sup>C NMR** (101 MHz, CDCl<sub>3</sub>) δ 183.3, 146.1, 145.3, 137.8, 131.3, 125.3, 121.6, 44.0, 41.5, 24.7, 20.6. **IR (KBr):**  $\nu$  (cm<sup>-1</sup>) 2974, 2934, 1688, 1510, 1477, 1350, 1280, 1148, 899, 741. **HRMS** (ESI) *m/z*: Calculated for C<sub>12</sub>H<sub>14</sub>NO<sub>4</sub><sup>-</sup> [M-H]<sup>-</sup> 236.0928, found 236.0928.

### 3-(2-methoxyphenyl)-2,2-dimethylpropanoic acid (7-48)

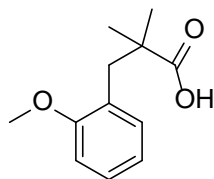

Following the general procedure and using 1-iodo-2-methoxybenzene (39.1 μL, 0.3 mmol) as the arylating agent, the target compound was obtained as a colorless oil (29.9 mg, 48%). **<sup>1</sup>H NMR** (400 MHz, Chloroform-*d*) δ 7.20 (t, *J* = 8.0 Hz, 1H), 7.12 (d, *J* = 7.3 Hz, 1H), 6.88 - 6.82 (m, 2H), 3.75 (s, 3H), 2.96 (s, 2H), 1.18 (s, 6H). **<sup>13</sup>C NMR** (101 MHz, CDCl<sub>3</sub>) δ 184.4, 158.0, 131.9, 127.9, 126.3, 120.1, 110.3, 54.9, 43.4, 39.3, 24.7. **IR (KBr):**  $\nu$  (cm<sup>-1</sup>) 2971, 2935, 1699, 1495, 1289, 1247, 1140, 1031, 753, 548. **HRMS** (ESI) *m/z*: Calculated for C<sub>12</sub>H<sub>15</sub>O<sub>3</sub><sup>-</sup> [M-H]<sup>-</sup> 207.1027, found 207.1027.

### 3-(2-methoxy-4-nitrophenyl)-2,2-dimethylpropanoic acid (7-49)

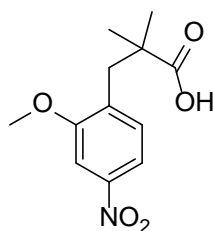

Following the general procedure and using 1-iodo-2-methoxy-4-nitrobenzene (83.8 mg, 0.3 mmol) as the arylating agent the target compound was obtained as a colorless solid (65.4 mg, 86%). **Mp:** 132-134 °C. **<sup>1</sup>H NMR** (400 MHz, Chloroform-*d*)  $\delta$  7.78 (d,  $J = 8.2$  Hz, 1H), 7.70 (s, 1H), 7.28 (d,  $J = 8.3$  Hz, 1H), 3.87 (s, 3H), 3.04 (s, 2H), 1.21 (s, 6H). **<sup>13</sup>C NMR** (101 MHz, CDCl<sub>3</sub>)  $\delta$  183.9, 158.4, 147.8, 134.3, 131.9, 115.4, 105.2, 55.6, 43.5, 39.1, 24.7. **IR (KBr):**  $\nu$  (cm<sup>-1</sup>) 2960, 2931, 1694, 1520, 1461, 1348, 1249, 1032, 963, 815, 741, 591. **HRMS** (ESI)  $m/z$ : Calculated for C<sub>12</sub>H<sub>14</sub>NO<sub>5</sub><sup>-</sup> [M-H]<sup>-</sup> 252.0877, found 252.0879.

### 3-(2-methoxy-5-nitrophenyl)-2,2-dimethylpropanoic acid (7-50)

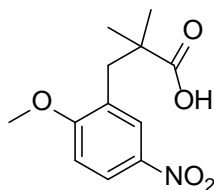

Following the general procedure and using 2-iodo-1-methoxy-4-nitrobenzene (83.8 mg, 0.3 mmol) as the arylating agent the target compound was obtained as a colorless solid (64.5 mg, 85%). **Mp:** 165-167 °C. **<sup>1</sup>H NMR** (400 MHz, Chloroform-*d*)  $\delta$  8.15 (d,  $J = 9.0$  Hz, 1H), 8.06 (s, 1H), 6.91 (d,  $J = 9.1$  Hz, 1H), 3.88 (s, 3H), 3.01 (s, 2H), 1.21 (s, 6H). **<sup>13</sup>C NMR** (101 MHz, CDCl<sub>3</sub>)  $\delta$  183.3, 163.1, 141.0, 127.6, 127.2, 124.5, 109.9, 55.7, 43.3, 39.1, 24.7. **IR (KBr):**  $\nu$  (cm<sup>-1</sup>) 2975, 2930, 1698, 1506, 1477, 1351, 1264, 1150, 1023, 963, 751. **HRMS** (ESI)  $m/z$ : Calculated for C<sub>12</sub>H<sub>14</sub>NO<sub>5</sub><sup>-</sup> [M-H]<sup>-</sup> 252.0877, found 252.0877.

### 3-(2-(methoxycarbonyl)phenyl)-2,2-dimethylpropanoic acid (7-51)

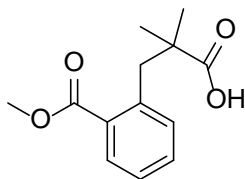

Following the general procedure and using methyl 2-iodobenzoate (44.1  $\mu\text{L}$ , 0.3 mmol) as the arylating agent, the target compound was obtained as a colorless solid (28.4 mg, 40%). **Mp:** 42-44  $^{\circ}\text{C}$ .  **$^1\text{H NMR}$**  (400 MHz, Chloroform-*d*)  $\delta$  7.74 (d,  $J = 7.8$  Hz, 1H), 7.32 (td,  $J = 7.5, 1.5$  Hz, 1H), 7.23 - 7.18 (m, 2H), 3.79 (s, 3H), 3.37 (s, 2H), 1.09 (s, 6H).  **$^{13}\text{C NMR}$**  (101 MHz,  $\text{CDCl}_3$ )  $\delta$  183.9, 168.9, 138.6, 132.2, 131.6, 131.3, 130.3, 126.6, 52.1, 43.8, 41.3, 24.6. **IR (KBr):**  $\nu$  ( $\text{cm}^{-1}$ ) 2986, 2951, 1717, 1698, 1478, 1276, 1120, 1081, 968, 744, 716. **HRMS** (ESI)  $m/z$ : Calculated for  $\text{C}_{13}\text{H}_{15}\text{O}_4^-$  [M-H] $^-$  235.0976, found 235.0976.

### 3-(2-formylphenyl)-2,2-dimethylpropanoic acid (7-52)

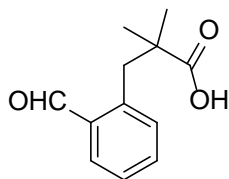

Following the general procedure and using 2-iodobenzaldehyde (69.6 mg, 0.3 mmol) as the arylating agent, the target compound was obtained as a colorless oil (20.4 mg, 33%).  **$^1\text{H NMR}$**  (400 MHz, Chloroform-*d*)  $\delta$  10.29 (s, 1H), 7.87 (d,  $J = 6.2$  Hz, 1H), 7.52 (td,  $J = 7.5, 1.6$  Hz, 1H), 7.42 (t,  $J = 7.5$ , 1H), 7.31 (d,  $J = 7.7$  Hz, 1H), 3.44 (s, 2H), 1.22 (s, 6H).  **$^{13}\text{C NMR}$**  (101 MHz,  $\text{CDCl}_3$ )  $\delta$  192.5, 183.7, 140.1, 135.1, 133.4, 132.5, 131.6, 127.3, 43.9, 39.6, 24.7. **IR (KBr):**  $\nu$  ( $\text{cm}^{-1}$ ) 2980, 2929, 1705, 1474, 1410, 1271, 1130, 912, 734, 659. **HRMS** (ESI)  $m/z$ : Calculated for  $\text{C}_{12}\text{H}_{13}\text{O}_3^-$  [M-H] $^-$  205.0870, found 205.0870.

### 2,2-dimethyl-3-(2-(trifluoromethyl)phenyl)propanoic acid (7-53)

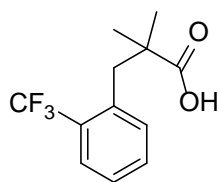

Following the general procedure and using 1-iodo-2-(trifluoromethyl)benzene (42.1  $\mu\text{L}$ , 0.3 mmol) as the arylating agent, the target compound was obtained as a colorless oil (40.6 mg, 55%).  **$^1\text{H NMR}$**  (400 MHz, Chloroform-*d*)  $\delta$  7.65 (d,  $J = 8.5$  Hz, 1H), 7.45 (d,  $J = 7.0$  Hz, 1H), 7.38 - 7.30 (m, 2H), 3.20 (s, 2H), 1.24 (s, 6H).  **$^{13}\text{C NMR}$**  (101 MHz,  $\text{CDCl}_3$ )  $\delta$  185.0, 137.1 (q,  $J = 1.7$  Hz), 131.5, 131.1, 129.5 (q,  $J = 29.1$  Hz), 126.6, 126.3 (q,  $J = 5.9$  Hz), 124.5 (q,  $J = 275$  Hz), 43.4, 40.5, 25.3.  **$^{19}\text{F NMR}$**  (376 MHz,  $\text{CDCl}_3$ )  $\delta$  -57.50. **IR (KBr):**  $\nu$  ( $\text{cm}^{-1}$ ) 2984, 2938, 1700, 1477, 1131, 1121, 1039, 945, 769, 655. **HRMS (ESI)  $m/z$ :** Calculated for  $\text{C}_{12}\text{H}_{12}\text{F}_3\text{O}_2^-$  [M-H] $^-$  245.0795, found 245.0794.

### 3-(9H-fluoren-2-yl)-2,2-dimethylpropanoic acid (7-54)

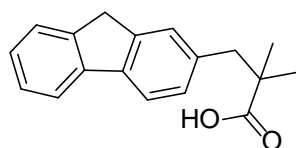

Following the general procedure and using 2-iodo-9H-fluorene (87.7 mg, 0.3 mmol) as the arylating agent, the target compound was obtained as a colorless oil (41.5 mg, 52%).  **$^1\text{H NMR}$**  (400 MHz, Chloroform-*d*)  $\delta$  7.73 (d,  $J = 7.6$  Hz, 1H), 7.68 (d,  $J = 7.8$  Hz, 1H), 7.51 (d,  $J = 7.5$  Hz, 1H), 7.34 (d,  $J = 7.8$  Hz, 2H), 7.28 (d,  $J = 7.4$  Hz, 1H), 7.18 (d,  $J = 7.9$  Hz, 1H), 3.86 (s, 2H), 2.97 (s, 2H), 1.24 (d,  $J = 1.7$  Hz, 6H).  **$^{13}\text{C NMR}$**  (101 MHz,  $\text{CDCl}_3$ )  $\delta$  183.1, 143.2, 143.2, 141.6, 140.2, 136.2, 128.9, 126.9, 126.7, 126.5, 125.0, 119.7, 119.4, 46.1, 43.6, 36.9, 24.8. **IR (KBr):**  $\nu$  ( $\text{cm}^{-1}$ ) 2923, 1695, 1455, 1322, 1291, 1221, 837, 766, 742, 602. **HRMS (ESI)  $m/z$ :** Calculated for  $\text{C}_{18}\text{H}_{17}\text{O}_2^-$  [M-H] $^-$  265.1234, found 265.1235.

### 2,2-dimethyl-3-(naphthalen-1-yl)propanoic acid (7-55)

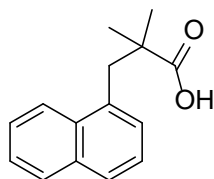

Following the general procedure and using 1-iodonaphthalene (38.9  $\mu\text{L}$ , 0.3 mmol,) as the arylating agent, the target compound was obtained as a colorless oil (26.1 mg, 38%).  **$^1\text{H NMR}$**  (400 MHz, Chloroform-*d*)  $\delta$  8.12 (d,  $J = 8.2$  Hz, 1H), 7.85 (d,  $J = 7.9$  Hz, 1H), 7.76 (d,  $J = 8.0$  Hz, 1H), 7.51 - 7.35 (m, 4H), 3.43 (s, 2H), 1.25 (s, 6H).  **$^{13}\text{C NMR}$**  (101 MHz,  $\text{CDCl}_3$ )  $\delta$  184.1, 134.0, 133.9, 133.1, 128.8, 128.5, 127.4, 125.7, 125.4, 125.2, 124.5, 44.1, 40.8, 25.1. **IR (KBr):**  $\nu$  ( $\text{cm}^{-1}$ ) 2971, 2931, 1693, 1508, 1462, 1287, 1154, 957, 803, 782, 528. **HRMS (ESI)  $m/z$ :** Calculated for  $\text{C}_{15}\text{H}_{15}\text{O}_2^-$  [ $\text{M-H}$ ] $^-$  227.1078, found 227.1078.

### 3-(benzo[d][1,3]dioxol-5-yl)-2,2-dimethylpropanoic acid (7-56)

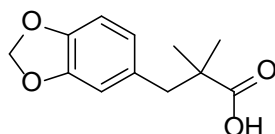

Following the general procedure and using 5-iodobenzo[d][1,3]dioxole (39.0  $\mu\text{L}$ , 0.3 mmol) as the arylating agent, the target compound was obtained as a colorless oil (32.7 mg, 49%).  **$^1\text{H NMR}$**  (400 MHz, Chloroform-*d*)  $\delta$  6.72 (d,  $J = 7.9$  Hz, 1H), 6.66 (d,  $J = 1.7$  Hz, 1H), 6.62 (d,  $J = 7.9$  Hz, 1H), 5.93 (s, 2H), 2.81 (s, 2H), 1.19 (s, 6H).  **$^{13}\text{C NMR}$**  (101 MHz,  $\text{CDCl}_3$ )  $\delta$  184.1, 147.3, 146.3, 131.3, 123.3, 110.6, 108.0, 100.9, 45.6, 43.6, 24.7. **IR (KBr):**  $\nu$  ( $\text{cm}^{-1}$ ) 2974, 1699, 1504, 1490, 1442, 1250, 1191, 1040, 932, 813, 546. **HRMS (ESI)  $m/z$ :** Calculated for  $\text{C}_{12}\text{H}_{13}\text{O}_4^-$  [ $\text{M-H}$ ] $^-$  211.0819, found 211.0819.

### 3-([1,1'-biphenyl]-4-yl)-2,2-dimethylpropanoic acid (7-57)

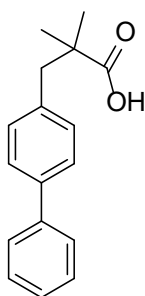

Following the general procedure and using 4-iodo-1,1'-biphenyl (84.1 mg, 0.3 mmol) as the arylating agent, Under the reaction condition of 80°C, the target compound was obtained as a colorless solid (35.1 mg, 46%). **Mp:** 133-135 °C. **<sup>1</sup>H NMR** (400 MHz, Chloroform-*d*) δ 7.56 (d, *J* = 7.5 Hz, 2H), 7.50 (d, *J* = 8.0 Hz, 2H), 7.41 (t, *J* = 7.6 Hz, 2H), 7.31 (t, *J* = 7.4 Hz, 1H), 7.24 (d, *J* = 8.2 Hz, 2H), 2.93 (s, 2H), 1.24 (s, 6H). **<sup>13</sup>C NMR** (101 MHz, CDCl<sub>3</sub>) δ 184.0, 140.9, 139.5, 136.7, 130.7, 128.8, 127.2, 127.0, 126.8, 45.5, 43.5, 24.8. The spectroscopic properties of this compound are consistent with the data reported in the literature.<sup>[9]</sup>

### 3-(4-(((2-(3-benzoylphenyl)propanoyl)oxy)methyl)phenyl)-2,2-dimethylpropanoic acid (7-58)

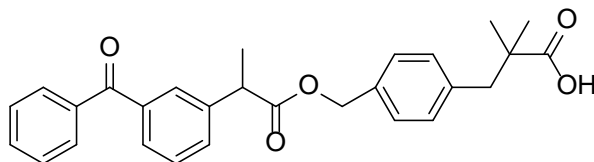

Following the general procedure and using **6-58** (141.1 mg, 0.3 mmol) as the arylating agent, the target compound was obtained as a colorless oil (96.0 mg, 72%). **<sup>1</sup>H NMR** (400 MHz, Chloroform-*d*) δ 7.78 (s, 1H), 7.76 (d, *J* = 5.4 Hz, 2H), 7.67 (d, *J* = 7.7 Hz, 1H), 7.60 - 7.51 (m, 2H), 7.47 - 7.40 (m, 3H), 7.13 (q, *J* = 8.0 Hz, 4H), 5.04 (dd, *J* = 32.0 Hz, *J* = 7.2 Hz, 2H), 3.85 (q, *J* = 7.1 Hz, 1H), 2.86 (s, 2H), 1.54 (d, *J* = 7.2 Hz, 3H), 1.18 (s, 6H). **<sup>13</sup>C NMR** (101 MHz, CDCl<sub>3</sub>) δ 196.6, 183.9, 173.9, 140.7, 137.9, 137.7, 137.5, 134.0, 132.6, 131.6, 130.5, 130.1, 129.3, 129.1, 128.6, 128.3, 127.8, 66.5, 45.4, 45.4, 43.4, 24.7, 18.4. **IR (KBr):** ν (cm<sup>-1</sup>) 2975, 2934, 1731, 1697, 1657, 1596, 1447, 1378, 1281, 1157, 1076, 819, 719. **HRMS** (ESI) *m/z*: Calculated for C<sub>28</sub>H<sub>27</sub>O<sub>5</sub><sup>-</sup> [M-H]<sup>-</sup> 443.1864, found 443.1864.



**3-(4-(((2-(4-isobutylphenyl)propanoyl)oxy)methyl)phenyl)-2,2 dimethylpropanoic acid (7-59)**

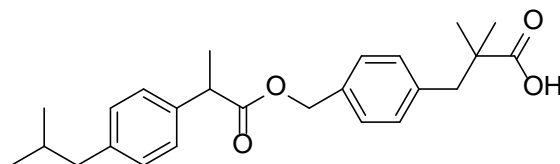

Following the general procedure and using **6-59** (126.7 mg, 0.3 mmol) as the arylating agent, the target compound was obtained as a colorless oil (86.9 mg, 73%). **<sup>1</sup>H NMR** (400 MHz, Chloroform-*d*)  $\delta$  7.19 (d,  $J = 7.9$  Hz, 2H), 7.15 - 7.06 (m, 6H), 5.04 (dd,  $J = 32.0$  Hz,  $J = 7.2$  Hz, 2H), 3.74 (q,  $J = 7.1$  Hz, 1H), 2.87 (s, 2H), 2.44 (d,  $J = 7.2$  Hz, 2H), 1.89 - 1.79 (m, 1H), 1.50 (d,  $J = 7.2$  Hz, 3H), 1.19 (s, 6H), 0.89 (d,  $J = 6.6$  Hz, 6H). **<sup>13</sup>C NMR** (101 MHz, CDCl<sub>3</sub>)  $\delta$  184.0, 174.6, 140.6, 137.7, 137.4, 134.3, 130.4, 129.3, 127.6, 127.2, 66.2, 45.4, 45.2, 45.1, 43.4, 30.2, 24.7, 22.4, 18.5. **IR (KBr):**  $\nu$  (cm<sup>-1</sup>) 2953, 1733, 1697, 1513, 1463, 1366, 1285, 1198, 1155, 1072, 1021, 942, 846. **HRMS** (ESI)  $m/z$ : Calculated for C<sub>25</sub>H<sub>31</sub>O<sub>4</sub><sup>-</sup> [M-H]<sup>-</sup> 395.2228, found 395.2228.

**(S)-3-(4-(((2-(6-methoxynaphthalen-2-yl)propanoyl)oxy)methyl)phenyl)-2,2-dimethylpropanoic acid (7-60)**

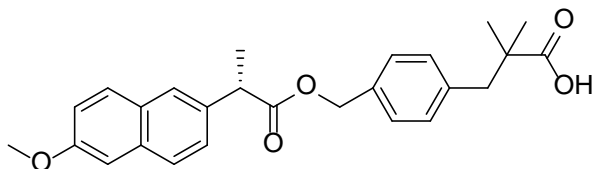

Following the general procedure and using **6-60** (133.9 mg, 0.3 mmol) as the arylating agent, the target compound was obtained as a colorless solid (82.0 mg, 65%). **Mp:** 205-207 °C. **<sup>1</sup>H NMR** (400 MHz, Chloroform-*d*)  $\delta$  7.69 - 7.63 (m, 3H), 7.38 (d,  $J = 8.4$  Hz, 1H), 7.16 - 7.06 (m, 6H), 5.04 (dd,  $J = 32.0$  Hz,  $J = 7.2$  Hz, 2H), 3.91 - 3.86 (m, 4H), 2.85 (s, 2H), 1.57 (d,  $J = 7.1$  Hz, 3H), 1.17 (s, 6H). **<sup>13</sup>C NMR** (101 MHz, CDCl<sub>3</sub>)  $\delta$  184.1, 174.6, 157.7, 137.5, 135.6, 134.3, 133.7, 130.4, 129.3, 129.0, 127.9, 127.2, 126.3, 126.0, 119.0, 105.6, 66.4, 55.3, 45.5, 45.5, 43.4, 24.7, 18.6. **IR (KBr):**  $\nu$  (cm<sup>-1</sup>) 2918, 1733, 1713, 1609, 1492, 1309, 1266, 1207, 1178, 1152, 1079, 1018, 855. **HRMS** (ESI)  $m/z$ : Calculated for C<sub>26</sub>H<sub>27</sub>O<sub>5</sub><sup>-</sup> [M-H]<sup>-</sup> 419.1864, found 419.1864.

**2,2-dimethyl-3-(4-((((8R,9S,13S,14S)-13-methyl-17-oxo 7,8,9,11,12,13,14,15,16,17-decahydro-6H-cyclopenta[a]phenanthren-3-yl)oxy)carbonyl)phenyl)propanoic acid (7-61)**

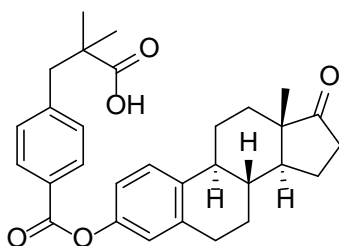

Following the general procedure and using **6-61** (150.2 mg, 0.3 mmol) as the arylating agent, the target compound was obtained as a colorless oil (111.1 mg, 78%). <sup>1</sup>H NMR (400 MHz, Chloroform-*d*) δ 8.10 (d, *J* = 8.3 Hz, 2H), 7.32 (dd, *J* = 8.5, 3.7 Hz, 3H), 6.96 (dd, *J* = 8.4, 2.6 Hz, 1H), 6.93 (d, *J* = 2.5 Hz, 1H), 2.99 (s, 2H), 2.96 - 2.90 (m, 2H), 2.52 (dd, *J* = 19.0, 8.6 Hz, 1H), 2.46 - 2.39 (m, 1H), 2.31 (td, *J* = 10.7, 4.1 Hz, 1H), 2.21 - 1.95 (m, 4H), 1.69 - 1.42 (m, 6H), 1.24 (s, 6H), 0.92 (s, 3H). <sup>13</sup>C NMR (101 MHz, CDCl<sub>3</sub>) δ 221.2, 183.3, 165.4, 148.9, 143.8, 138.1, 137.4, 130.5, 130.0, 128.0, 126.5, 121.7, 118.9, 50.4, 48.0, 45.8, 44.2, 43.5, 38.0, 35.9, 31.6, 29.4, 26.4, 25.8, 24.8, 21.6, 13.9. IR (KBr): ν (cm<sup>-1</sup>) 2973, 2934, 1730, 1696, 1605, 1453, 1391, 1323, 1263, 1216, 1150, 1030, 851. HRMS (ESI) *m/z*: Calculated for C<sub>30</sub>H<sub>33</sub>O<sub>5</sub><sup>-</sup> [M-H]<sup>-</sup> 473.2333, found 473.2333.

**3-(4-((((1R,2S,5R)-2-isopropyl-5-methylcyclohexyl)oxy)carbonyl)phenyl)-2,2-dimethylpropanoic acid (7-62)**

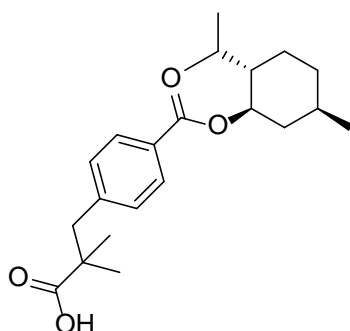

Following the general procedure and using **6-62** (115.9 mg, 0.3 mmol) as the arylating agent, the target compound was obtained as a colorless oil (83.3 mg, 77%). <sup>1</sup>H NMR (400 MHz, Chloroform-*d*) δ 7.96 (d, *J* = 7.9 Hz, 2H), 7.25 (d, *J* = 7.9 Hz, 2H), 4.93 (td, *J* = 10.9, 4.3 Hz, 1H), 2.95 (s, 2H), 2.12 (d, *J* = 12.3 Hz, 1H), 2.00 - 1.93 (m,

1H), 1.72 (d,  $J = 11.2$  Hz, 2H), 1.61 - 1.51 (m, 2H), 1.22 (s, 6H), 1.16 - 1.04 (m, 2H), 0.92 (dd,  $J = 6.8, 4.4$  Hz, 7H), 0.79 (d,  $J = 6.9$  Hz, 3H).  $^{13}\text{C}$  NMR (101 MHz,  $\text{CDCl}_3$ )  $\delta$  183.8, 166.1, 142.8, 130.3, 129.4, 129.2, 74.8, 47.3, 45.7, 43.4, 41.0, 34.3, 31.5, 26.5, 24.8, 24.7, 23.6, 22.1, 20.8, 16.5. **IR (KBr):**  $\nu$  ( $\text{cm}^{-1}$ ) 2953, 2926, 1698, 1611, 1455, 1272, 1178, 1111, 1096, 1020, 960, 706. **HRMS** (ESI)  $m/z$ : Calculated for  $\text{C}_{22}\text{H}_{31}\text{O}_4^-$   $[\text{M-H}]^-$  359.2228, found 359.2228.

**2,2-dimethyl-3-(4-(((3aS,5aR,8aR,8bS)-2,2,7,7-tetramethyltetrahydro-3aH-bis([1,3]dioxolo)[4,5-b:4',5'-d]pyran-3a-yl)methoxy)carbonyl)phenyl)propanoic acid (7-63)**

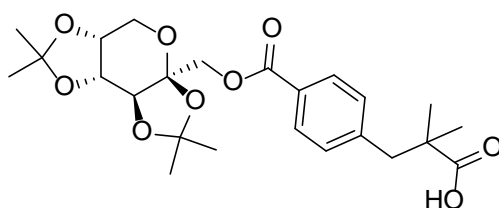

Following the general procedure and using **6-63** (147.1 mg, 0.3 mmol) as the arylating agent, the target compound was obtained as a colorless solid (115.7 mg, 83%). **Mp:** 56-58 °C.  $^1\text{H}$  NMR (400 MHz, Chloroform-*d*)  $\delta$  8.00 (d,  $J = 8.1$  Hz, 2H), 7.25 (d,  $J = 8.1$  Hz, 2H), 4.70 - 4.62 (m, 2H), 4.47 (d,  $J = 2.6$  Hz, 1H), 4.33 (d,  $J = 11.8$  Hz, 1H), 4.26 (d,  $J = 8.0$  Hz, 1H), 3.96 (dd,  $J = 13.1, 1.9$  Hz, 1H), 3.81 (d,  $J = 13.0$  Hz, 1H), 2.95 (s, 2H), 1.55 (s, 3H), 1.45 (s, 3H), 1.39 (s, 3H), 1.34 (s, 3H), 1.21 (s, 6H).  $^{13}\text{C}$  NMR (101 MHz,  $\text{CDCl}_3$ )  $\delta$  183.4, 166.0, 143.3, 130.3, 129.6, 128.3, 109.2, 108.8, 101.7, 70.8, 70.6, 70.1, 65.4, 61.3, 45.7, 43.4, 26.5, 25.9, 25.5, 24.7, 24.0. **IR (KBr):**  $\nu$  ( $\text{cm}^{-1}$ ) 2991, 2938, 1726, 1698, 1611, 1457, 1373, 1275, 1251, 1206, 1111, 1067, 1020, 863. **HRMS** (ESI)  $m/z$ : Calculated for  $\text{C}_{24}\text{H}_{31}\text{O}_9^-$   $[\text{M-H}]^-$  463.1974, found 463.1974.

**2,2-dimethyl-3-(4-((((1R,2R,4S)-1,3,3-trimethylbicyclo[2.2.1]heptan-2-yl)oxy)carbonyl)phenyl)propanoic acid (7-64)**

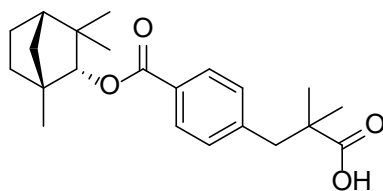

Following the general procedure and using **6-64** (115.3 mg, 0.3 mmol) as the arylating agent, the target compound was obtained as a colorless solid (86.1 mg, 80%). **Mp:** 133-135 °C. **<sup>1</sup>H NMR** (400 MHz, Chloroform-*d*) δ 7.99 (d, *J* = 8.0 Hz, 2H), 7.26 (d, *J* = 8.0 Hz, 2H), 4.61 (s, 1H), 2.96 (s, 2H), 1.97 - 1.90 (m, 1H), 1.82 - 1.74 (m, 2H), 1.66 (d, *J* = 10.2 Hz, 1H), 1.56 - 1.46 (m, 1H), 1.26 - 1.23 (m, 2H), 1.23 (s, 6H), 1.18 (s, 3H), 1.11 (s, 3H), 0.85 (s, 3H). **<sup>13</sup>C NMR** (101 MHz, CDCl<sub>3</sub>) δ 183.9, 166.9, 142.9, 130.4, 129.3, 129.1, 86.6, 48.6, 48.4, 45.7, 43.4, 41.5, 39.9, 29.8, 26.9, 25.9, 24.8, 24.7, 20.4, 19.5. **IR (KBr):**  $\nu$  (cm<sup>-1</sup>) 2950, 1705, 1693, 1610, 1470, 1419, 1368, 1279, 1258, 1182, 1116, 1023, 864, 735. **HRMS** (ESI) *m/z*: Calculated for C<sub>22</sub>H<sub>29</sub>O<sub>4</sub><sup>-</sup> [M-H]<sup>-</sup> 357.2071, found 357.2071.

**2,2-dimethyl-3-(4-((((1S,2R,4S)-1,7,7-trimethylbicyclo[2.2.1]heptan-2-yl)oxy)carbonyl)phenyl)propanoic acid (7-65)**

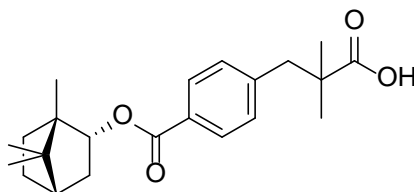

Following the general procedure and using **6-65** (115.3 mg, 0.3 mmol) as the arylating agent, the target compound was obtained as a colorless solid (81.7 mg, 76%). **Mp:** 127-129 °C. **<sup>1</sup>H NMR** (400 MHz, Chloroform-*d*) δ 7.98 (d, *J* = 8.0 Hz, 2H), 7.26 (d, *J* = 8.1 Hz, 2H), 5.10 (dt, *J* = 9.8, 2.8 Hz, 1H), 2.96 (s, 2H), 2.51 - 2.43 (m, 1H), 2.16 - 2.10 (m, 1H), 1.83 - 1.76 (m, 1H), 1.73 (t, *J* = 4.5 Hz, 1H), 1.44 - 1.36 (m, 1H), 1.33 - 1.26 (m, 1H), 1.22 (s, 6H), 1.11 (dd, *J* = 13.8, 3.5 Hz, 1H), 0.96 (s, 3H), 0.91 (s, 6H). **<sup>13</sup>C NMR** (101 MHz, CDCl<sub>3</sub>) δ 183.8, 166.8, 142.9, 130.3, 129.3, 129.3, 80.5, 49.1, 47.9, 45.7, 45.0, 43.4, 36.9, 28.1, 27.4, 24.8, 24.7, 19.7, 18.9, 13.6. **IR (KBr):**  $\nu$

( $\text{cm}^{-1}$ ) 2953, 1708, 1695, 1609, 1471, 1407, 1364, 1277, 1253, 1178, 1112, 1018, 860, 733. **HRMS** (ESI)  $m/z$ : Calculated for  $\text{C}_{22}\text{H}_{29}\text{O}_4^-$   $[\text{M}-\text{H}]^-$  357.2071, found 357.2071.

**2-(4-(methoxycarbonyl)benzyl)-3-(4-(methoxycarbonyl)phenyl)-2-methylpropanoic acid (8-1)**

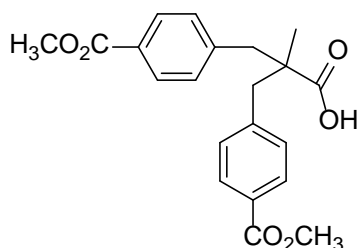

**Mp:** 171-173 °C.  **$^1\text{H}$  NMR** (400 MHz, Chloroform-*d*)  $\delta$  7.96 (d,  $J = 7.9$  Hz, 4H), 7.25 (d,  $J = 7.3$  Hz, 4H), 3.91 (s, 6H), 3.28 (d,  $J = 13.1$  Hz, 2H), 2.81 (d,  $J = 13.1$  Hz, 2H), 1.05 (s, 3H).  **$^{13}\text{C}$  NMR** (101 MHz,  $\text{CDCl}_3$ )  $\delta$  181.0, 167.0, 142.3, 130.3, 129.5, 128.8, 52.1, 48.7, 45.7, 19.9. **IR (KBr):**  $\nu$  ( $\text{cm}^{-1}$ ) 2993, 2952, 1713, 1694, 1430, 1280, 1105, 859, 705. **HRMS** (ESI)  $m/z$ : Calculated for  $\text{C}_{21}\text{H}_{21}\text{O}_6^-$   $[\text{M}-\text{H}]^-$  369.1344, found 369.1345.

## 6. Synthetic Applications

### 6.1. Gram-Scale Experiments

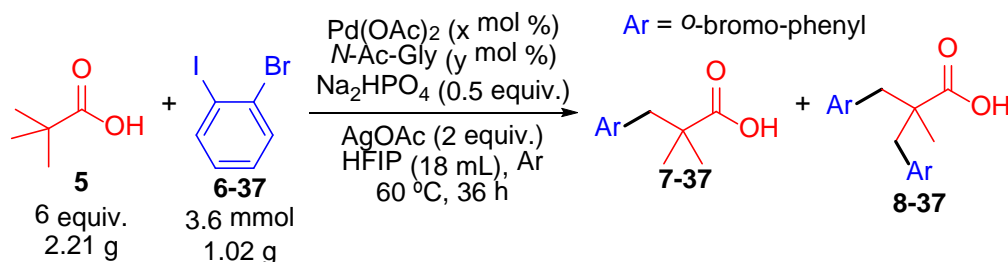

| entry | x   | y  | Yield (%) <sup>a</sup> |       |
|-------|-----|----|------------------------|-------|
|       |     |    | 7-37                   | 8-37  |
| 1     | 10  | 20 | 50                     | 9.8   |
| 2     | 5   | 10 | 58 (55)                | 2.5   |
| 3     | 2.5 | 5  | 54 (52)                | trace |

<sup>a</sup>All data represent the average of two independent experiments. Yields were determined by <sup>1</sup>H-NMR spectroscopic analysis of crude mixtures using 1,3,5-trimethoxybenzene (202 mg, 1.2 mmol) as internal standard, isolated yields are given in parentheses.

**General Procedure for Gram-Scale Experiments:** In a glovebox filled with argon, a clean, oven-dried screw cap reaction tube with previously placed magnetic stir-bar was charged with pivalic acid (2.21 g, 21.6 mmol, 6 equiv.), aryl iodide (3.6 mmol), Pd(OAc)<sub>2</sub> (20.4 mg, 0.09 mmol, 2.5 mol%), *N*-Ac-Gly-OH (21.3 mg, 0.18 mmol, 5 mol%), AgOAc (1.21 g, 7.2 mmol, 2 equiv.) and Na<sub>2</sub>HPO<sub>4</sub> (255.6 mg, 1.8 mmol, 0.5 equiv.), followed by addition of HFIP (18 mL). The vessel was sealed and moved out of the glovebox, and the reaction was stirred at room temperature for 10 minutes. Then the reaction vessel was placed in a pre-heated (60 °C) oil bath and stirring was continued at this temperature for 36 h. The reaction mixture was allowed to cool to room temperature. The resulting mixture was filtered through a celite bed using ethyl acetate as the eluent. After concentration under reduced pressure, the residue was purified by column chromatography on silica gel (petroleum-ether / ethyl acetate / formic acid = 20:1:0.005) to give the desired arylated product.

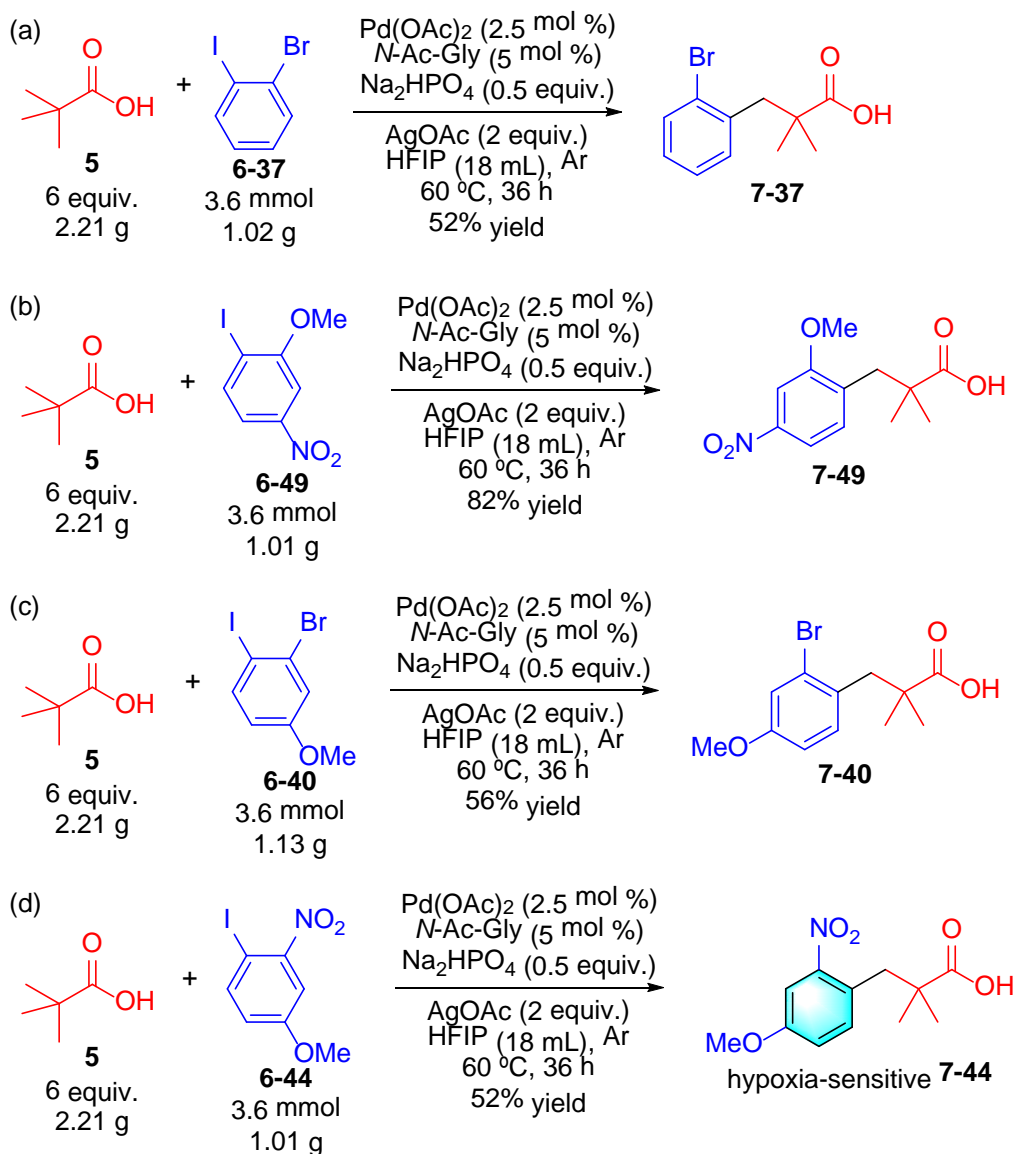

## 6.2. Application Potential of Developed Methodology

### 6.2.1 Synthesis of 2,2-dimethyl-3-(2-(4,4,5,5-tetramethyl-1,3,2-dioxaborolan-2-yl)phenyl)propanoic acid

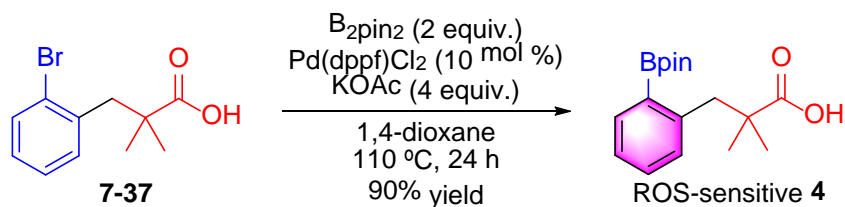

**2,2-dimethyl-3-(2-(4,4,5,5-tetramethyl-1,3,2-dioxaborolan-2-yl)phenyl)propanoic acid (ROS sensitive-4)**

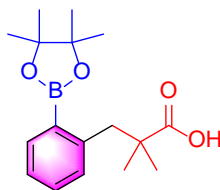

To a solution of 3-(2-bromophenyl)-2,2-dimethylpropanoic acid **7-37** (77.2 mg, 0.3 mmol) in degassed 1,4-dioxane (3 mL) was added bis(pinacolato)diboron (152.4 mg, 0.6 mmol), Pd(dppf)Cl<sub>2</sub> (22.0 mg, 0.03 mmol), and potassium acetate (117.8 mg, 1.2 mmol) and the mixture was refluxed for 24 h under an atmosphere of nitrogen. The reaction mixture was allowed to cool to room temperature and AcOH (1 mL) was added. The resulting mixture was filtered through a celite bed using ethyl acetate as the eluent. The reaction mixture was concentrated under reduced pressure and the residue was purified by column chromatography on silica gel (petroleum-ether / ethyl acetate / formic acid = 16:1:0.005) to give a pale-yellow solid (82.1 mg, 90%). **Mp:** 99-101 °C. **<sup>1</sup>H NMR** (400 MHz, Chloroform-*d*) δ 7.79 (d, *J* = 7.0 Hz, 1H), 7.33 (td, *J* = 7.5, 1.6 Hz, 1H), 7.21 (t, *J* = 7.3 Hz, 2H), 3.34 (s, 2H), 1.35 (s, 12H), 1.17 (s, 6H). **<sup>13</sup>C NMR** (101 MHz, CDCl<sub>3</sub>) δ 184.7, 144.1, 135.9, 130.5, 130.4, 125.7, 83.6, 43.7, 43.2, 24.9, 24.5. The spectroscopic properties of this compound are consistent with the data reported in the literature.<sup>[7]</sup>



**6.2.2 Synthesis of 3-(2-acetoxy-4-nitrophenyl)-2,2-dimethylpropanoic acid (esterase sensitive-10) and 3-(2-((bis(benzyloxy)phosphoryl)oxy)-4-nitrophenyl)-2,2-dimethylpropanoic acid (phosphatase sensitive-11)**

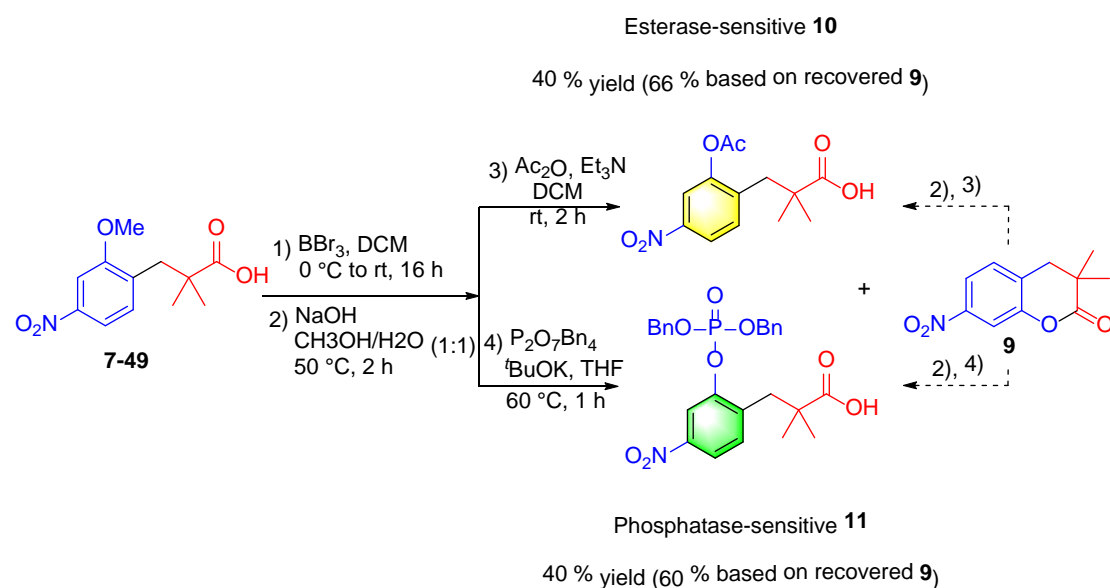

In an argon flushed 100 mL round bottom flask, 3-(2-methoxy-4-nitrophenyl)-2,2-dimethylpropanoic acid **7-49** (759 mg, 3.0 mmol) was dissolved in CH<sub>2</sub>Cl<sub>2</sub> (40 mL) and the solution was cooled to 0 °C. A solution of BBr<sub>3</sub> in CH<sub>2</sub>Cl<sub>2</sub> (2 M, 3.0 mL, 6.0 mmol, 2.0 eq) was added dropwise at this temperature. The mixture was allowed to warm to room temperature and stirring was continued for 16 hours. The reaction was quenched through the addition of ice. The phases were separated and the aqueous phase was extracted with CH<sub>2</sub>Cl<sub>2</sub> (3 × 50 mL). The combined organic phases were concentrated under reduced pressure to give the crude product, which was added to a cooled solution of NaOH (480 mg, 12 mmol, 4 eq) in CH<sub>3</sub>OH/H<sub>2</sub>O (1:1 v/v, 20 mL). The reaction was heated to 50 °C for 2 h. After cooling to room temperature, the pH was adjusted to 2-3 with 1N HCl. The mixture was extracted with EtOAc (3 × 40 mL). The combined organic layers were dried over anhydrous Na<sub>2</sub>SO<sub>4</sub>, filtered, and concentrated under reduced pressure. The crude product was directly used for next step synthesis without further purification.

### 3-(2-acetoxy-4-nitrophenyl)-2,2-dimethylpropanoic acid (esterase sensitive-10)

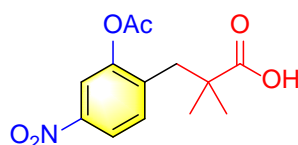

The crude product obtained in the previous step was added to 7 mL of dry CH<sub>2</sub>Cl<sub>2</sub> followed by addition of Ac<sub>2</sub>O (855 μL, 9.0 mmol, 3.0 eq) and Et<sub>3</sub>N (1.26 mL, 9.0 mmol, 3.0 eq). After stirring at room temperature for 2h, the reaction was quenched through the addition of H<sub>2</sub>O (10 mL). The phases were separated and the aqueous phase was extracted with CH<sub>2</sub>Cl<sub>2</sub> (3 × 10 mL). The combined organic phases were dried over anhydrous Na<sub>2</sub>SO<sub>4</sub>, filtered, and concentrated under reduced pressure to give the crude product. Purification was achieved using column chromatography on silica gel (petroleum-ether / ethyl acetate / formic acid = 20:1:0.005) to give **10** as a colorless solid (338 mg, 40 %) and compound **9** (258 mg, 39 %). **Mp**: 92-94 °C. **<sup>1</sup>H NMR** (400 MHz, Chloroform-*d*) δ 8.04 (dd, *J* = 8.5, 2.4 Hz, 1H), 8.01 (d, *J* = 2.3 Hz, 1H), 7.44 (d, *J* = 8.4 Hz, 1H), 2.96 (s, 2H), 2.36 (s, 3H), 1.24 (s, 6H). **<sup>13</sup>C NMR** (101 MHz, CDCl<sub>3</sub>) δ 183.4, 168.7, 149.6, 147.2, 137.4, 132.7, 120.4, 118.3, 43.5, 39.5, 24.8, 20.9. **IR (KBr)**: ν (cm<sup>-1</sup>) 2981, 2935, 1769, 1695, 1523, 1347, 1201, 1166, 1076, 947, 742. **HRMS (ESI) *m/z***: Calculated for C<sub>13</sub>H<sub>14</sub>NO<sub>6</sub><sup>-</sup> [M-H]<sup>-</sup> 280.0827, found 280.0827.

### 3-(2-((bis(benzyloxy)phosphoryl)oxy)-4-nitrophenyl)-2,2-dimethylpropanoic acid (phosphatase sensitive-11) <sup>[10]</sup>

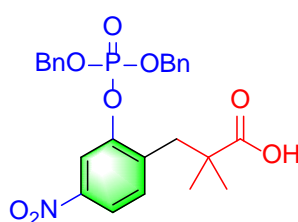

The crude product obtained in the previous step was added to 20 mL of dry THF followed by addition of solid potassium tert-butoxide (744.0 mg, 6.6 mmol, 2.2 eq). The mixture was heated to 60 °C in an oil bath for approximately 5 min. To this warm reaction mixture was added the solid tetrabenzyl pyrophosphate (1.78 g, 3.3 mmol, 1.1 eq). Approximately 10 min after the addition of the tetrabenzyl pyrophosphate, an insoluble white precipitate formed. The reaction mixture was kept under continuous

stirring at 60 °C for 1h and then allowed to cool to room temperature. To the reaction milieu was added hexane (60 mL), and the insoluble white precipitate was removed by filtration. After removal of all solvents by rotary evaporation, a viscous residue was obtained. Purification was achieved using column chromatography on silica gel (petroleum-ether / ethyl acetate / formic acid = 20:1:0.005) to give **11** as a colorless solid (599 mg, 40 %) and compound **9** (219 mg, 33%). **Mp**: 136-138 °C. **<sup>1</sup>H NMR** (400 MHz, Chloroform-*d*) δ 8.09 (s, 1H), 7.88 (d, *J* = 8.5 Hz, 1H), 7.32 (s, 11H), 5.21 - 5.11 (m, 4H), 2.96 (s, 2H), 1.15 (s, 6H). **<sup>13</sup>C NMR** (101 MHz, Chloroform-*d*) δ 181.9, 149.4 (d, *J* = 7.0 Hz), 147.1, 136.9 (d, *J* = 7.3 Hz), 134.9 (d, *J* = 6.2 Hz), 132.6, 129.0, 128.7, 128.3, 119.5, 115.1 (d, *J* = 2.2 Hz), 70.7 (d, *J* = 5.9 Hz), 43.5, 39.0, 24.8. **<sup>31</sup>P NMR** (162 MHz, CDCl<sub>3</sub>) δ -6.63. **IR (KBr)**: ν (cm<sup>-1</sup>) 2974, 1712, 1522, 1342, 1243, 1176, 1143, 1009, 970, 696. **HRMS** (ESI) *m/z*: Calculated for C<sub>25</sub>H<sub>25</sub>NO<sub>8</sub>P<sup>-</sup> [M-H]<sup>-</sup> 498.1323, found 498.1319.

### 3,3-dimethyl-7-nitrochroman-2-one (**9**)

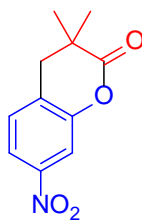

Compound **9** was obtained as a colorless solid. Purification was achieved by column chromatography on silica gel (petroleum ether / ethyl acetate = 16:1). **Mp**: 126-128 °C. **<sup>1</sup>H NMR** (400 MHz, Chloroform-*d*) δ 7.99 (dd, *J* = 8.3, 2.2 Hz, 1H), 7.87 (d, *J* = 2.2 Hz, 1H), 7.39 (d, *J* = 8.3 Hz, 1H), 3.00 (s, 2H), 1.33 (s, 6H). **<sup>13</sup>C NMR** (101 MHz, CDCl<sub>3</sub>) δ 171.8, 151.7, 147.8, 129.6, 129.3, 119.2, 111.8, 38.3, 36.8, 24.6. **IR (KBr)**: ν (cm<sup>-1</sup>) 2977, 2939, 1777, 1513, 1421, 1336, 1264, 1231, 1121, 1091, 1019, 905, 753. **HRMS** (ESI) *m/z*: Calculated for C<sub>11</sub>H<sub>12</sub>NO<sub>4</sub><sup>+</sup> [M+H]<sup>+</sup> 222.0761, found 222.0761.

### 6.2.3 Synthesis of 2,2-dimethyl-3-(4-(prop-2-yn-1-yloxy)-2-(4,4,5,5-tetramethyl-1,3,2-dioxaborolan-2-yl)phenyl)propanoic acid (ROS sensitive-13)

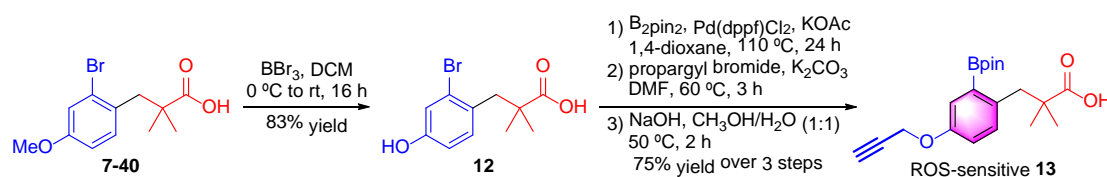

### 3-(2-bromo-4-hydroxyphenyl)-2,2-dimethylpropanoic acid (12)

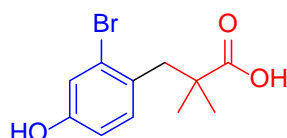

In an argon flushed 100 mL round bottom flask, 3-(2-bromo-4-methoxyphenyl)-2,2-dimethylpropanoic acid **7-40** (1.5 g, 5.2 mmol) was dissolved in CH<sub>2</sub>Cl<sub>2</sub> (50 mL) and the solution was cooled to 0 °C. A solution of BBr<sub>3</sub> in CH<sub>2</sub>Cl<sub>2</sub> (2 M, 5.2 mL, 10.4 mmol, 2 eq) was added dropwise at this temperature. The mixture was allowed to warm to room temperature and stirring was continued for 16 hours. The reaction was quenched through the addition of ice. The phases were separated and the aqueous phase was extracted with CH<sub>2</sub>Cl<sub>2</sub> (3 × 60 mL). The combined organic phases were dried over anhydrous Na<sub>2</sub>SO<sub>4</sub>, filtered, and concentrated under reduced pressure to give the crude product. Purification was achieved using column chromatography on silica gel (petroleum-ether / ethyl acetate / formic acid = 15:1:0.005) to give a colorless solid (1.18 g, 83 %). **Mp**: 125-127 °C. **<sup>1</sup>H NMR** (400 MHz, Methanol-*d*<sub>4</sub>) δ 7.09 (d, *J* = 8.5 Hz, 1H), 7.04 (d, *J* = 2.5 Hz, 1H), 6.71 (dd, *J* = 8.5, 2.6 Hz, 1H), 3.03 (s, 2H), 1.19 (s, 6H). **<sup>13</sup>C NMR** (101 MHz, Methanol-*d*<sub>4</sub>) δ 180.6, 156.3, 131.7, 128.3, 125.6, 119.2, 114.3, 43.8, 42.9, 24.1. **IR (KBr)**:  $\nu$  (cm<sup>-1</sup>) 3300, 2972, 1682, 1604, 1491, 1344, 1242, 1038, 994, 821. **HRMS** (ESI) *m/z*: Calculated for C<sub>11</sub>H<sub>12</sub>BrO<sub>3</sub><sup>-</sup> [M-H]<sup>-</sup> 270.9975, found 270.9981.

**2,2-dimethyl-3-(4-(prop-2-yn-1-yloxy)-2-(4,4,5,5-tetramethyl-1,3,2-dioxaborolan-2-yl)phenyl)propanoic acid (ROS sensitive-13)**

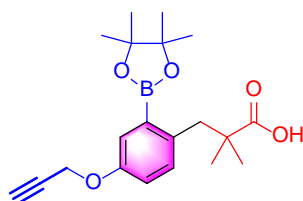

To a solution of 3-(2-bromo-4-hydroxyphenyl)-2,2-dimethylpropanoic acid **12** (700 mg, 2.56 mmol) in degassed 1,4-dioxane (25 mL) was added bis(pinacolato)diboron (1.3 mg, 5.12 mmol), Pd(dppf)Cl<sub>2</sub> (187.3 mg, 0.256 mmol, 0.1 eq), and potassium acetate (1.26 g, 12.8 mmol, 5 eq). The mixture was refluxed for 24 h under an atmosphere of nitrogen. The reaction mixture was allowed to cool to room temperature and AcOH (1.5 mL) was added. The resulting mixture was filtered through a celite bed using ethyl acetate as the eluent and concentrated under reduced pressure. The crude product was dissolved in DMF (15 mL) and crushed anhydrous K<sub>2</sub>CO<sub>3</sub> (1.06 g, 7.68 mmol, 3 eq) was added to form a suspension. Propargyl bromide (670 μL, 7.68 mmol, 3 eq) was added and the flask was heated to 60 °C for 3 hours. After cooling to room temperature, the reaction mixture was filtered through celite. The organic solvents were removed in vacuum. The obtained oily residue was redissolved with a cooled solution of NaOH (307 mg, 7.68 mmol, 3 eq.) in CH<sub>3</sub>OH:H<sub>2</sub>O (1:1 v/v, 8 mL), heated at 50 °C for 2 h. The reaction mixture was allowed to cool to room temperature. Then the pH was adjusted to 2-3 with 1N HCl. The phases were separated and the aqueous phase was extracted with EtOAc (3 × 30 mL). The combined organic phases were dried over anhydrous Na<sub>2</sub>SO<sub>4</sub>, filtered, and concentrated under reduced pressure. Further purification was achieved using column chromatography on silica gel (petroleum-ether / ethyl acetate / formic acid = 15:1:0.005) to give a colorless solid (1.16 g, 75 %). **Mp**: 86-88 °C. **<sup>1</sup>H NMR** (400 MHz, Chloroform-*d*) δ 7.37 (d, *J* = 2.9 Hz, 1H), 7.14 (d, *J* = 8.5 Hz, 1H), 6.96 (dd, *J* = 8.5, 3.0 Hz, 1H), 4.68 (d, *J* = 2.4 Hz, 2H), 3.27 (s, 2H), 2.50 (t, *J* = 2.4 Hz, 1H), 1.34 (s, 12H), 1.15 (s, 6H). **<sup>13</sup>C NMR** (101 MHz, CDCl<sub>3</sub>) δ 184.4, 155.5, 137.2, 131.5, 121.6, 117.2, 83.7, 78.8, 75.3, 55.9, 43.7, 42.4, 24.9, 24.5. **IR (KBr)**: ν (cm<sup>-1</sup>) 3260, 2976, 1694, 1568, 1417, 1330, 1281, 1199, 1139, 1057, 1029, 853. **HRMS (ESI)** *m/z*: Calculated for C<sub>20</sub>H<sub>26</sub>BO<sub>5</sub><sup>-</sup> [M-H]<sup>-</sup> 357.1879, found 357.1881.

## 6.2.4 Synthesis of 2,2-dimethyl-3-(2-nitro-4-(prop-2-yn-1-yloxy)phenyl)propanoic acid (hypoxia sensitive-15)

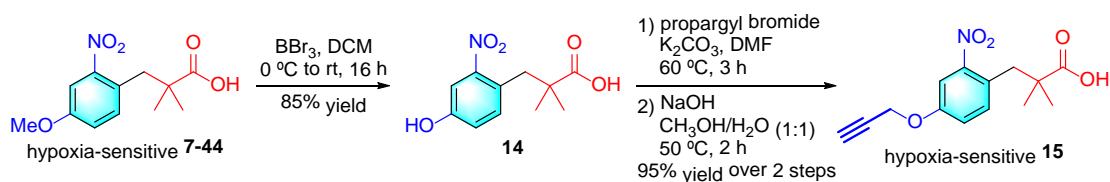

### 3-(4-hydroxy-2-nitrophenyl)-2,2-dimethylpropanoic acid (14)

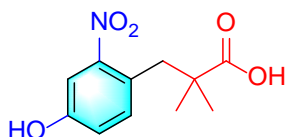

In an argon flushed 100 mL round bottom flask, 3-(4-methoxy-2-nitrophenyl)-2,2-dimethylpropanoic acid **7-44** (1.02 g, 4 mmol) was dissolved in CH<sub>2</sub>Cl<sub>2</sub> (25 mL) and the solution was cooled to 0 °C. A solution of BBr<sub>3</sub> in CH<sub>2</sub>Cl<sub>2</sub> (2 M, 4 mL, 8.0 mmol, 2 eq) was added dropwise at this temperature. The mixture was allowed to warm to room temperature and stirring was continued for 16 hours. The reaction was quenched through the addition of ice. The phases were separated and the aqueous phase was extracted with CH<sub>2</sub>Cl<sub>2</sub> (3 × 50 mL). The combined organic phases were dried over anhydrous Na<sub>2</sub>SO<sub>4</sub>, filtered, and concentrated under reduced pressure to give the crude product. Purification was achieved using column chromatography on silica gel (petroleum-ether / ethyl acetate / formic acid = 20:1:0.005) to give a red solid (813.4 mg, 85 %). **Mp**: 128-130 °C. **<sup>1</sup>H NMR** (400 MHz, Acetone-*d*<sub>6</sub>) δ 7.33 - 7.28 (m, 2H), 7.08 (dd, *J* = 8.5, 2.7 Hz, 1H), 3.22 (s, 2H), 1.12 (s, 6H). **<sup>13</sup>C NMR** (101 MHz, Acetone-*d*<sub>6</sub>) δ 178.0, 156.5, 151.6, 134.2, 122.4, 119.5, 110.8, 43.3, 39.3, 24.2. **IR (KBr)**:  $\nu$  (cm<sup>-1</sup>) 3416, 2977, 1696, 1621, 1517, 1370, 1193, 1156, 1013, 816. **HRMS** (ESI) *m/z*: Calculated for C<sub>11</sub>H<sub>12</sub>NO<sub>5</sub><sup>-</sup> [M-H]<sup>-</sup> 238.0721, found 238.0720.

**2,2-dimethyl-3-(2-nitro-4-(prop-2-yn-1-yloxy)phenyl)propanoic acid (hypoxia sensitive-15)**

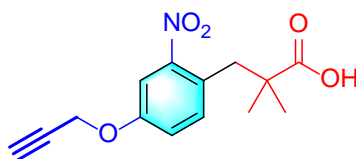

3-(4-hydroxy-2-nitrophenyl)-2,2-dimethylpropanoic acid **14** (1.0 g, 3.95 mmol) was dissolved in DMF (20 ml) and crushed anhydrous  $K_2CO_3$  (1.64 g, 11.9 mmol, 3 eq) was added to form a suspension. Propargyl bromide (1.03 mL, 11.9 mmol, 3 eq) was added and the flask was heated to 60°C for 3 hours. After cooling to room temperature, the reaction mixture was filtered through celite. The organic solvents were removed in vacuum. The obtained oily residue was redissolved with a cooled solution of NaOH (475 mg, 11.9 mmol, 3 eq.) in  $CH_3OH:H_2O$  (1:1v/v, 8 mL), heated at 50 °C for 2 h. The reaction mixture was allowed to cool to room temperature. Then the pH was adjusted to 2-3 with 1N HCl. The phases were separated and the aqueous phase was extracted with EtOAc (3 × 20 mL). The combined organic phases were dried over anhydrous  $Na_2SO_4$ , filtered, and concentrated under reduced pressure. Further purification was achieved using column chromatography on silica gel (petroleum-ether / ethyl acetate / formic acid = 15:1:0.005) to give a yellow solid (1.04 g, 95 %). **Mp:** 100-102 °C.  **$^1H$  NMR** (400 MHz, Chloroform-*d*)  $\delta$  7.45 (d,  $J = 2.7$  Hz, 1H), 7.29 (d,  $J = 8.6$  Hz, 1H), 7.14 (dd,  $J = 8.6, 2.8$  Hz, 1H), 4.74 (d,  $J = 2.4$  Hz, 2H), 3.29 (s, 2H), 2.58 (t,  $J = 2.4$  Hz, 1H), 1.18 (s, 6H).  **$^{13}C$  NMR** (101 MHz,  $CDCl_3$ )  $\delta$  183.8, 156.4, 151.0, 134.0, 124.8, 119.5, 110.8, 77.4, 76.7, 56.3, 43.9, 39.8, 24.7. **IR (KBr):**  $\nu$  ( $cm^{-1}$ ) 3293, 2978, 1681, 1526, 1495, 1330, 1268, 1211, 1152, 1028, 863. **HRMS** (ESI)  $m/z$ : Calculated for  $C_{14}H_{14}NO_5^-$  [M-H]<sup>-</sup> 276.0877, found 276.0879.





## 8. References

- [1] Q. Bai, Z. Bai, H. Wang, *Org. Lett.* **2019**, *21*, 8225-8228.
- [2] Y. Y. Che, Y. Yue, L. Z. Lin, B. Pei, X. Deng, C. Feng, *Angew. Chem. Int. Ed.* **2020**, *59*, 16414-16419.
- [3] F. Ghiringhelli, A. Uttry, K. K. Ghosh, M. van Gemmeren, *Angew. Chem. Int. Ed.* **2020**, *59*, 23127-23131.
- [4] K. K. Ghosh, A. Uttry, A. Koldemir, M. Ong, M. van Gemmeren, *Org. Lett.* **2019**, *21*, 7154-7157.
- [5] R. Zhao, W. Lu, *Organometallics* **2018**, *37*, 2188-2192.
- [6] K. Kiyokawa, T. Watanabe, L. Fra, T. Kojima, S. Minakata, *J. Org. Chem.* **2017**, *82*, 11711-11720.
- [7] R. A. Hankins, S. I. Suarez, M. A. Kalk, N. M. Green, M. N. Harty, J. C. Lukesh, *Angew. Chem. Int. Ed.* **2020**, *59*, 22238-22245.
- [8] B. Liu, L. Hu, *Bioorg. Med. Chem.* **2003**, *11*, 3889-3899.
- [9] Y. Liao, Y. Zhou, Z. Zhang, J. Fan, F. Liu, Z. Shi, *Org. Lett.* **2021**, *23*, 1251-1257.
- [10] M. G. Nicolaou, C. S. Yuan, R. T. Borchardt, *J. Org. Chem.* **1996**, *61*, 8636-8641.

## 9. NMR Spectra

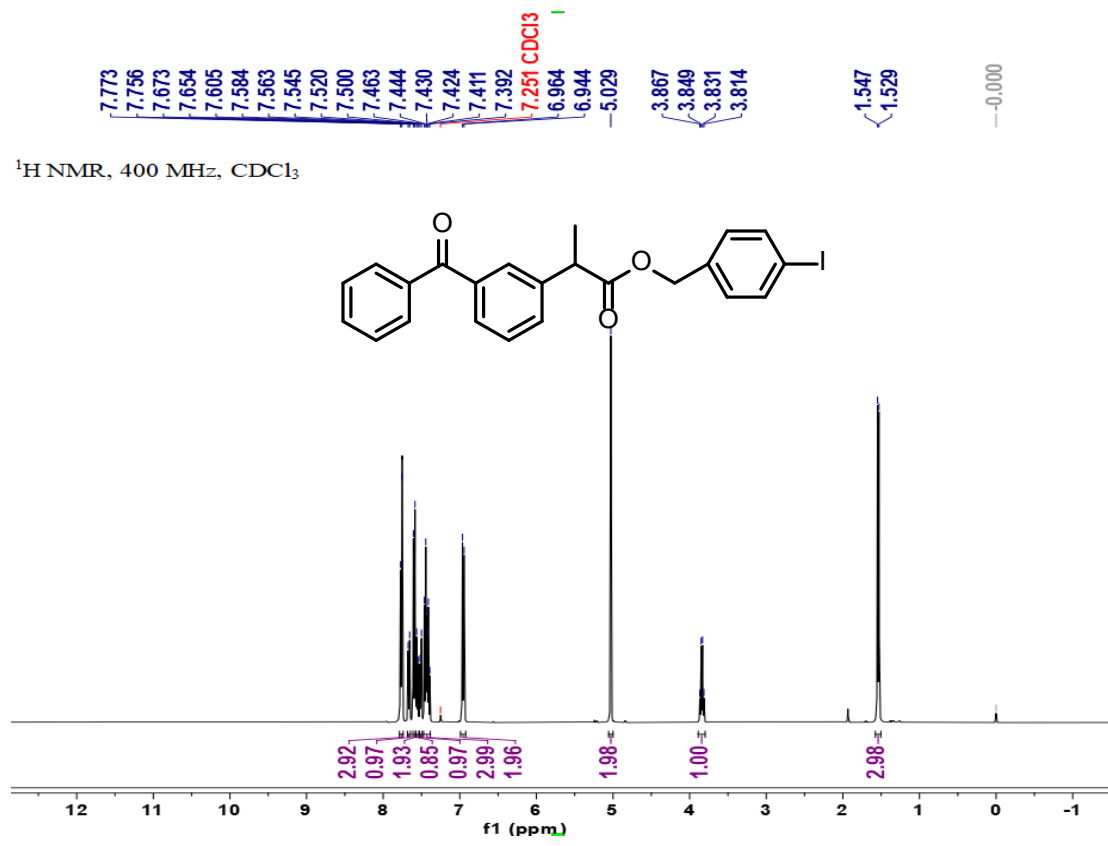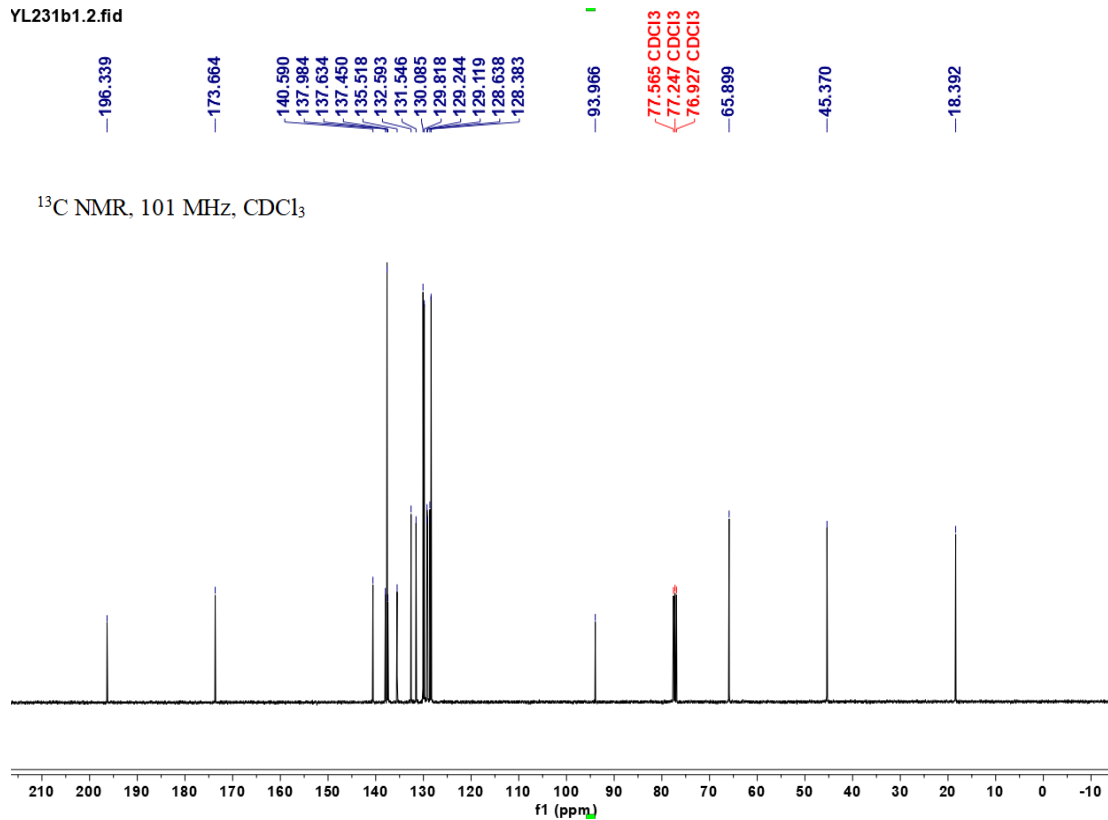

<sup>1</sup>H NMR (400 MHz) and <sup>13</sup>C NMR (101 MHz) spectra of **6-58**

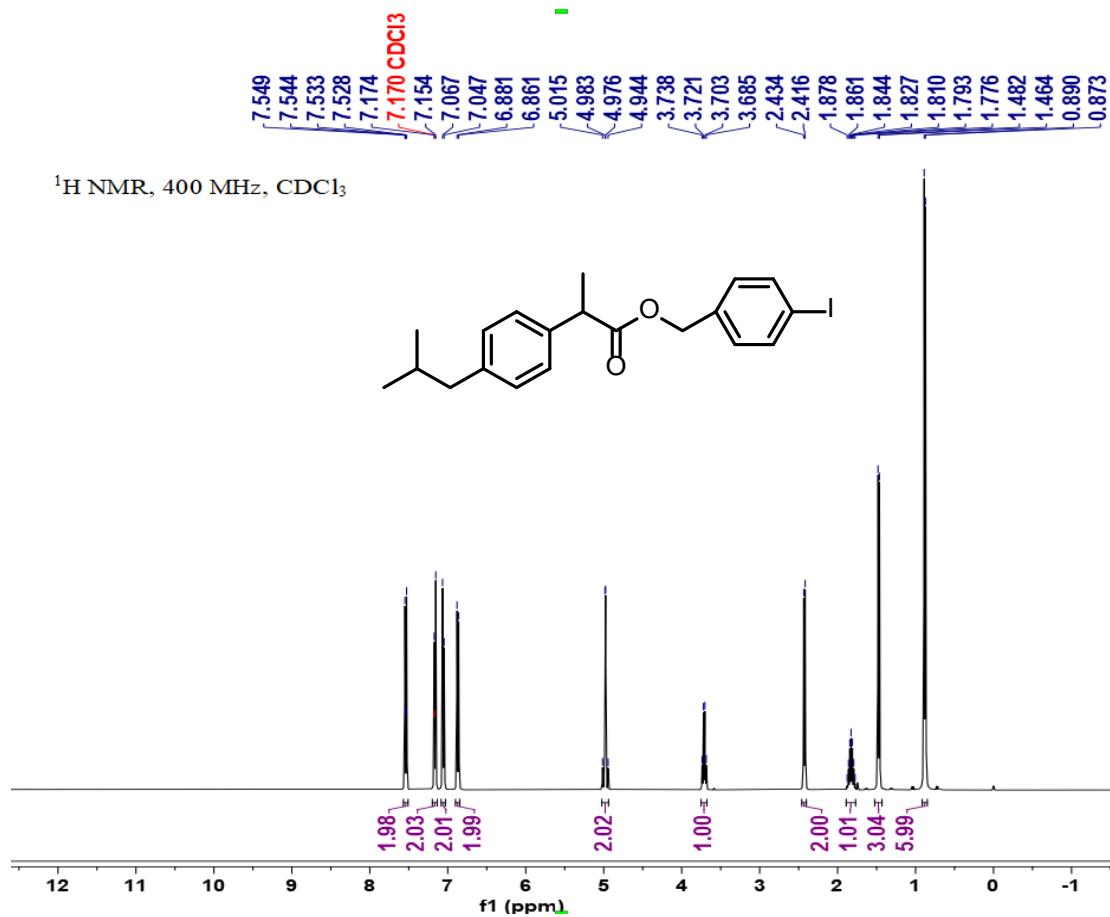

YL232b.2.fid

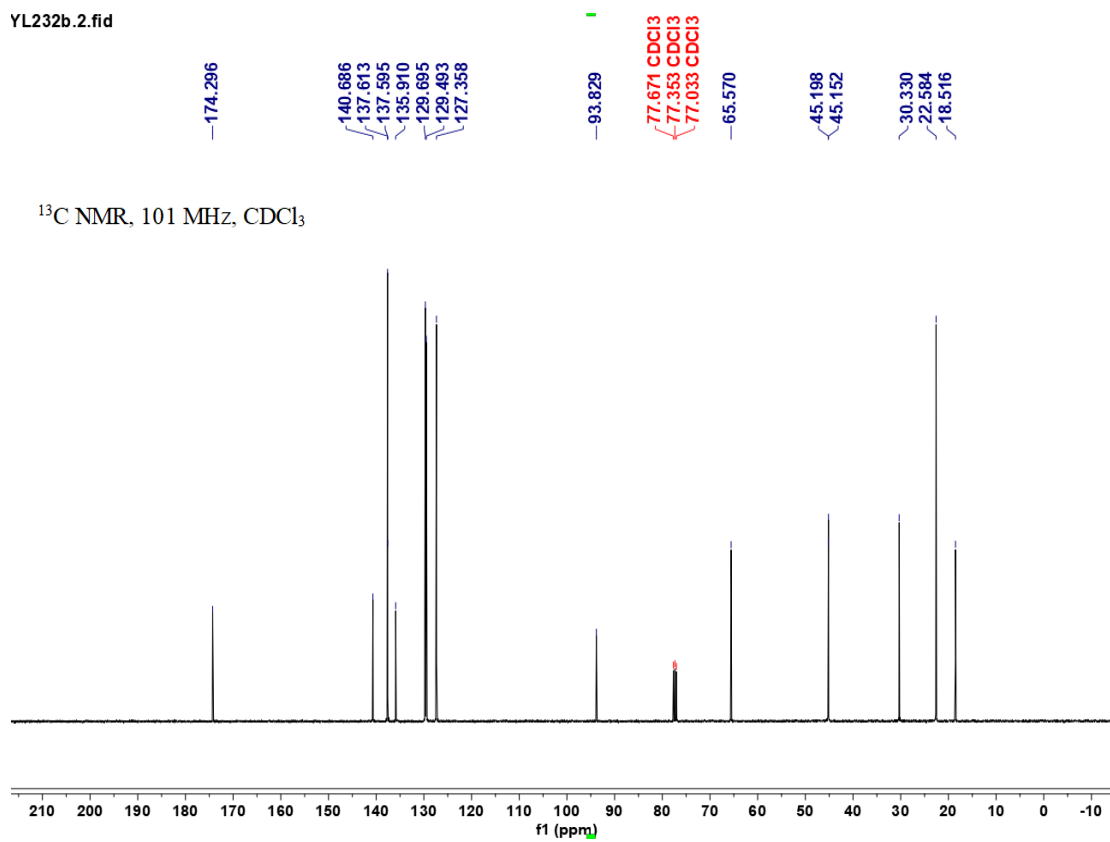

<sup>1</sup>H NMR (400 MHz) and <sup>13</sup>C NMR (101 MHz) spectra of **6-59**

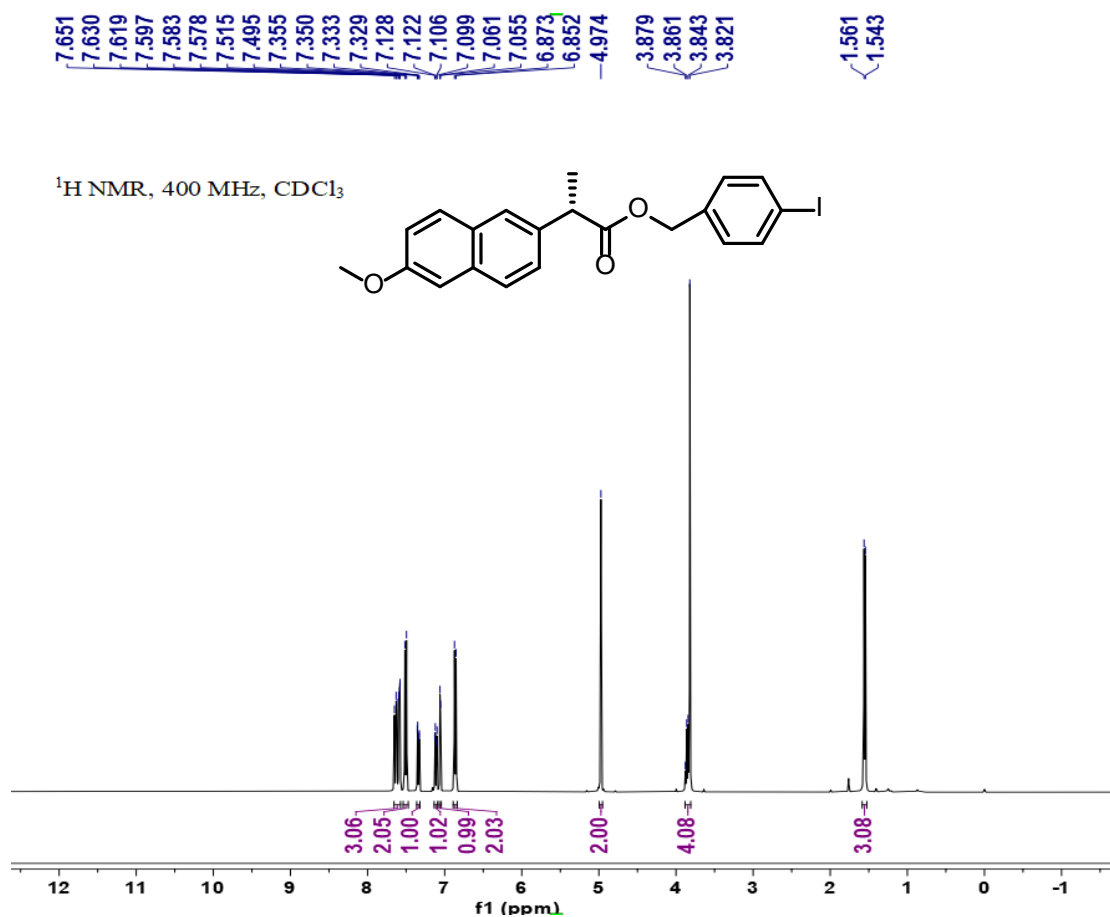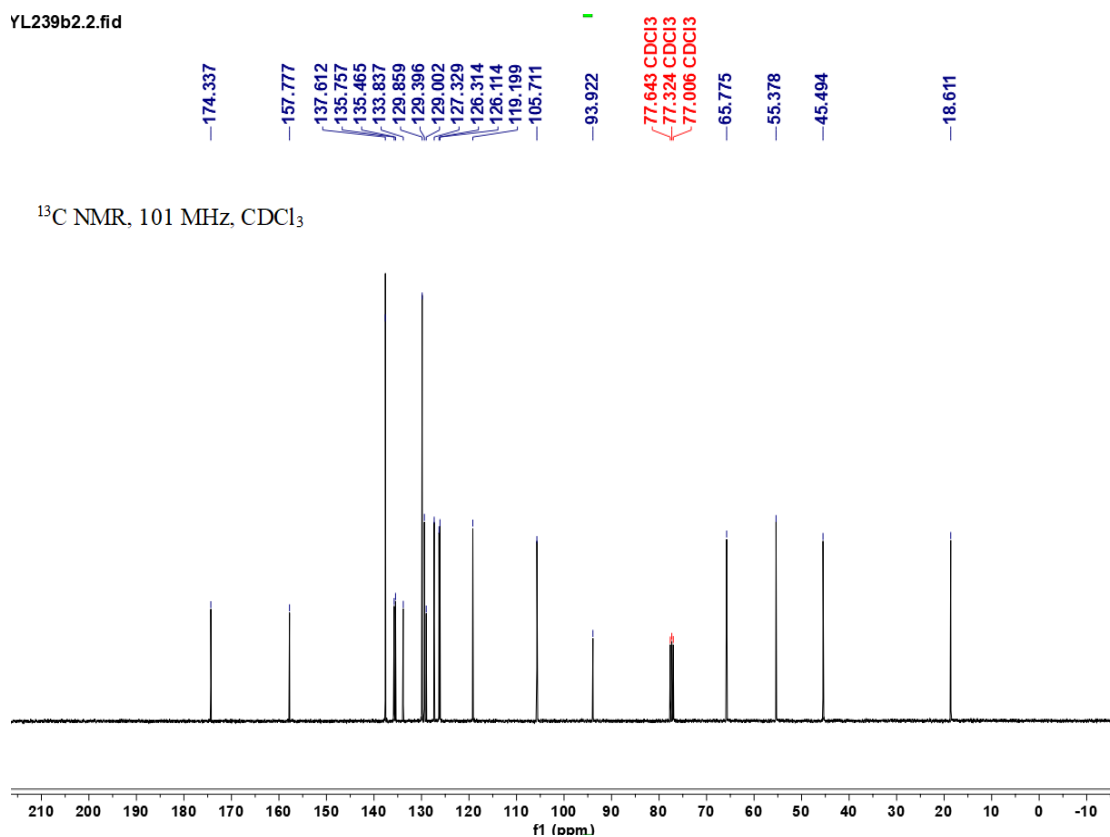

<sup>1</sup>H NMR (400 MHz) and <sup>13</sup>C NMR (101 MHz) spectra of **6-60**

HYL240b3.1.fid

7.895  
7.890  
7.874  
7.863  
7.847  
7.842  
7.338  
7.317  
6.981  
6.975  
6.960  
6.954  
6.932  
6.926  
2.953  
2.944  
2.937  
2.926  
2.915  
2.546  
2.524  
2.499  
2.478  
2.405  
2.397  
2.310  
2.174  
2.151  
2.127  
2.105  
2.064  
2.050  
2.043  
2.037  
2.027  
2.008  
2.001  
1.991  
1.967  
1.960  
1.736  
1.643  
1.635  
1.617  
1.610  
1.605  
1.589  
1.584  
1.554  
1.546  
1.541  
1.522  
1.513  
1.497  
1.489  
1.464  
1.456  
0.919

$^1\text{H}$  NMR, 400 MHz,  $\text{CDCl}_3$

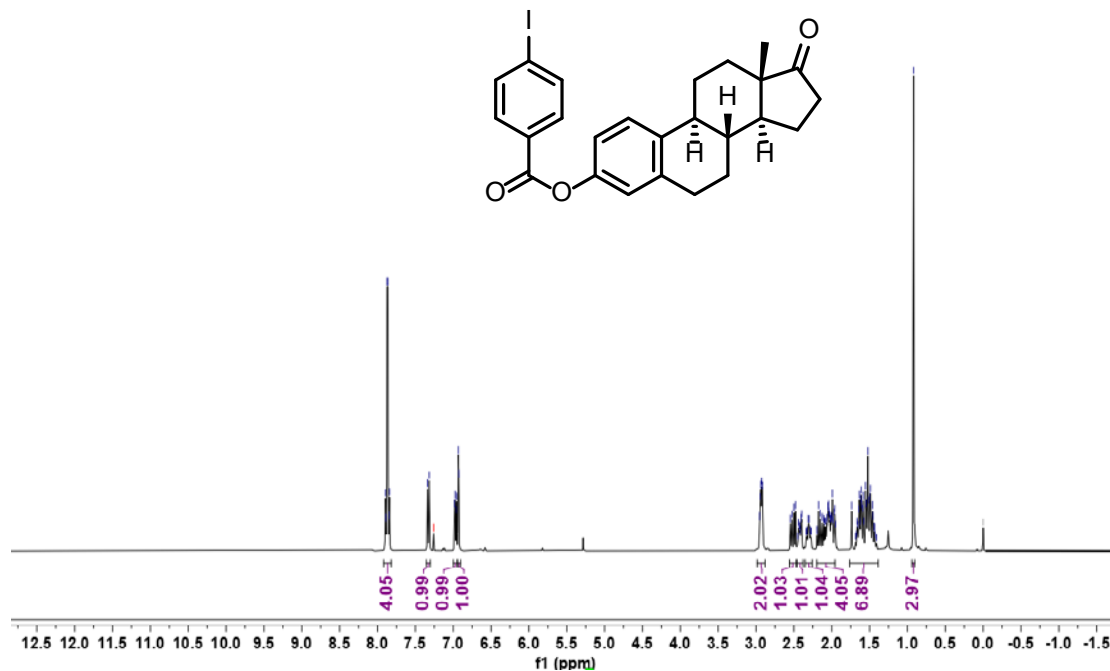

HYL240b3.3.fid

220.801  
165.002  
148.651  
138.175  
137.952  
137.647  
131.533  
129.139  
126.546  
121.613  
118.778  
101.571  
77.433  $\text{CDCl}_3$   
77.116  $\text{CDCl}_3$   
76.797  $\text{CDCl}_3$   
50.441  
47.970  
44.182  
38.011  
35.890  
31.577  
29.453  
26.366  
25.797  
21.624  
13.876

$^{13}\text{C}$  NMR, 101 MHz,  $\text{CDCl}_3$

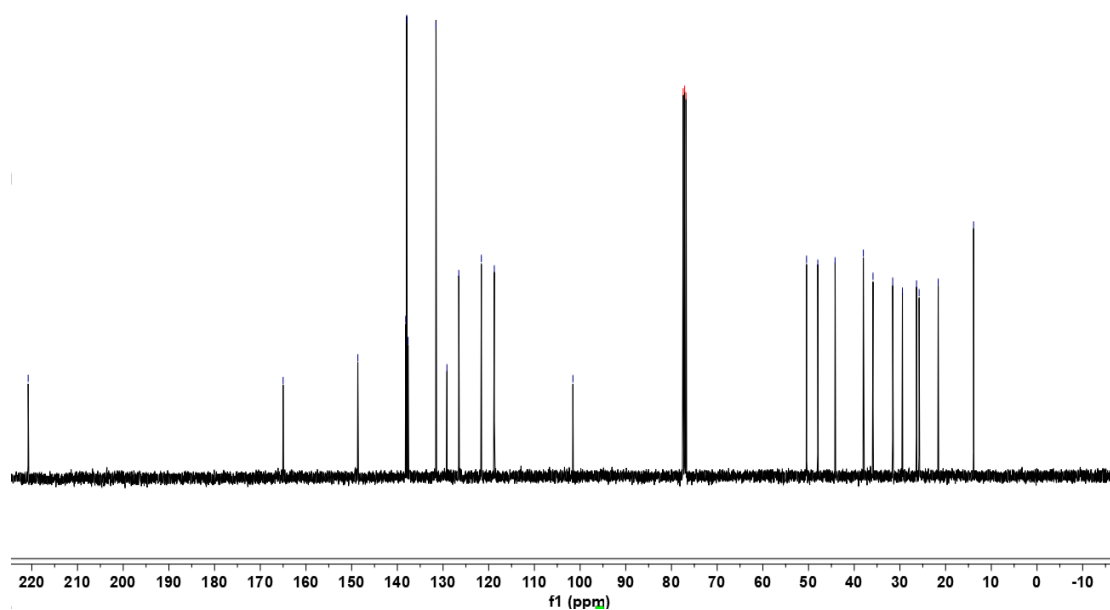

$^1\text{H}$  NMR (400 MHz) and  $^{13}\text{C}$  NMR (101 MHz) spectra of 6-61

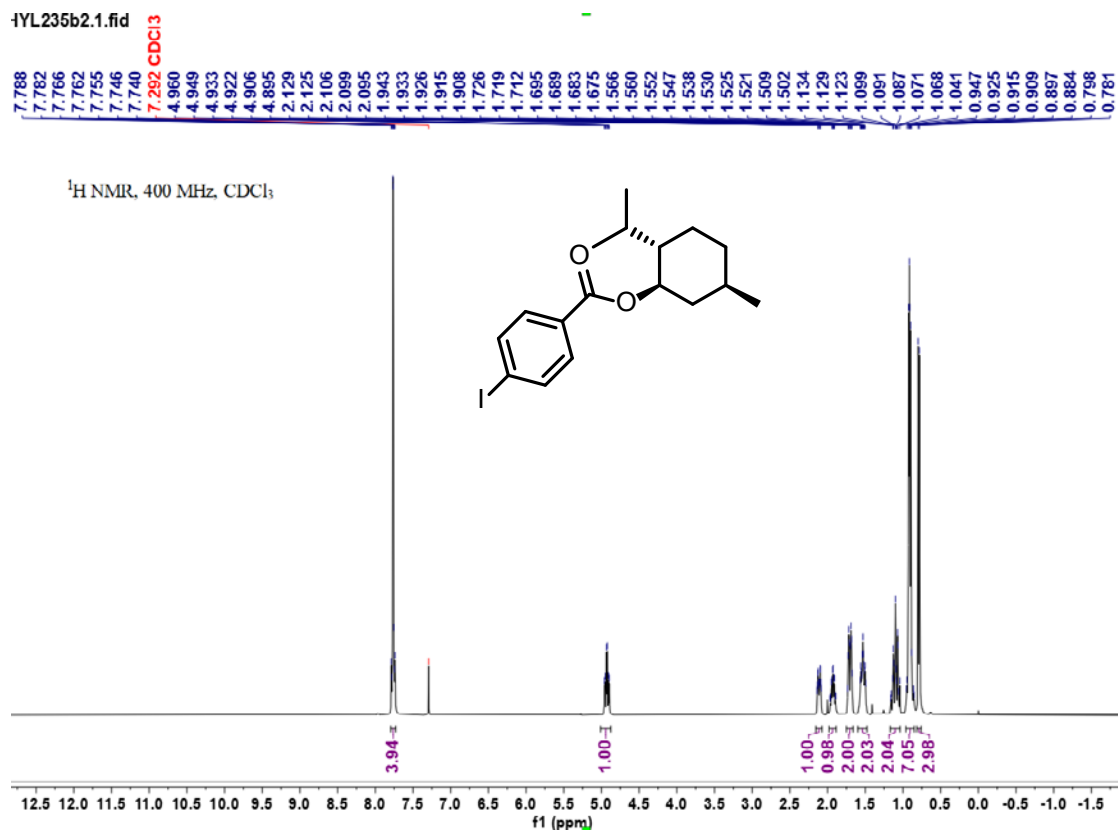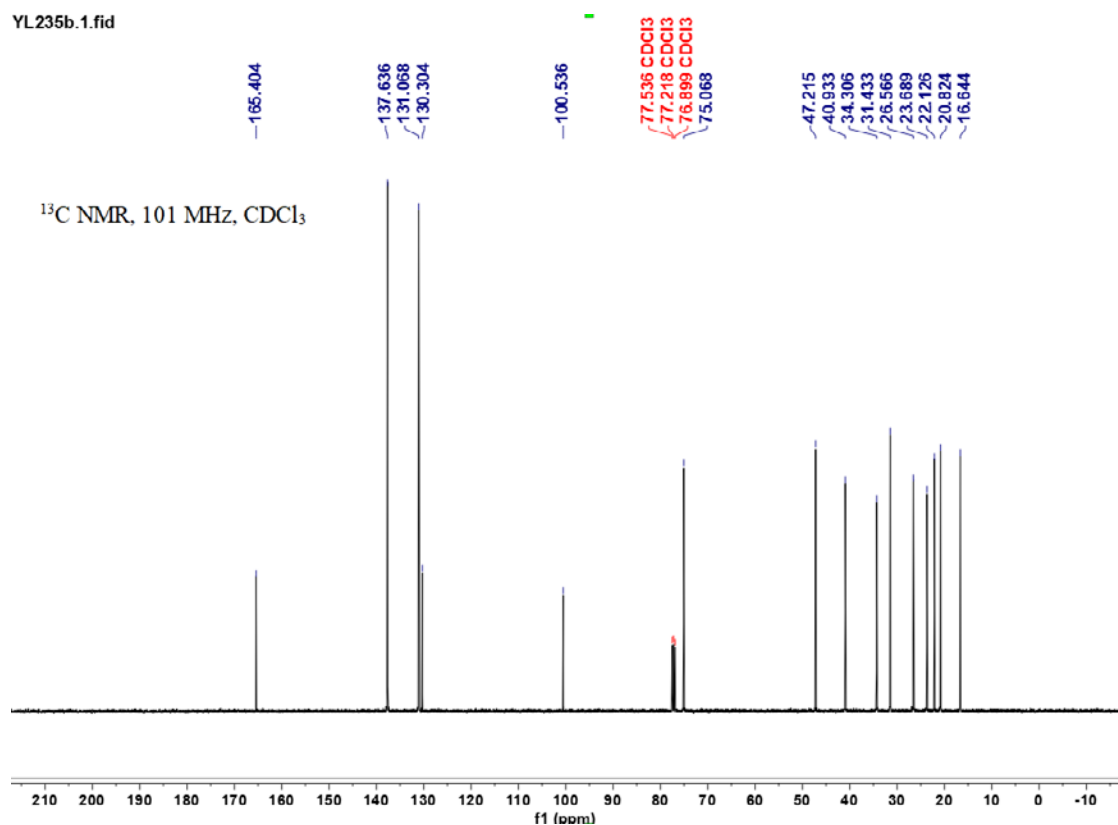

<sup>1</sup>H NMR (400 MHz) and <sup>13</sup>C NMR (101 MHz) spectra of **6-62**

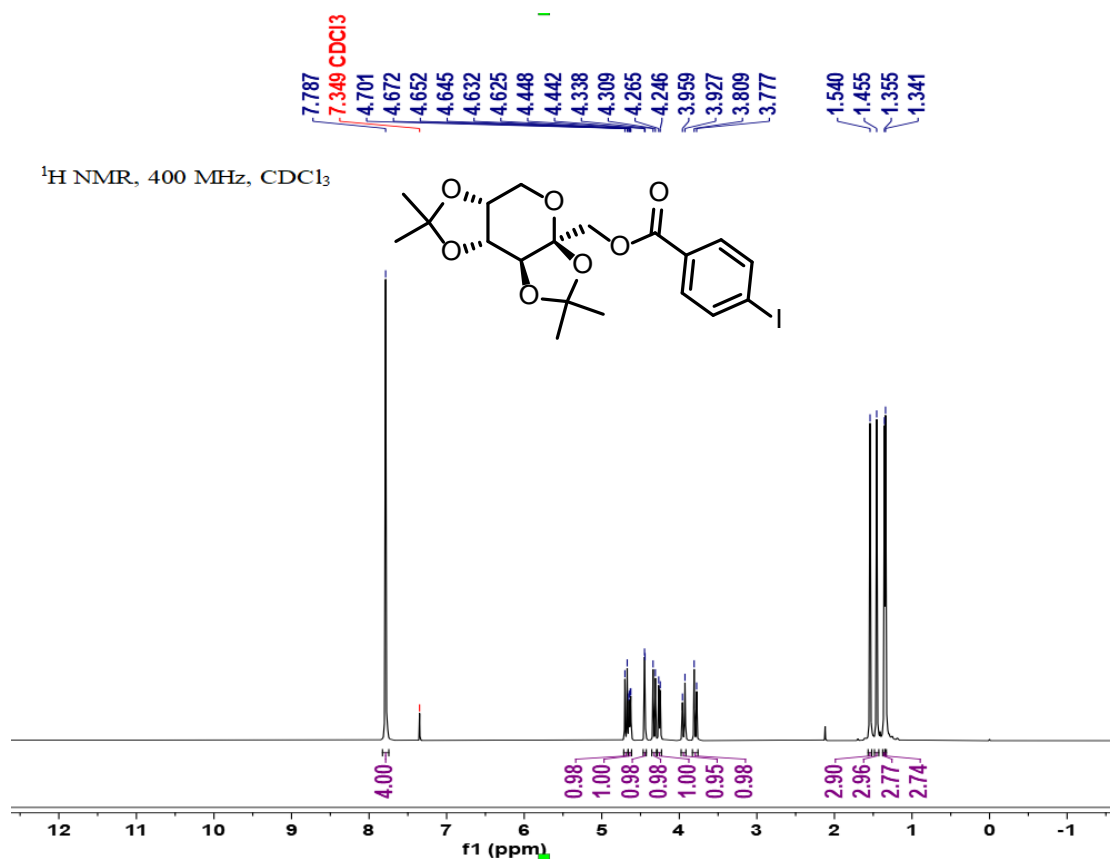

1YL246b1.1.fid

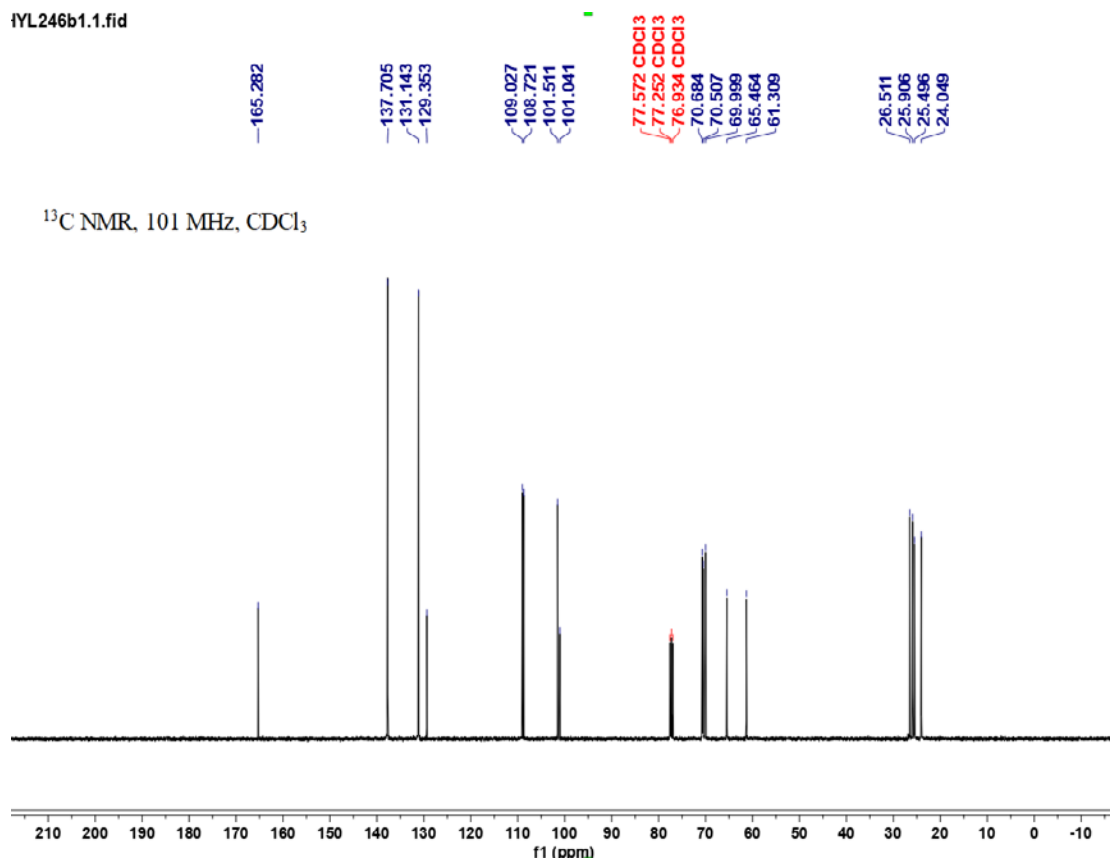

<sup>1</sup>H NMR (400 MHz) and <sup>13</sup>C NMR (101 MHz) spectra of **6-63**

YL241b1-1.1.fid

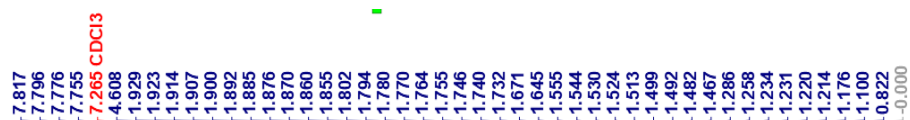

<sup>1</sup>H NMR, 400 MHz, CDCl<sub>3</sub>

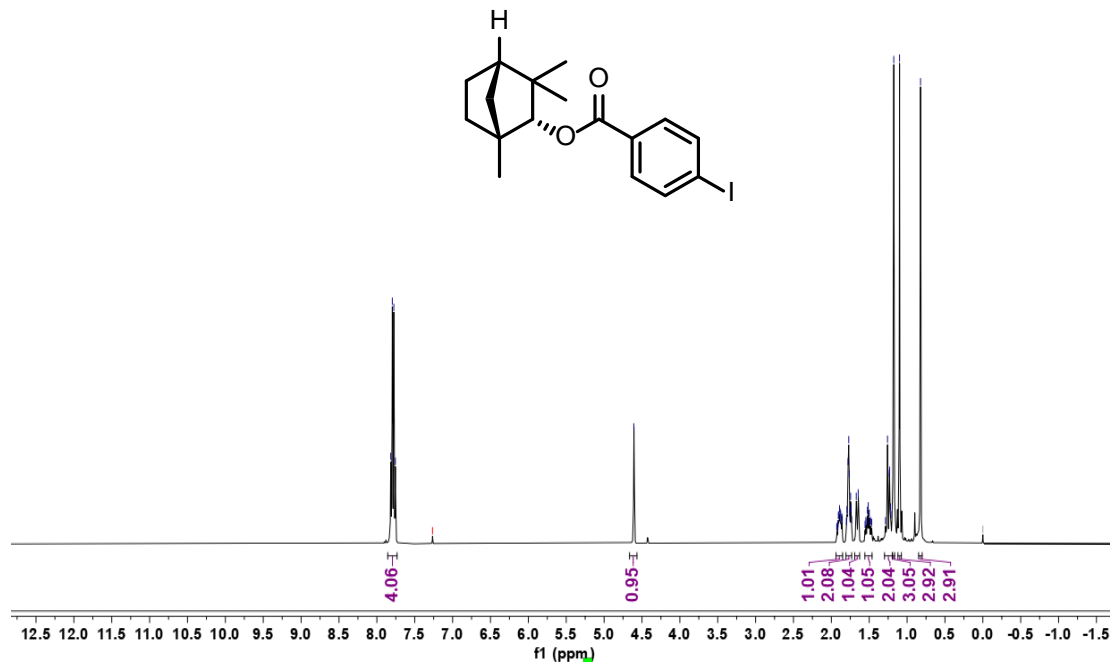

YL241b1-1.2.fid

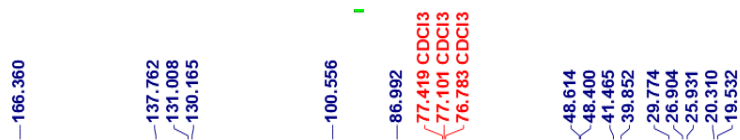

<sup>13</sup>C NMR, 101 MHz, CDCl<sub>3</sub>

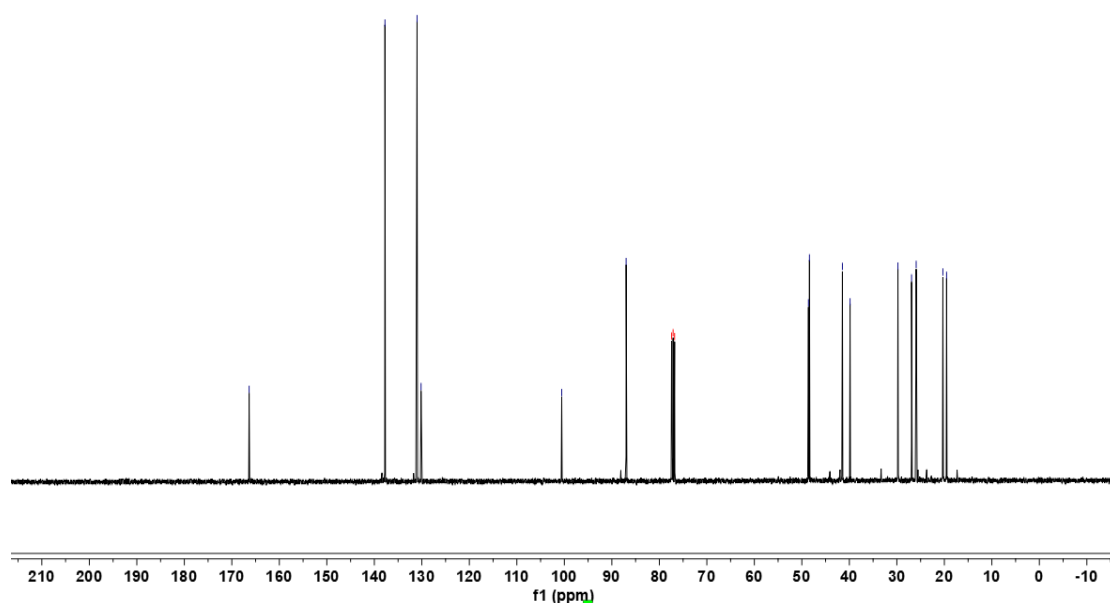

<sup>1</sup>H NMR (400 MHz) and <sup>13</sup>C NMR (101 MHz) spectra of **6-64**



YL242b2-1.1.fid

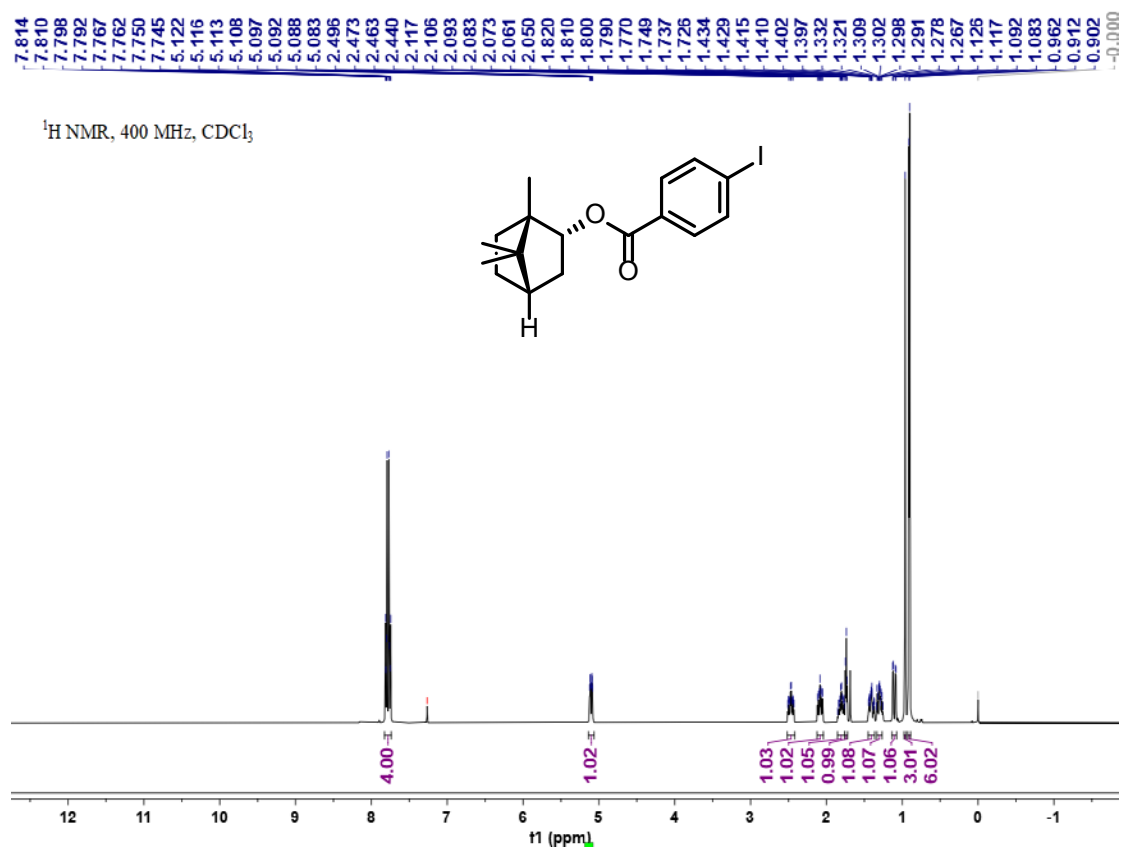

IYL242b2-1.2.fid

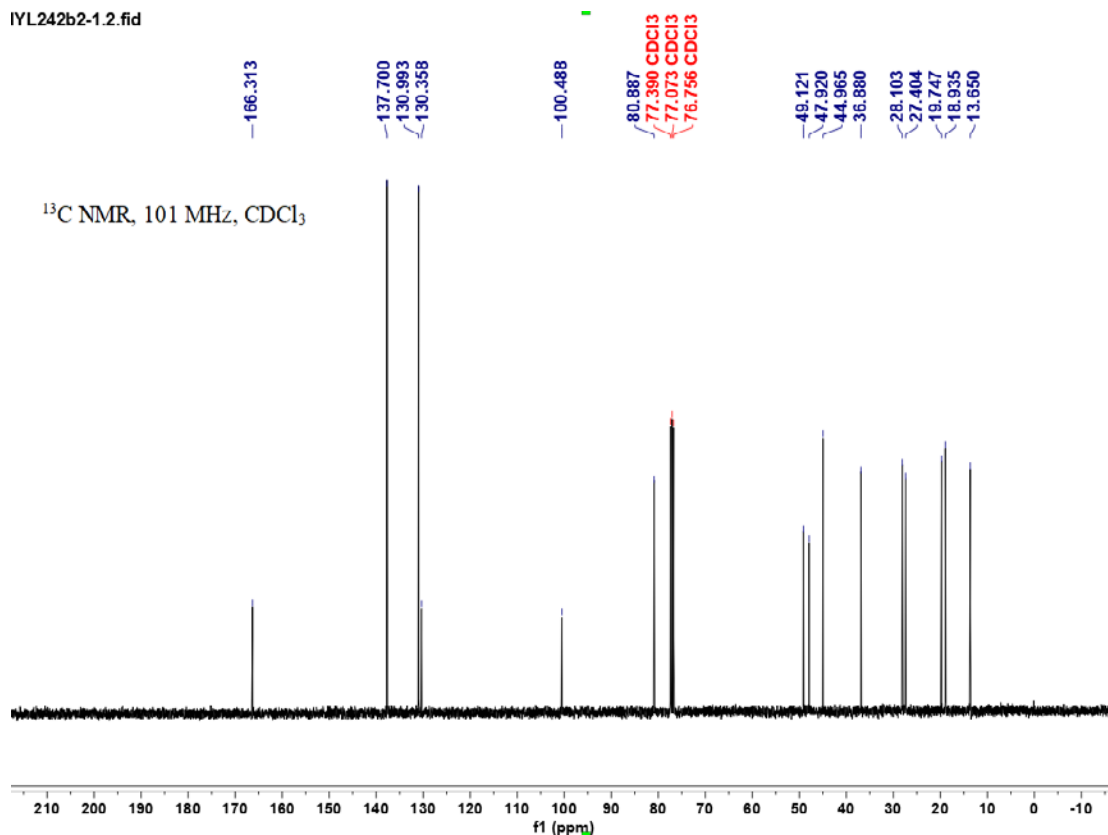

<sup>1</sup>H NMR (400 MHz) and <sup>13</sup>C NMR (101 MHz) spectra of **6-65**

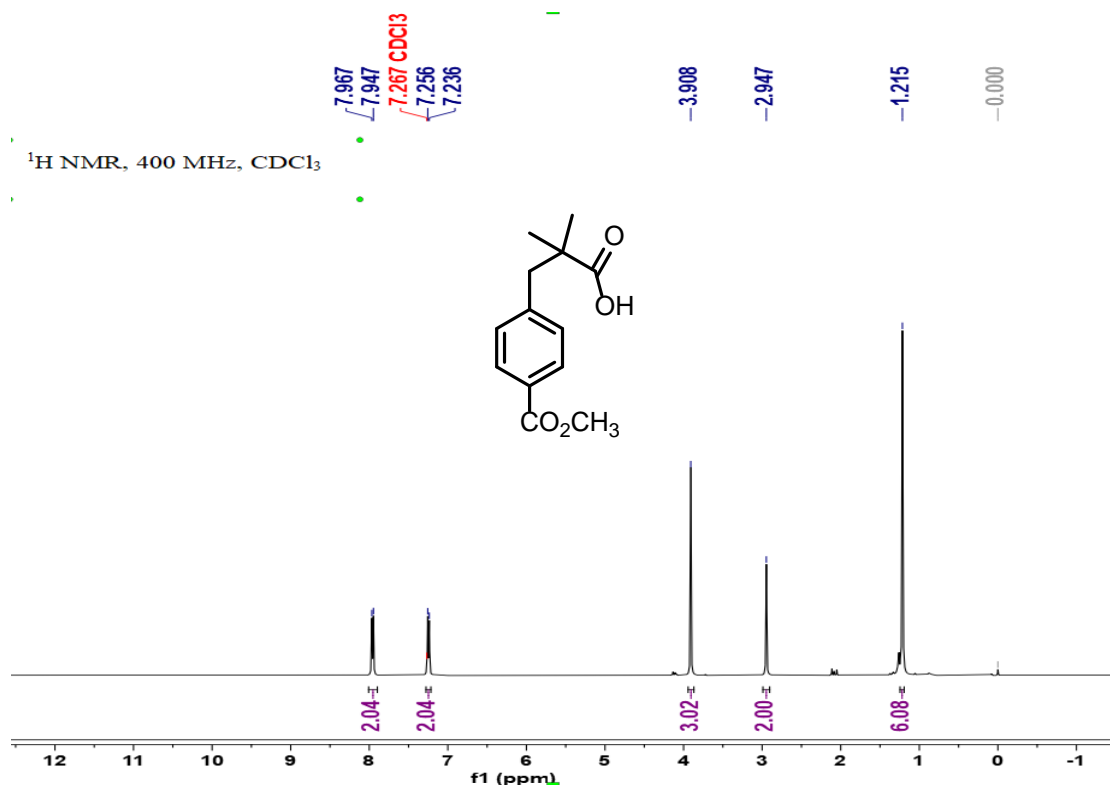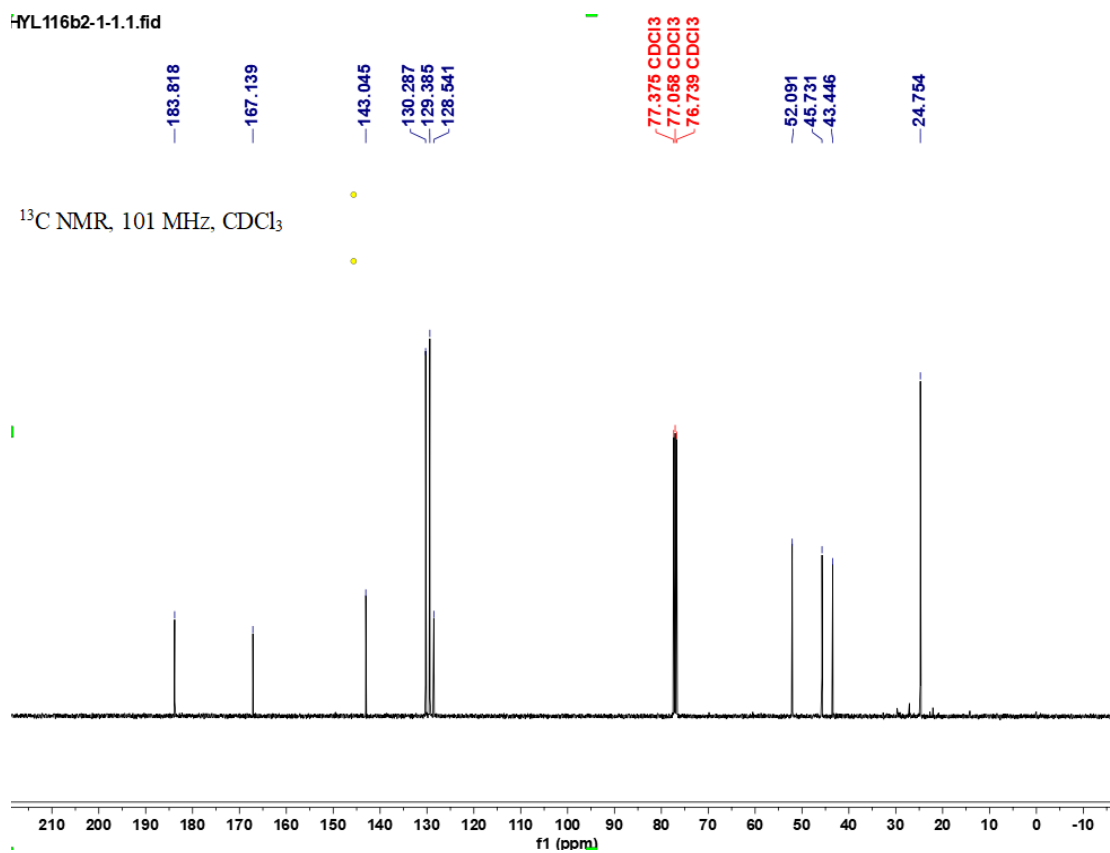

<sup>1</sup>H NMR (400 MHz) and <sup>13</sup>C NMR (101 MHz) spectra of 7-1

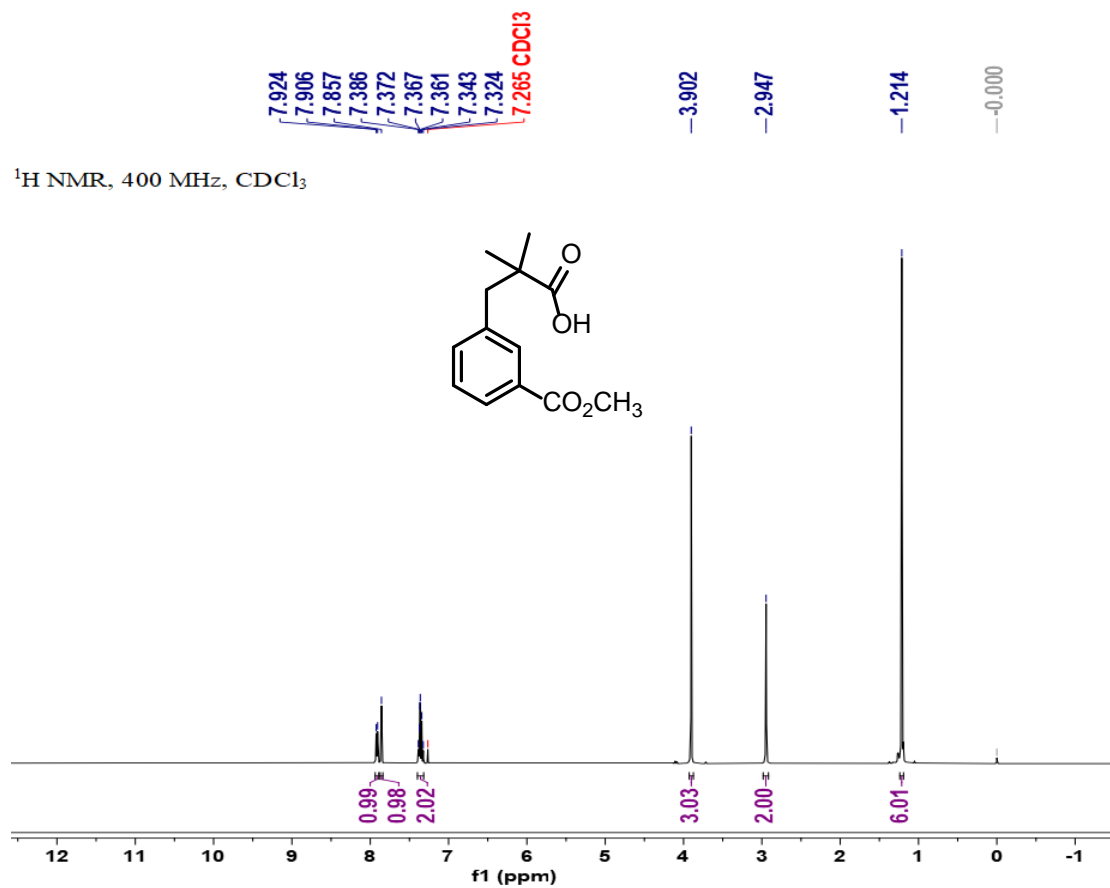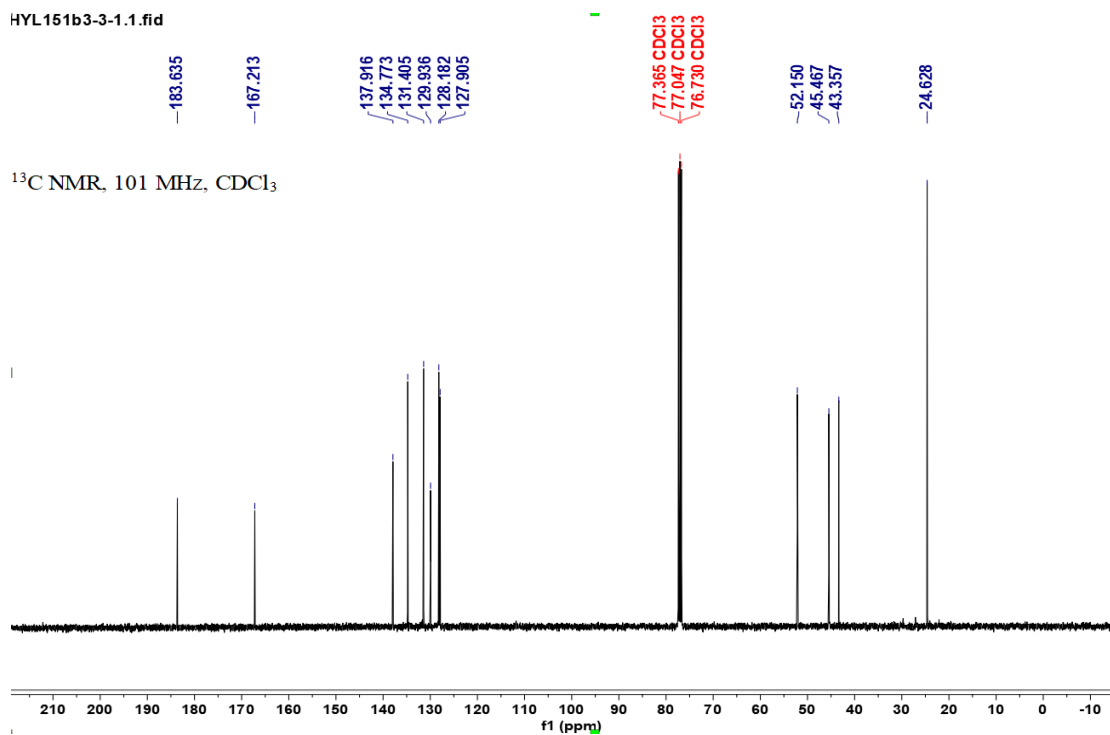

<sup>1</sup>H NMR (400 MHz) and <sup>13</sup>C NMR (101 MHz) spectra of 7-2

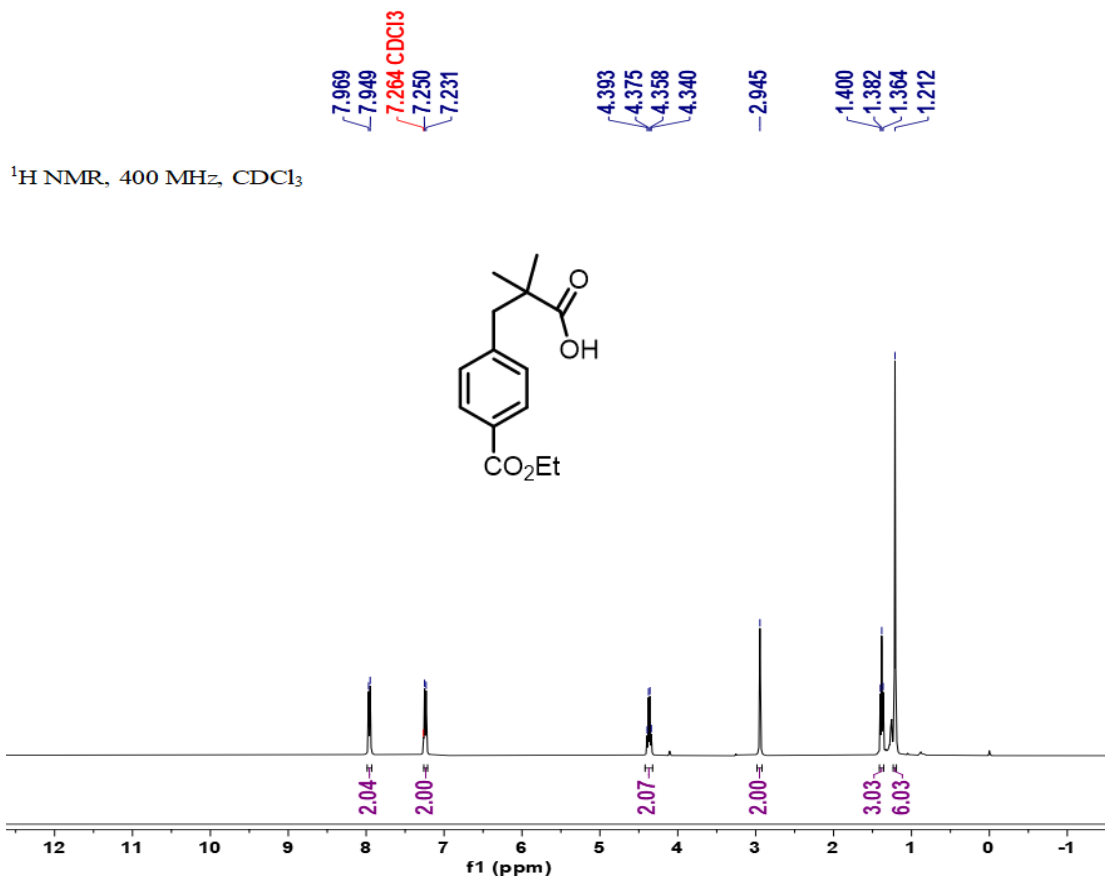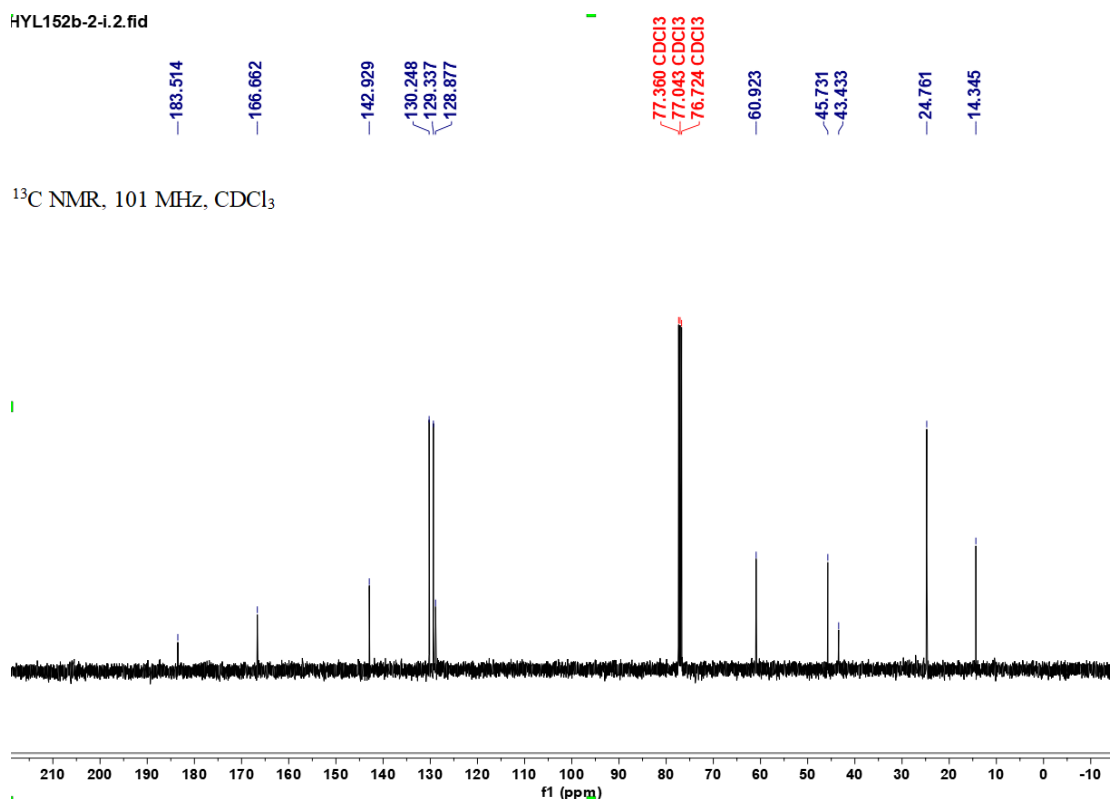

<sup>1</sup>H NMR (400 MHz) and <sup>13</sup>C NMR (101 MHz) spectra of 7-3

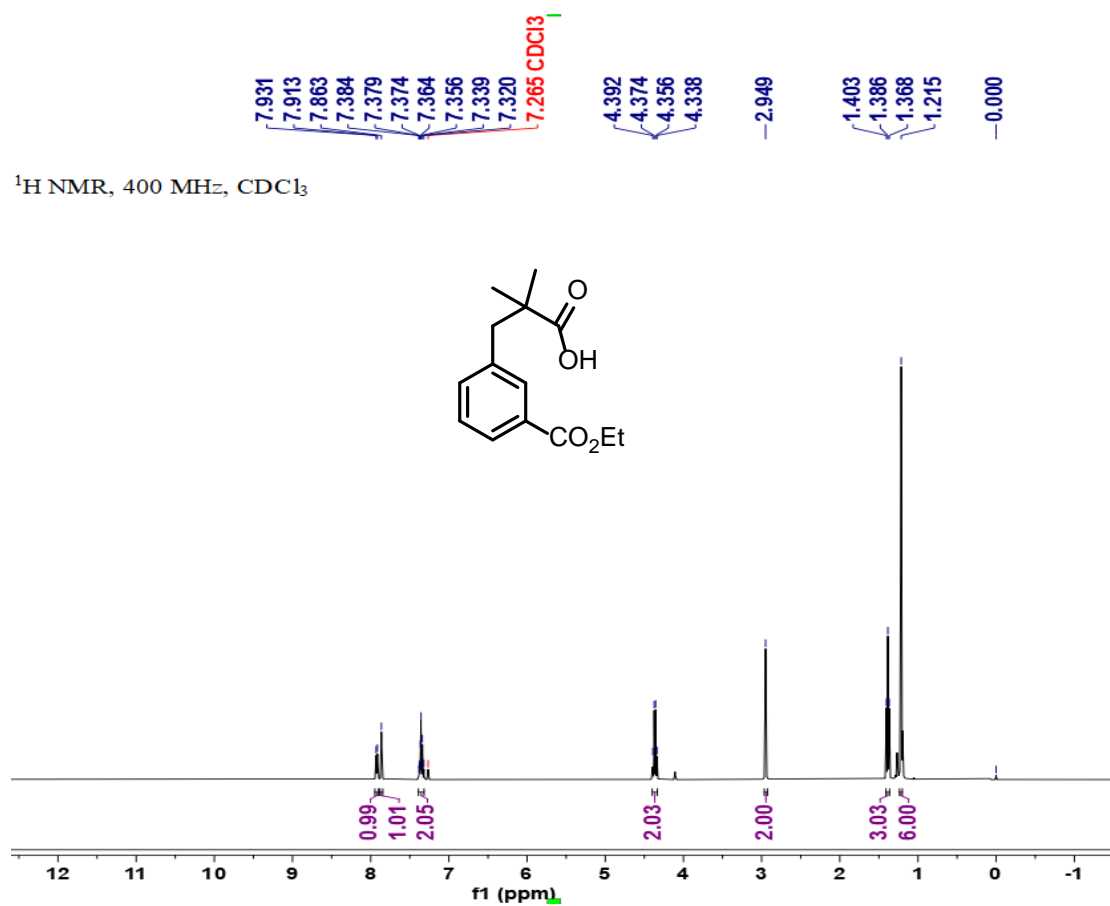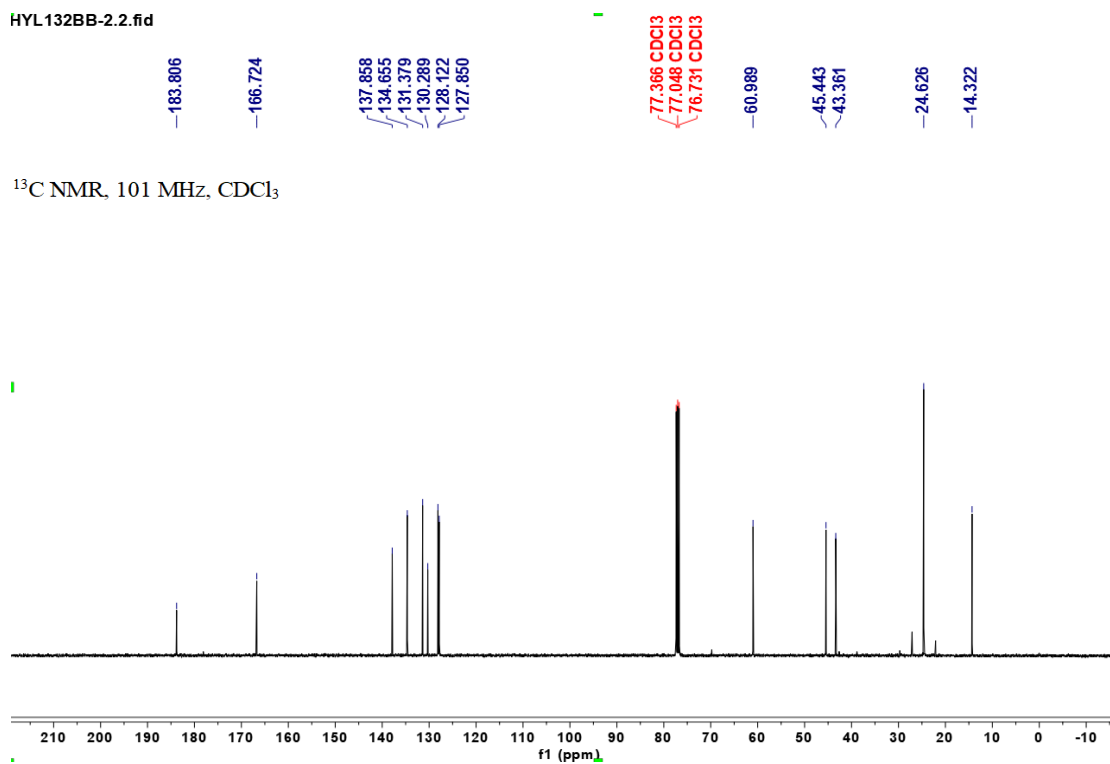

<sup>1</sup>H NMR (400 MHz) and <sup>13</sup>C NMR (101 MHz) spectra of **7-4**

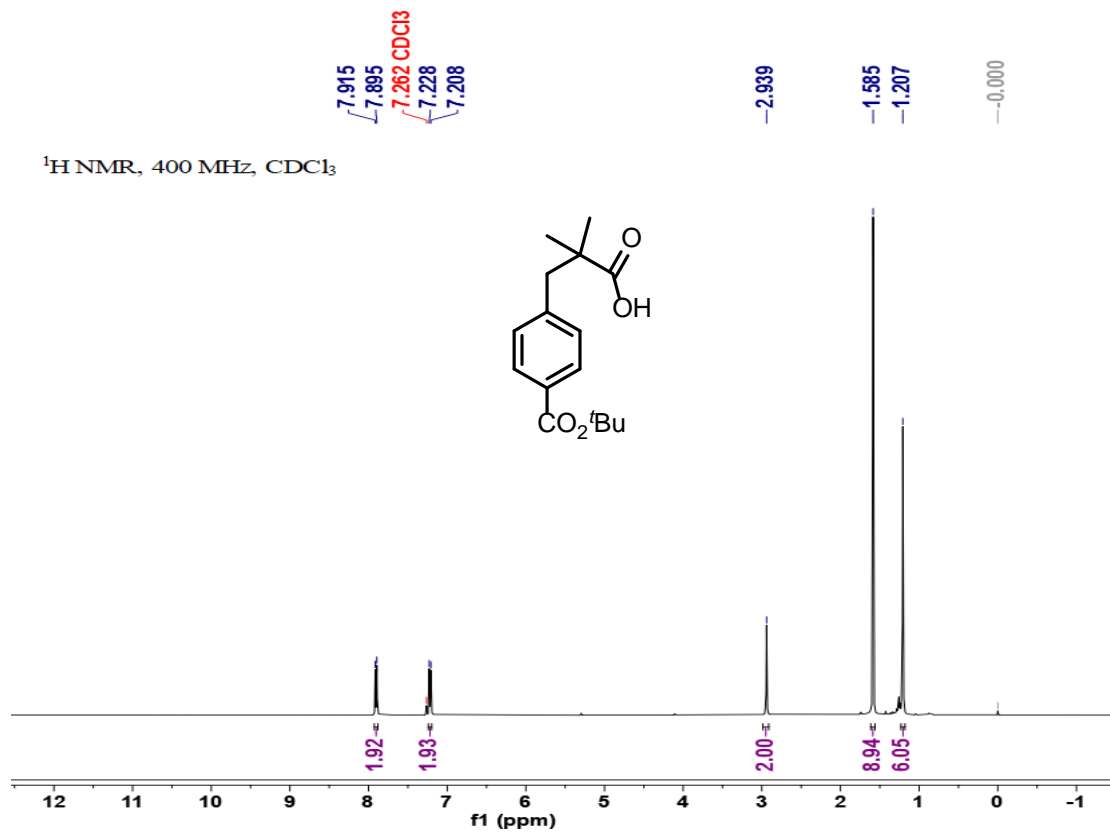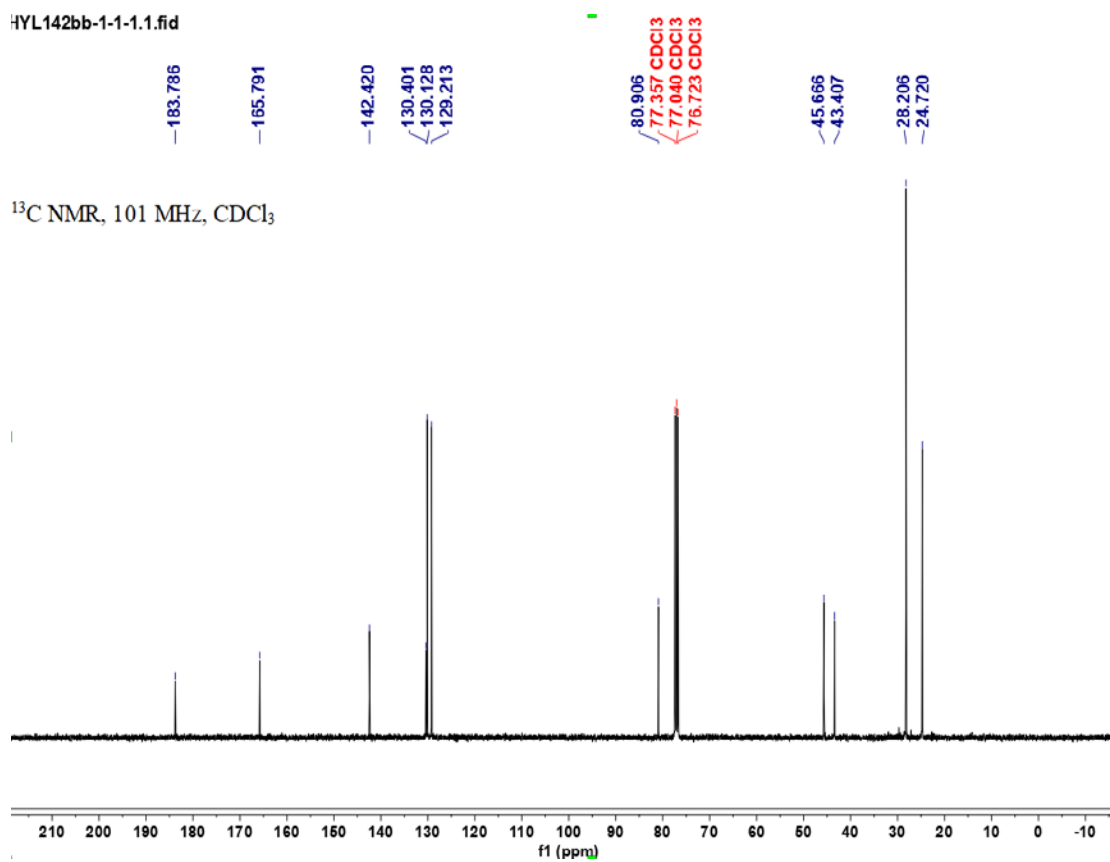

<sup>1</sup>H NMR (400 MHz) and <sup>13</sup>C NMR (101 MHz) spectra of **7-5**

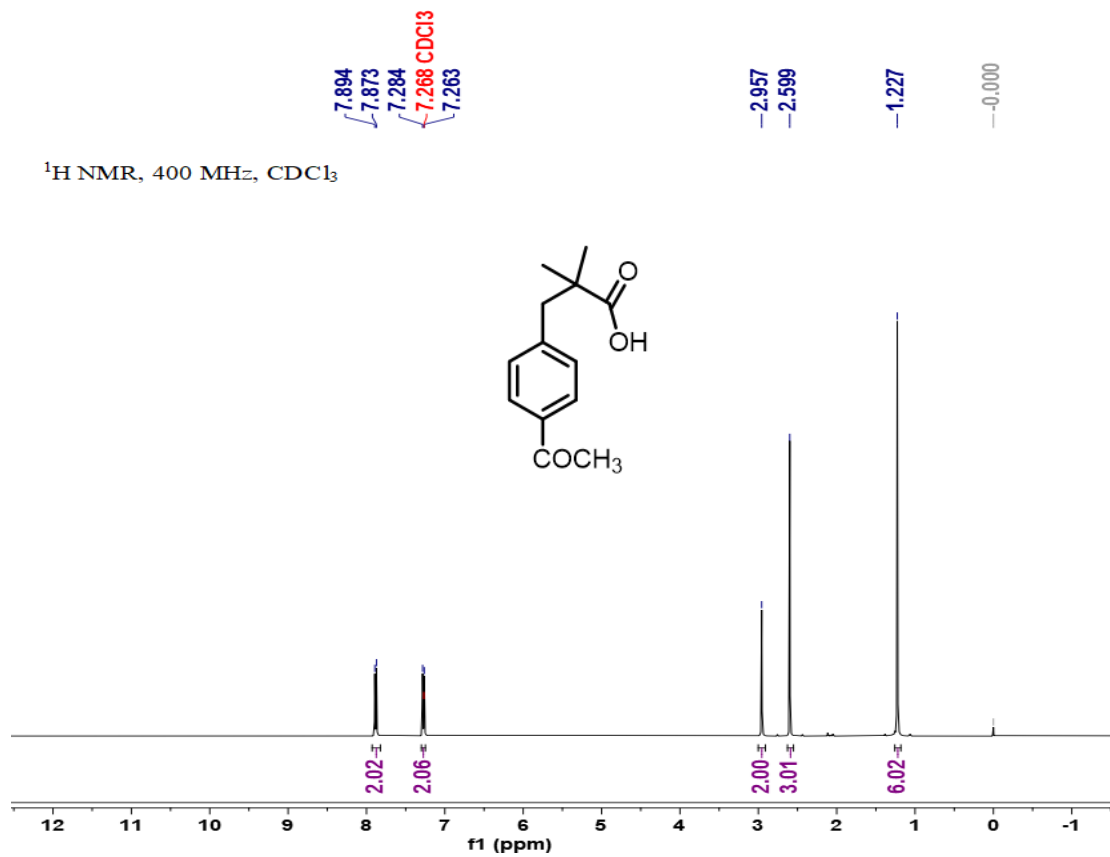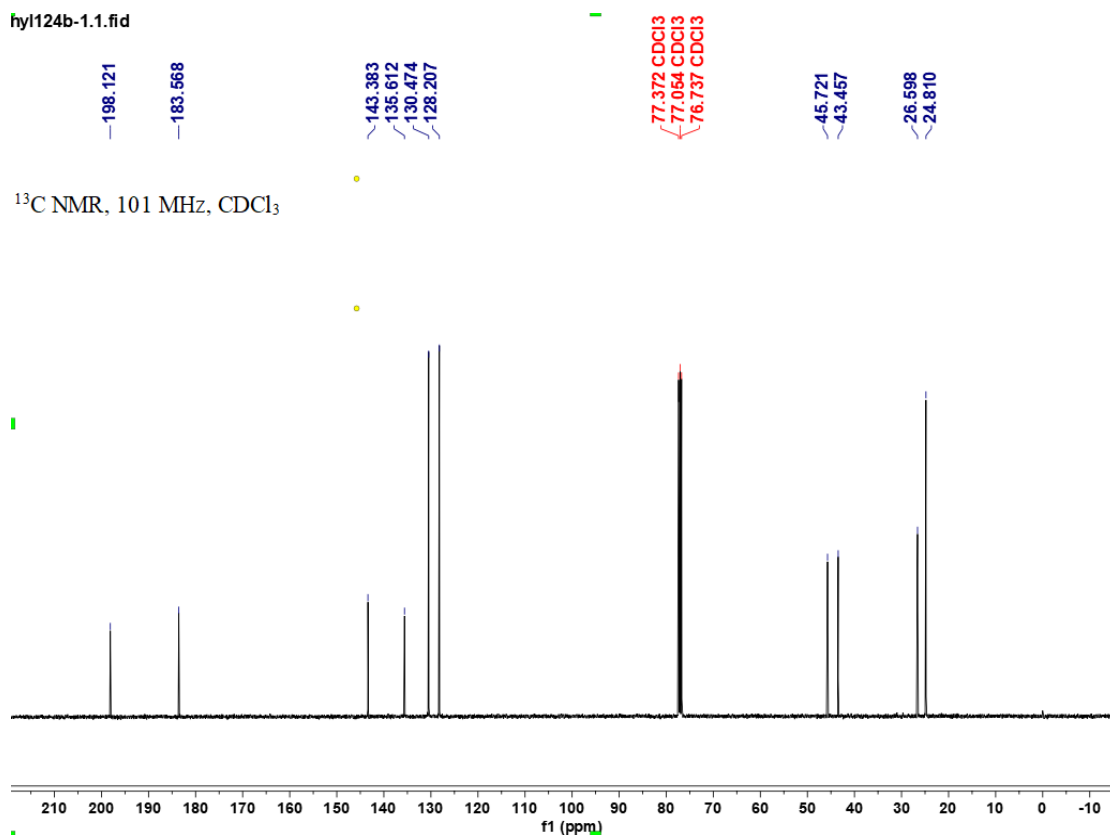

<sup>1</sup>H NMR (400 MHz) and <sup>13</sup>C NMR (101 MHz) spectra of 7-6

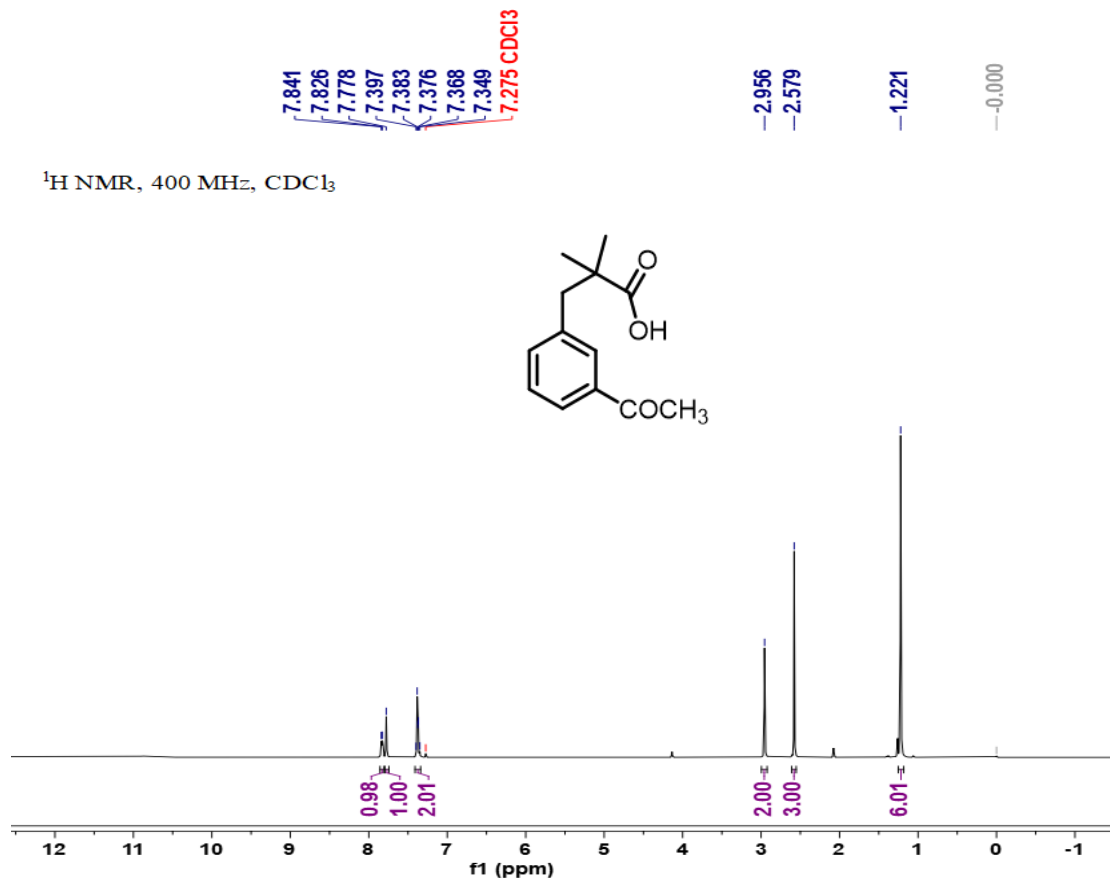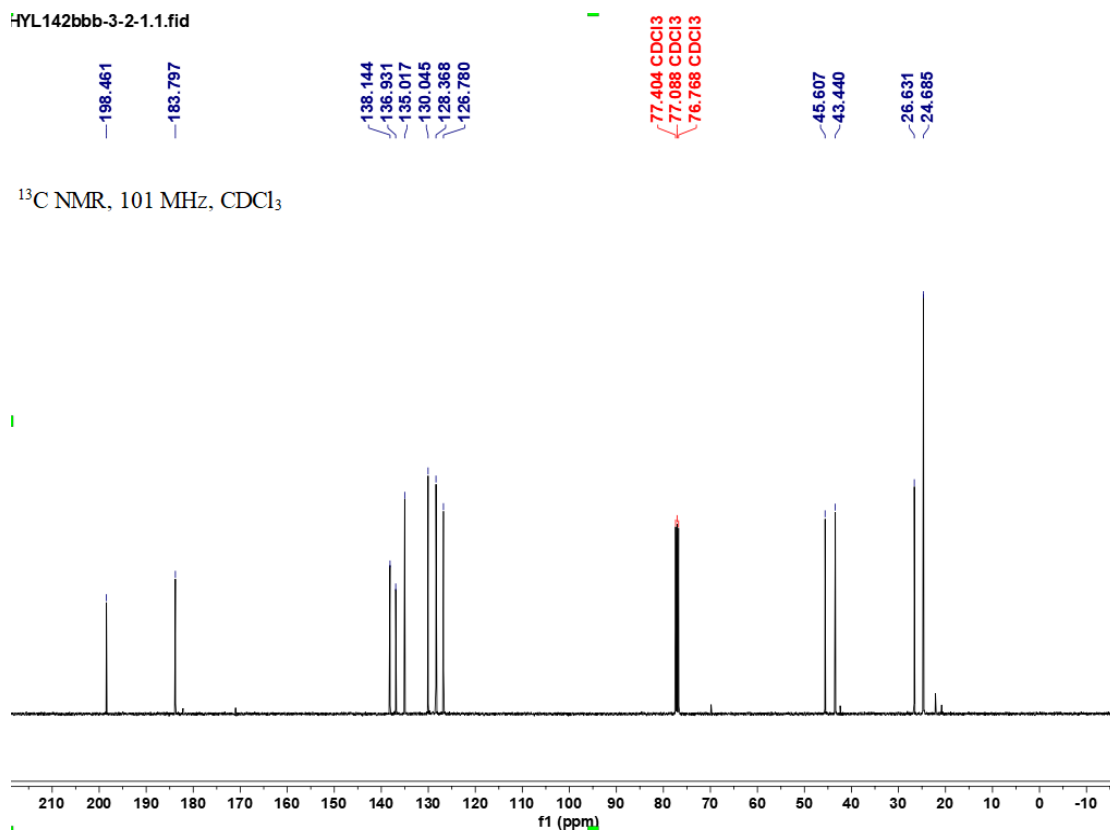

<sup>1</sup>H NMR (400 MHz) and <sup>13</sup>C NMR (101 MHz) spectra of **7-7**



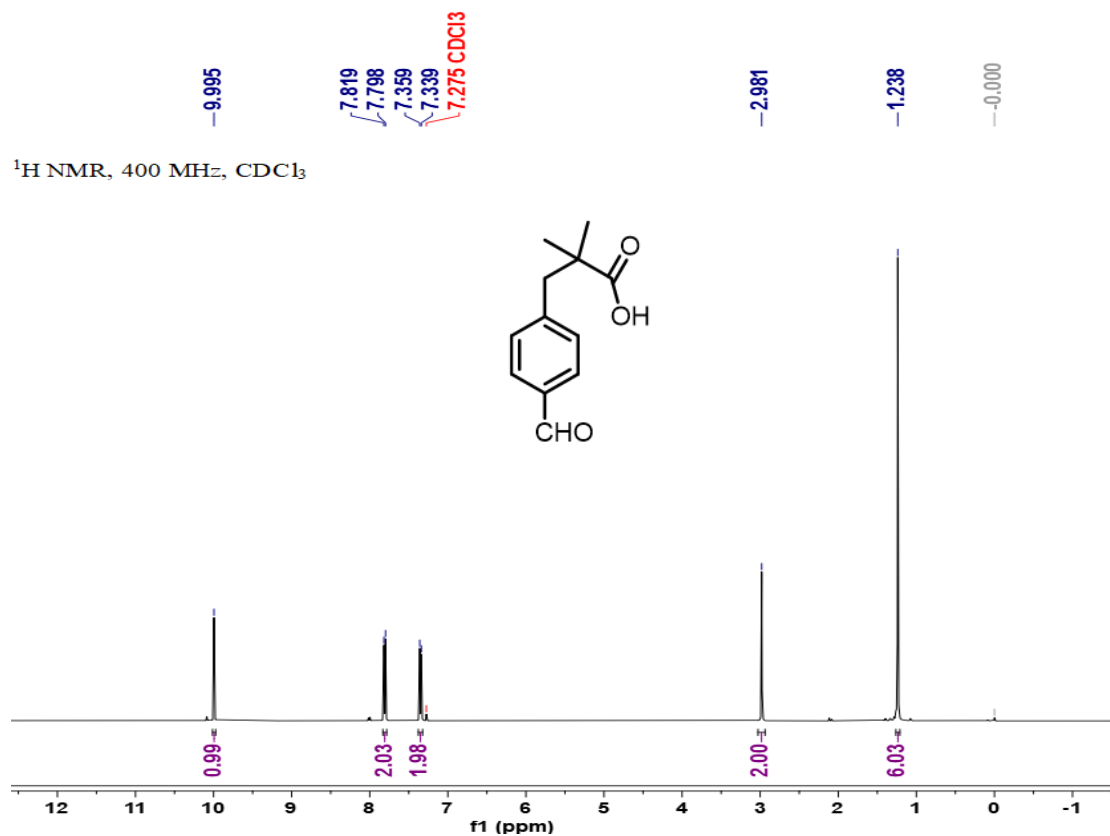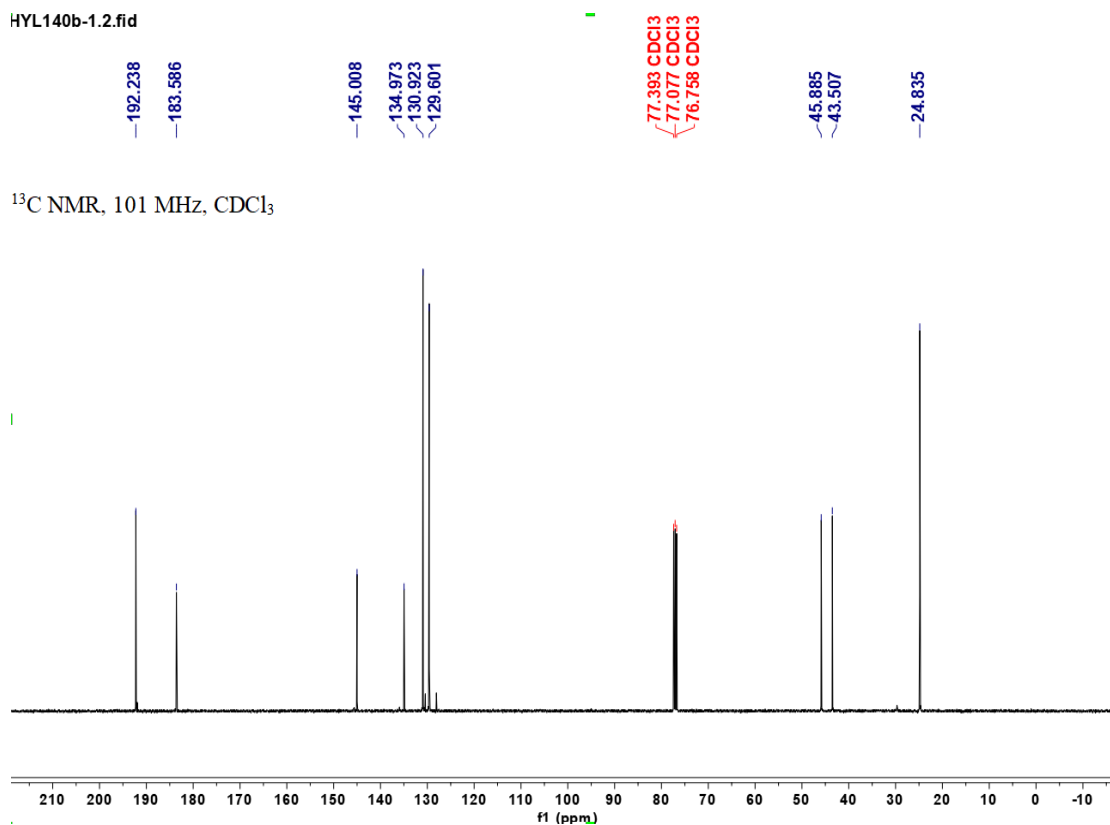

<sup>1</sup>H NMR (400 MHz) and <sup>13</sup>C NMR (101 MHz) spectra of **7-8**

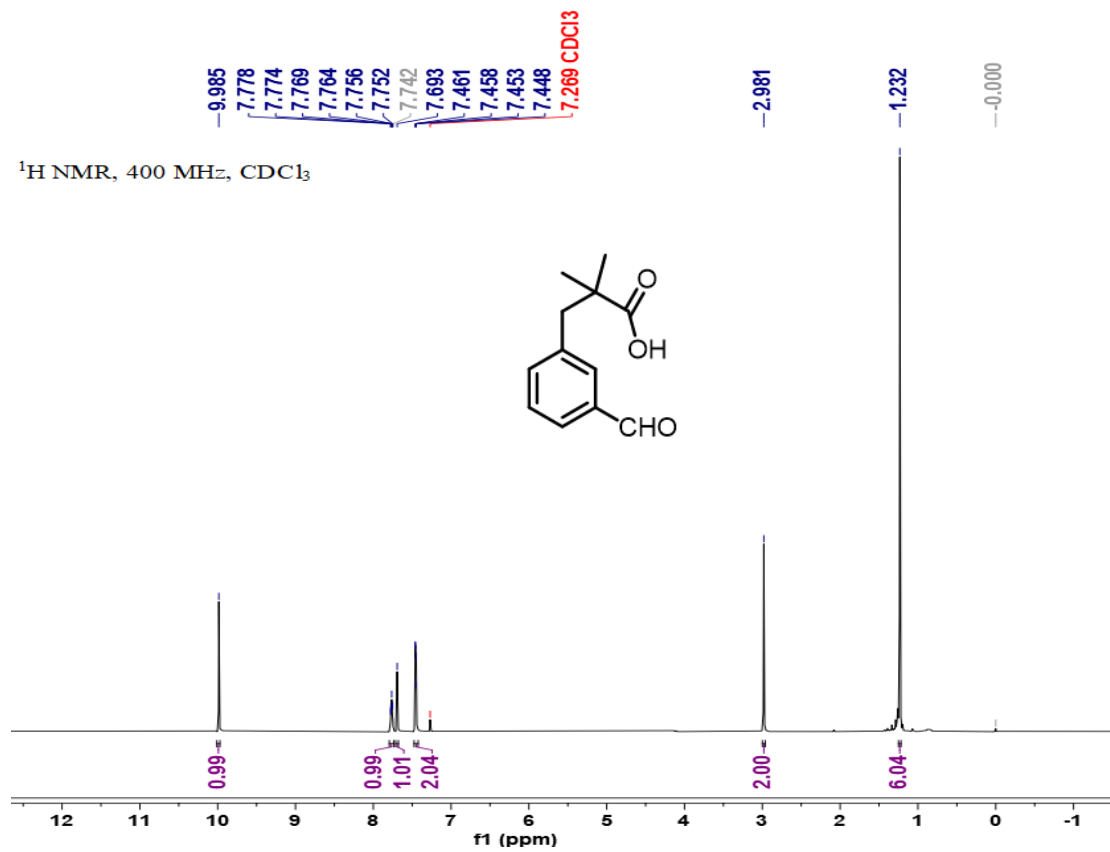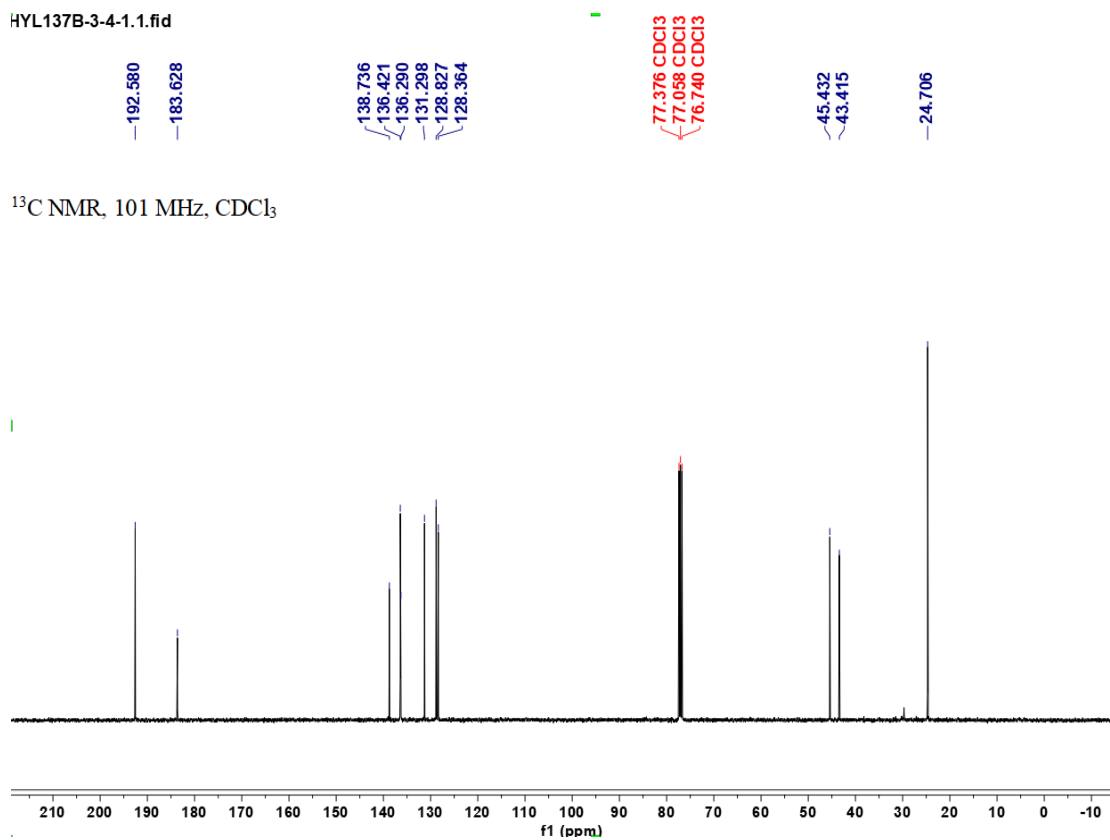

<sup>1</sup>H NMR (400 MHz) and <sup>13</sup>C NMR (101 MHz) spectra of **7-9**

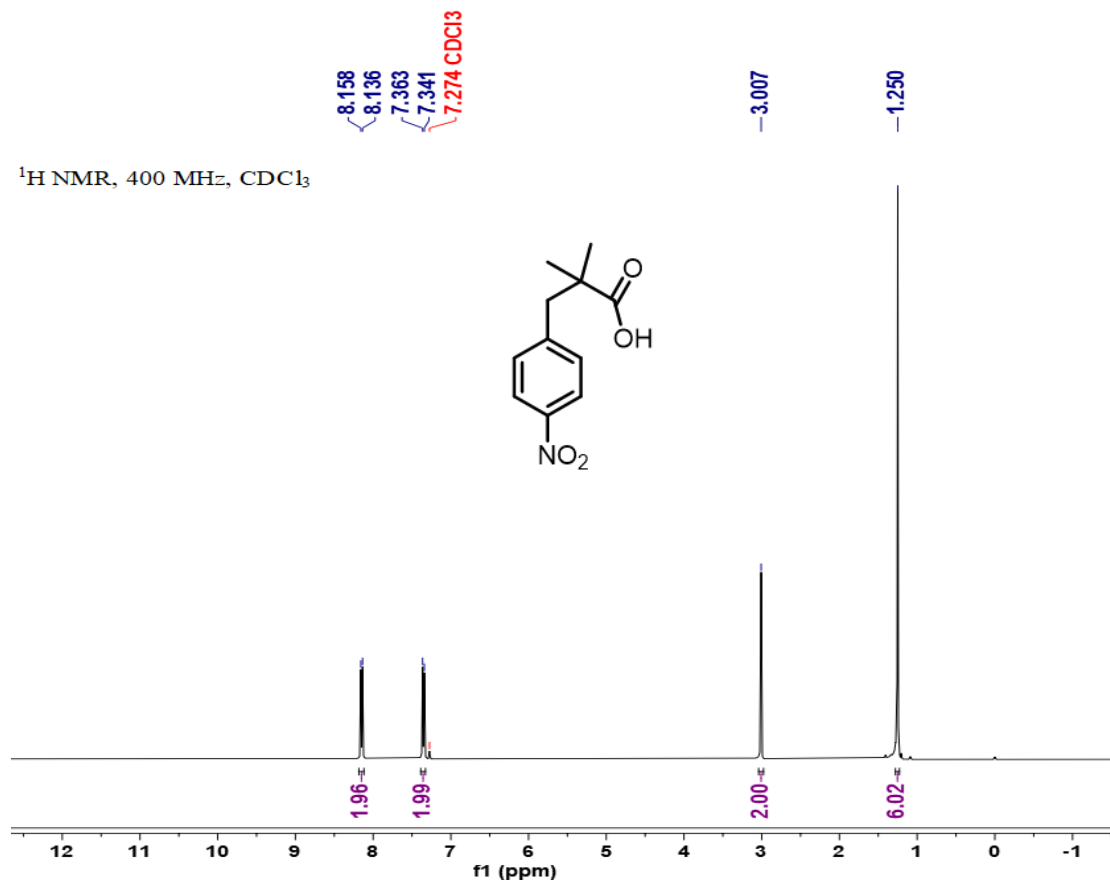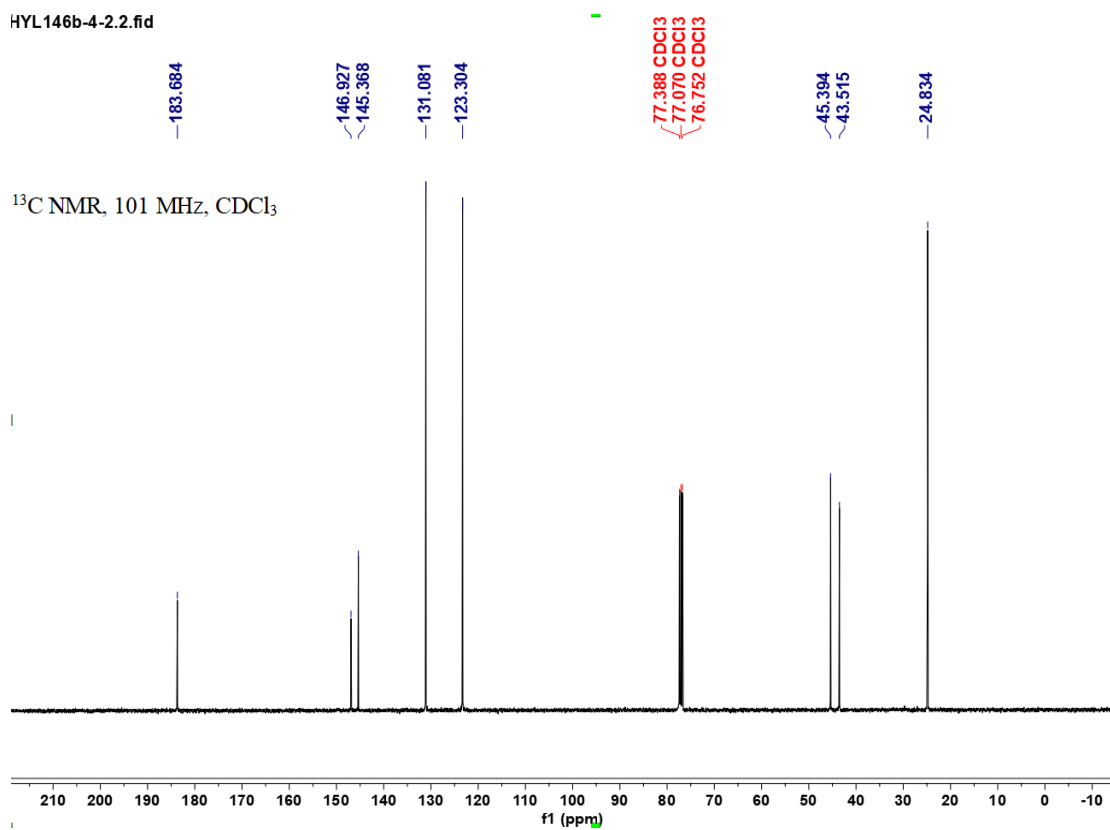

<sup>1</sup>H NMR (400 MHz) and <sup>13</sup>C NMR (101 MHz) spectra of **7-10**

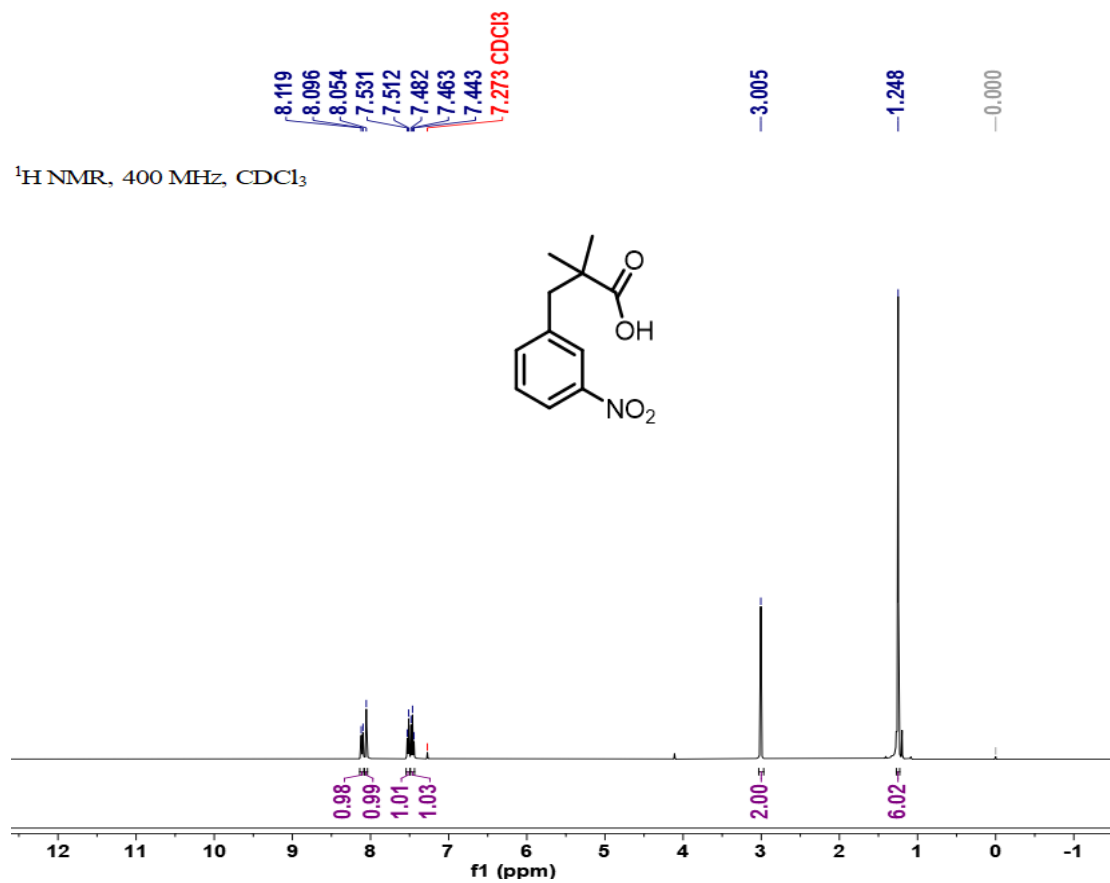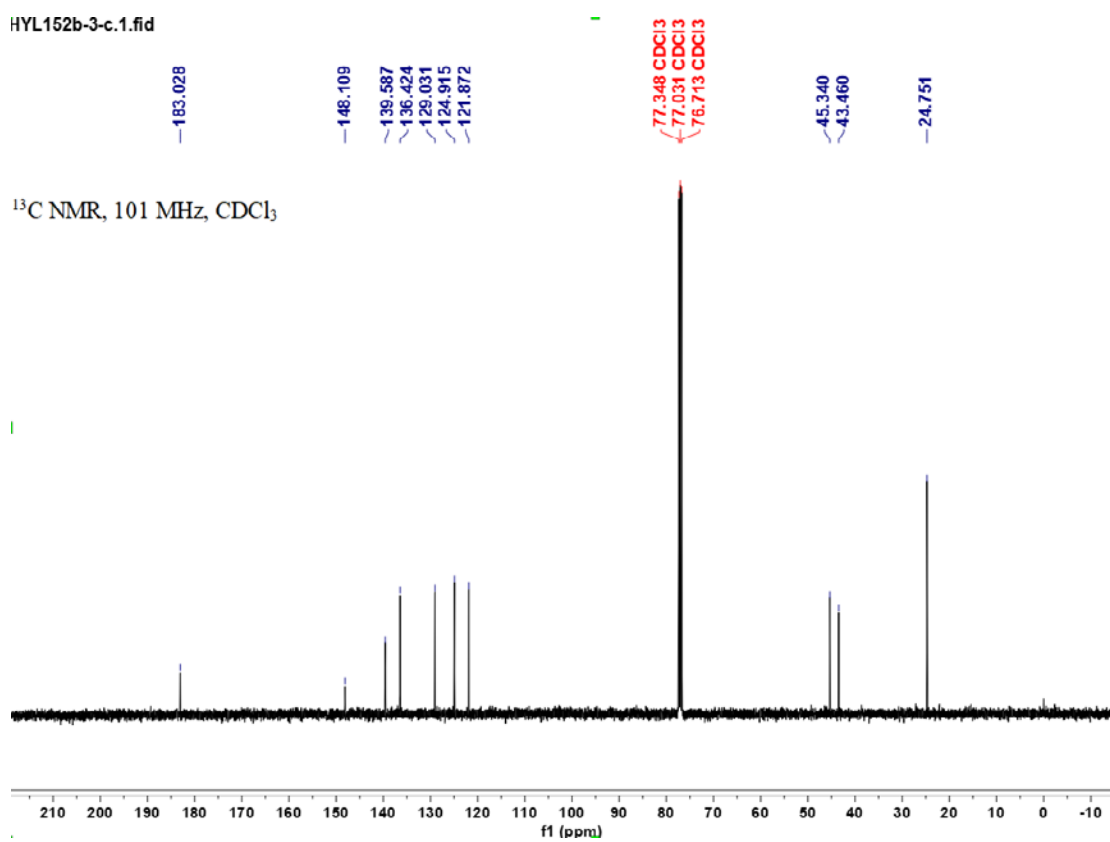

<sup>1</sup>H NMR (400 MHz) and <sup>13</sup>C NMR (101 MHz) spectra of **7-11**

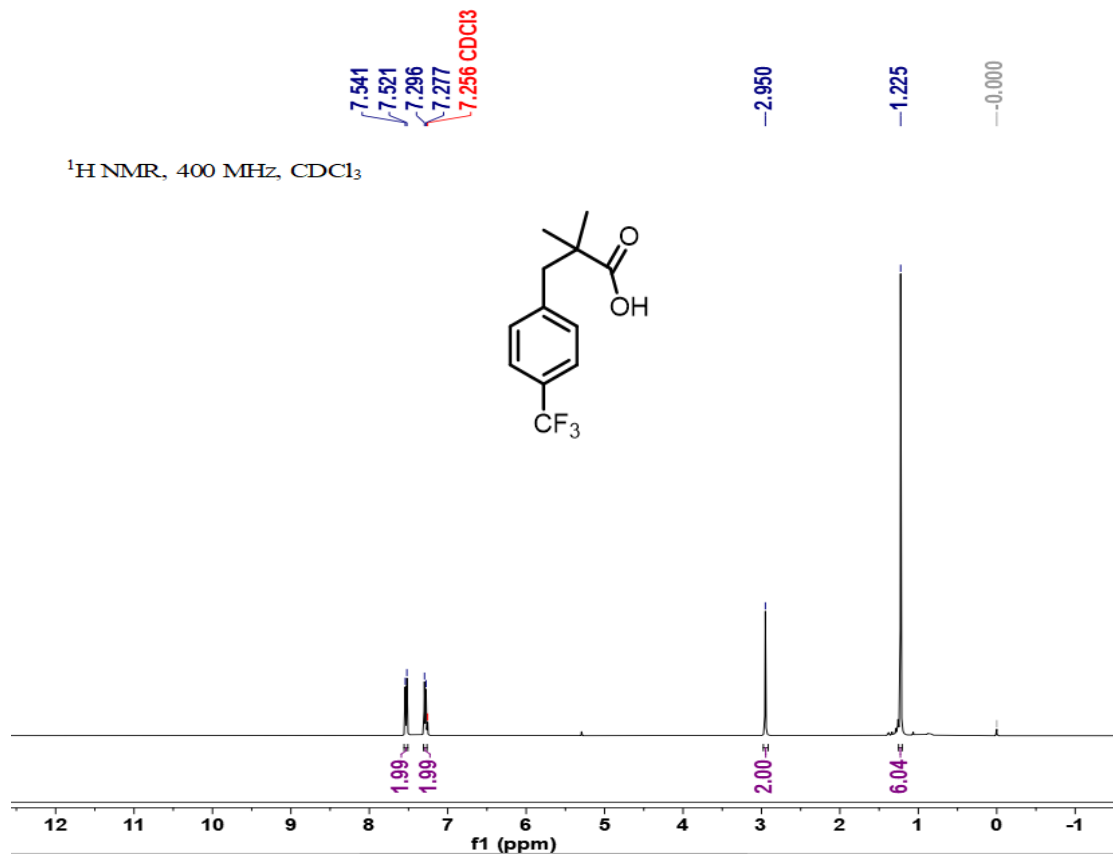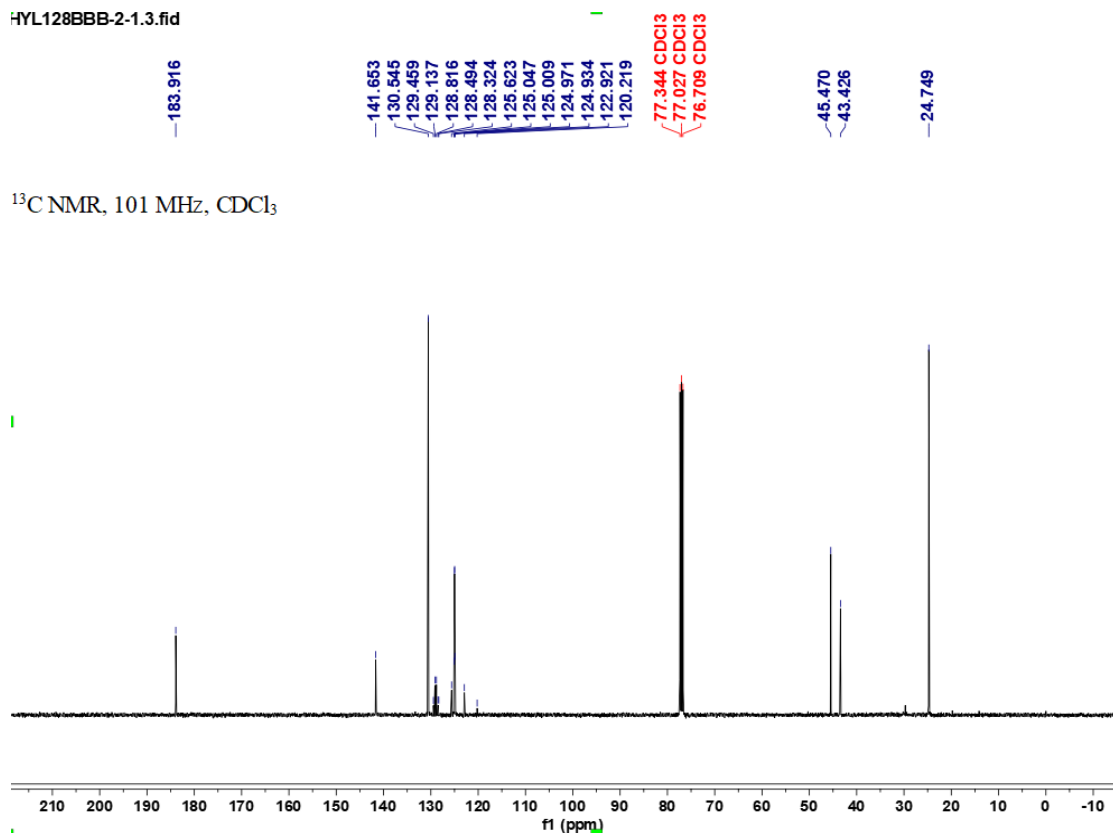

HYL128BBB-2-1.2.fid

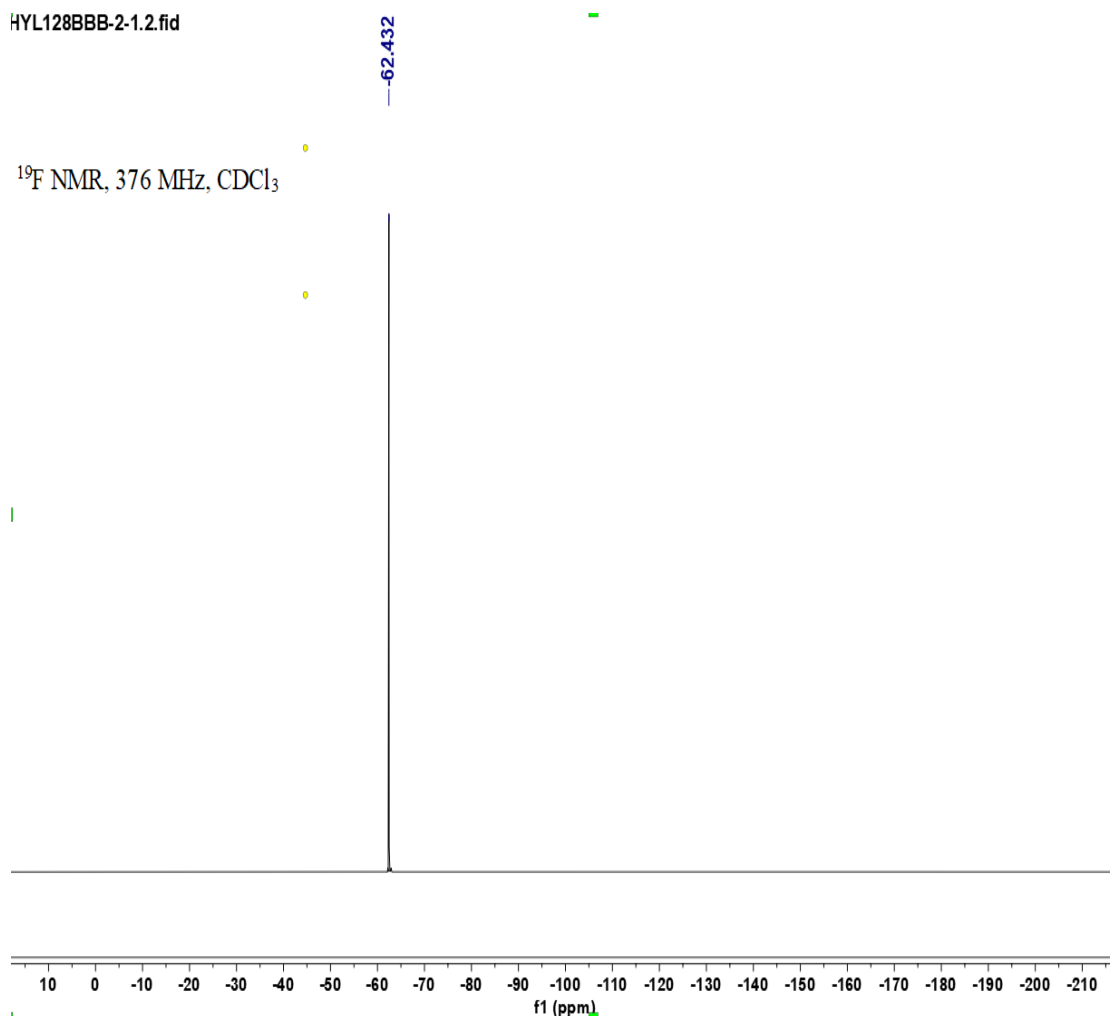

$^1\text{H}$  NMR (400 MHz),  $^{13}\text{C}$  NMR (101 MHz) and  $^{19}\text{F}$  NMR (376 MHz) spectra of **7-12**

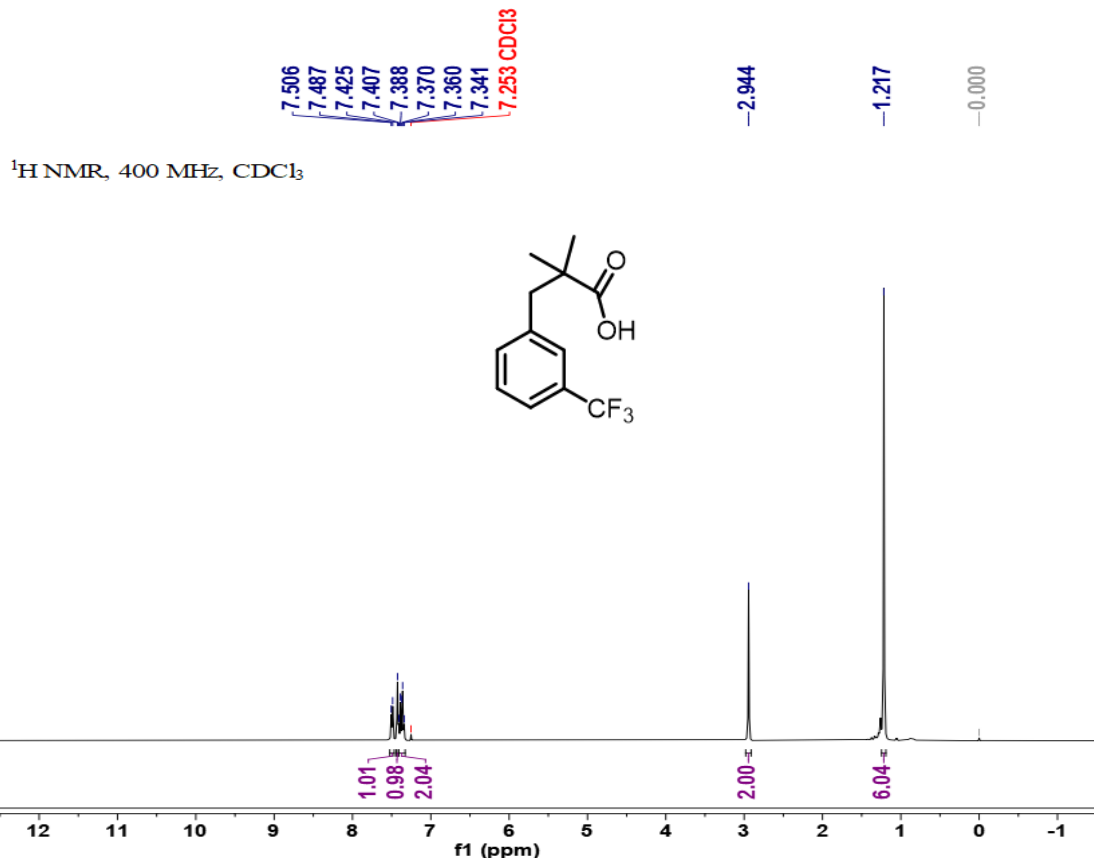

HYL134bb-1-2-1.2.fid

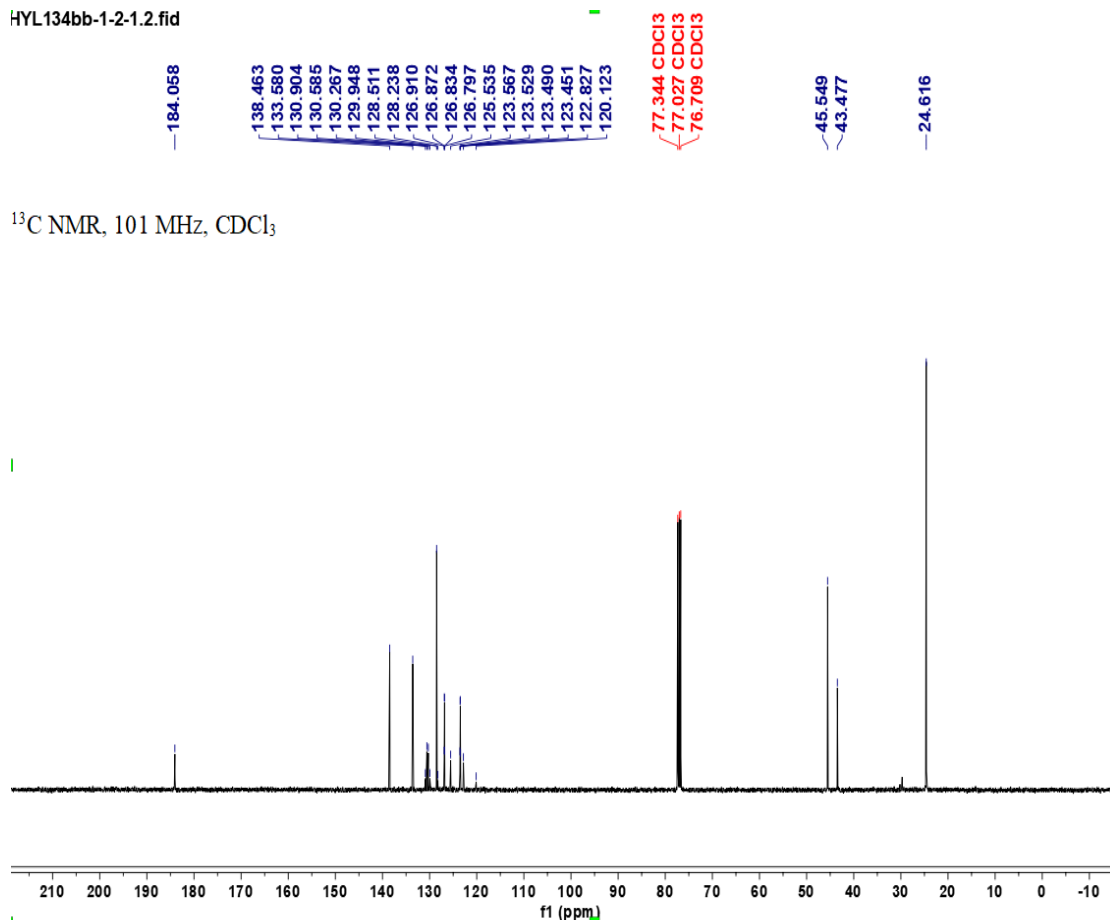

HYL134b1-2-14.1.fid

$^{19}\text{F}$  NMR, 376 MHz,  $\text{CDCl}_3$

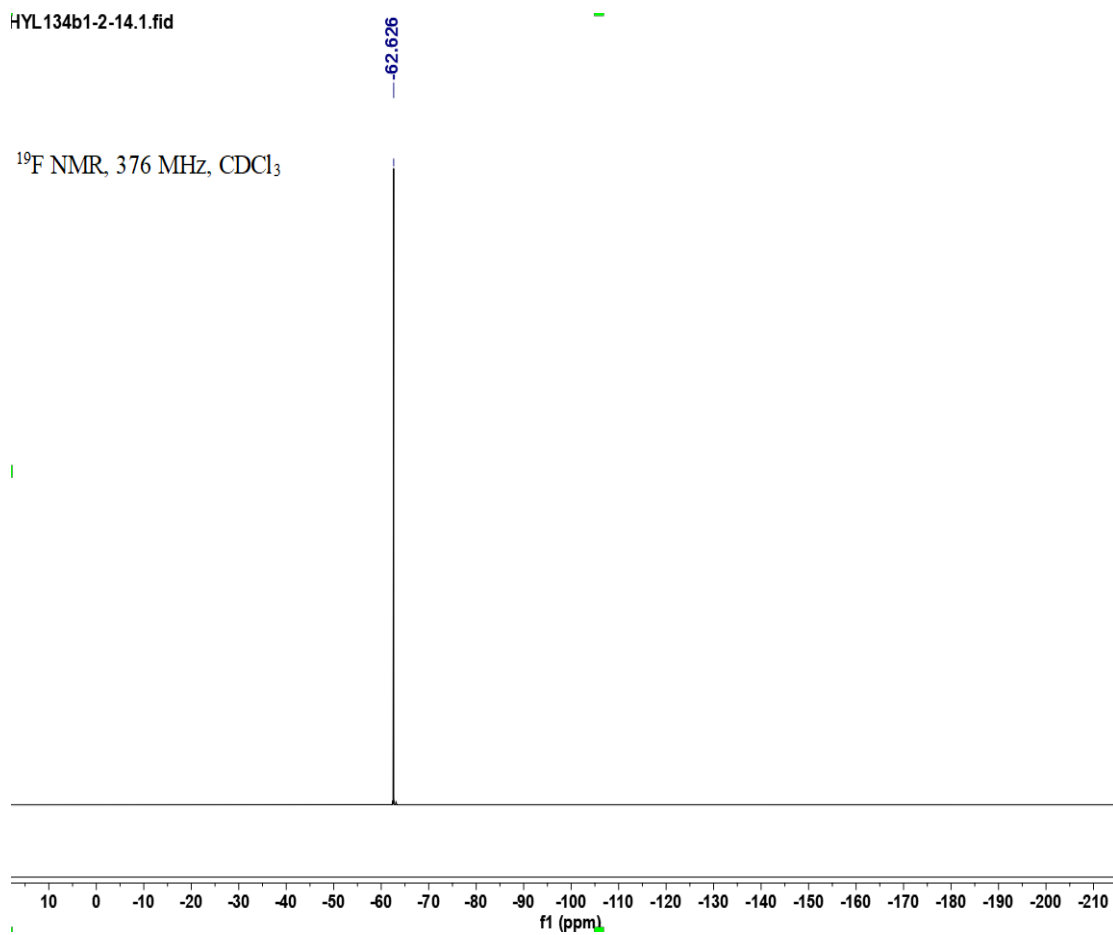

$^1\text{H}$  NMR (400 MHz),  $^{13}\text{C}$  NMR (101 MHz) and  $^{19}\text{F}$  NMR (376 MHz) spectra of **7-13**



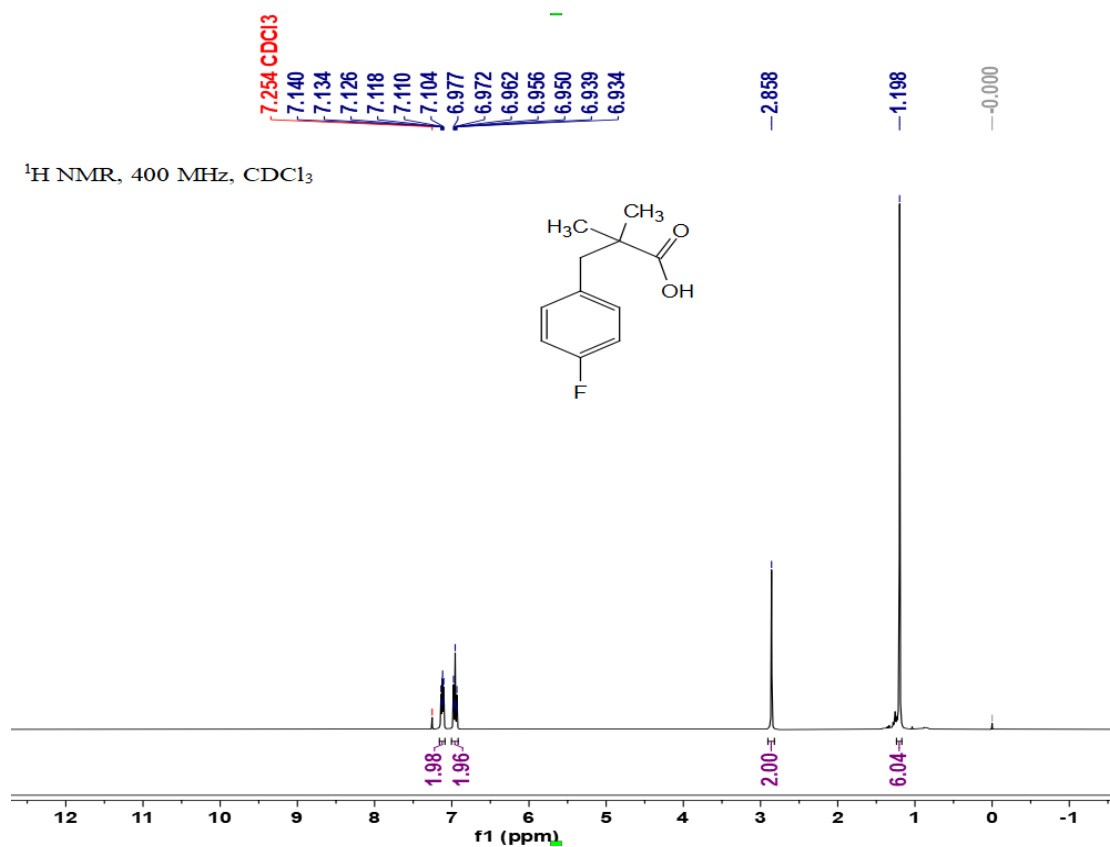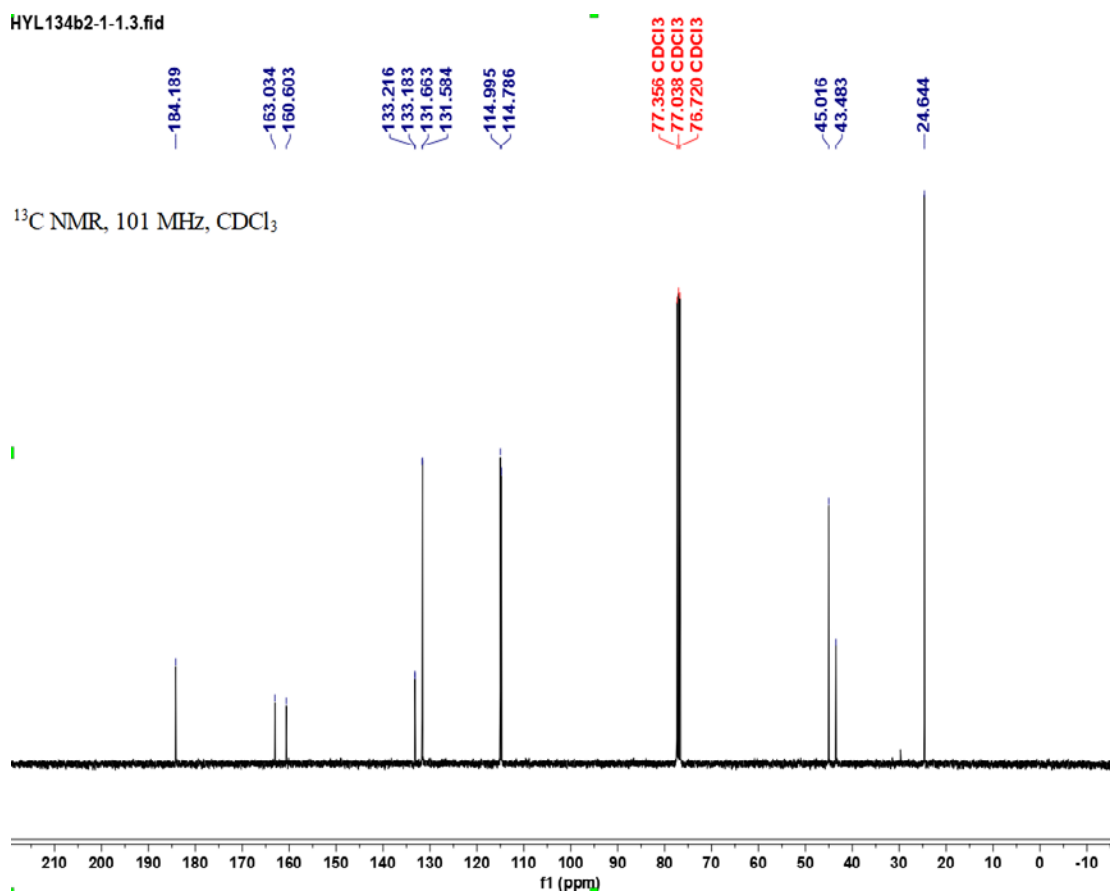

HYL134b2-1-1.2.fid

$^{19}\text{F}$  NMR, 376 MHz,  $\text{CDCl}_3$

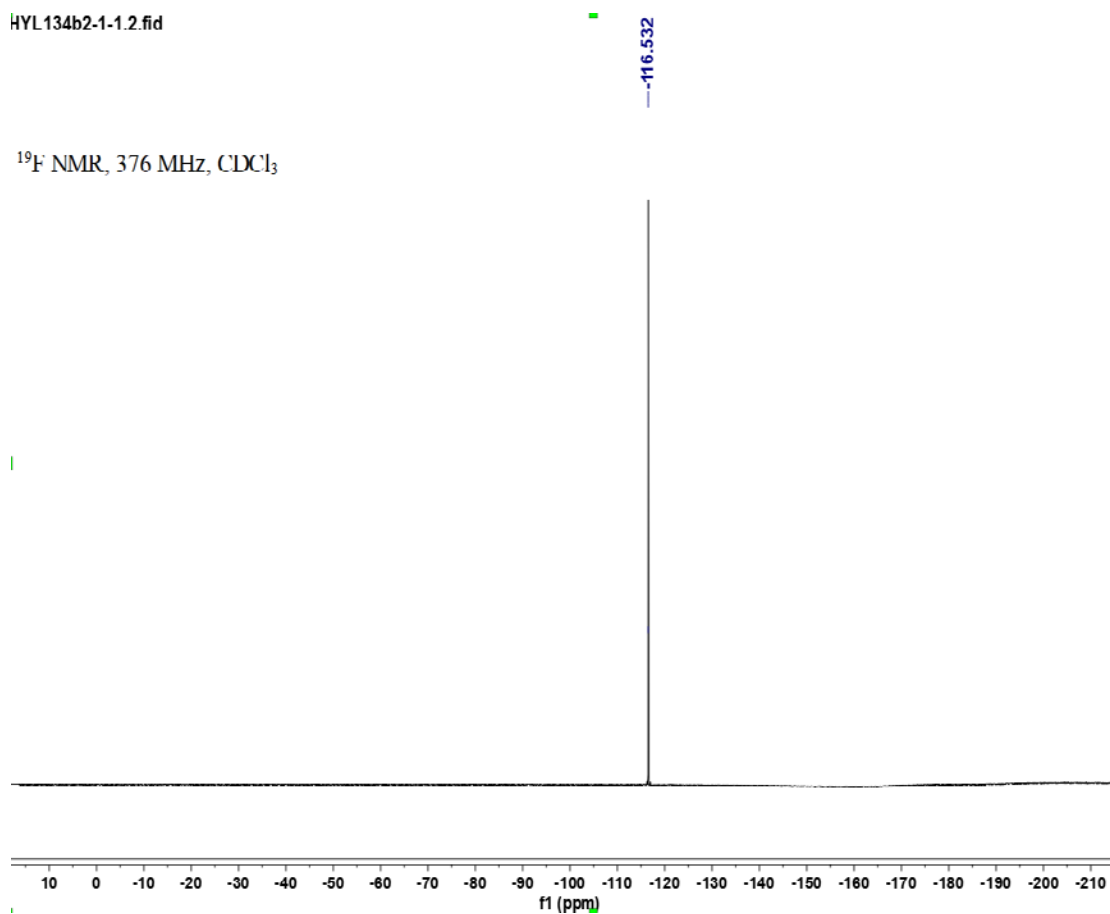

$^1\text{H}$  NMR (400 MHz),  $^{13}\text{C}$  NMR (101 MHz) and  $^{19}\text{F}$  NMR (376 MHz) spectra of **7-14**

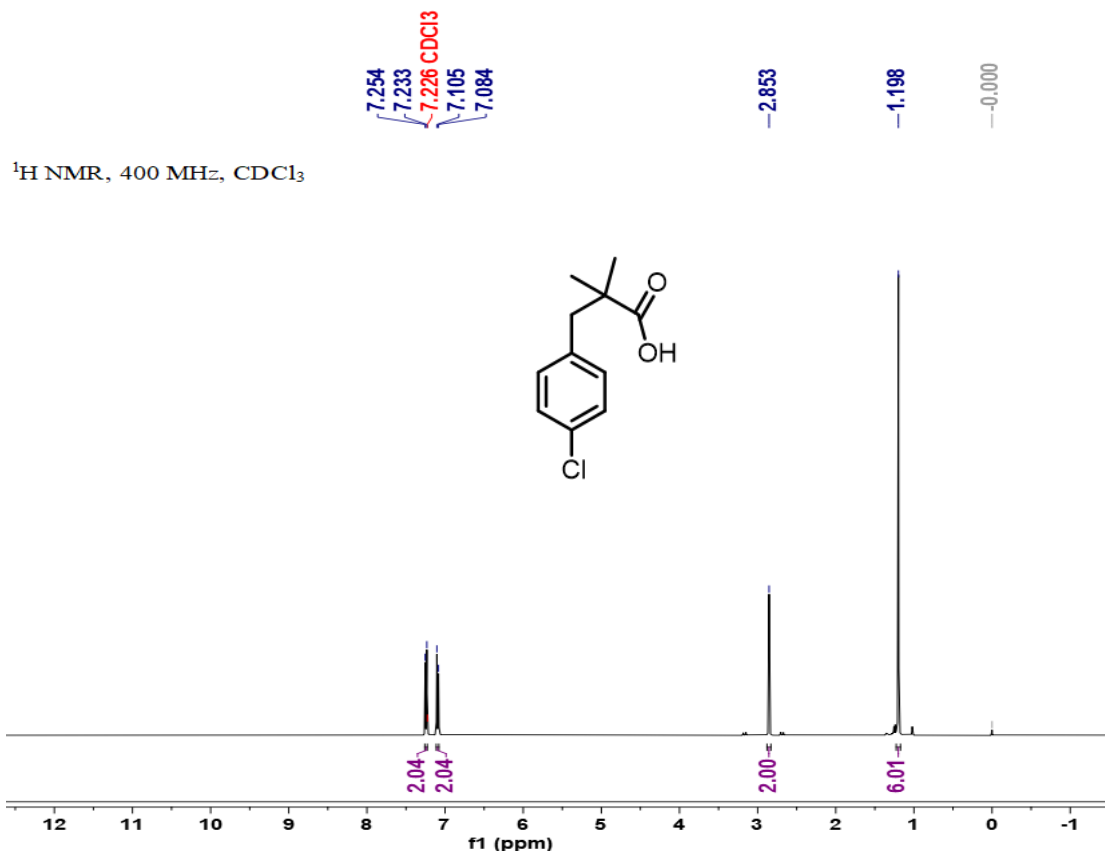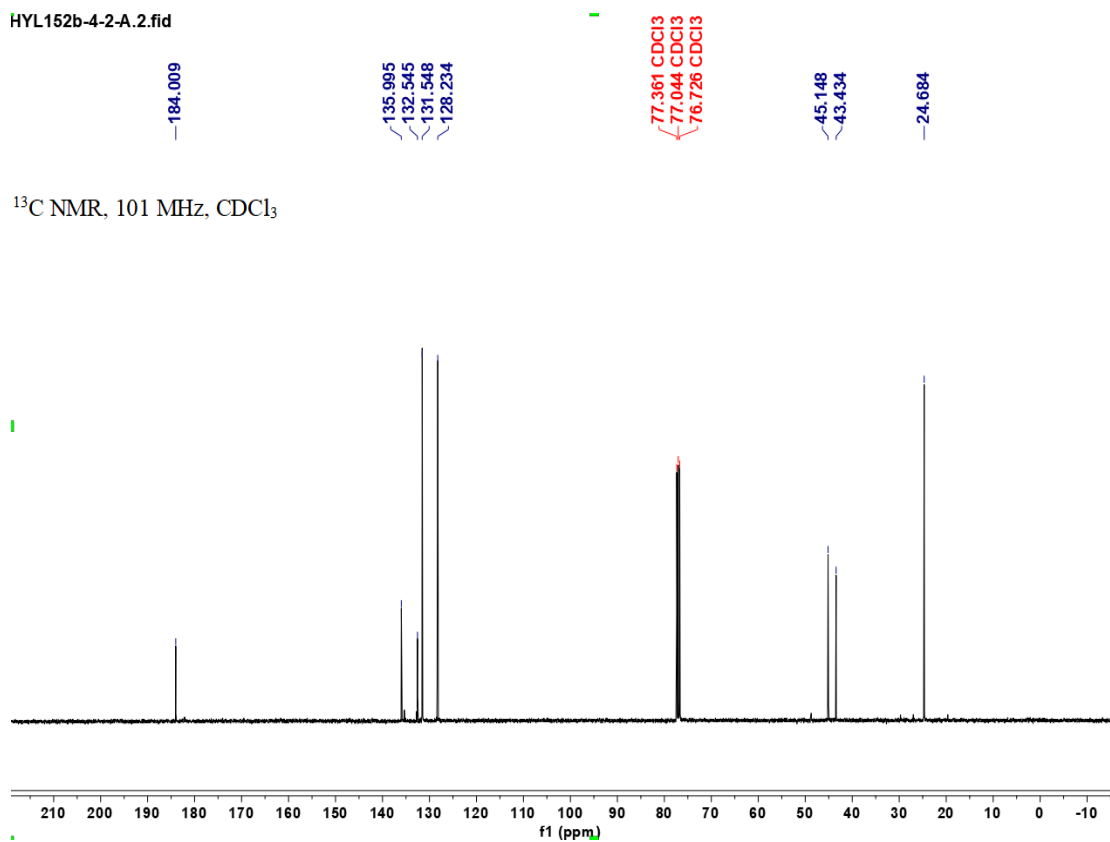

<sup>1</sup>H NMR (400 MHz) and <sup>13</sup>C NMR (101 MHz) spectra of **7-15**

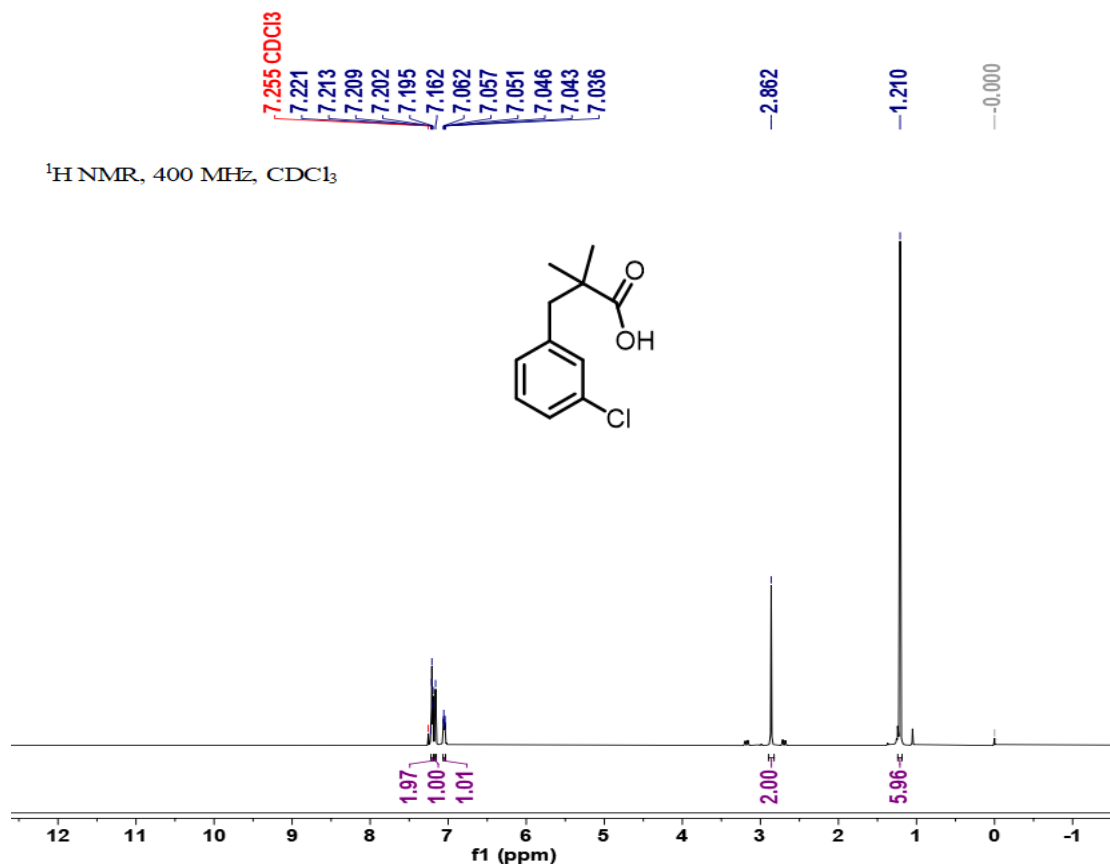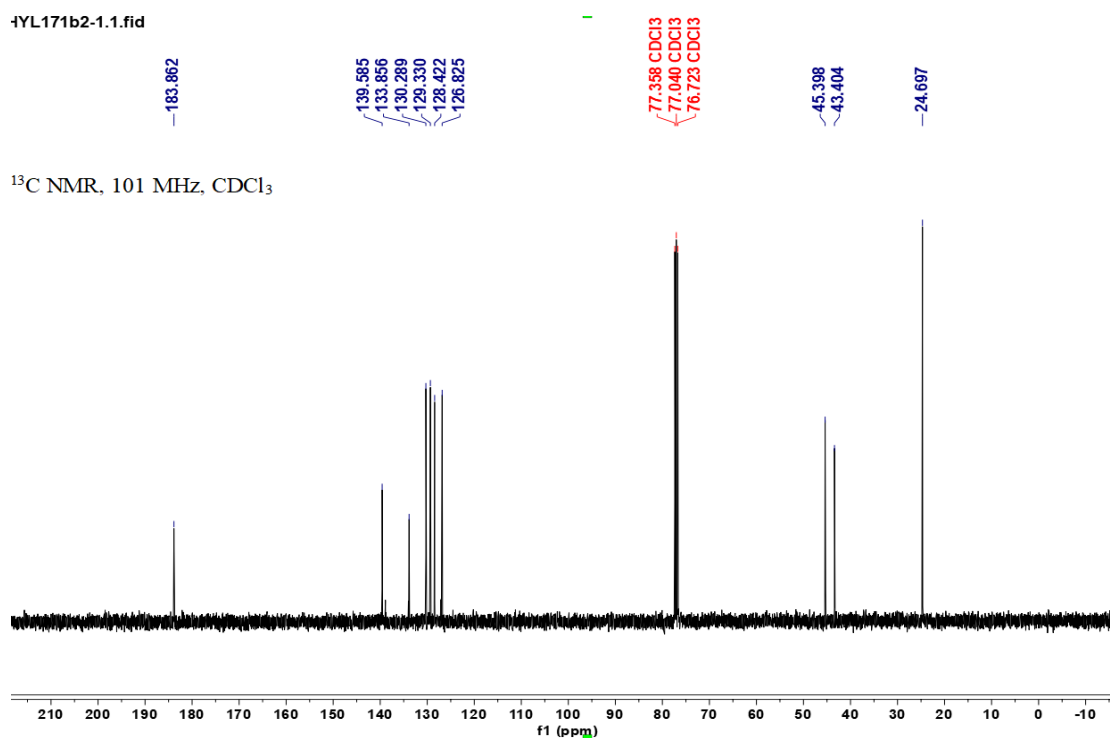

<sup>1</sup>H NMR (400 MHz) and <sup>13</sup>C NMR (101 MHz) spectra of 7-16

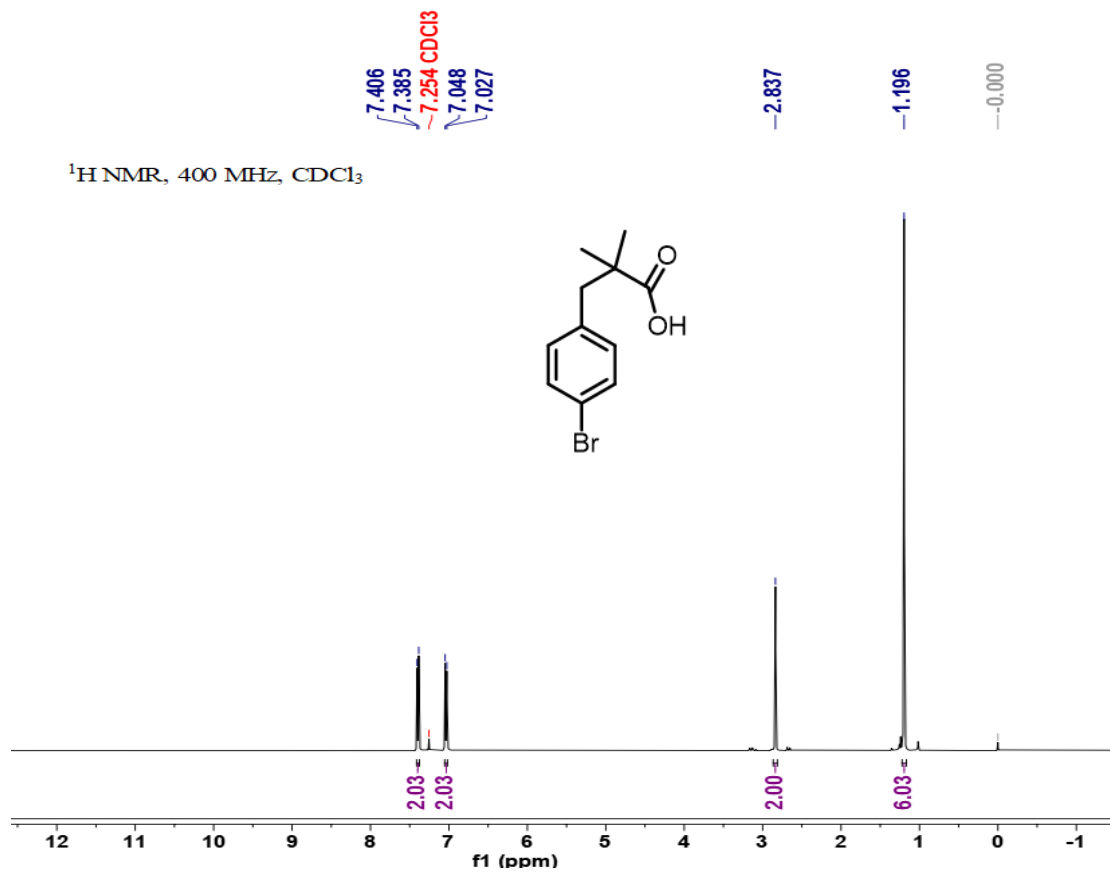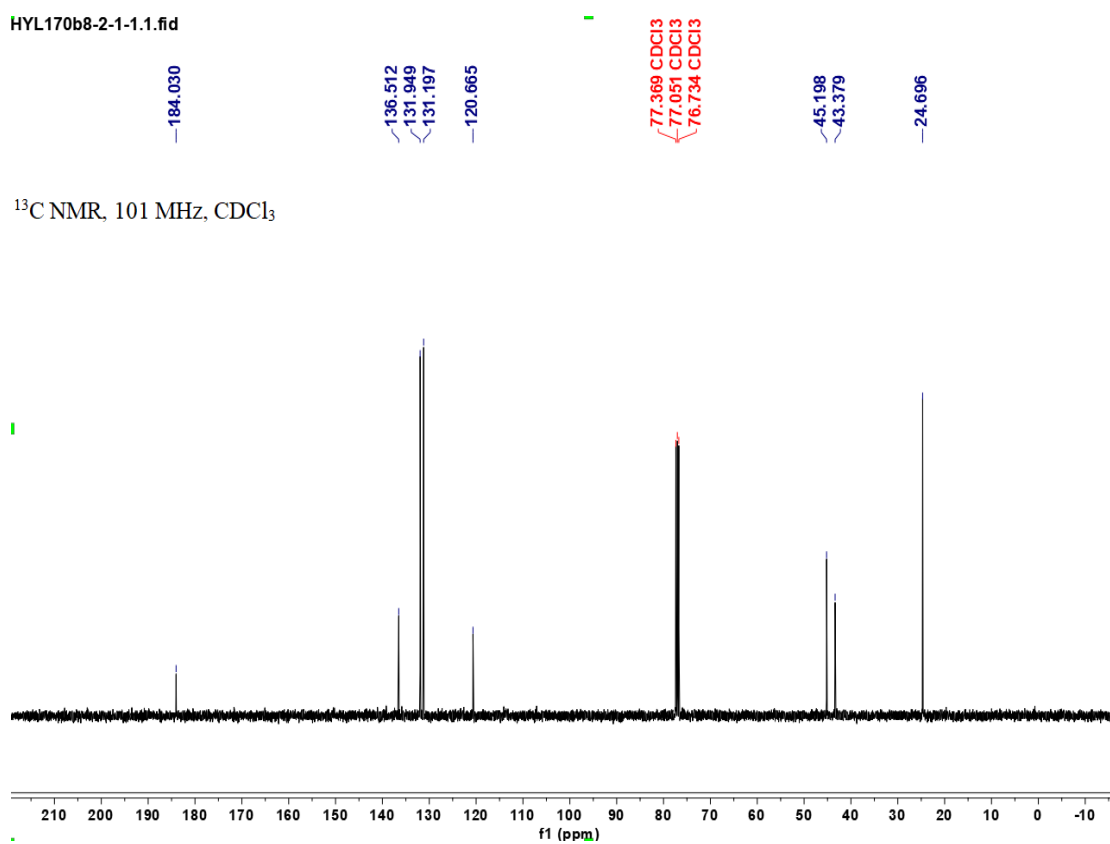

<sup>1</sup>H NMR (400 MHz) and <sup>13</sup>C NMR (101 MHz) spectra of **7-17**

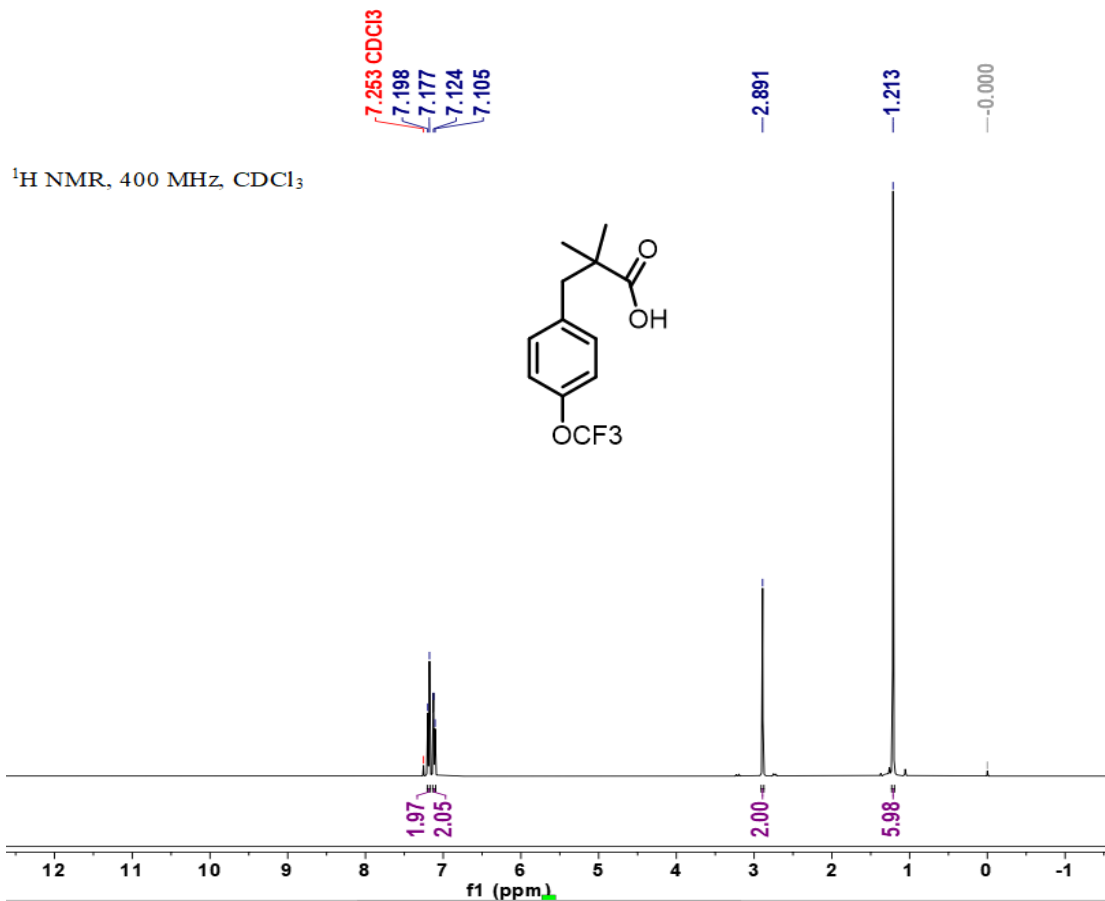

HYL132BBB-1-2.1.fid

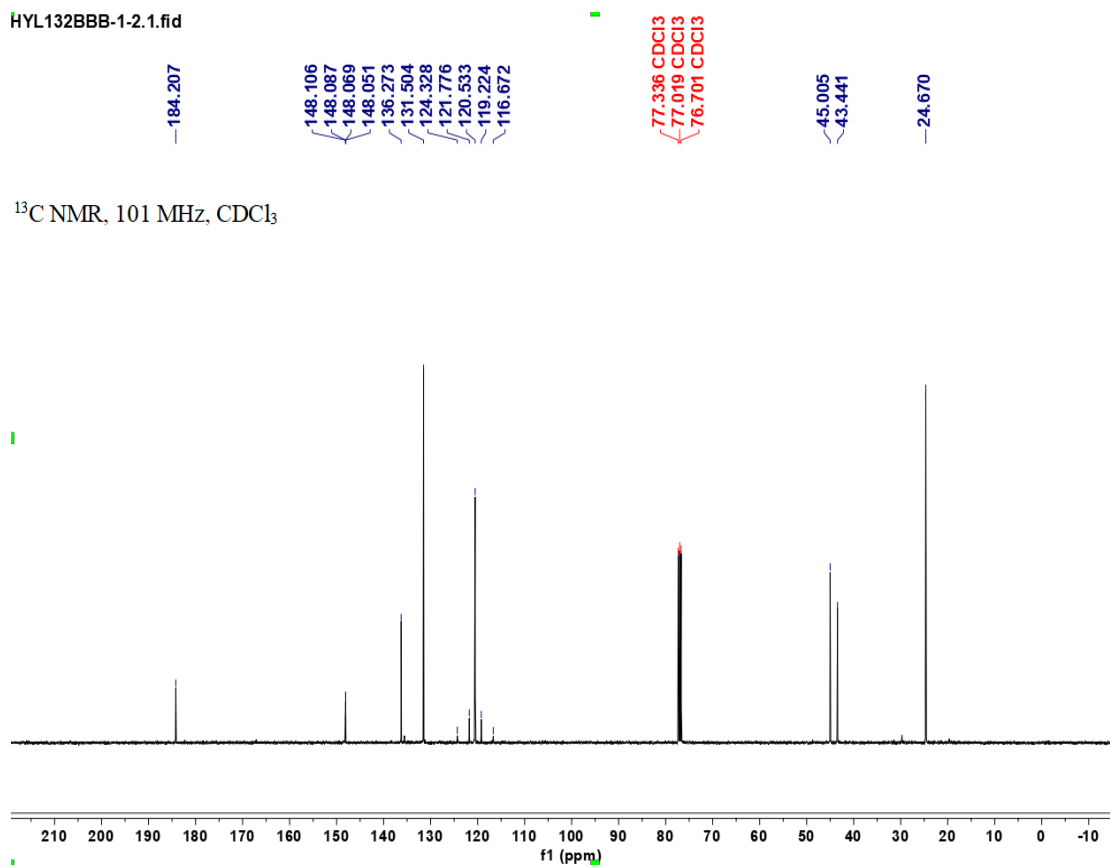

HYL132BBB-1-2-1.1.fid

-57.910

$^{19}\text{F}$  NMR, 376 MHz,  $\text{CDCl}_3$

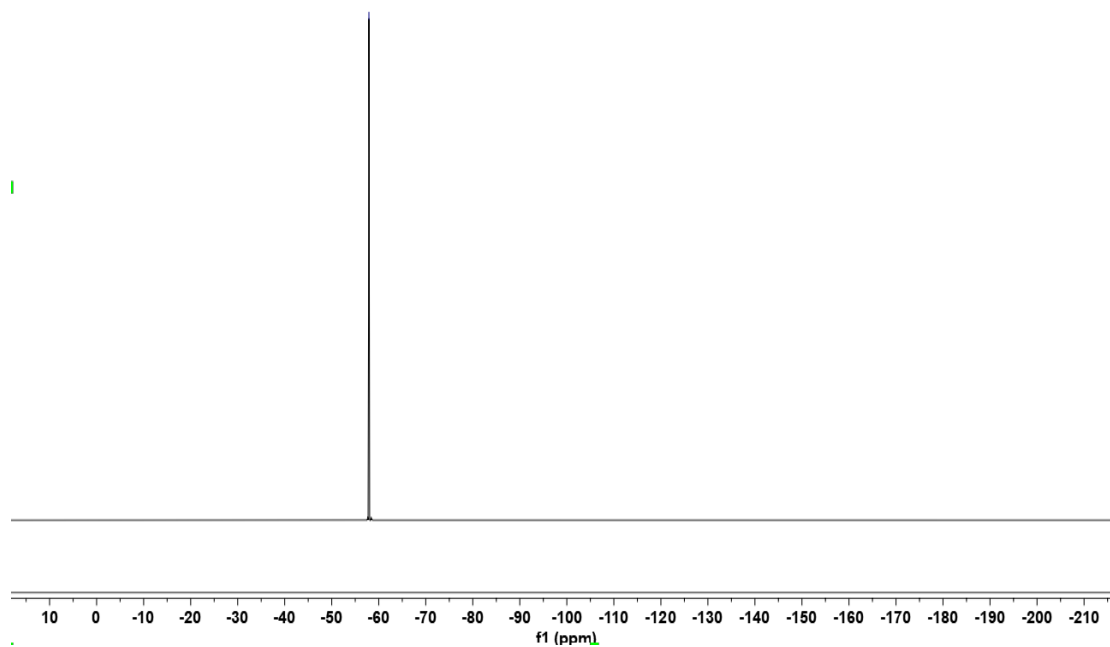

$^1\text{H}$  NMR (400 MHz),  $^{13}\text{C}$  NMR (101 MHz) and  $^{19}\text{F}$  NMR (376 MHz) spectra of **7-18**

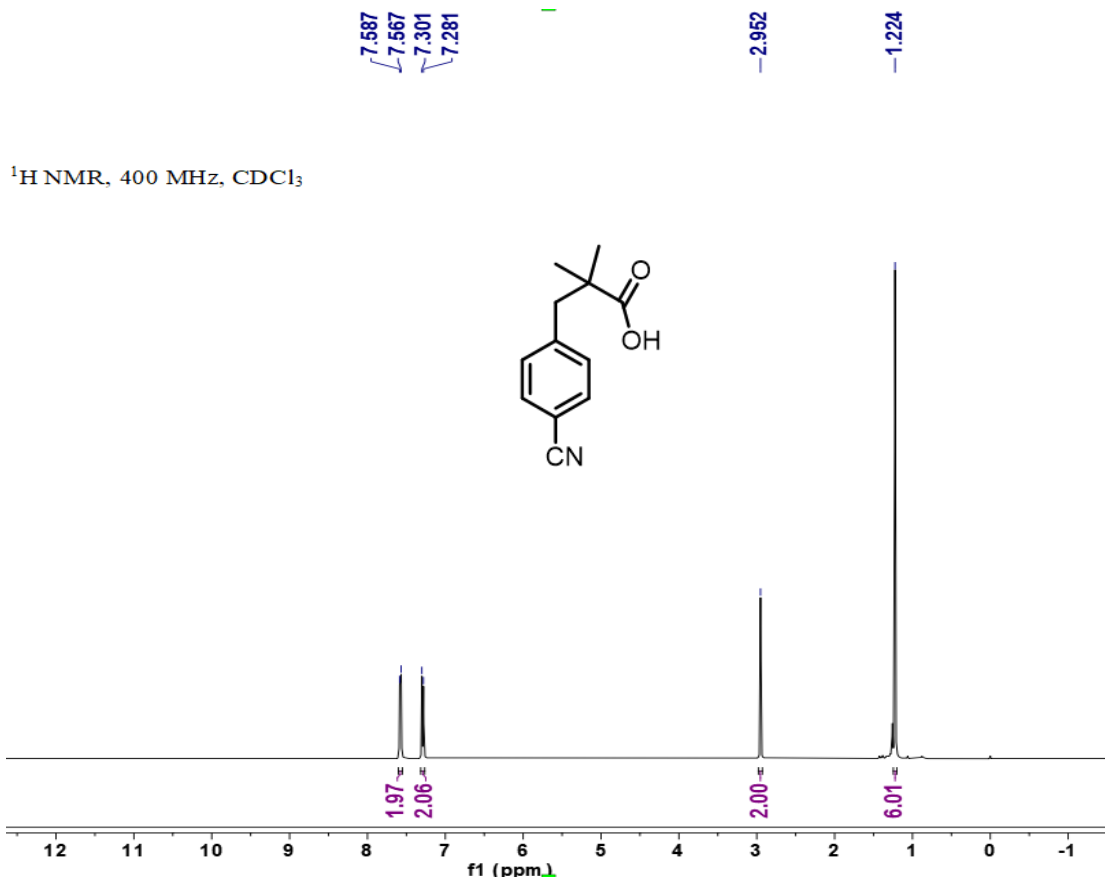

HYL180b4-2-1.1.fid

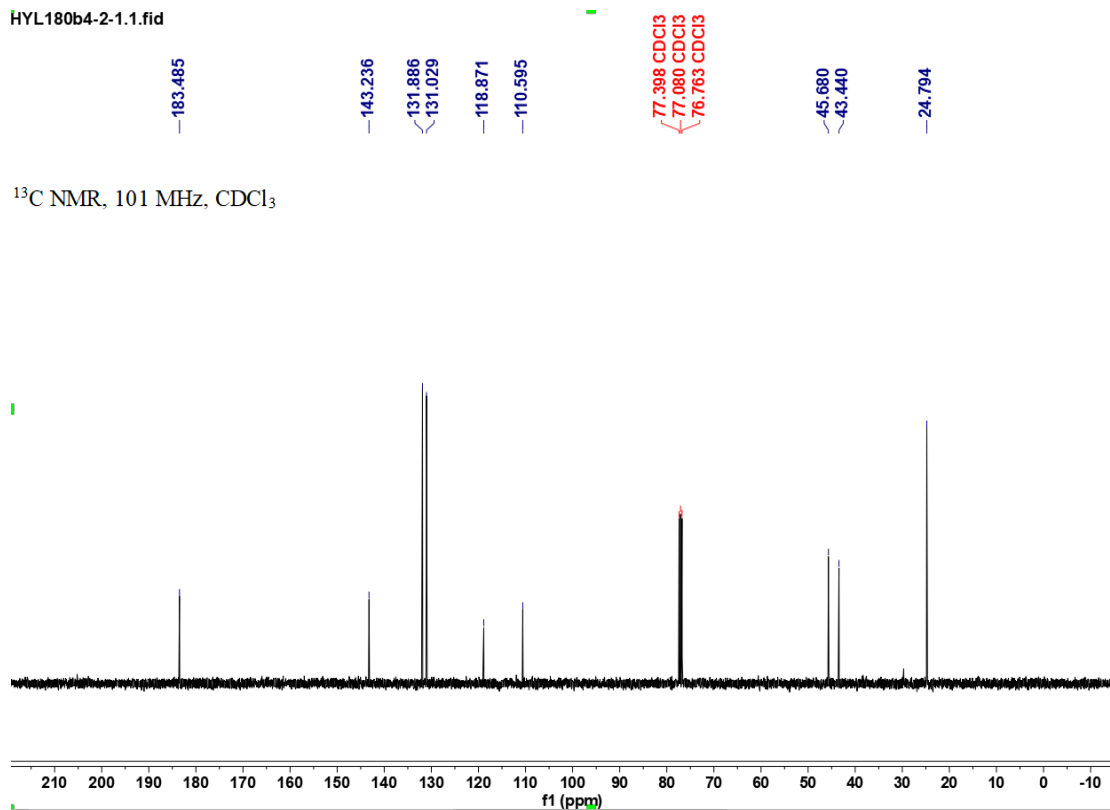

<sup>1</sup>H NMR (400 MHz) and <sup>13</sup>C NMR (101 MHz) spectra of **7-19**





HYL146b-1-1-1.2.fid

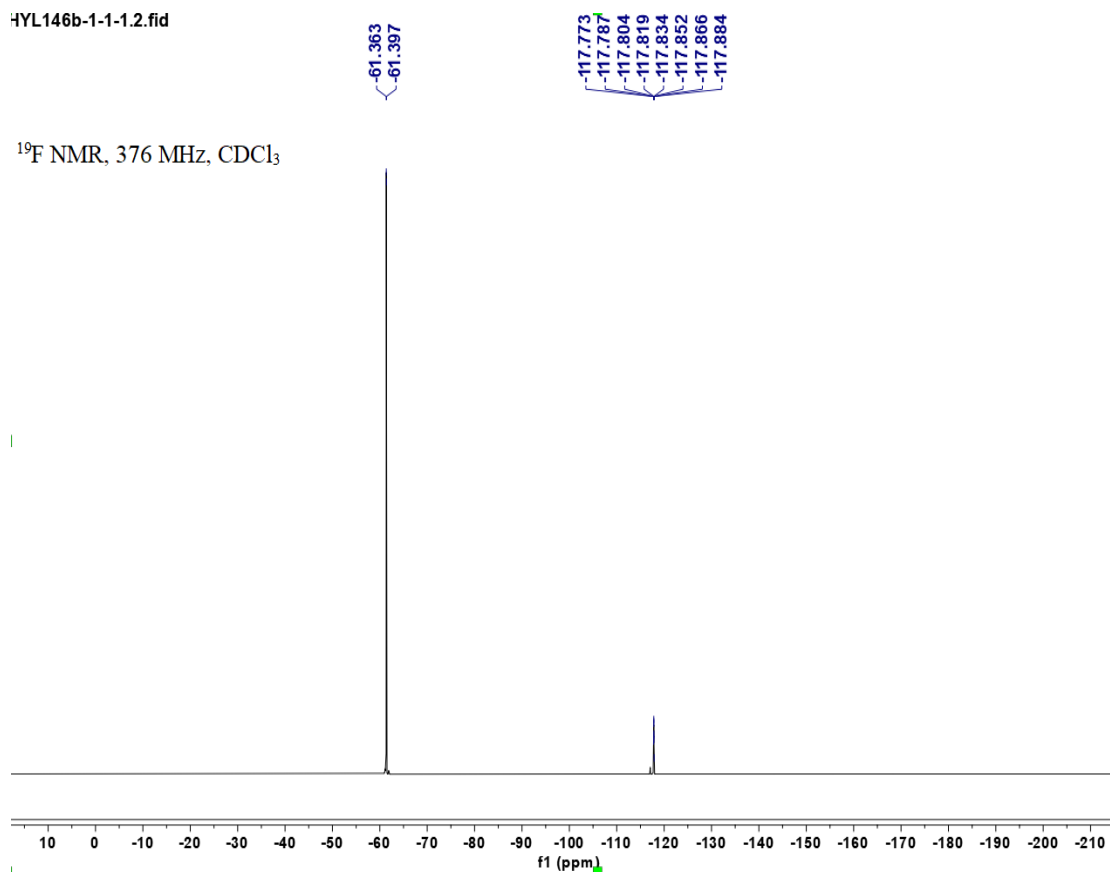

$^1\text{H}$  NMR (400 MHz),  $^{13}\text{C}$  NMR (101 MHz) and  $^{19}\text{F}$  NMR (376 MHz) spectra of **7-20**

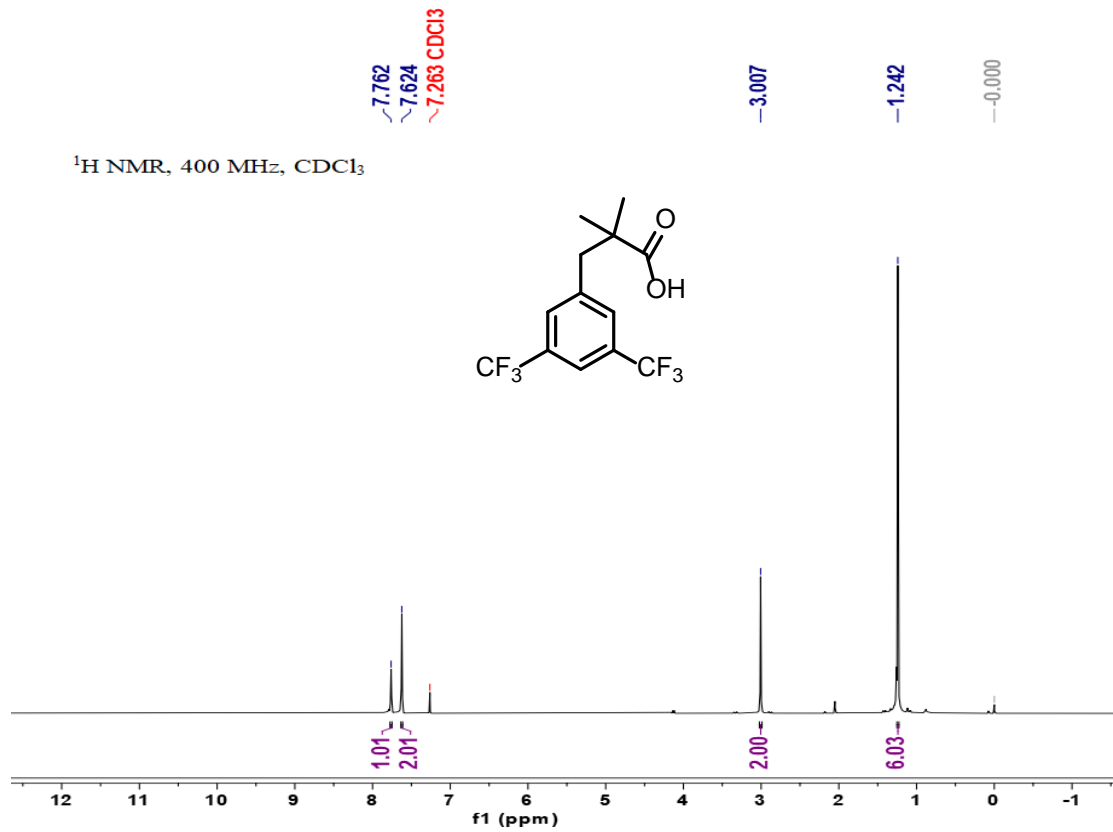

hyl153b-3-c.3.fid

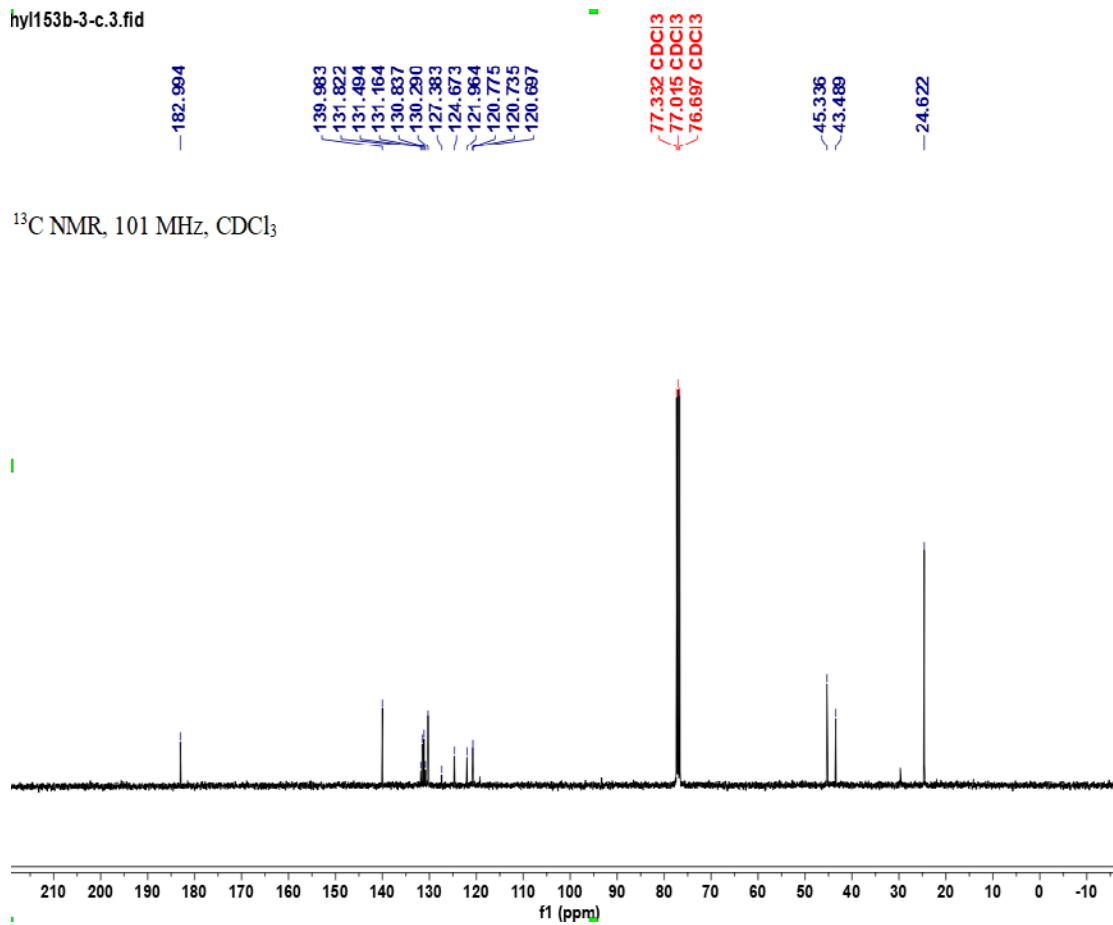

hy1153b-3-c.2.fid

$^{19}\text{F}$  NMR, 376 MHz,  $\text{CDCl}_3$

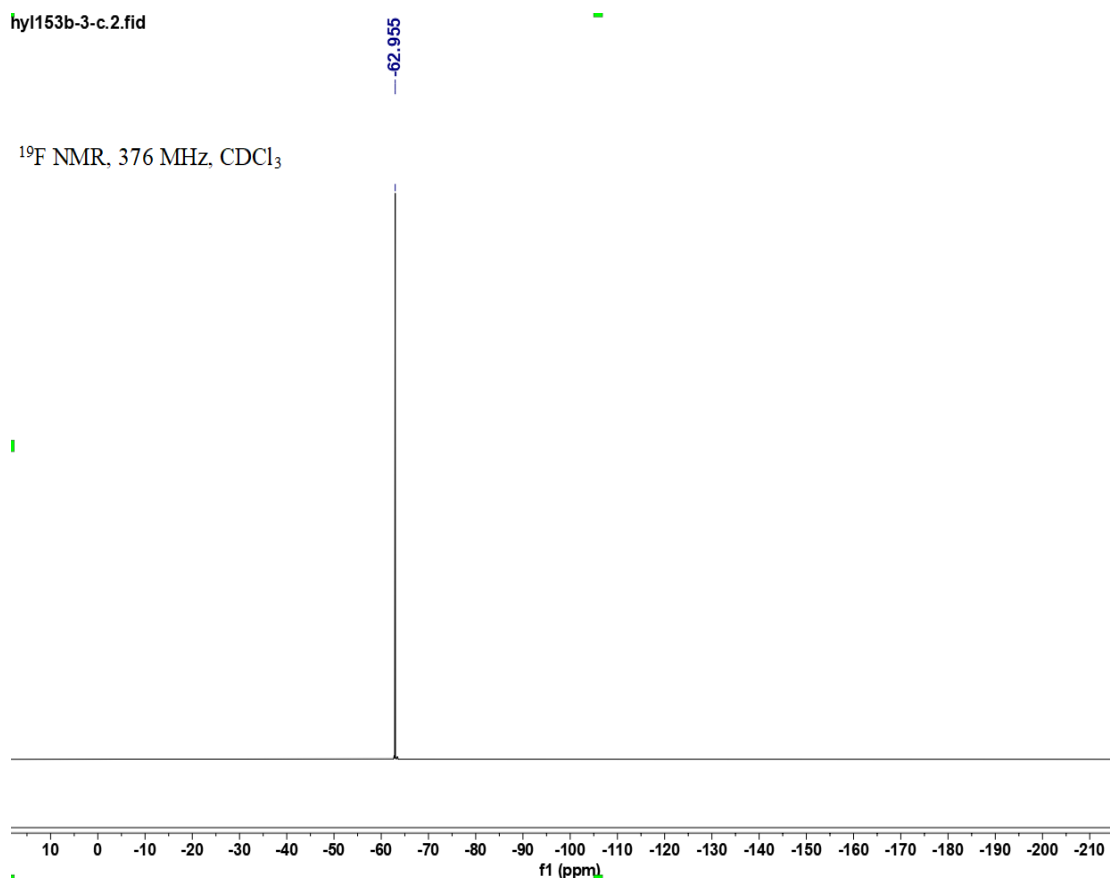

$^1\text{H}$  NMR (400 MHz),  $^{13}\text{C}$  NMR (101 MHz) and  $^{19}\text{F}$  NMR (376 MHz) spectra of **7-21**

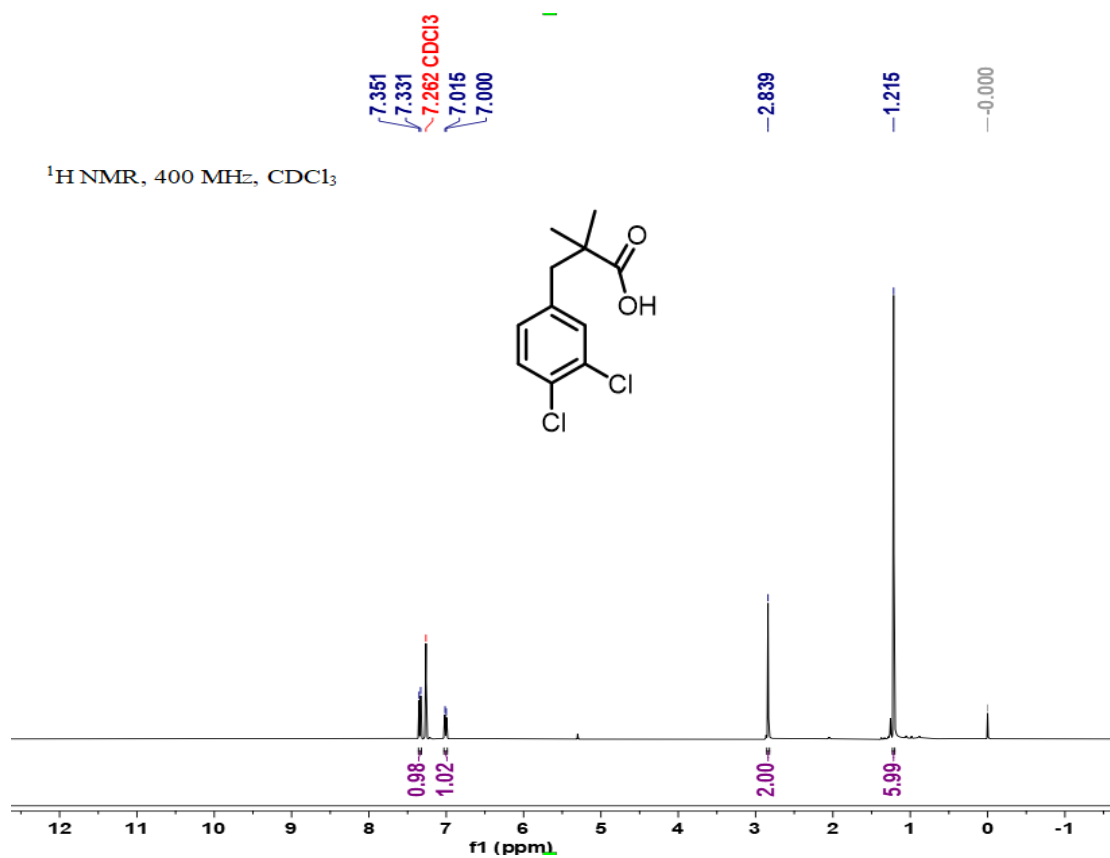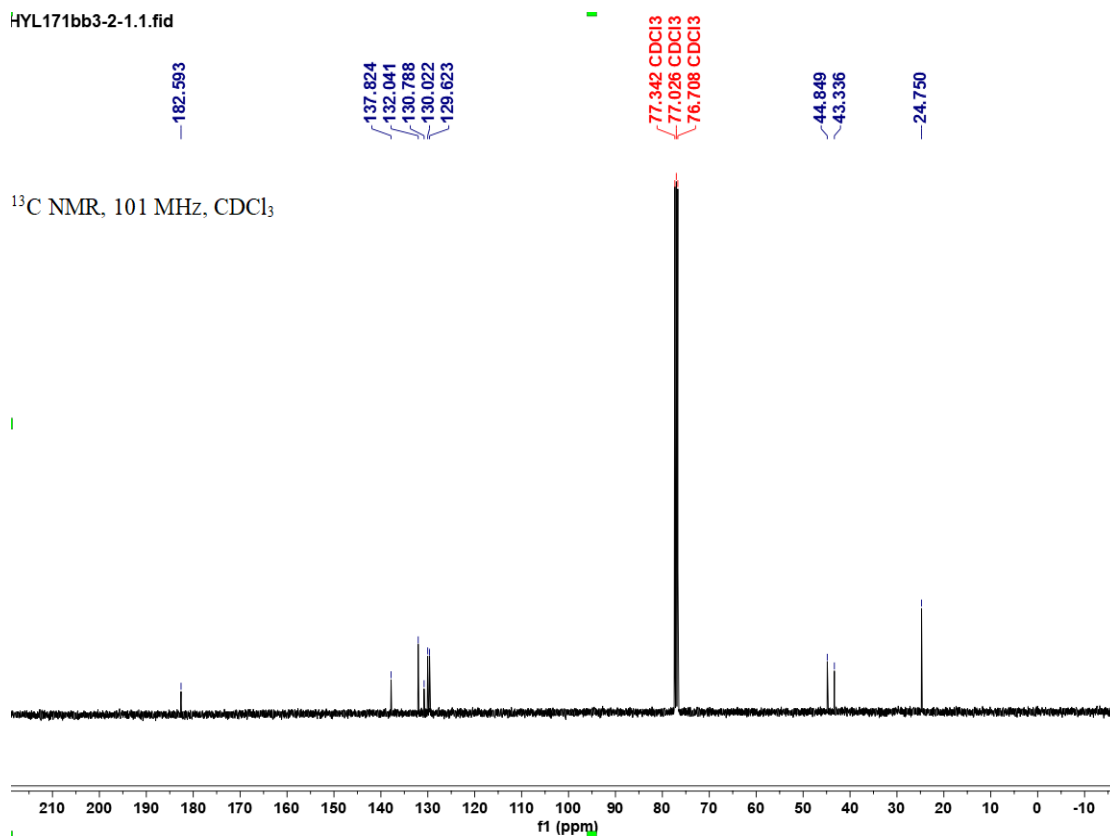

<sup>1</sup>H NMR (400 MHz) and <sup>13</sup>C NMR (101 MHz) spectra of **7-22**

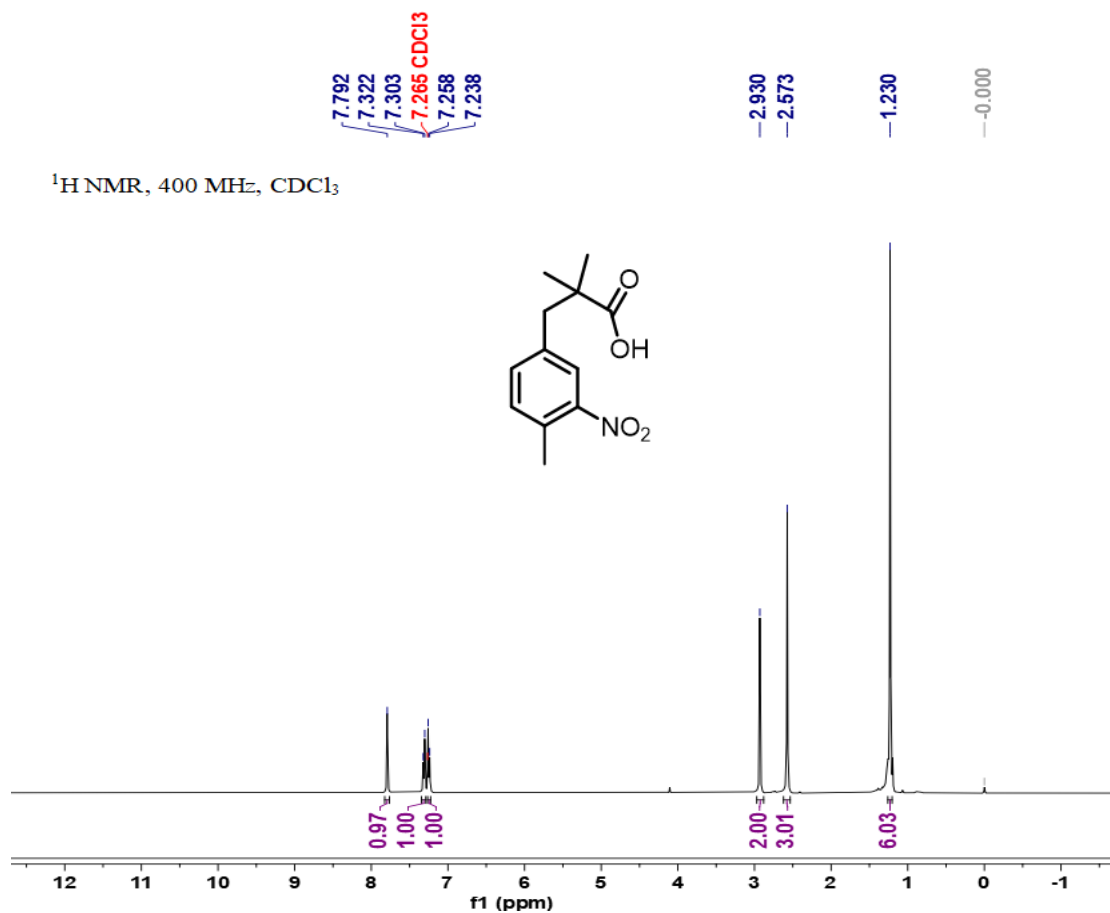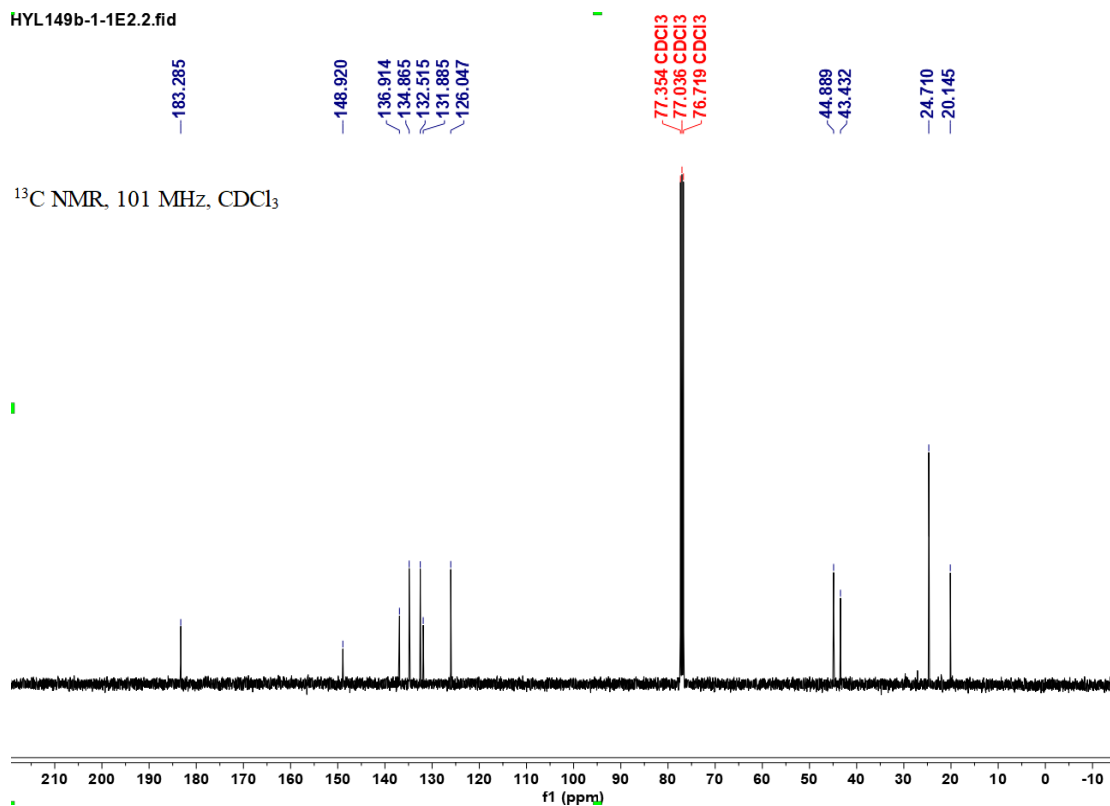

<sup>1</sup>H NMR (400 MHz) and <sup>13</sup>C NMR (101 MHz) spectra of 7-23

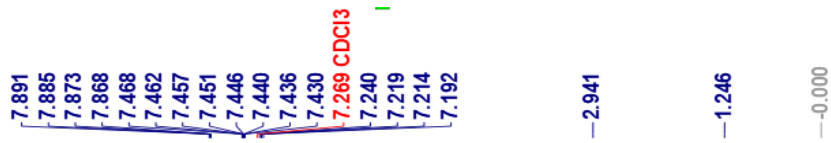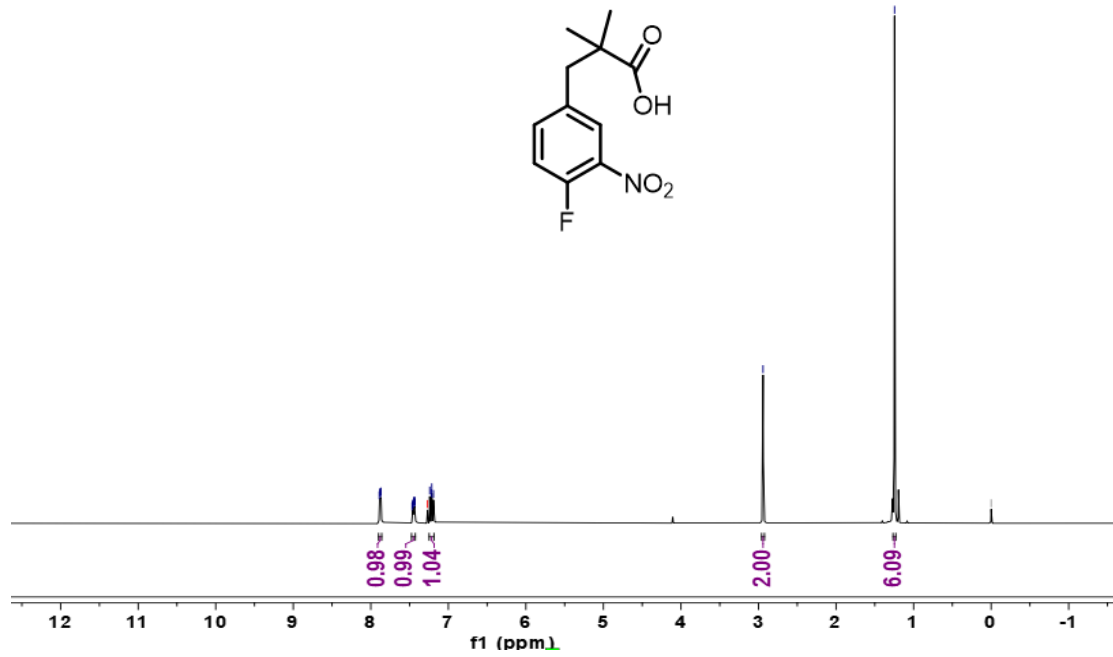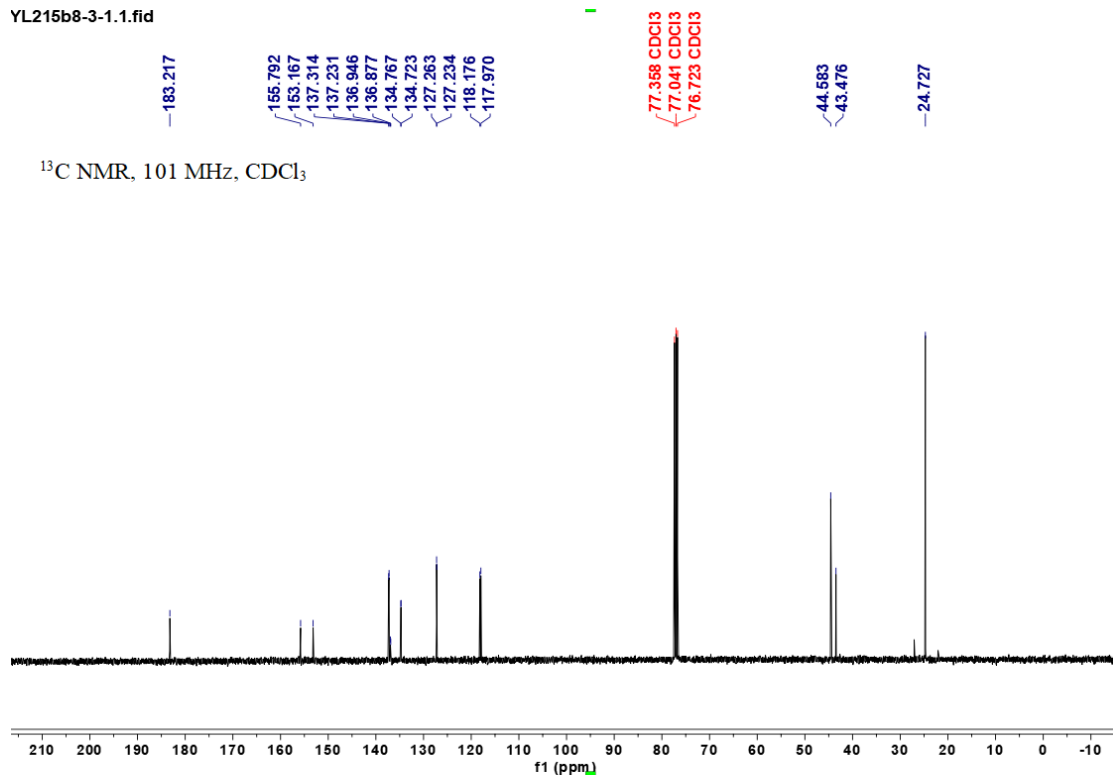

YL215b8-3.2.fid

$^{19}\text{F}$  NMR, 376 MHz,  $\text{CDCl}_3$

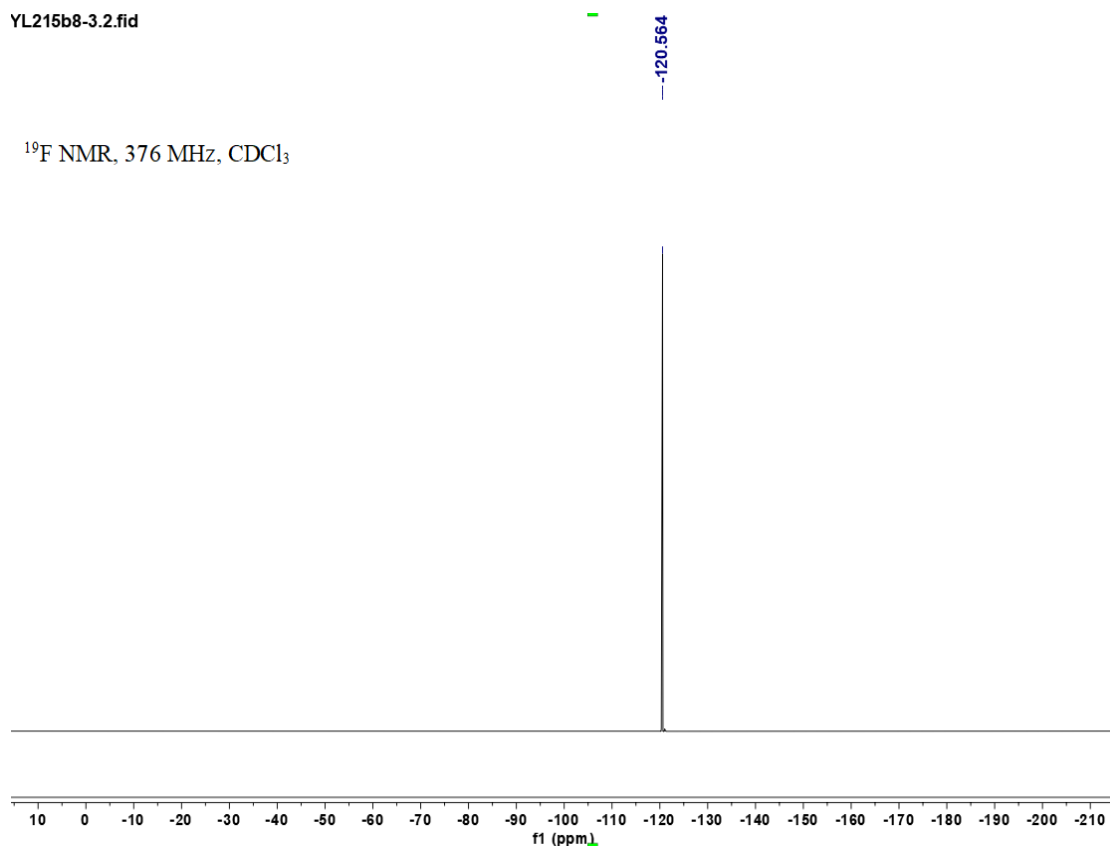

$^1\text{H}$  NMR (400 MHz),  $^{13}\text{C}$  NMR (101 MHz) and  $^{19}\text{F}$  NMR (376 MHz) spectra of **7-24**



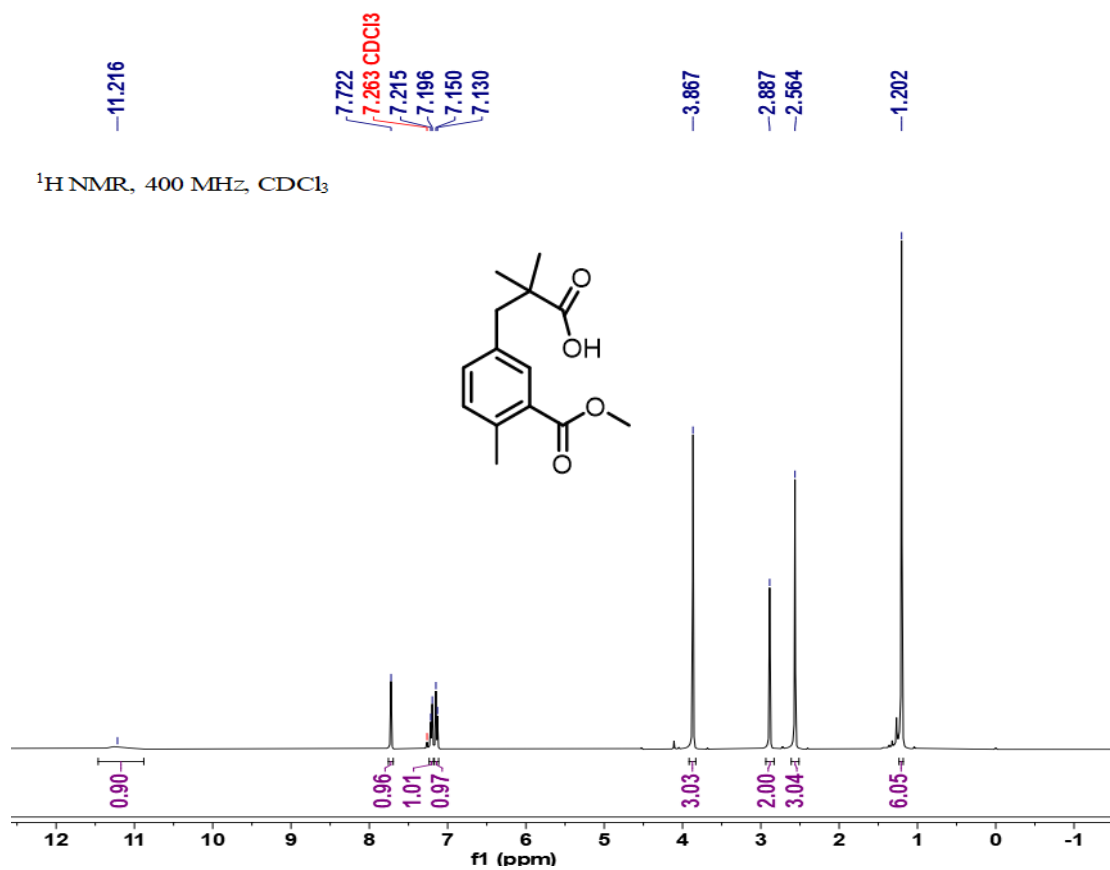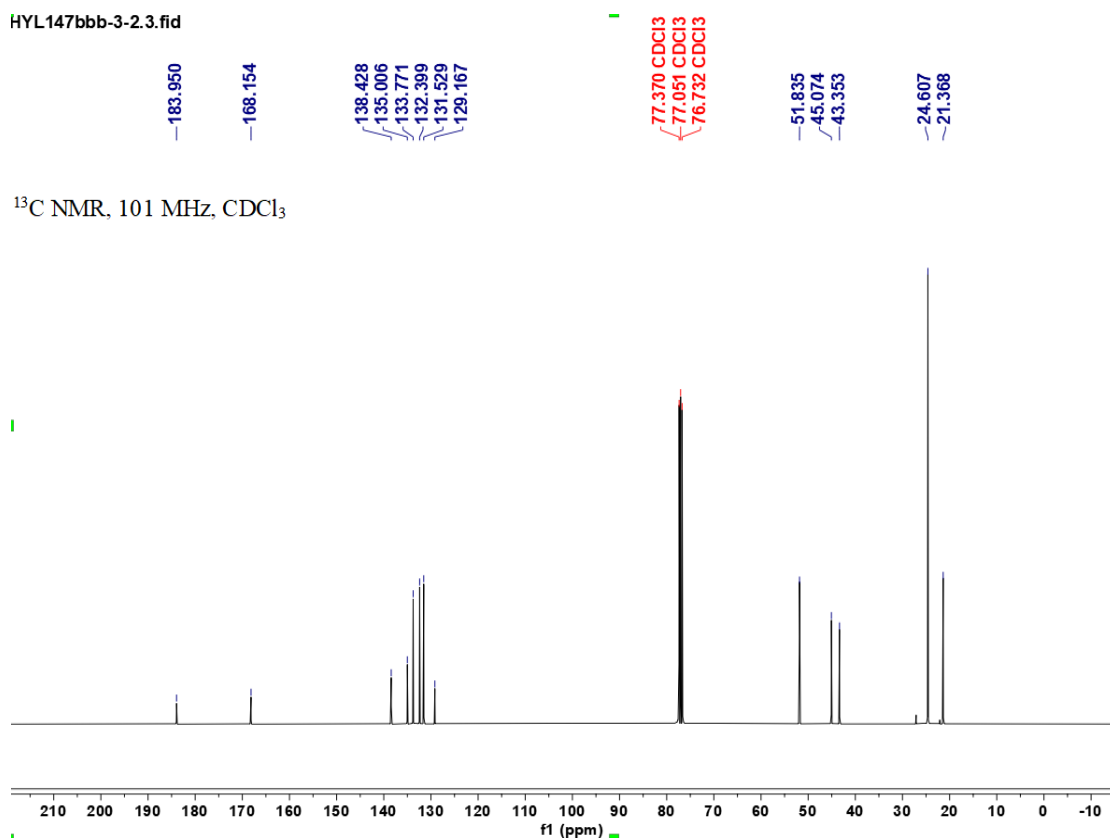

<sup>1</sup>H NMR (400 MHz) and <sup>13</sup>C NMR (101 MHz) spectra of 7-25

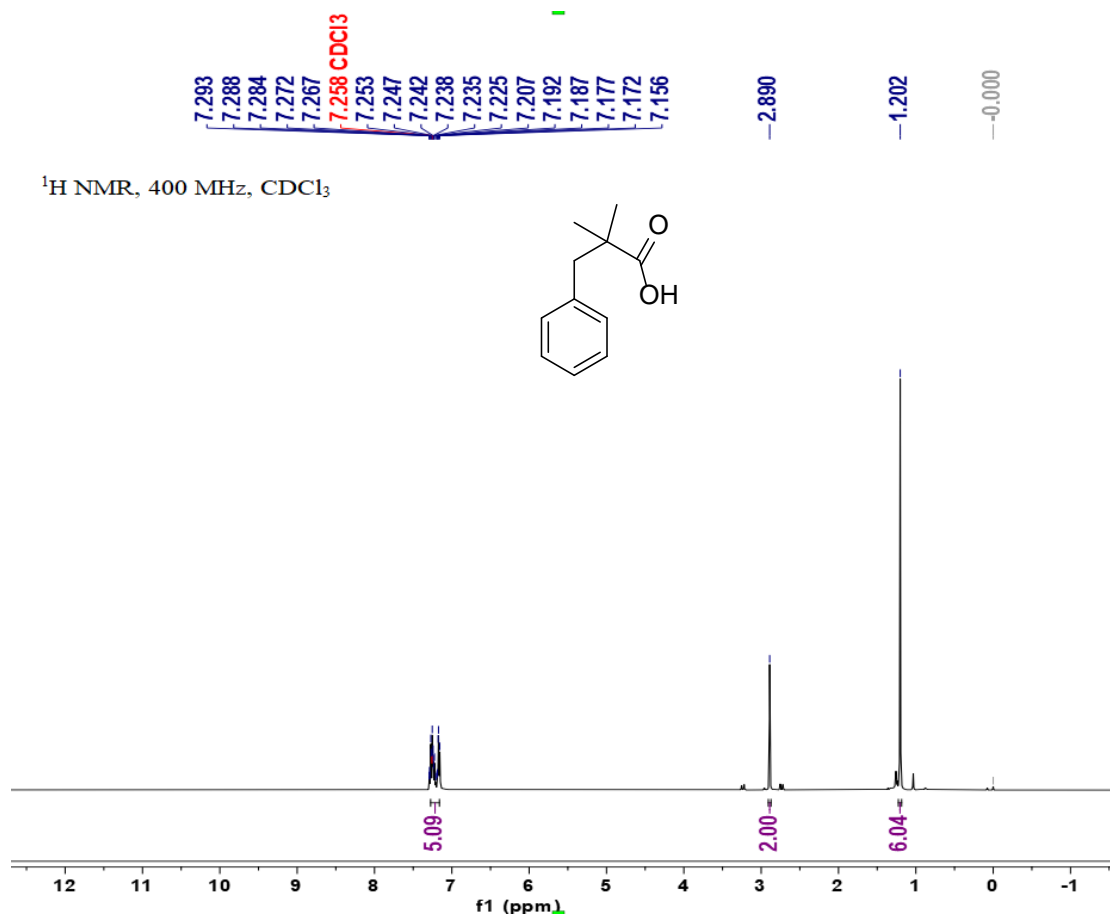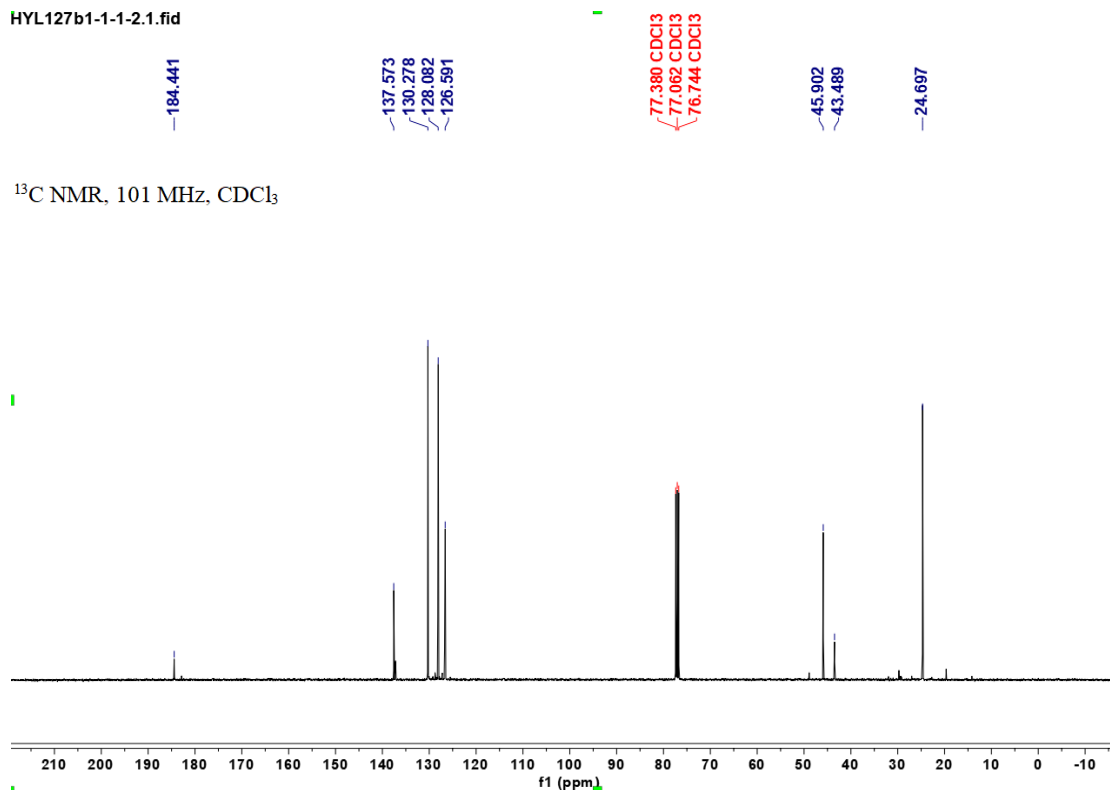

<sup>1</sup>H NMR (400 MHz) and <sup>13</sup>C NMR (101 MHz) spectra of **7-26**

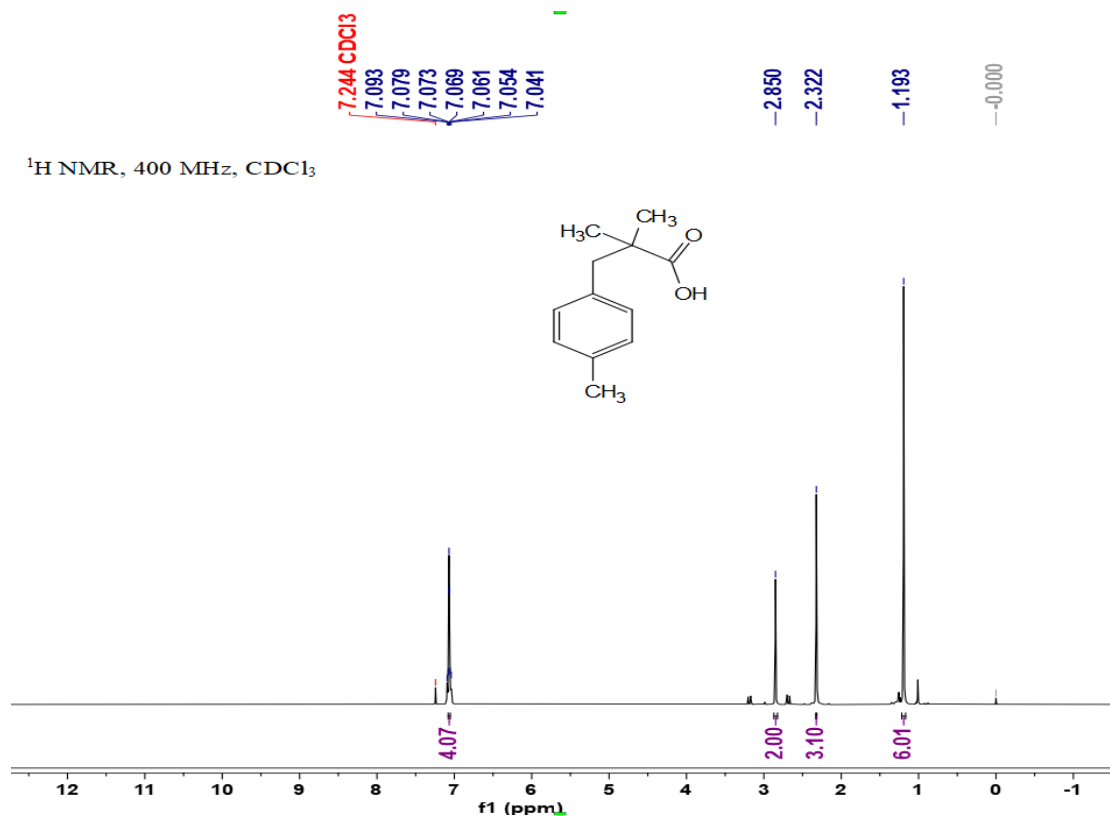

HYL127BB-(2)-1.fid

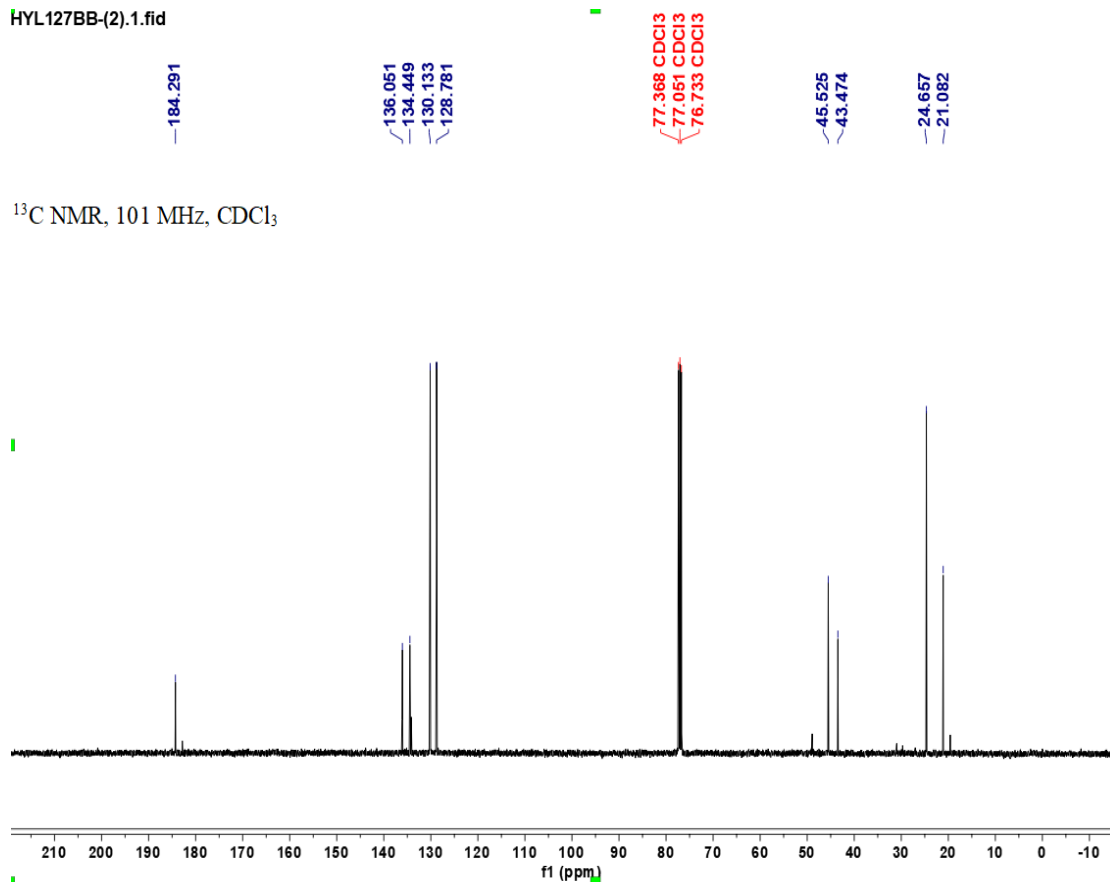

<sup>1</sup>H NMR (400 MHz) and <sup>13</sup>C NMR (101 MHz) spectra of **7-27**

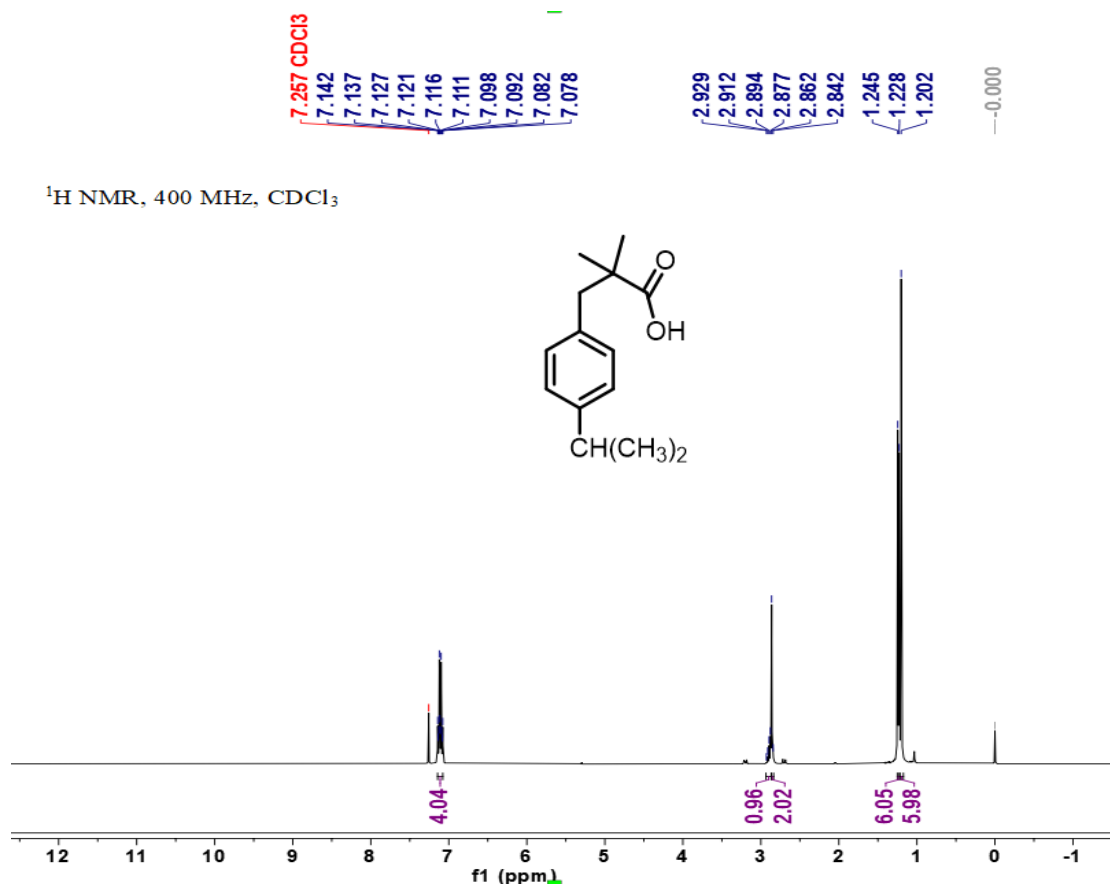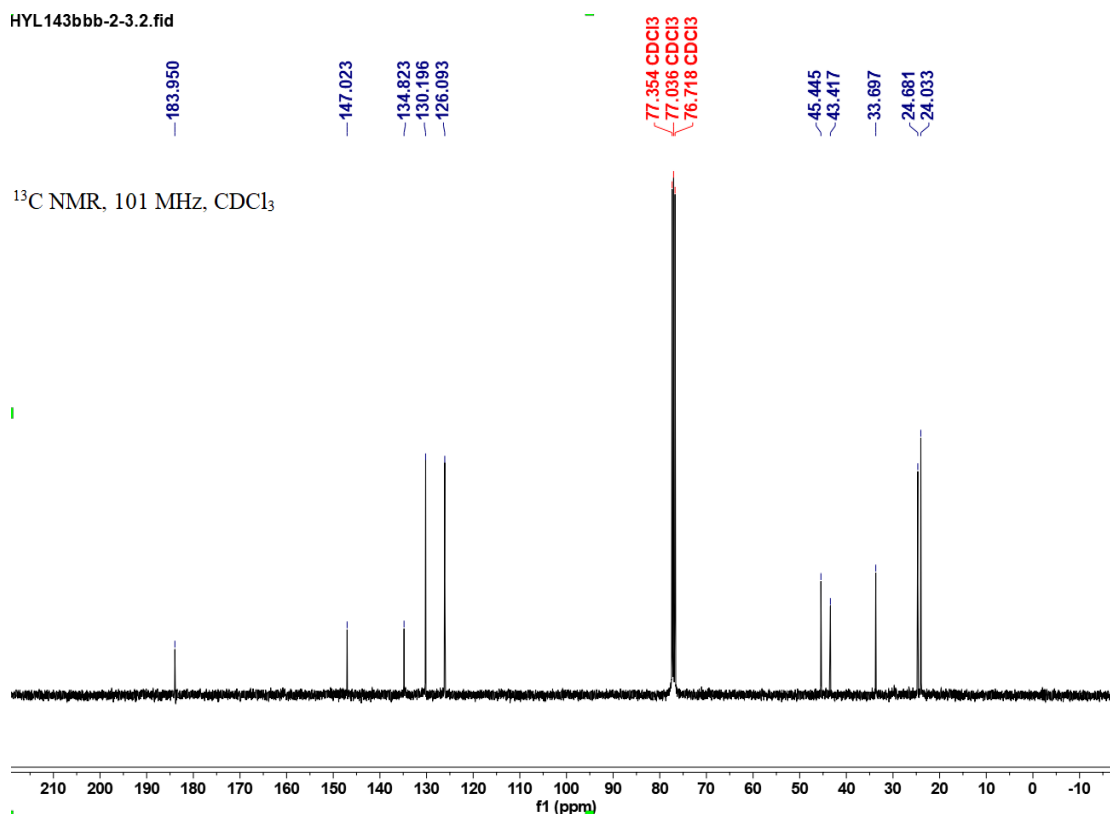

<sup>1</sup>H NMR (400 MHz) and <sup>13</sup>C NMR (101 MHz) spectra of 7-28

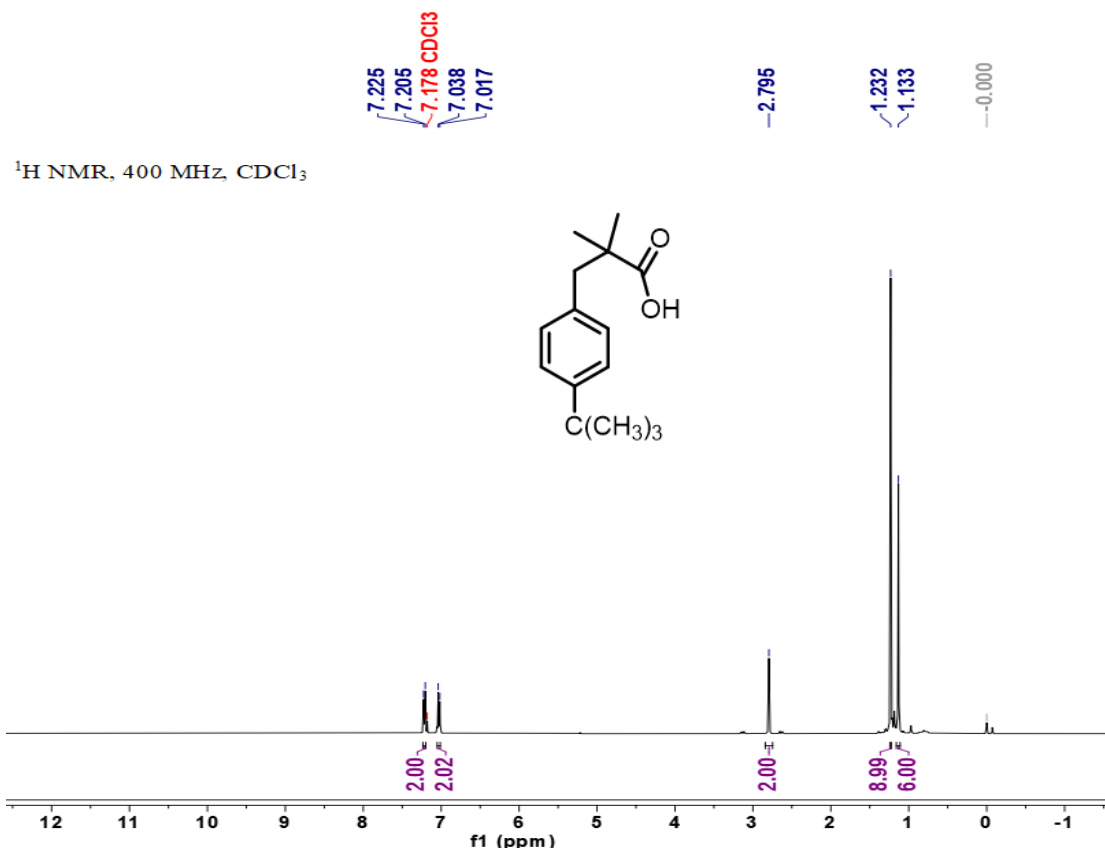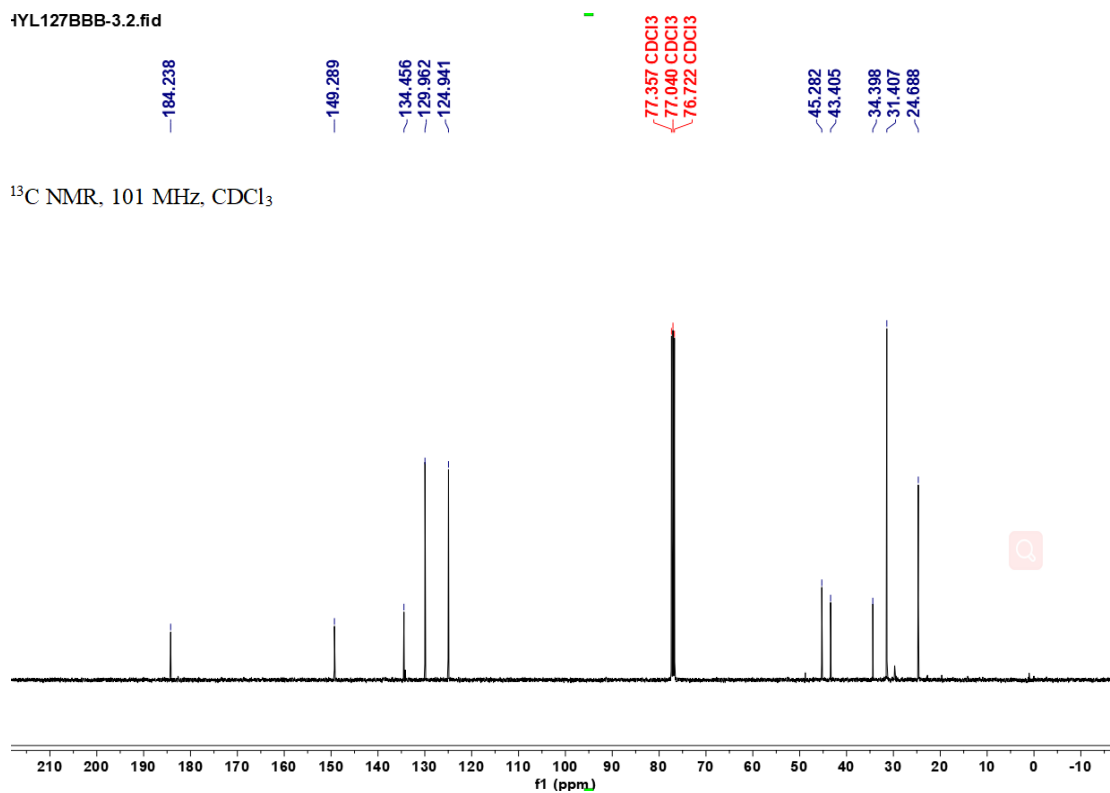

<sup>1</sup>H NMR (400 MHz) and <sup>13</sup>C NMR (101 MHz) spectra of **7-29**

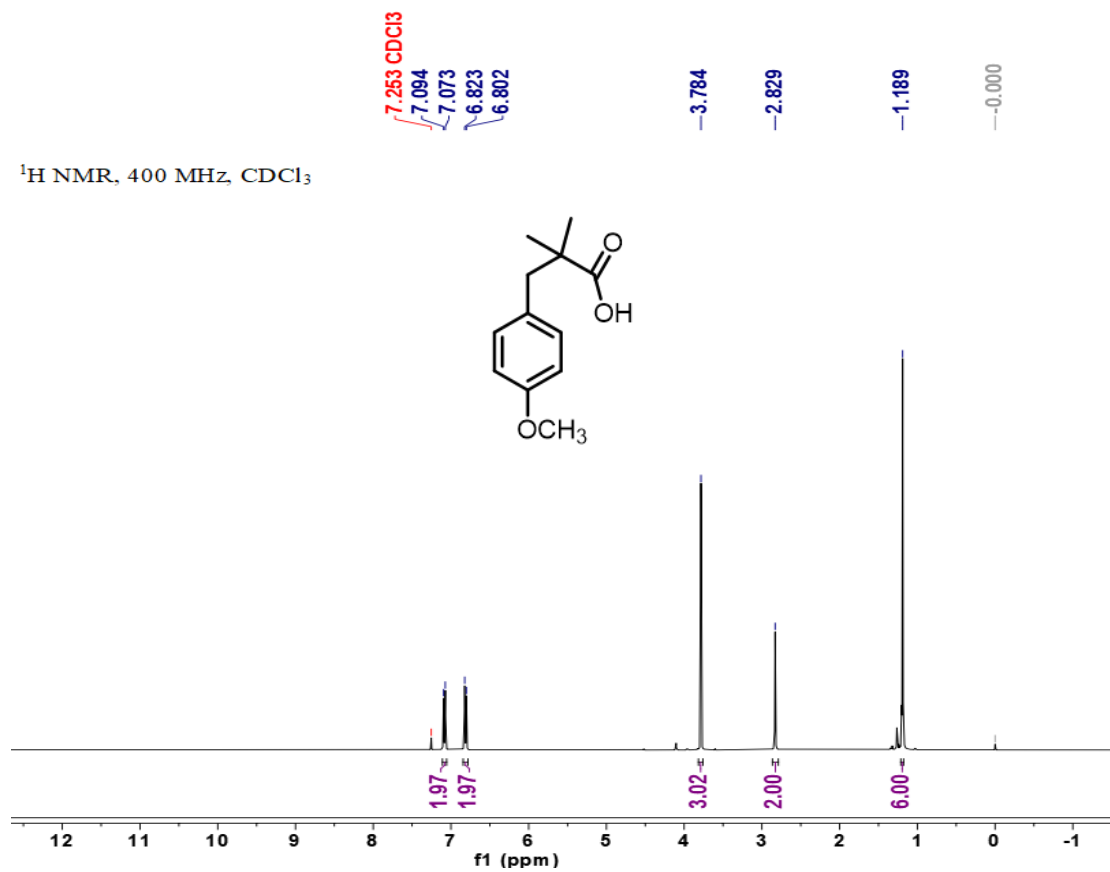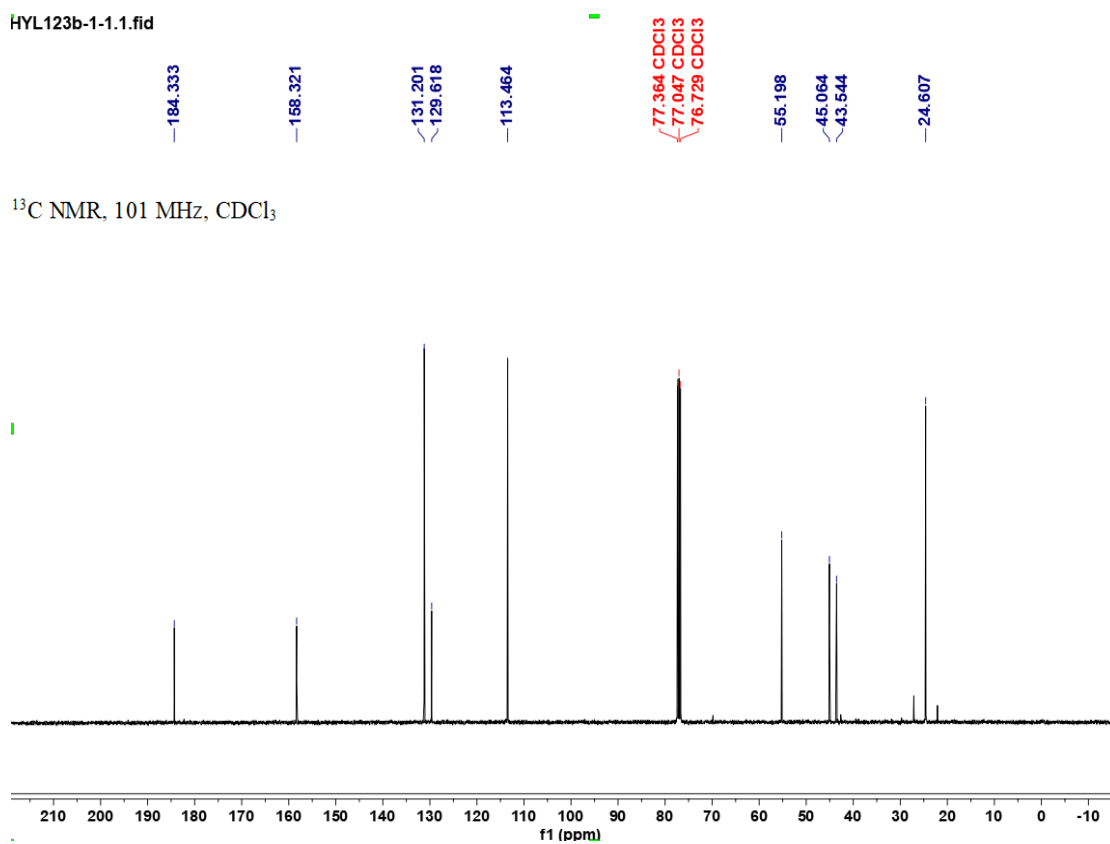

<sup>1</sup>H NMR (400 MHz) and <sup>13</sup>C NMR (101 MHz) spectra of **7-30**

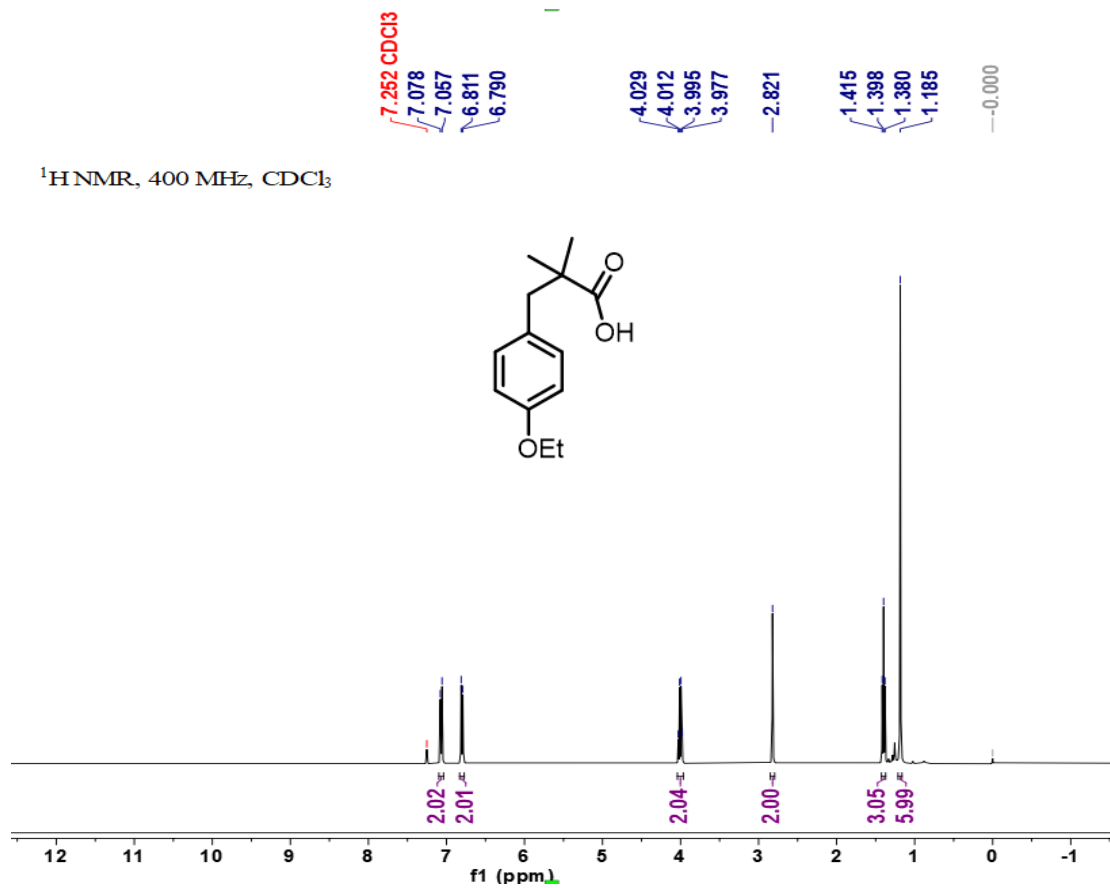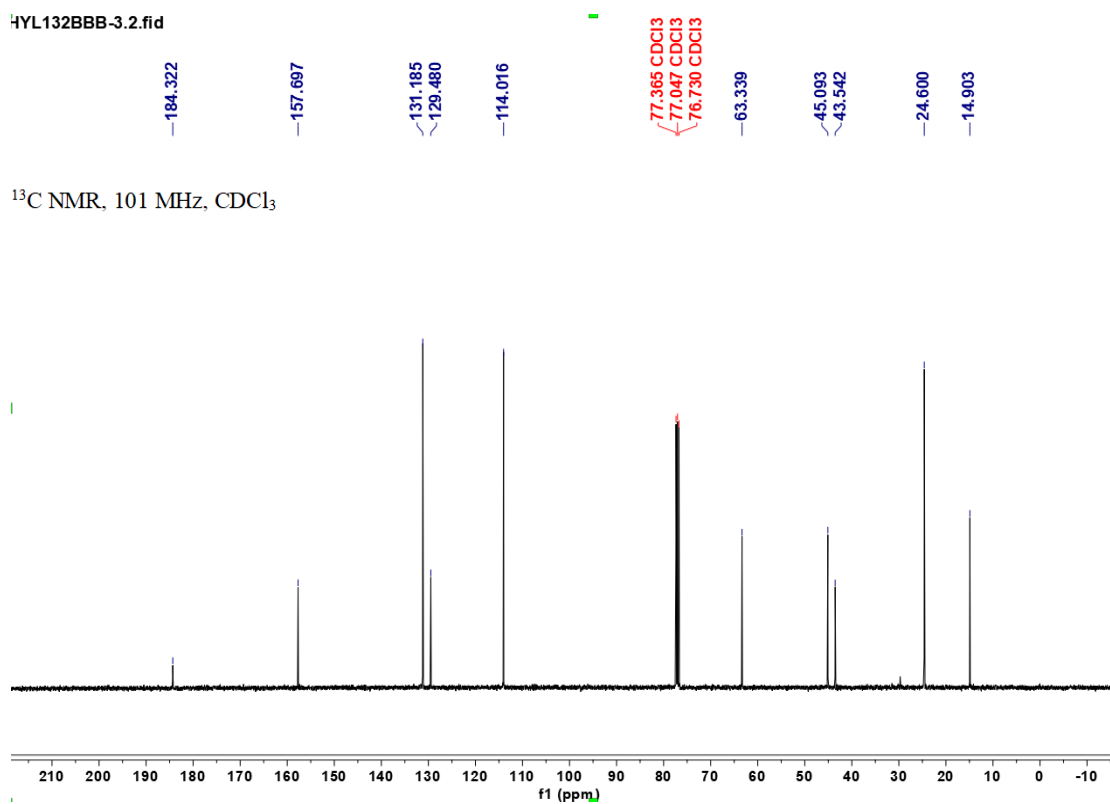

<sup>1</sup>H NMR (400 MHz) and <sup>13</sup>C NMR (101 MHz) spectra of **7-31**

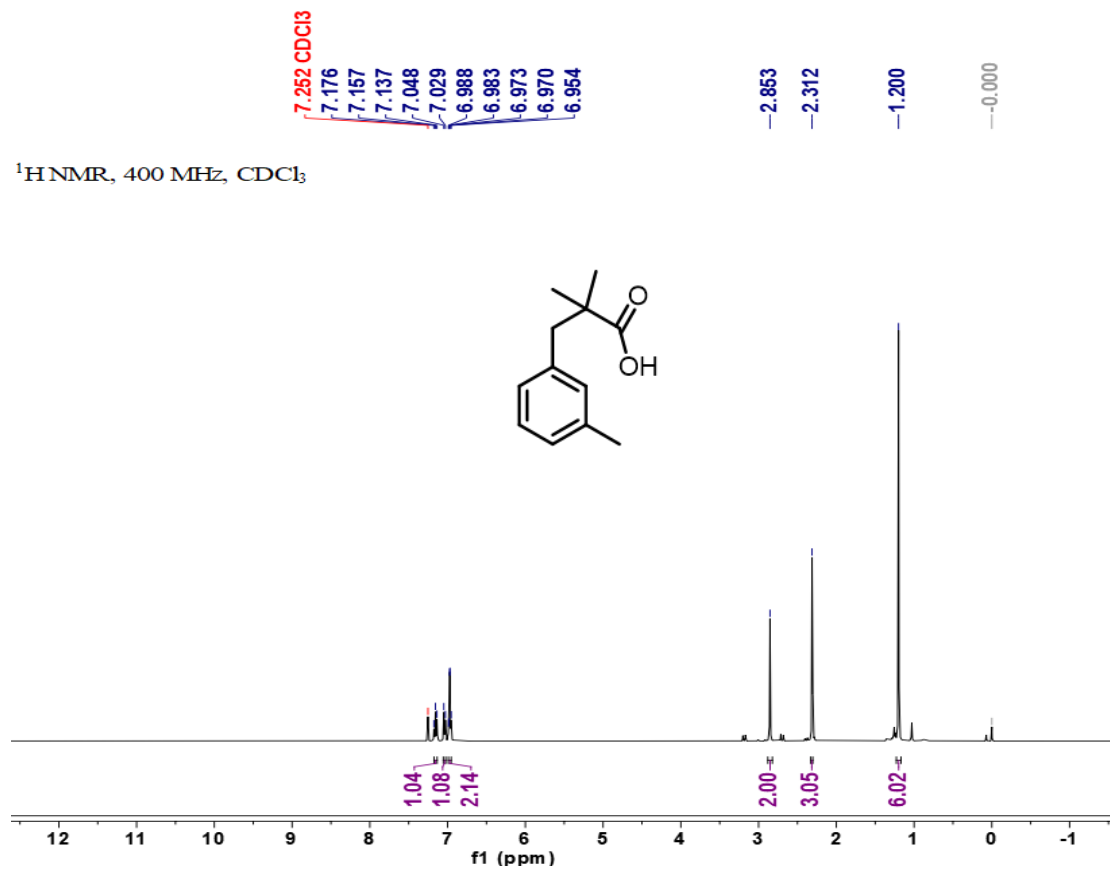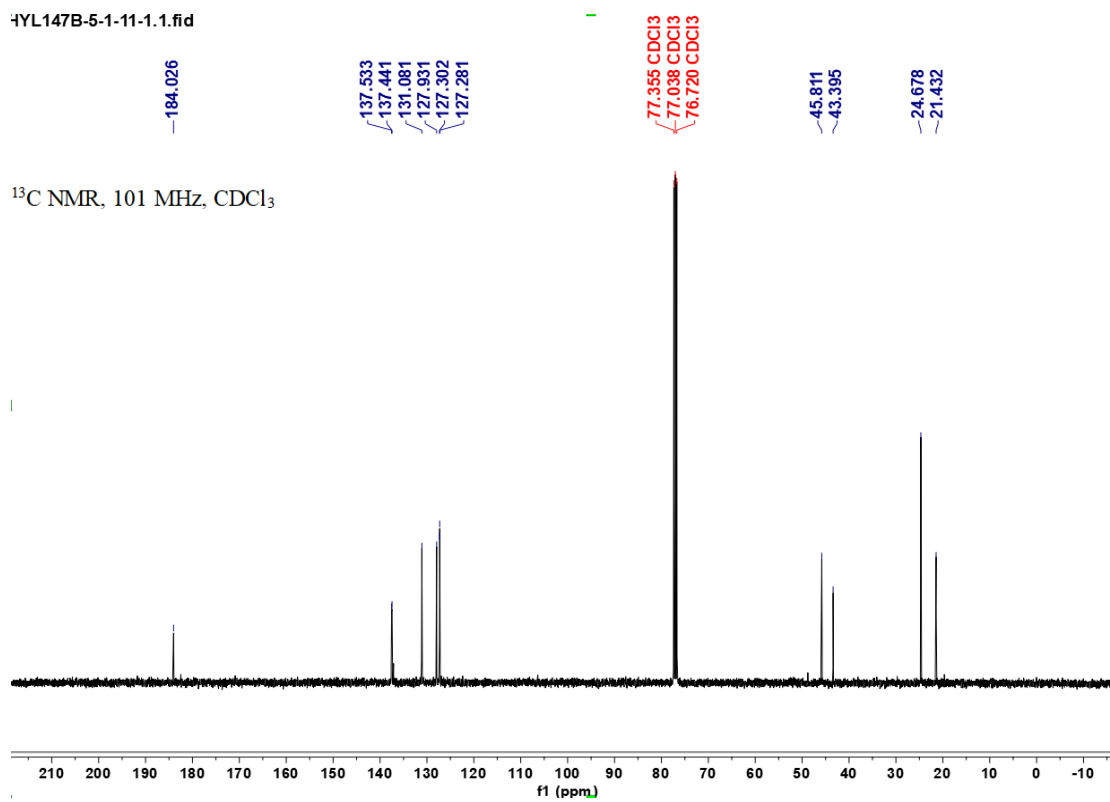

<sup>1</sup>H NMR (400 MHz) and <sup>13</sup>C NMR (101 MHz) spectra of **7-32**



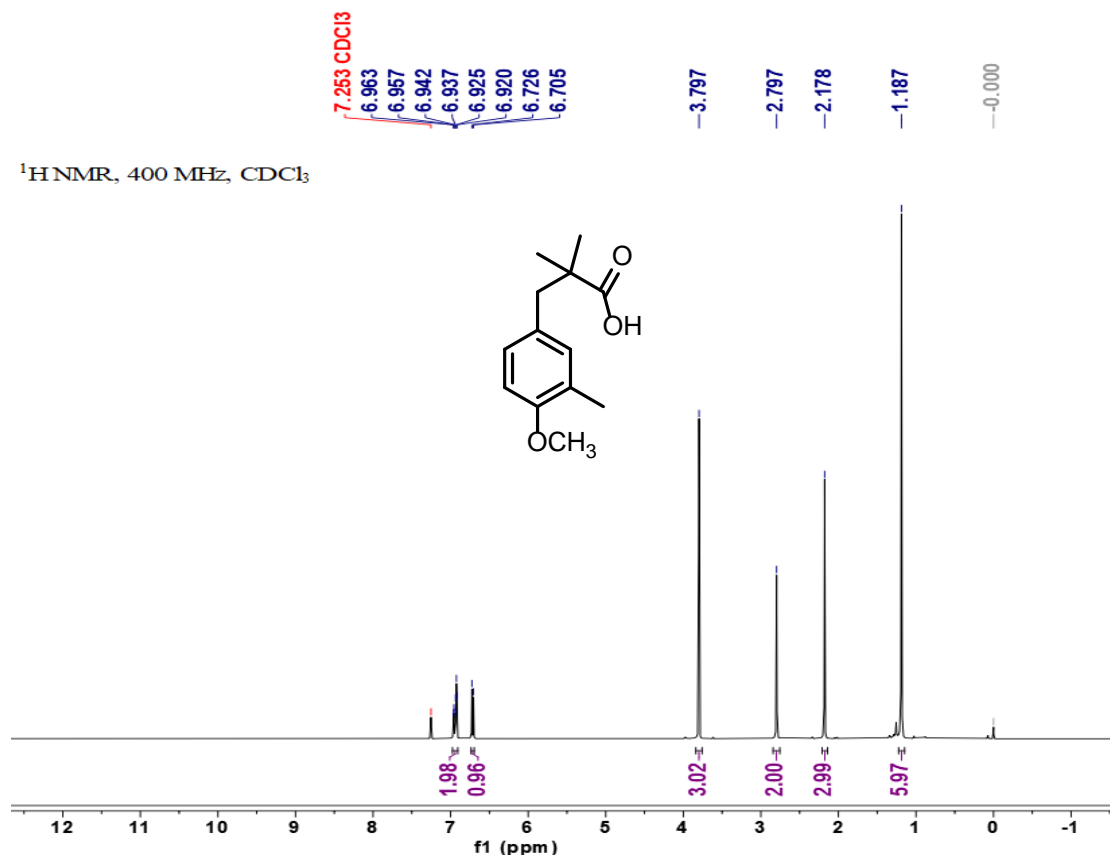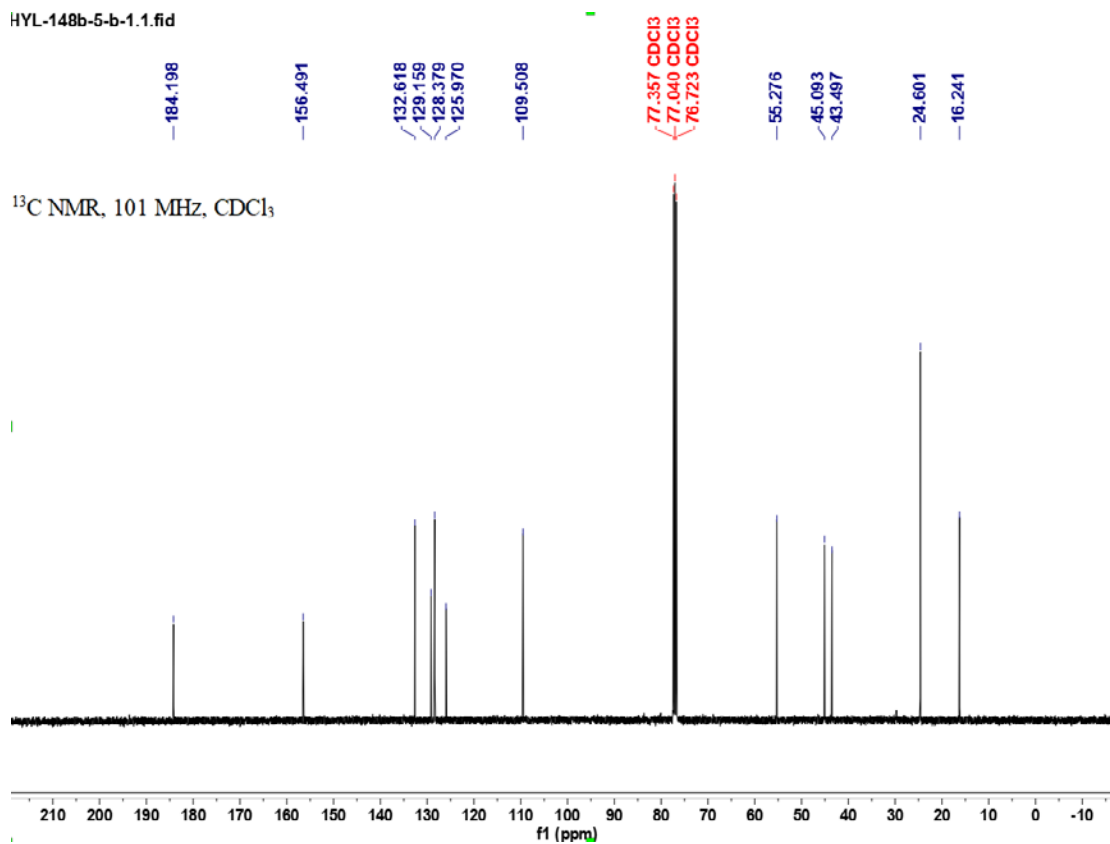

<sup>1</sup>H NMR (400 MHz) and <sup>13</sup>C NMR (101 MHz) spectra of 7-33

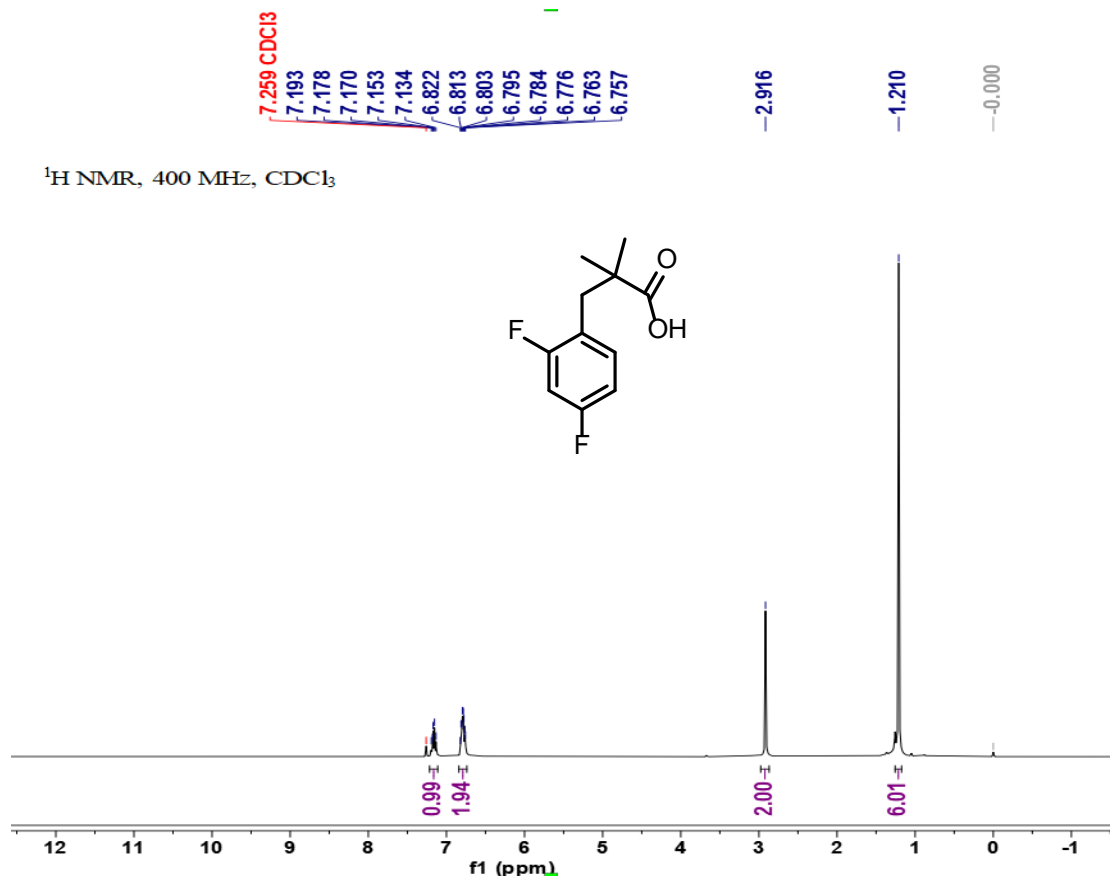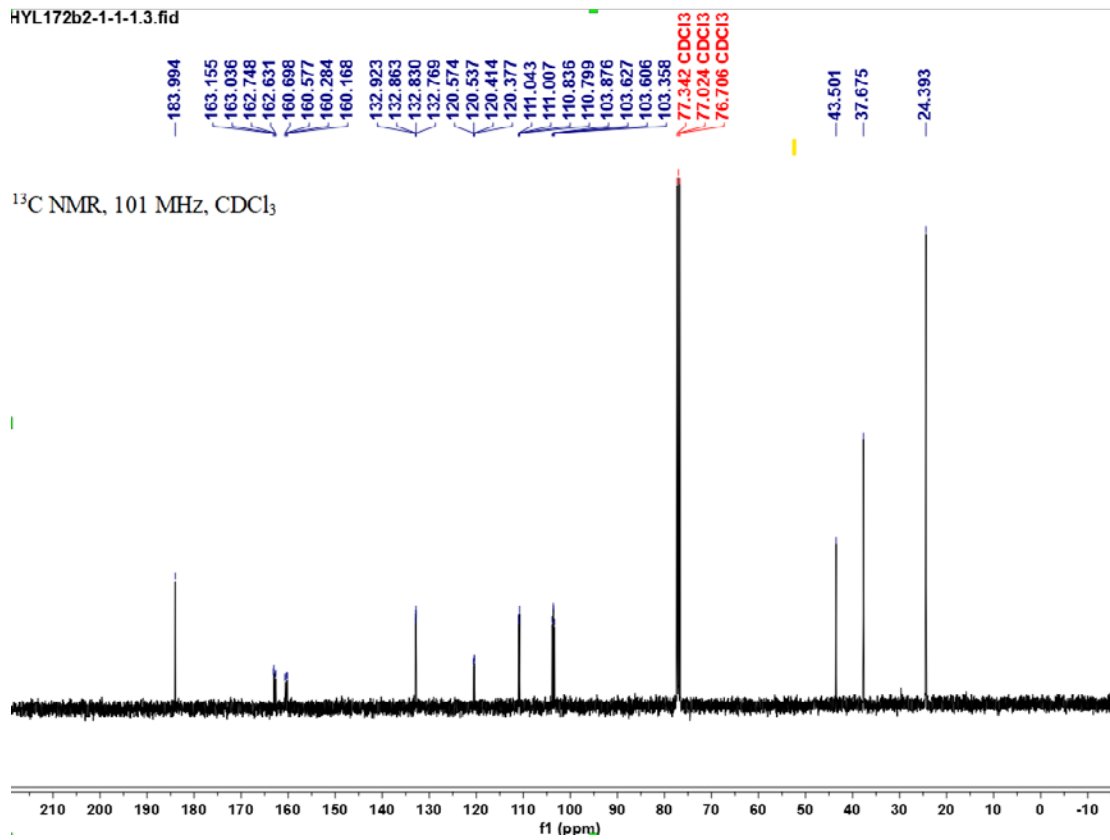

HYL172b2-1-1-1.2.fid

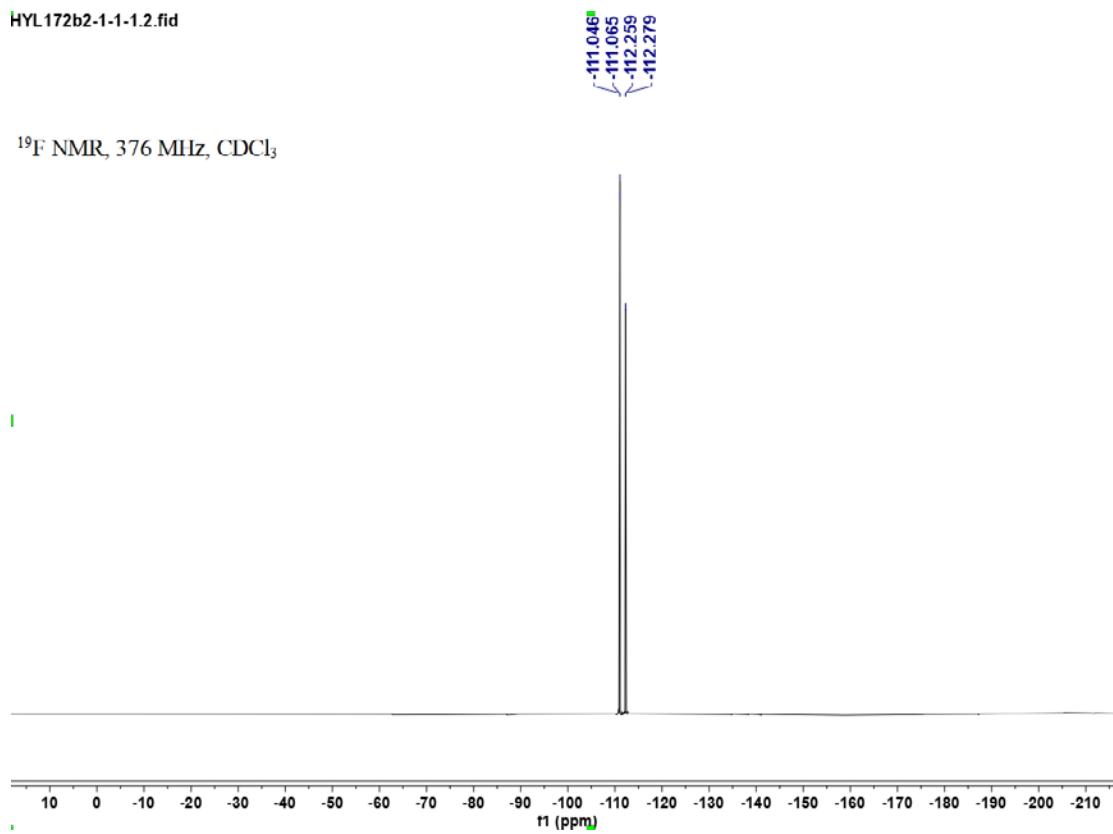

$^1\text{H}$  NMR (400 MHz),  $^{13}\text{C}$  NMR (101 MHz) and  $^{19}\text{F}$  NMR (376 MHz) spectra of **7-34**

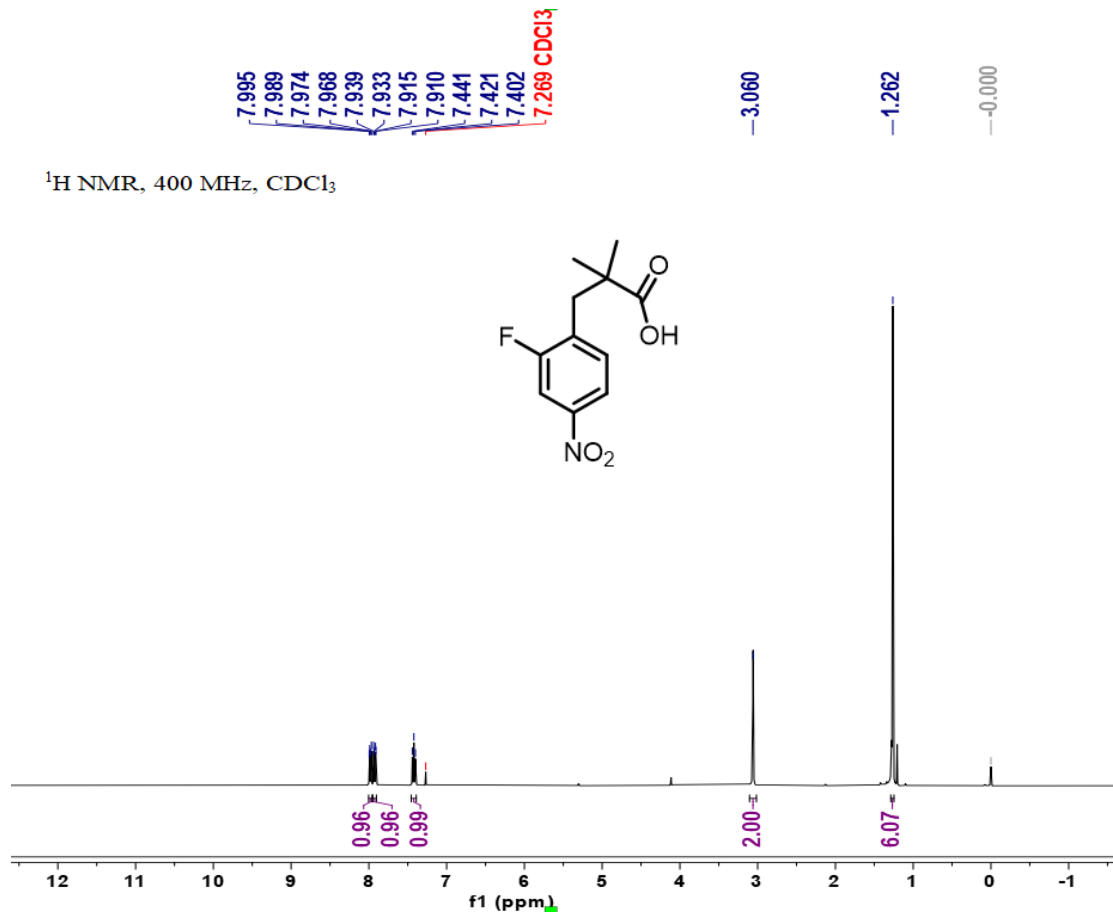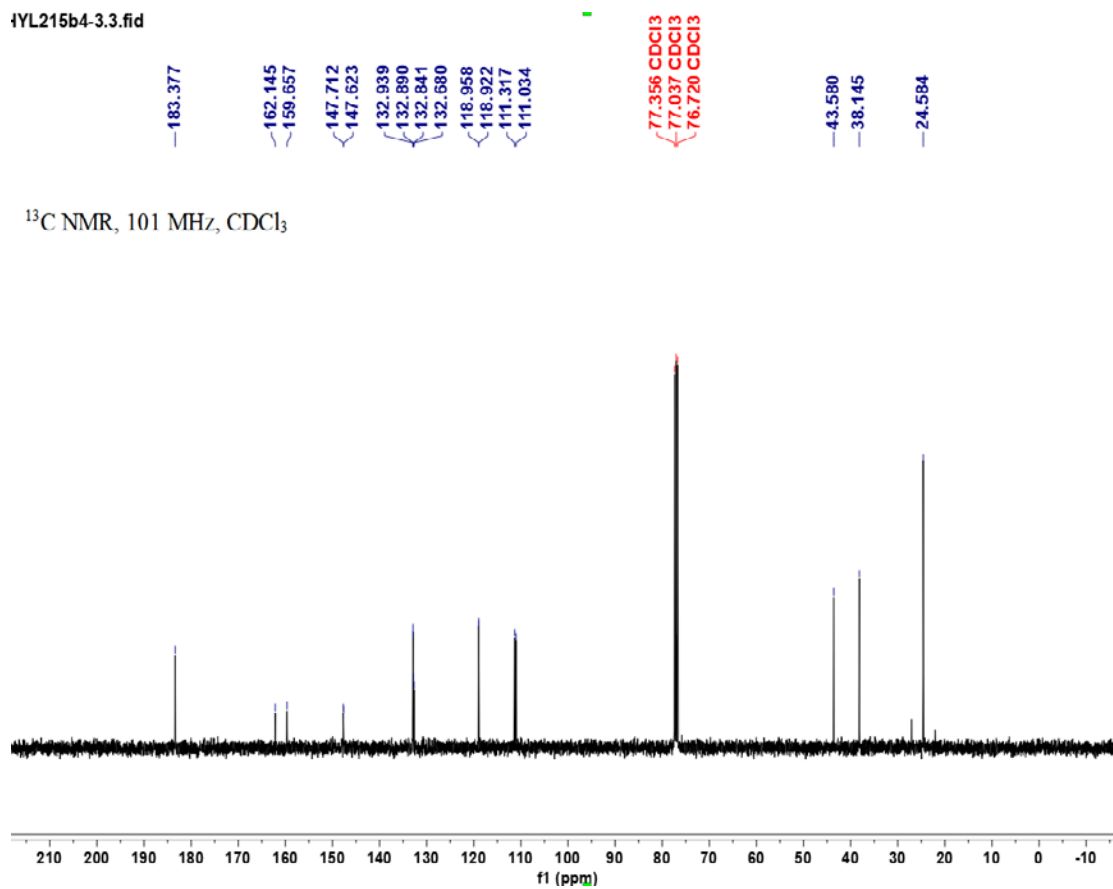

YL215b4-3.2.fid

$^{19}\text{F}$  NMR, 376 MHz,  $\text{CDCl}_3$

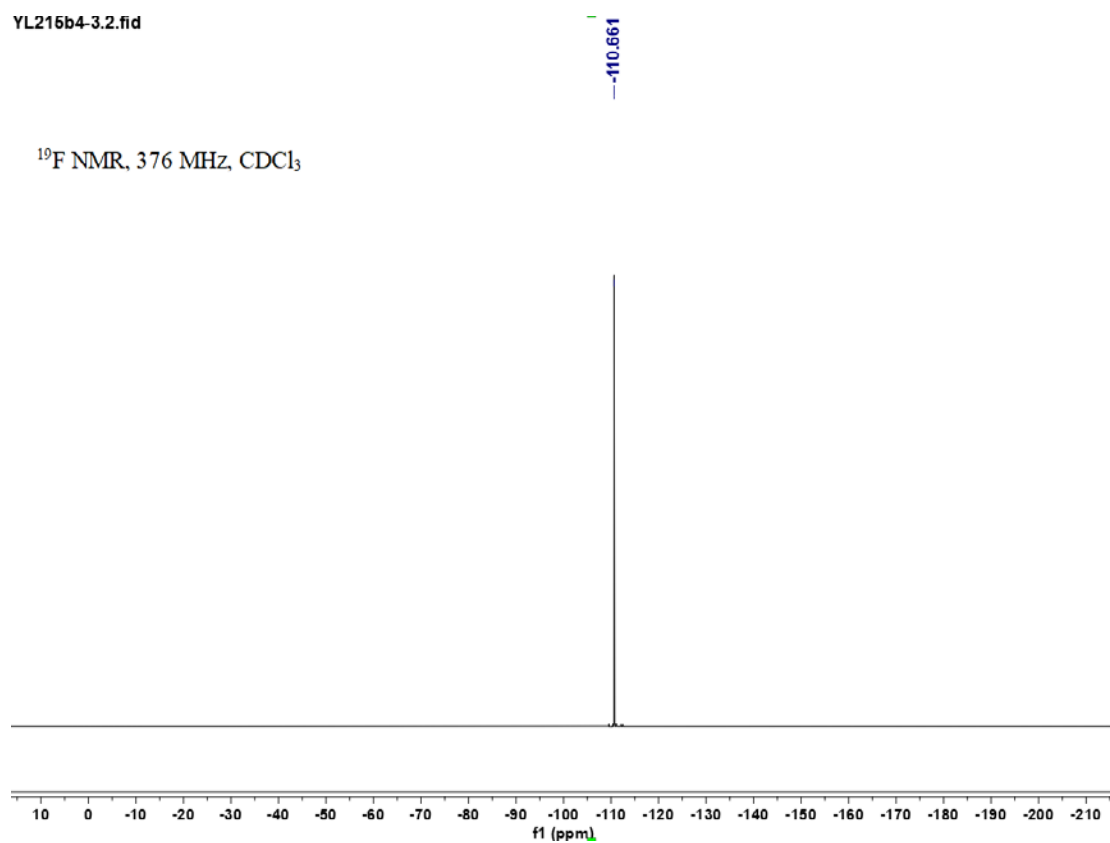

$^1\text{H}$  NMR (400 MHz),  $^{13}\text{C}$  NMR (101 MHz) and  $^{19}\text{F}$  NMR (376 MHz) spectra of **7-35**

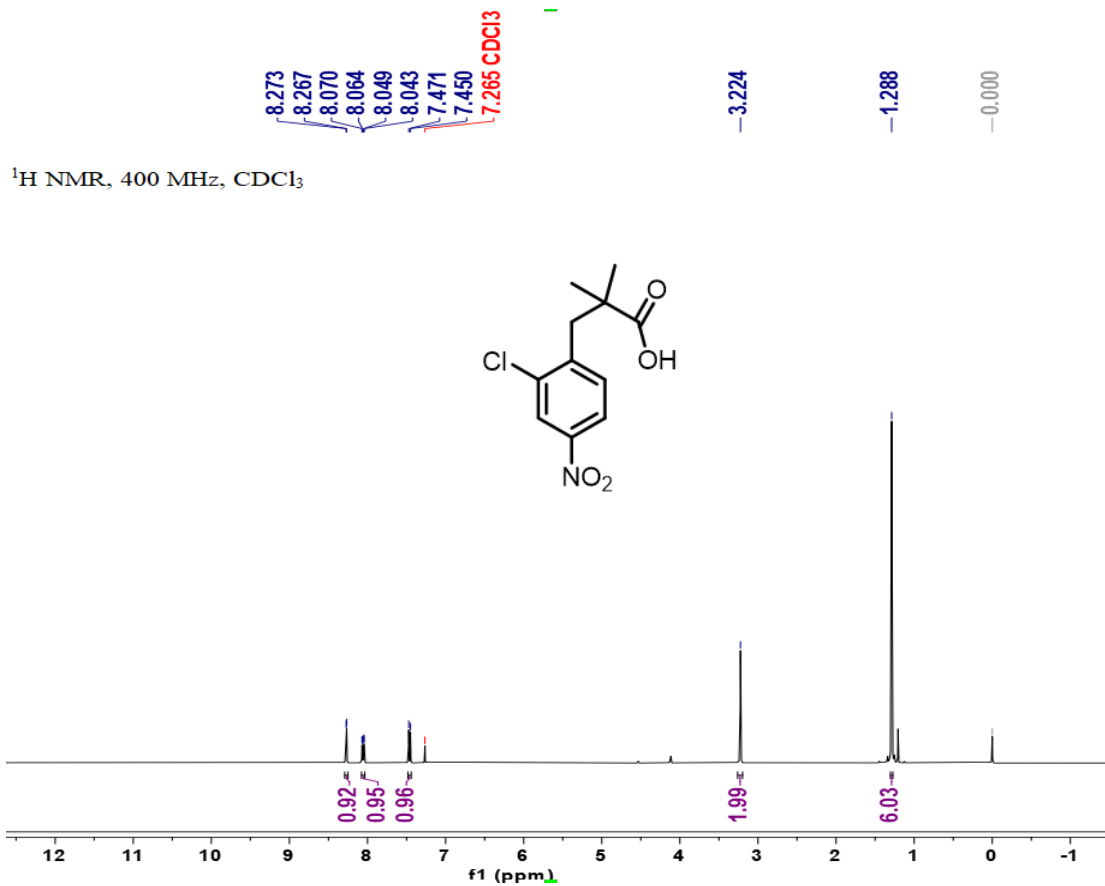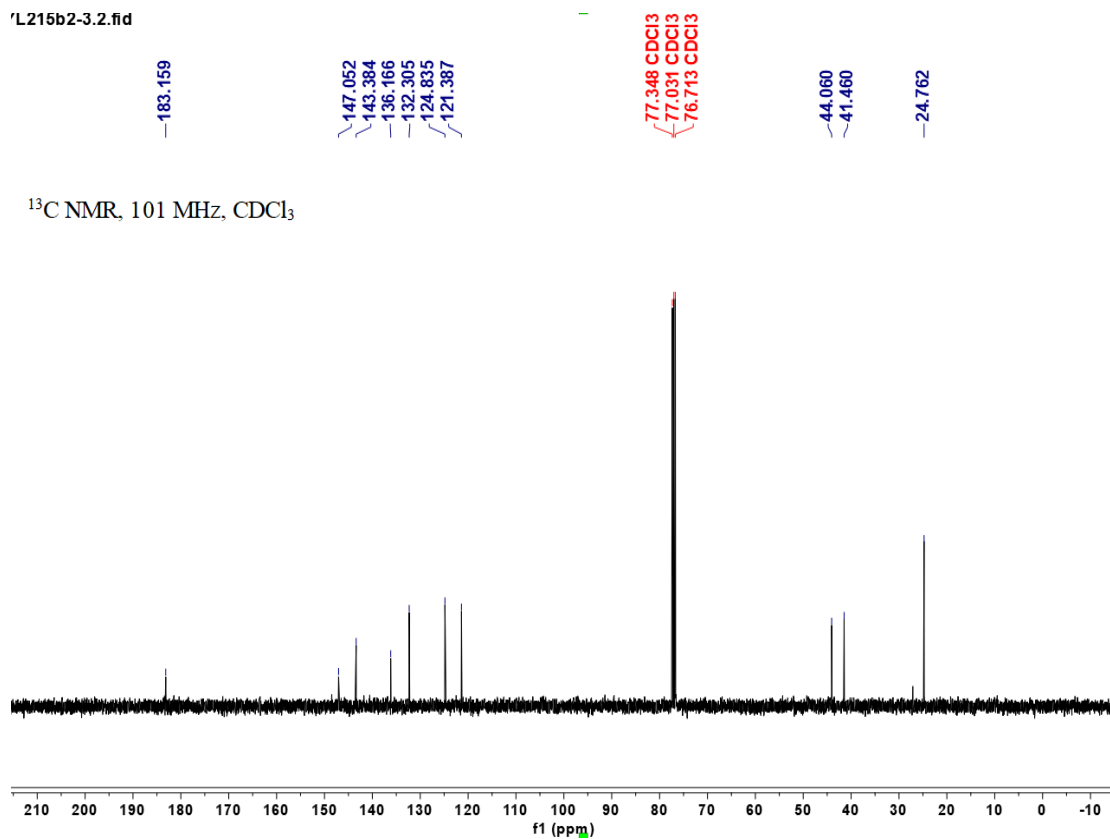

<sup>1</sup>H NMR (400 MHz) and <sup>13</sup>C NMR (101 MHz) spectra of **7-36**

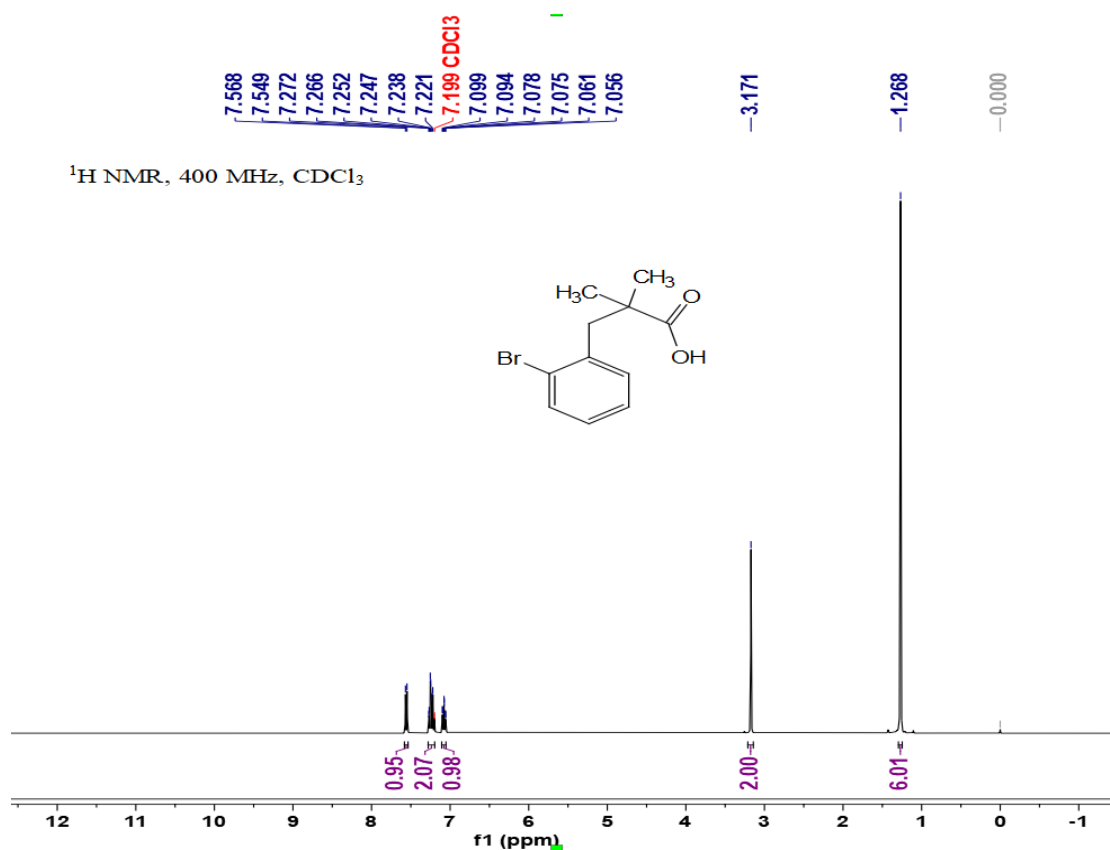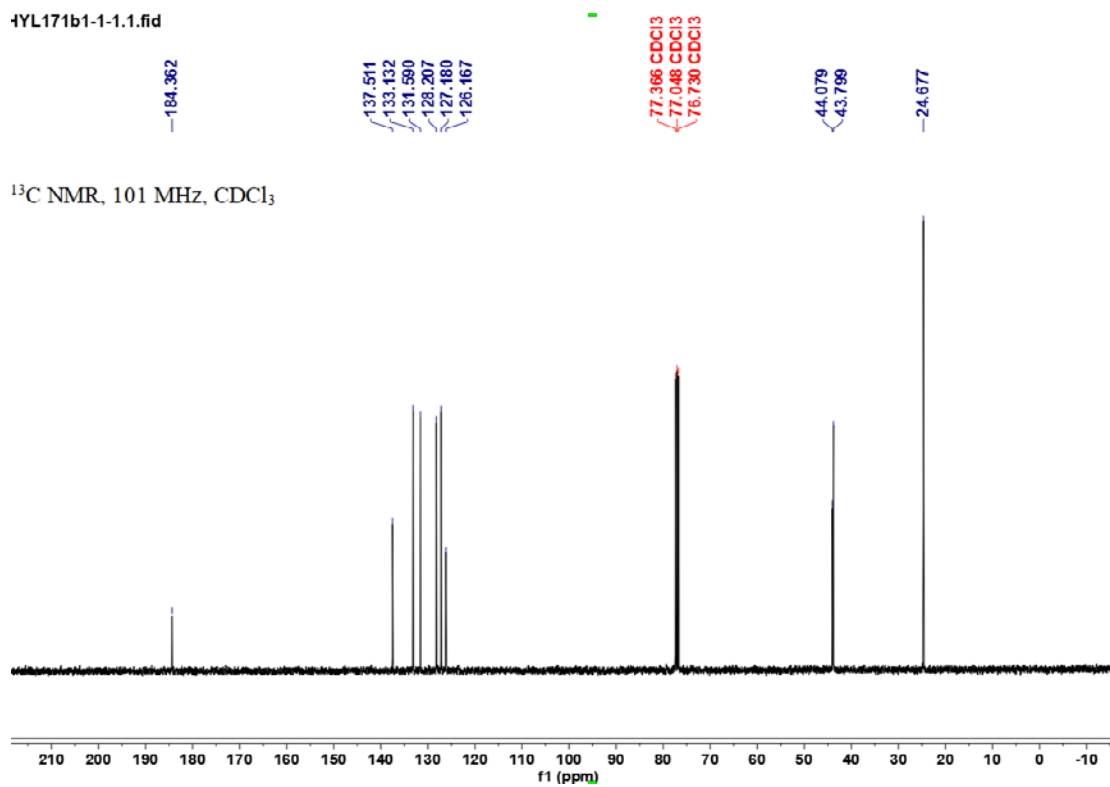

<sup>1</sup>H NMR (400 MHz) and <sup>13</sup>C NMR (101 MHz) spectra of **7-37**

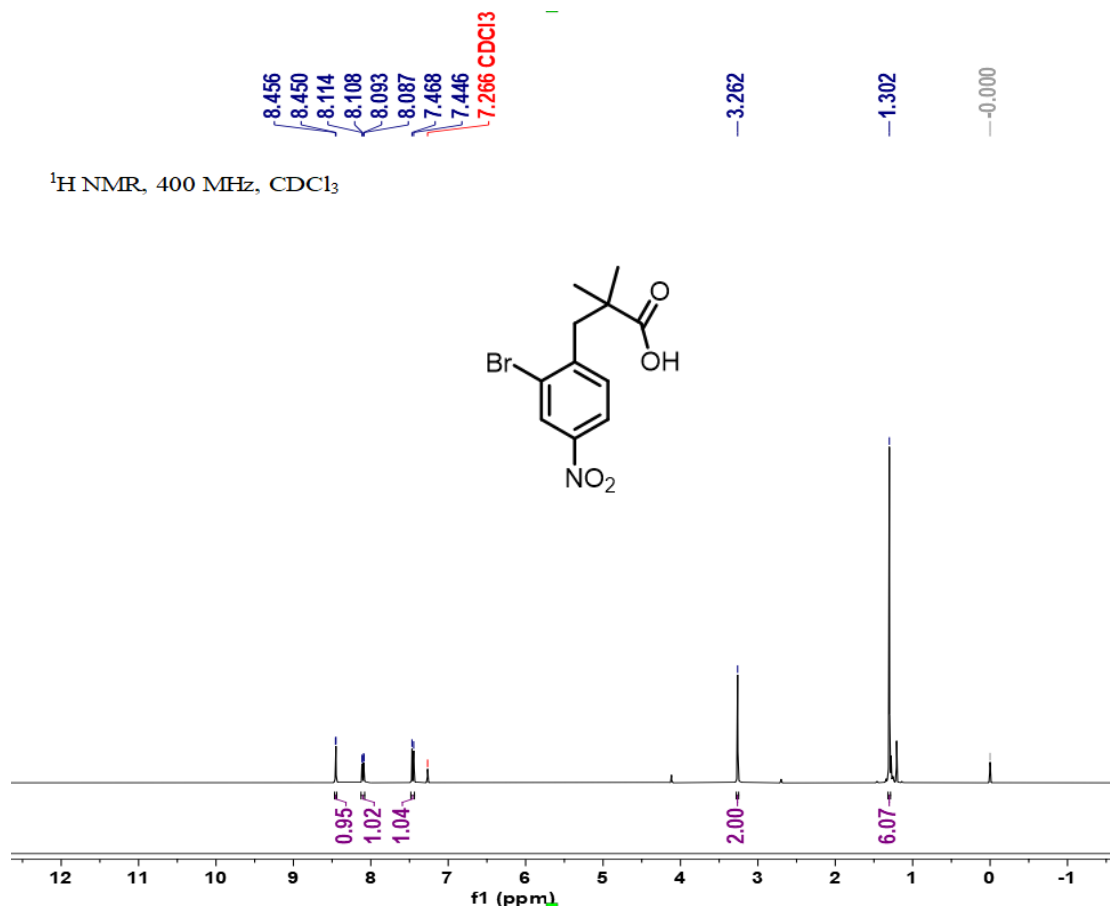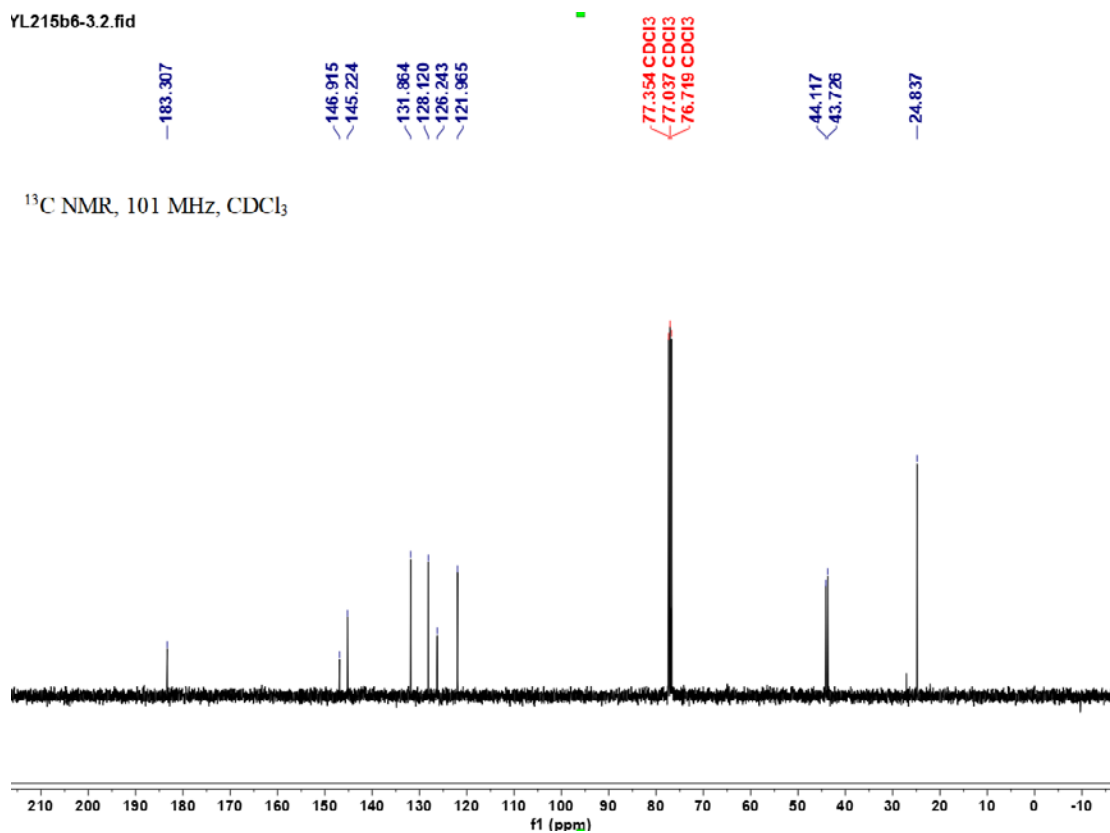

<sup>1</sup>H NMR (400 MHz) and <sup>13</sup>C NMR (101 MHz) spectra of 7-38



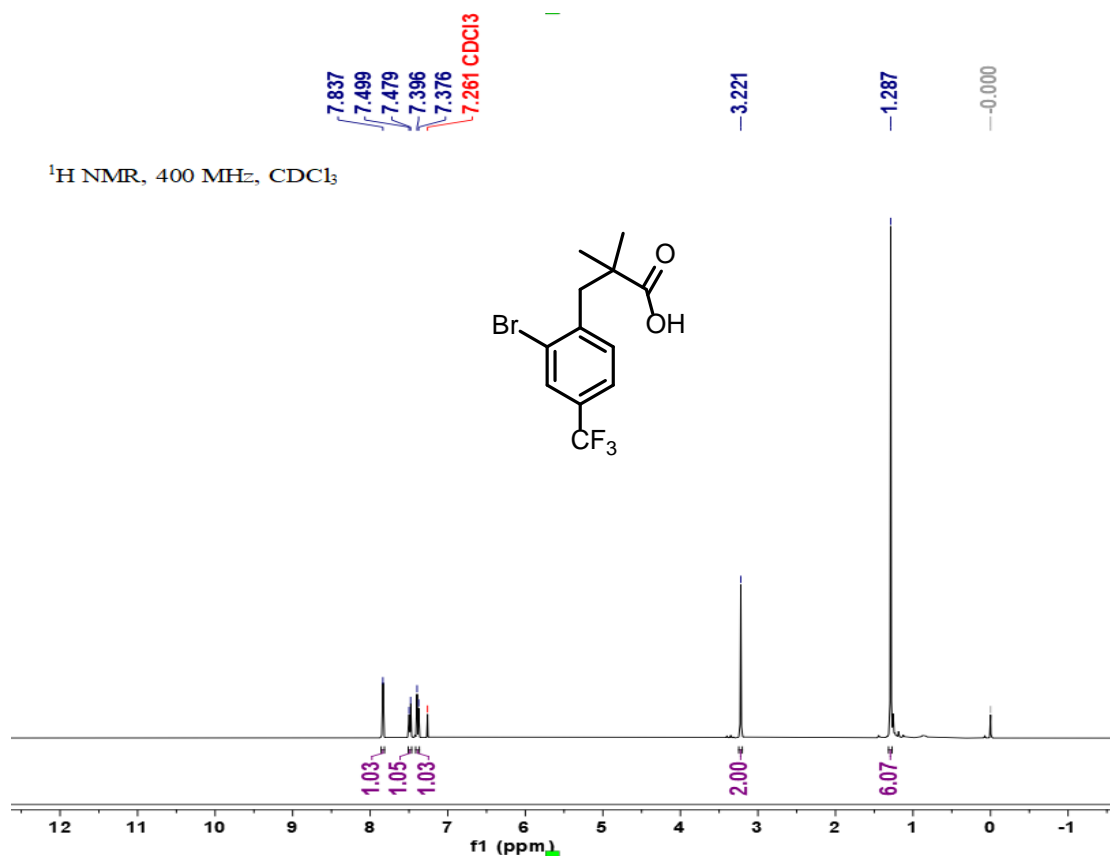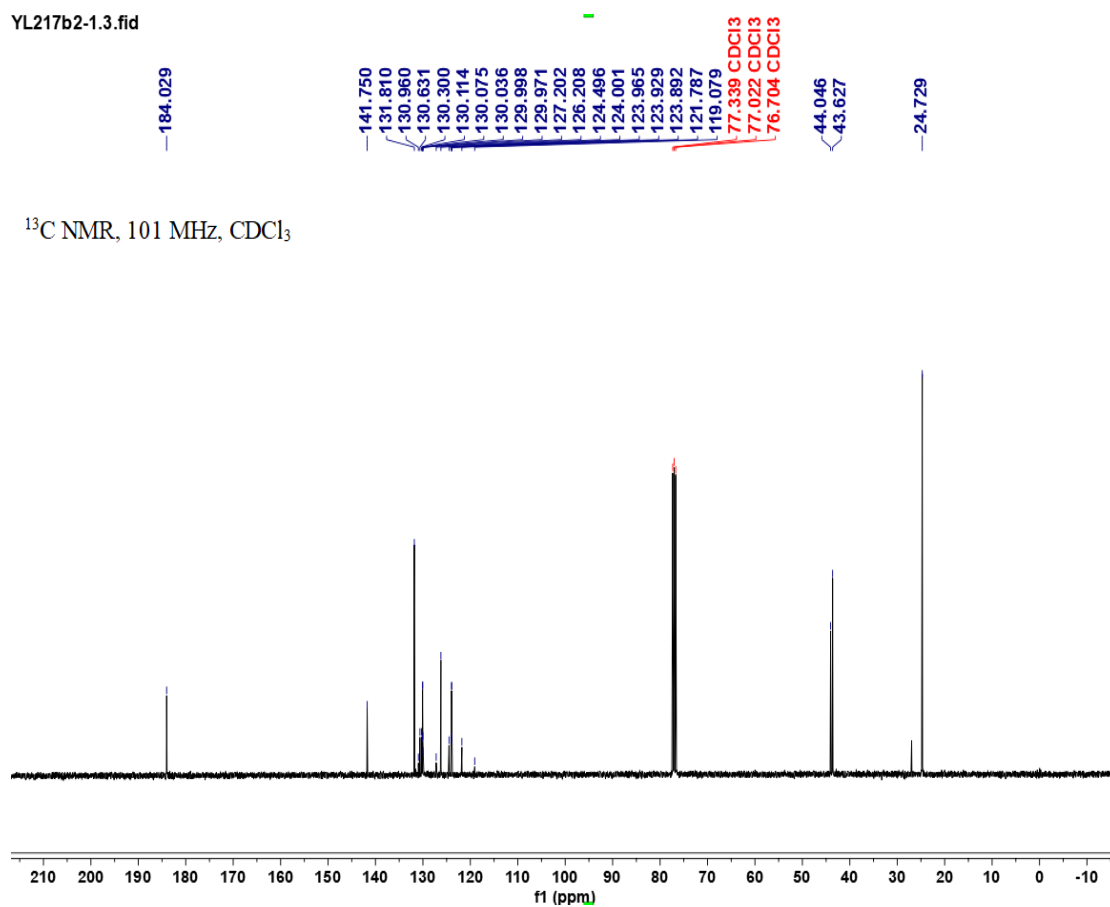

4YL217b2-1.2.fid

$^{19}\text{F}$  NMR, 376 MHz,  $\text{CDCl}_3$

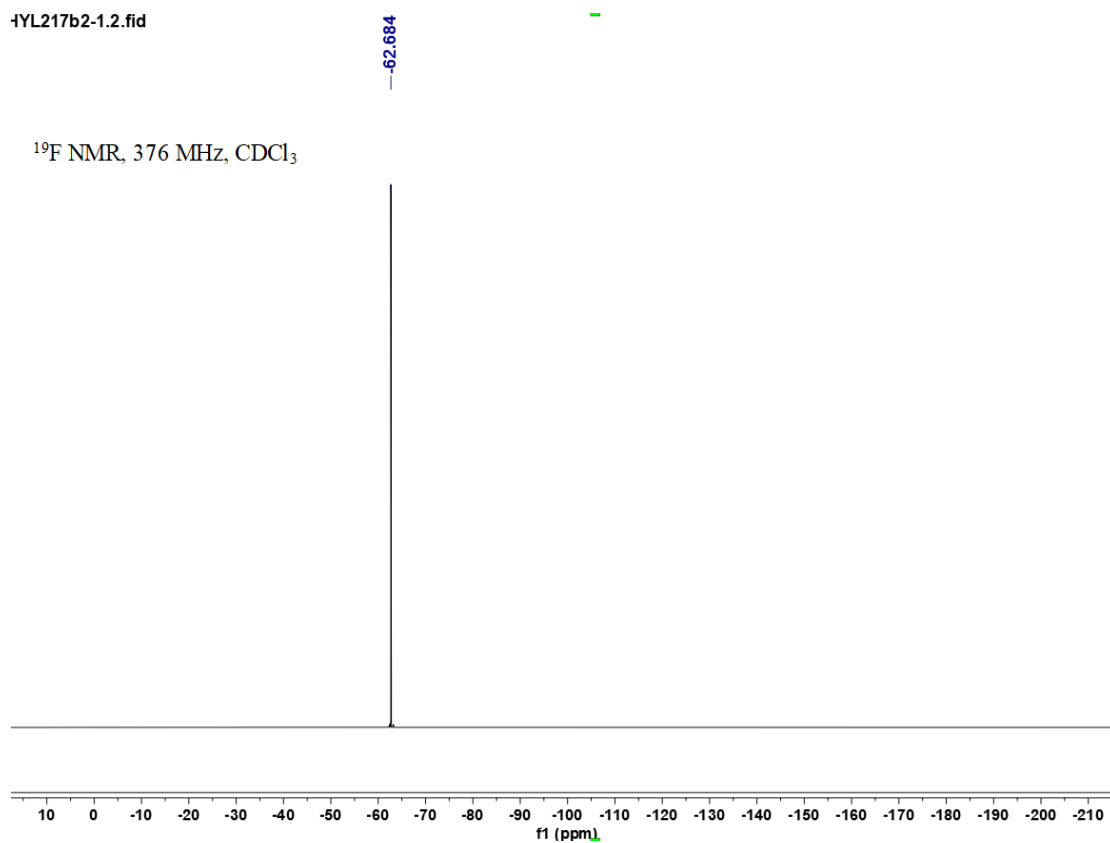

$^1\text{H}$  NMR (400 MHz),  $^{13}\text{C}$  NMR (101 MHz) and  $^{19}\text{F}$  NMR (376 MHz) spectra of **7-39**

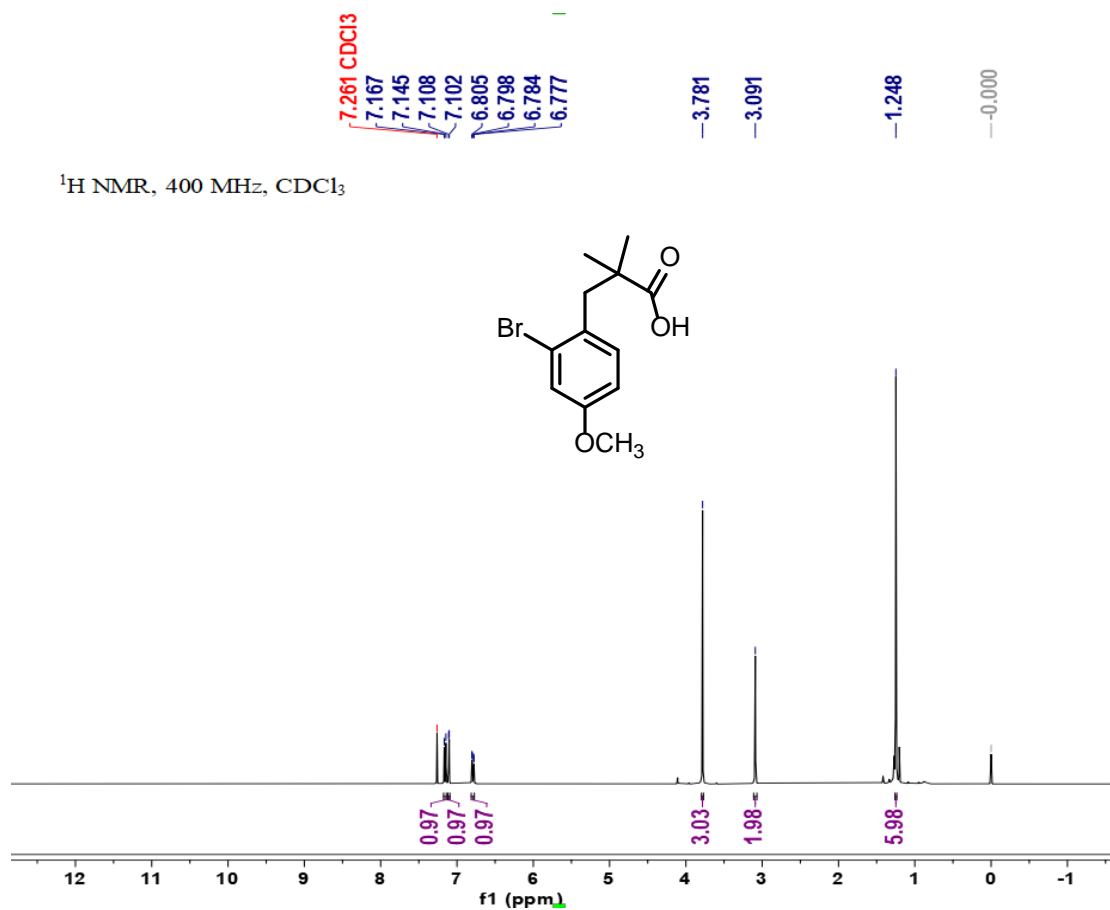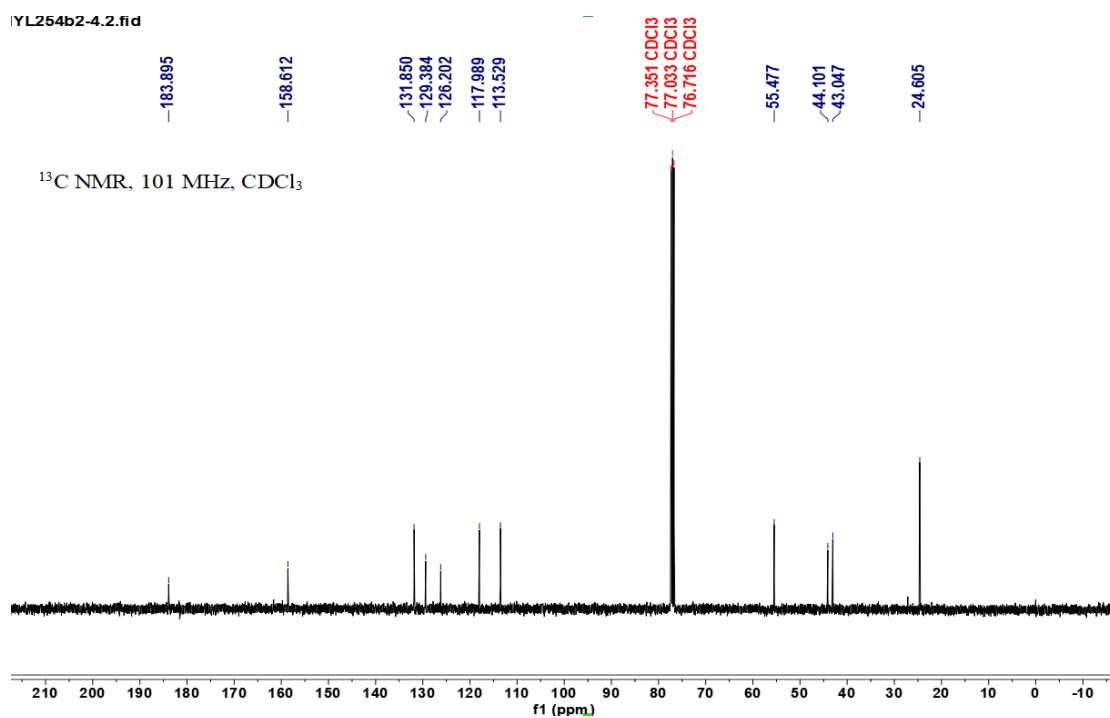

<sup>1</sup>H NMR (400 MHz) and <sup>13</sup>C NMR (101 MHz) spectra of **7-40**

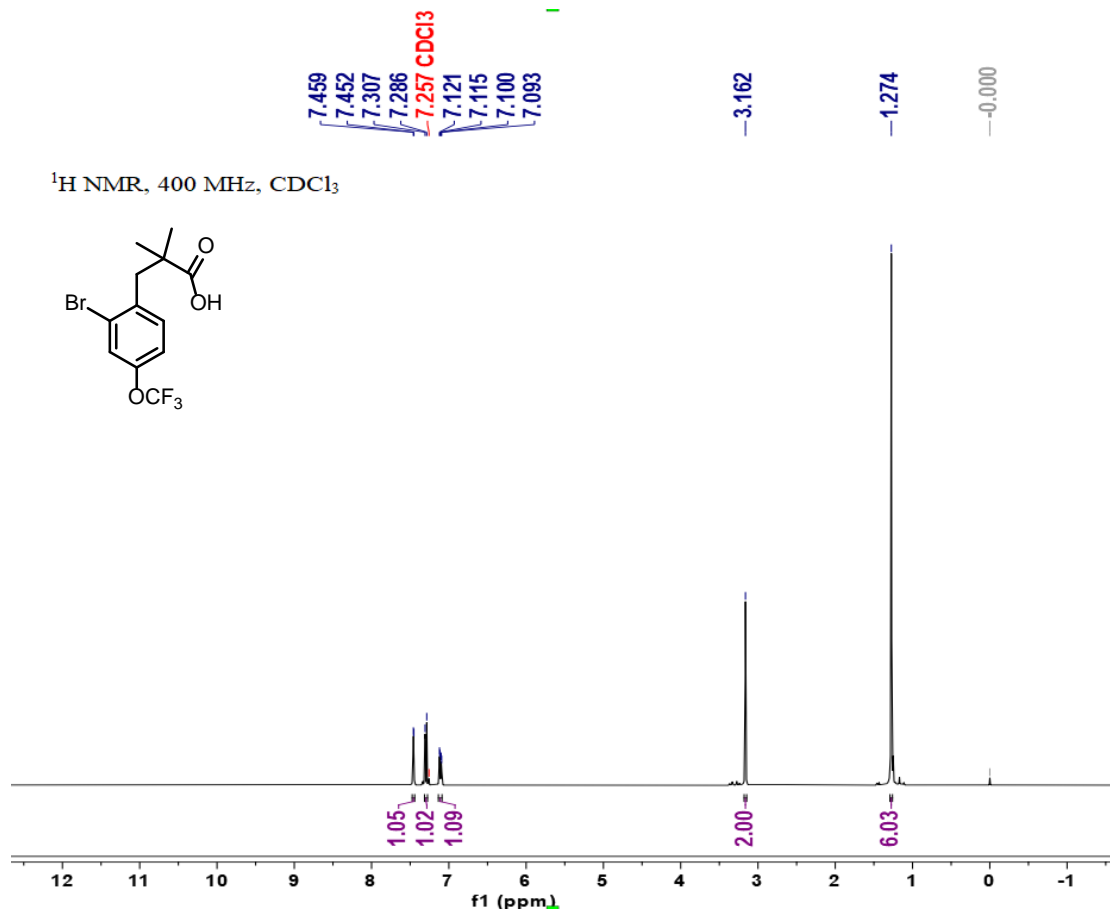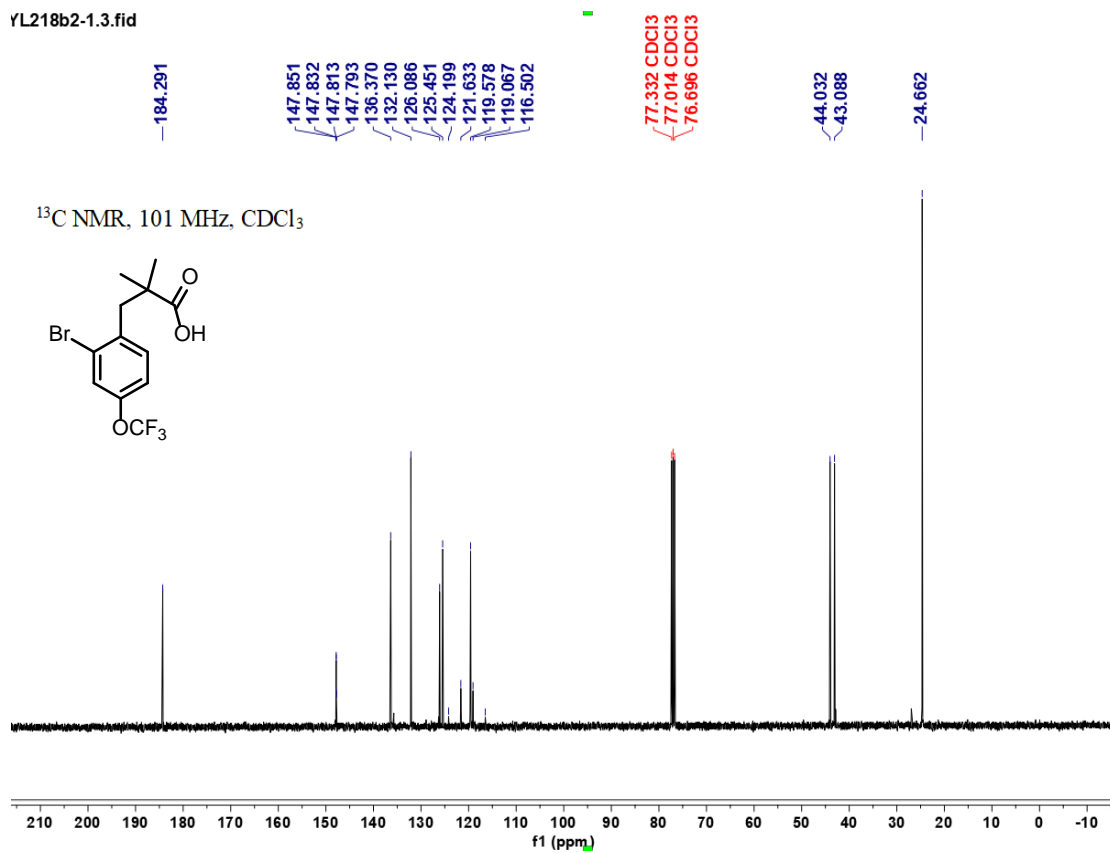

YL218b2-1.2.fid

$^{19}\text{F}$  NMR, 376 MHz,  $\text{CDCl}_3$

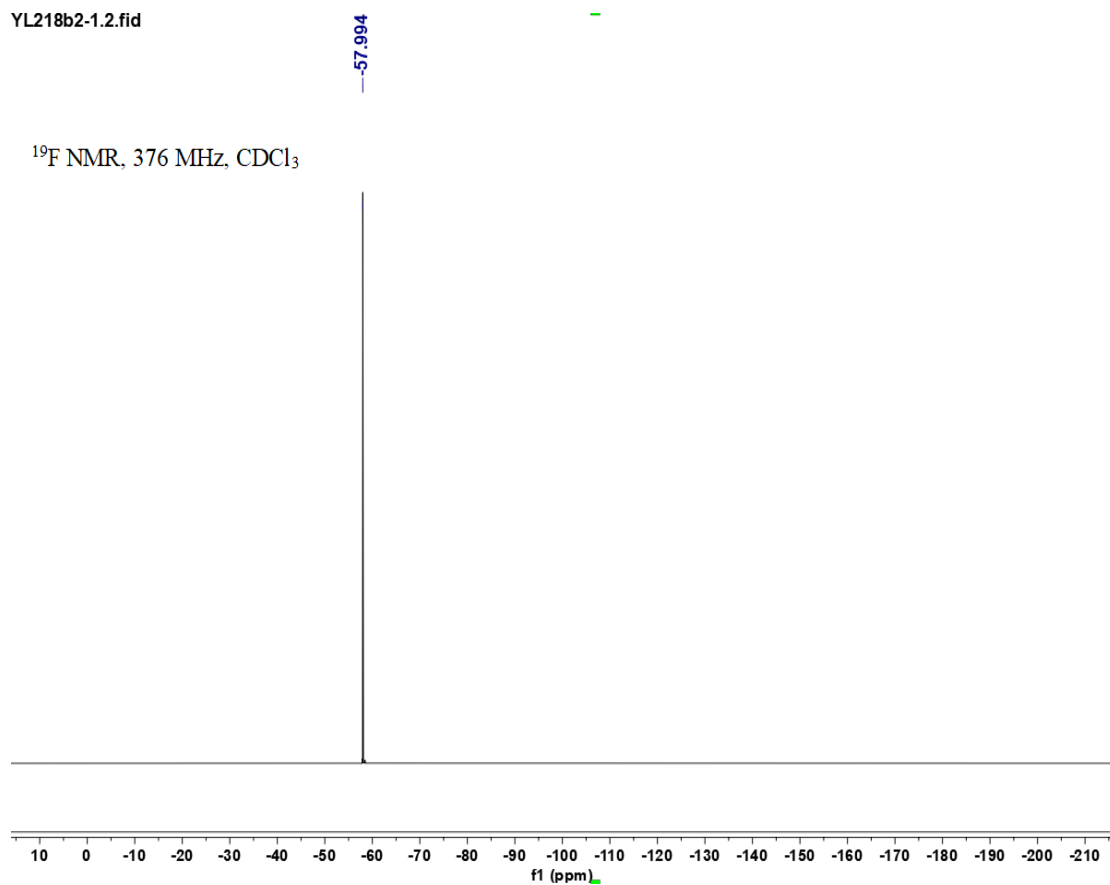

$^1\text{H}$  NMR (400 MHz),  $^{13}\text{C}$  NMR (101 MHz) and  $^{19}\text{F}$  NMR (376 MHz) spectra of **7-41**

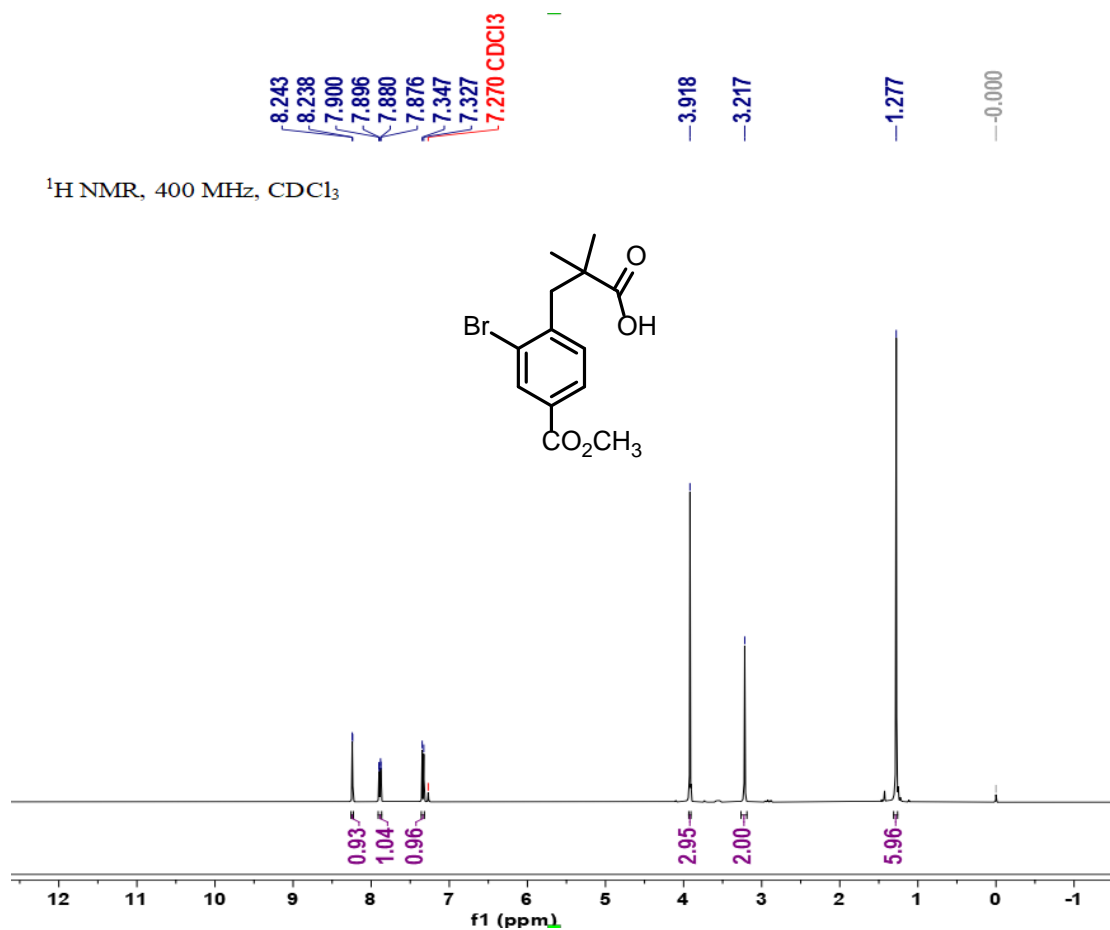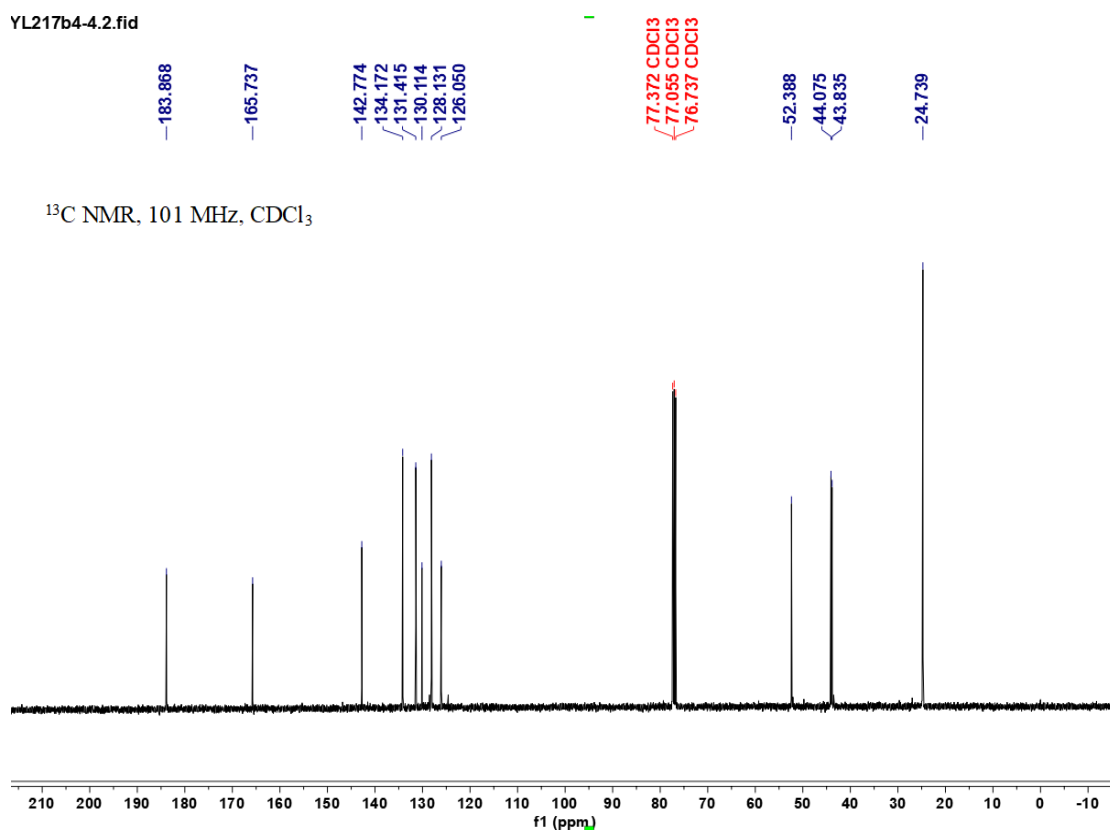

<sup>13</sup>C NMR, 101 MHz, CDCl<sub>3</sub>

<sup>1</sup>H NMR (400 MHz) and <sup>13</sup>C NMR (101 MHz) spectra of 7-42

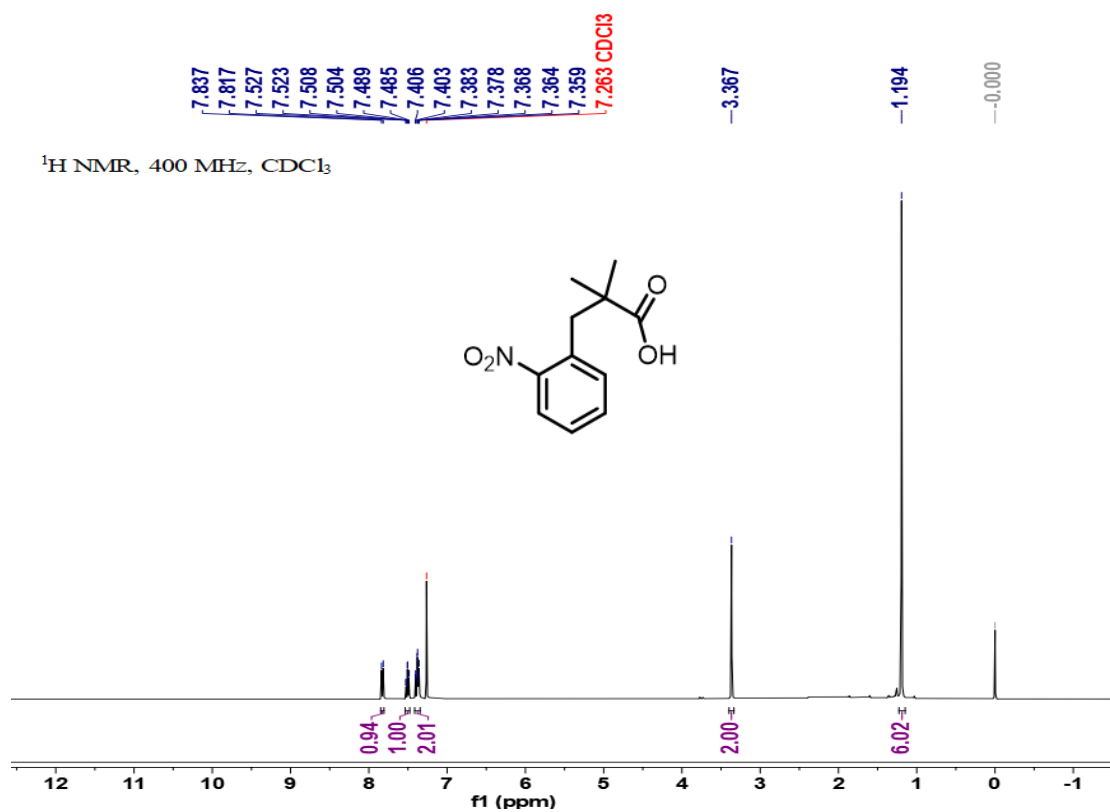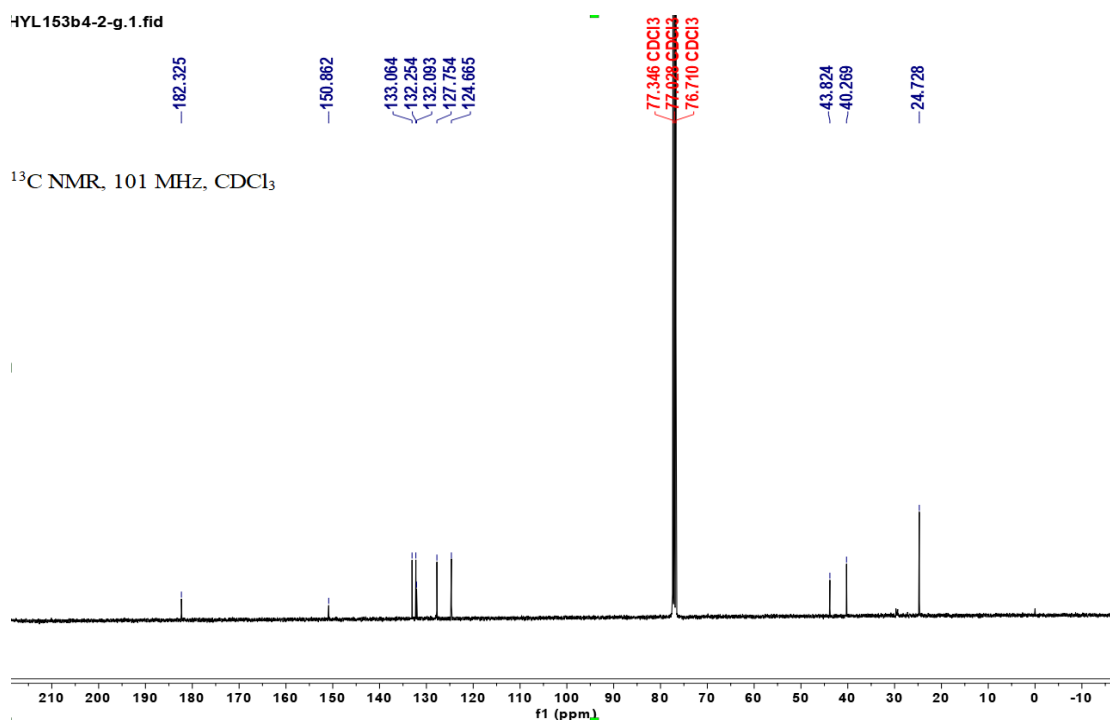

<sup>1</sup>H NMR (400 MHz) and <sup>13</sup>C NMR (101 MHz) spectra of **7-43**

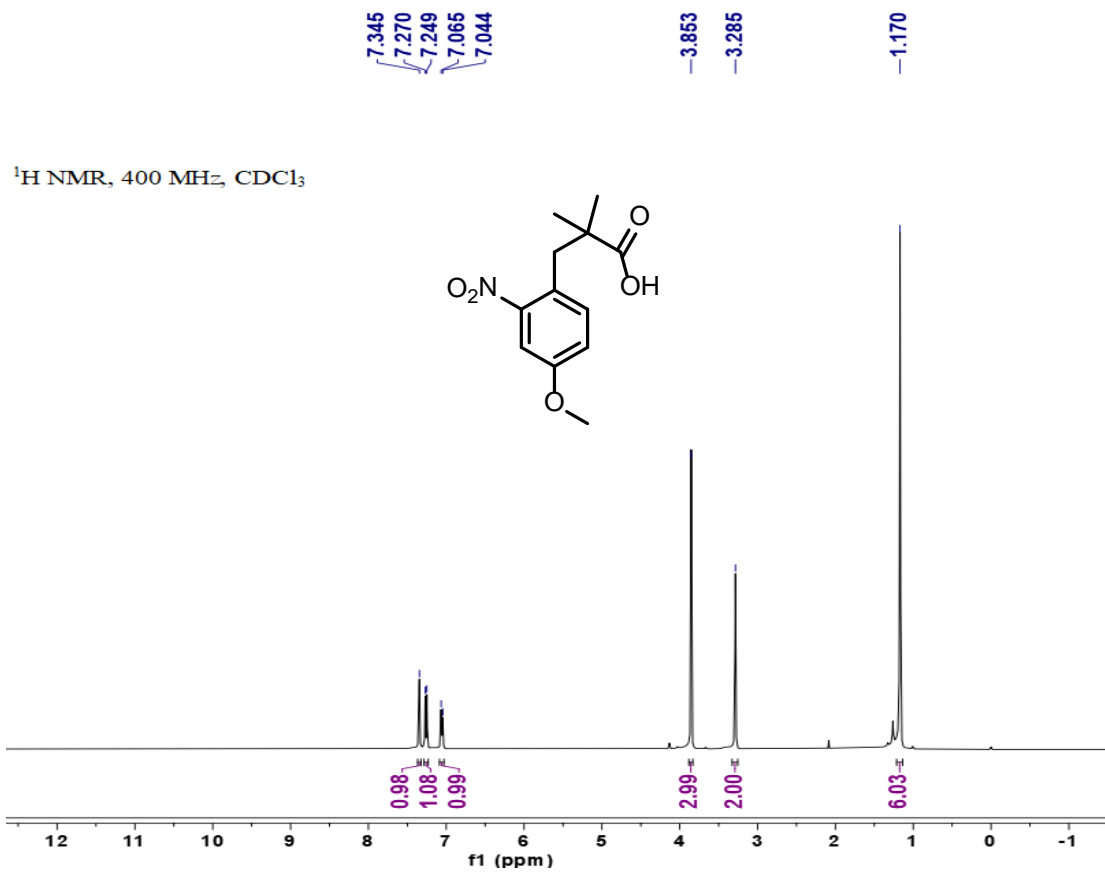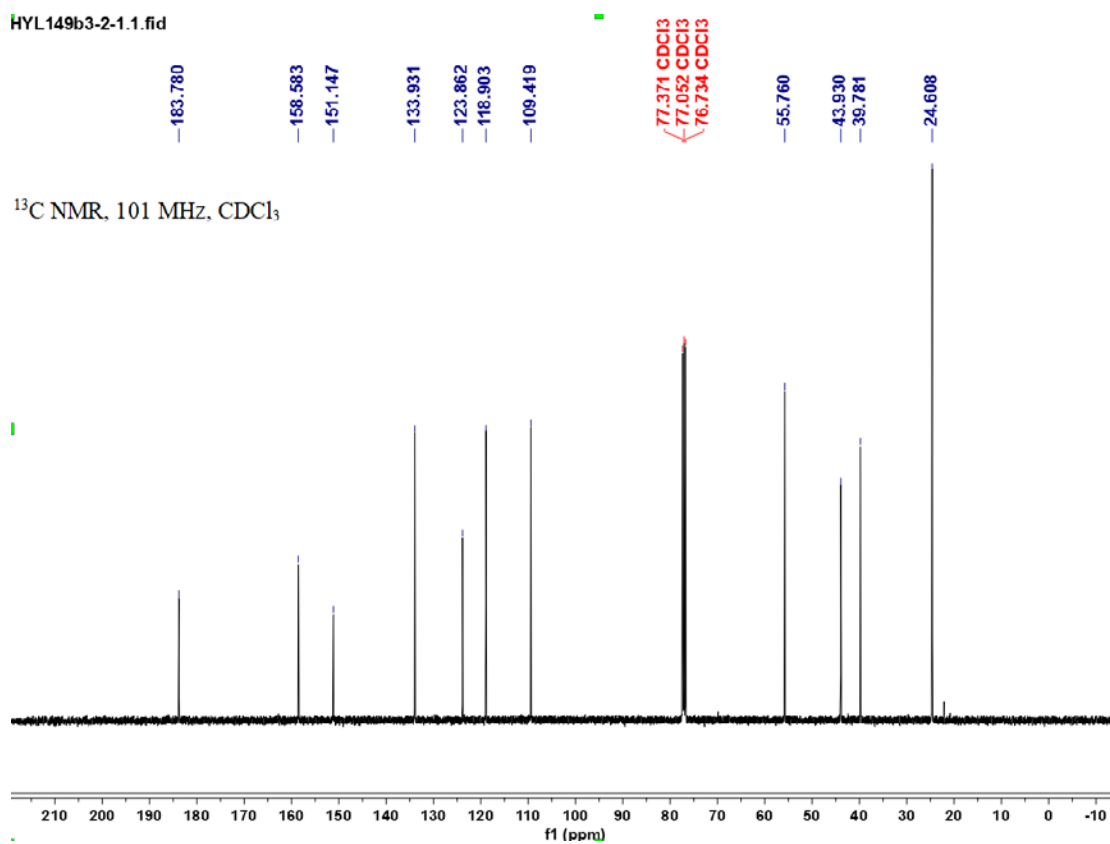

<sup>1</sup>H NMR (400 MHz) and <sup>13</sup>C NMR (101 MHz) spectra of **7-44**



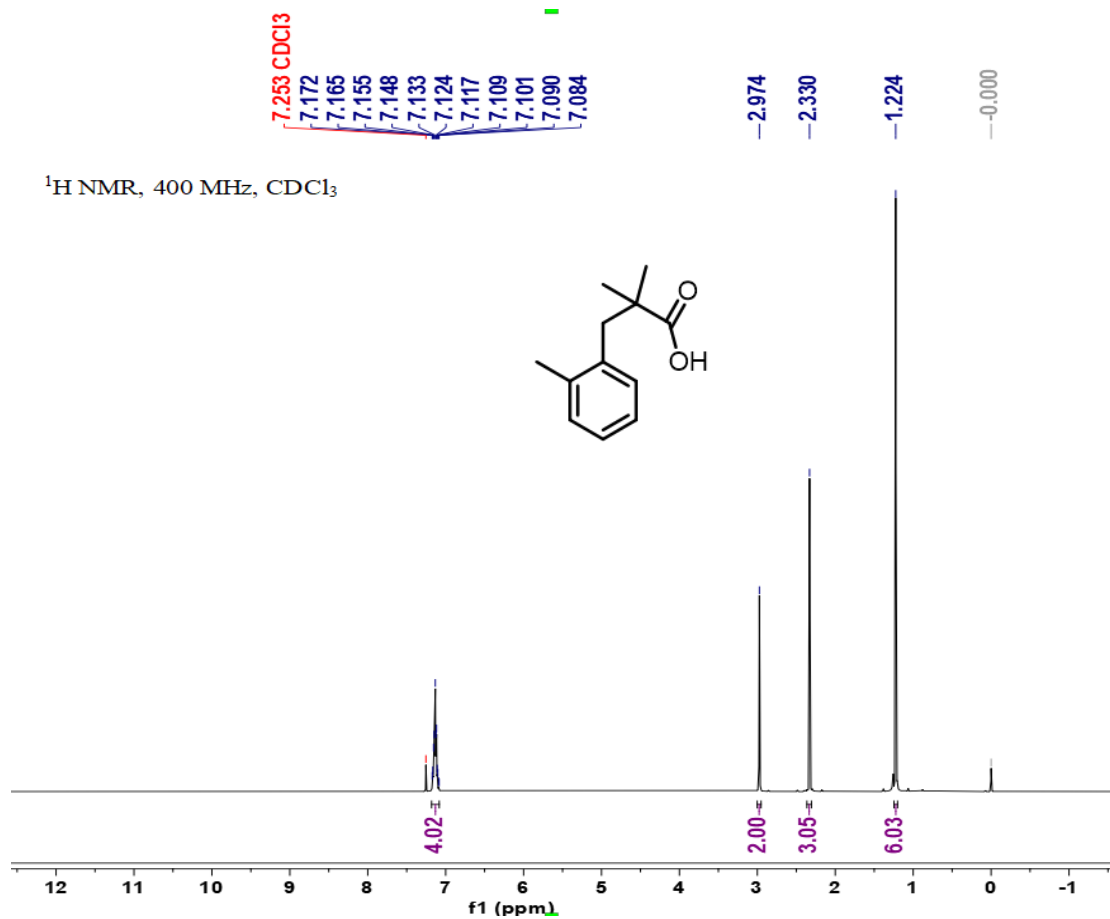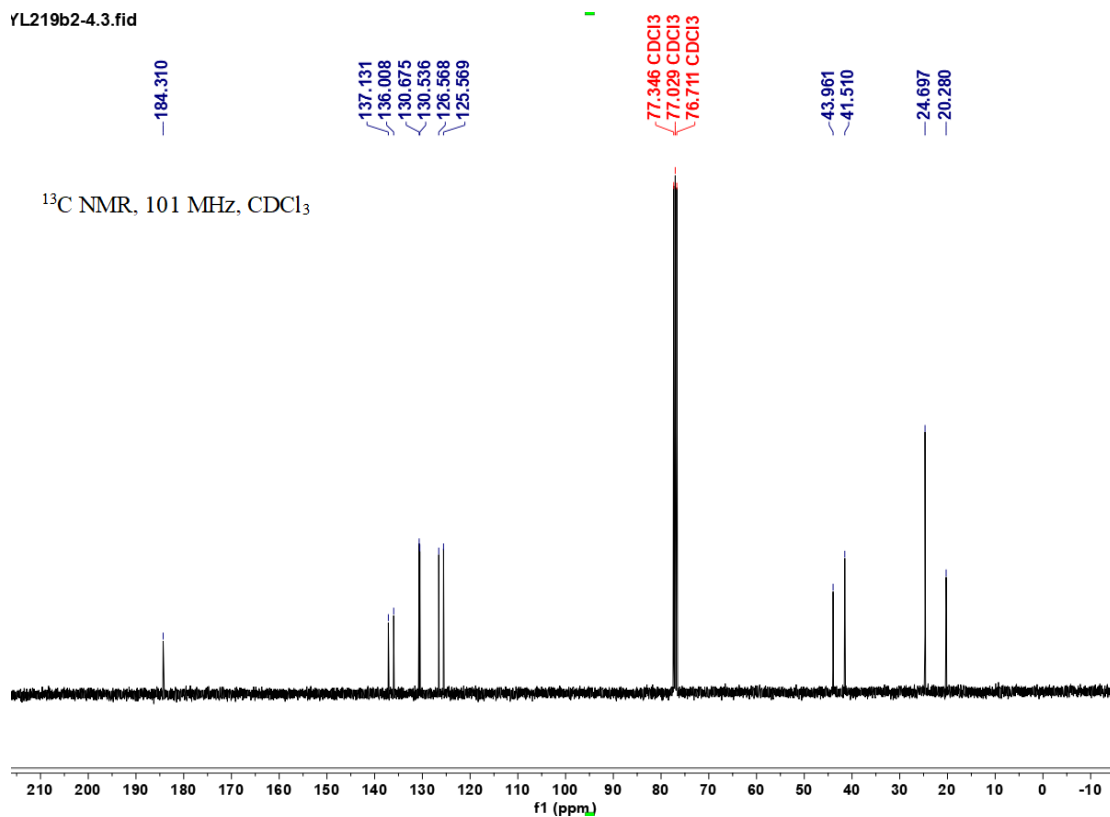

<sup>1</sup>H NMR (400 MHz) and <sup>13</sup>C NMR (101 MHz) spectra of **7-45**

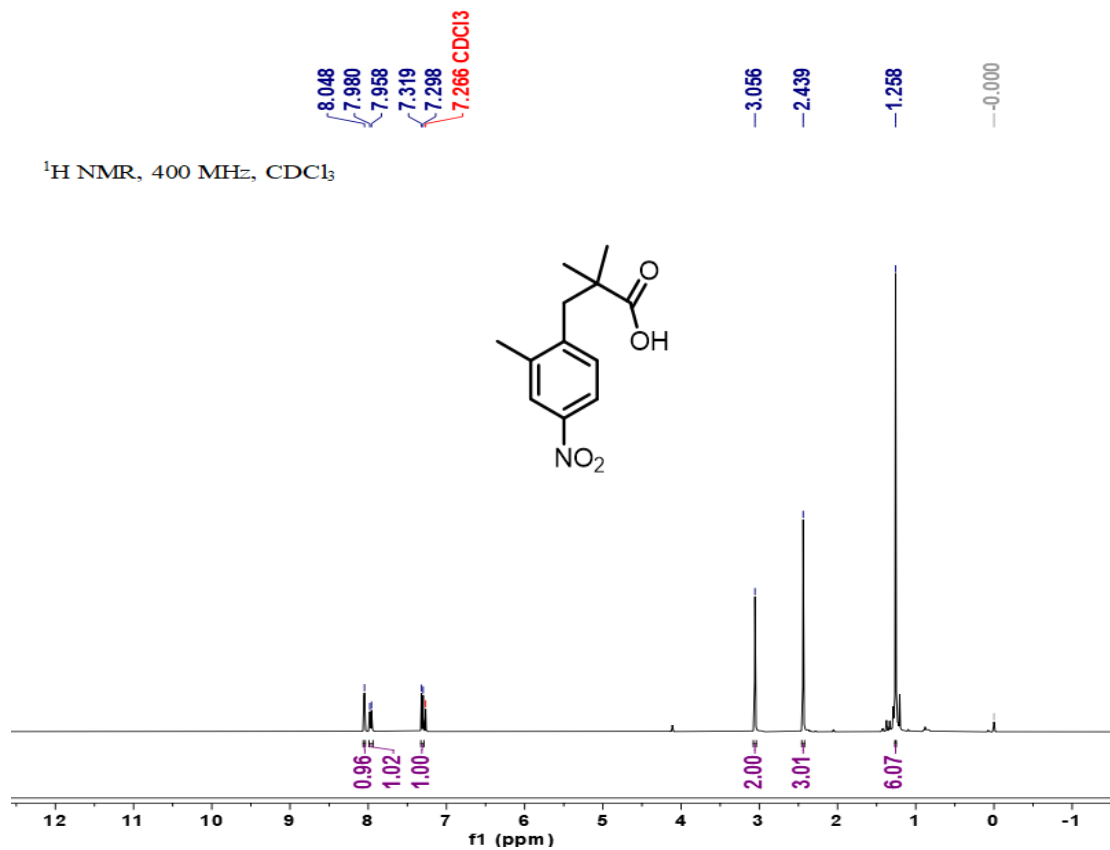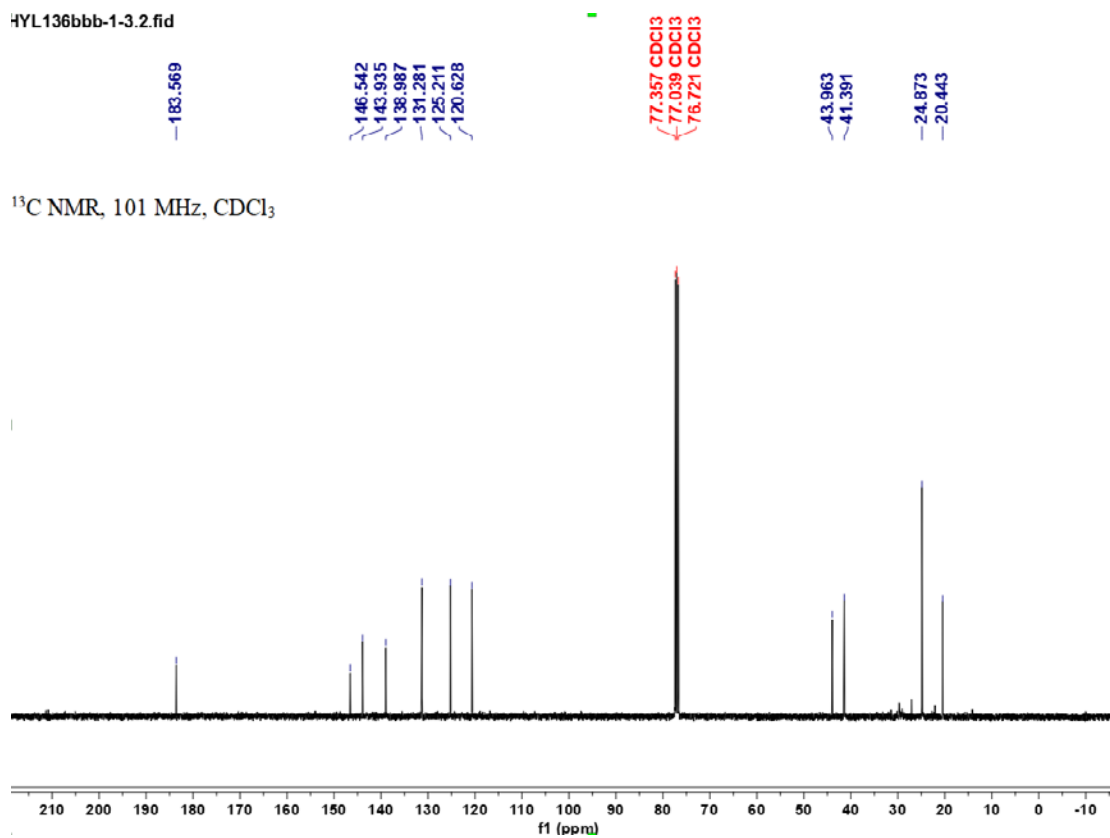

<sup>1</sup>H NMR (400 MHz) and <sup>13</sup>C NMR (101 MHz) spectra of **7-46**

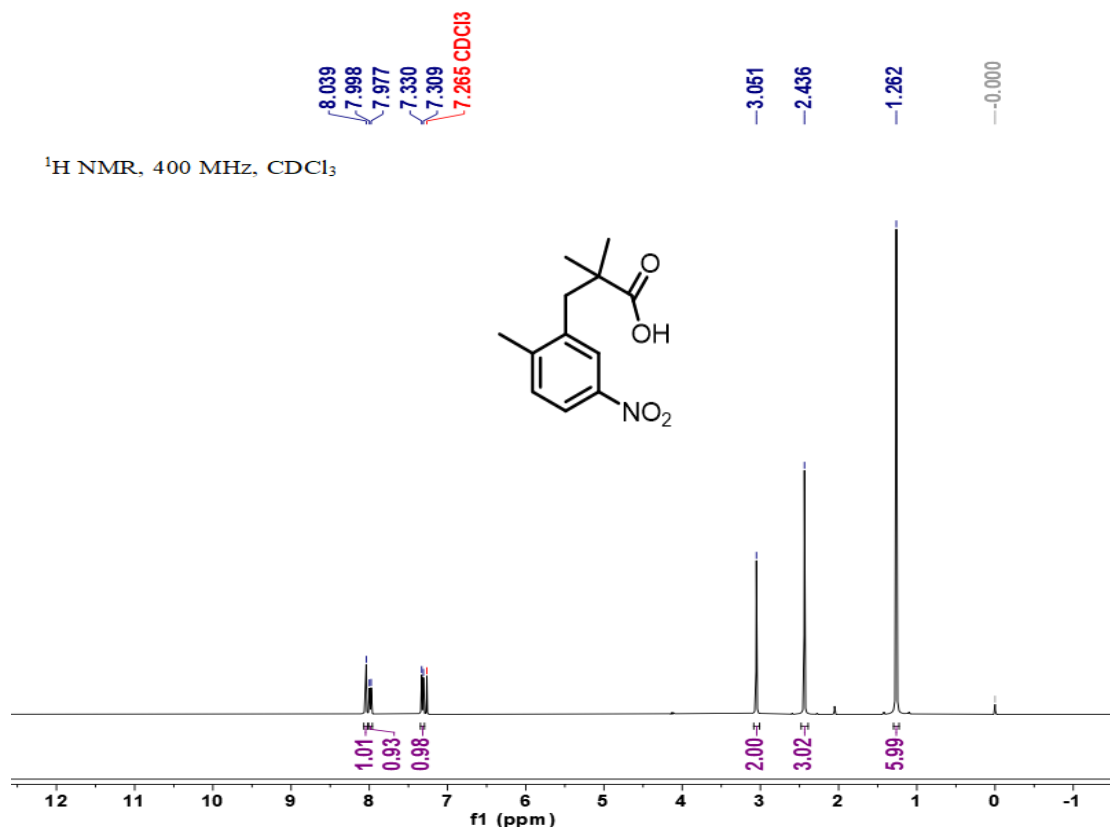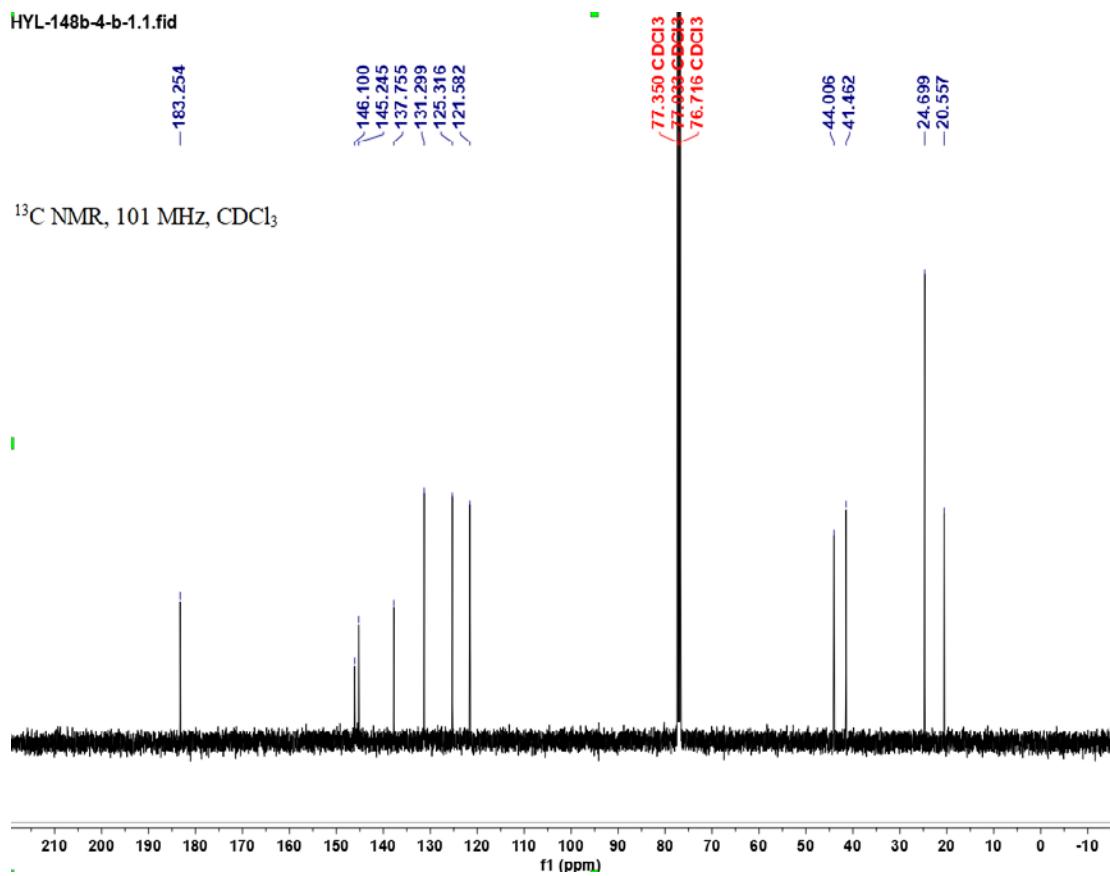

<sup>1</sup>H NMR (400 MHz) and <sup>13</sup>C NMR (101 MHz) spectra of 7-47

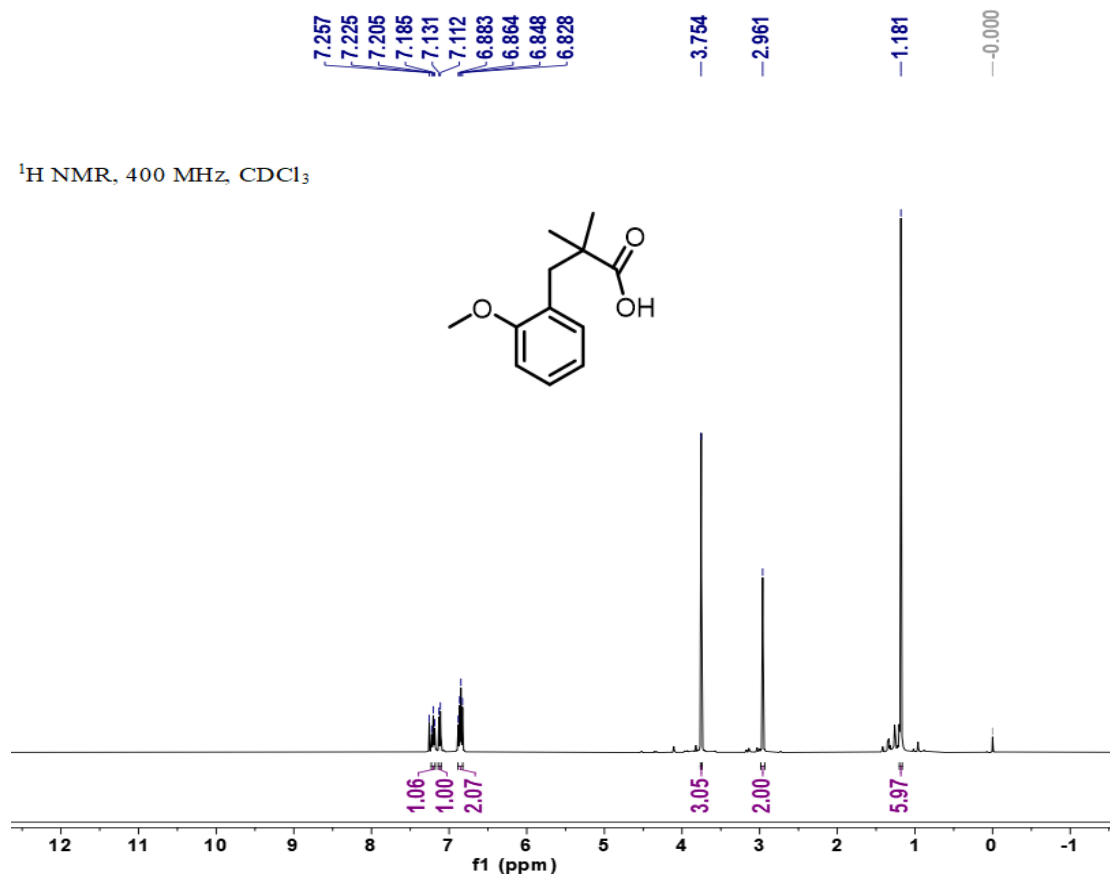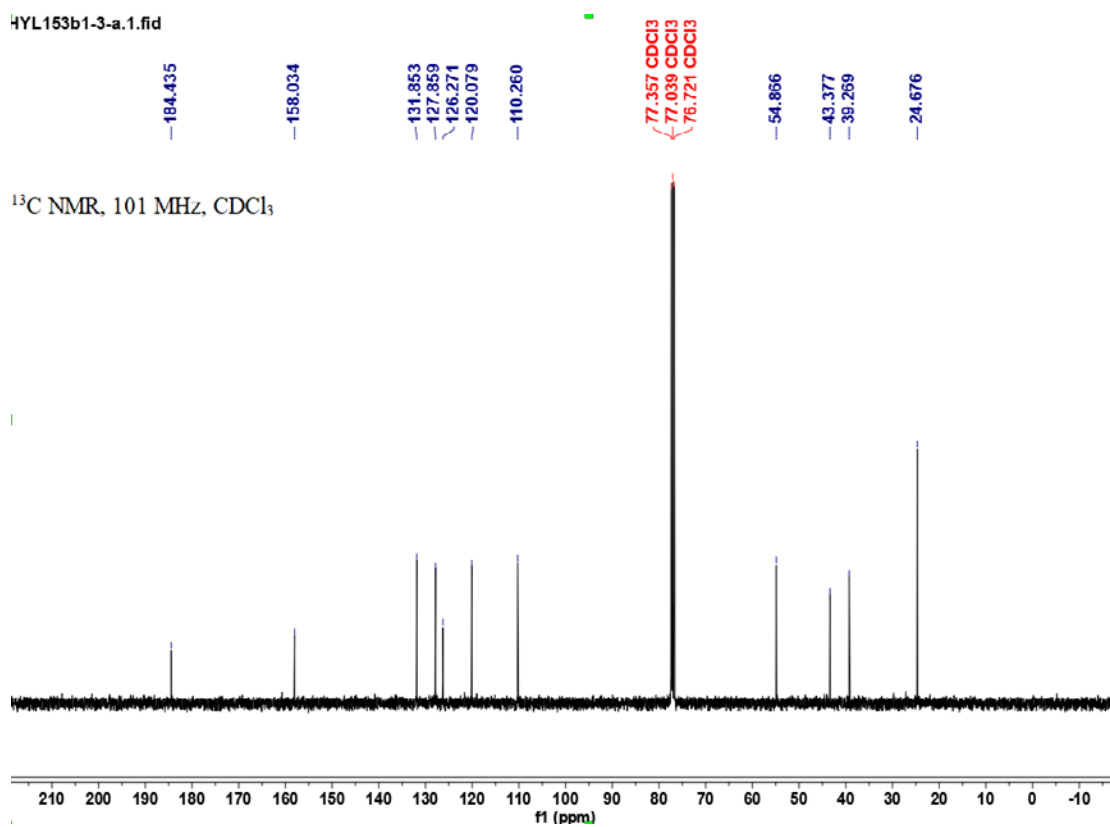

<sup>1</sup>H NMR (400 MHz) and <sup>13</sup>C NMR (101 MHz) spectra of 7-48

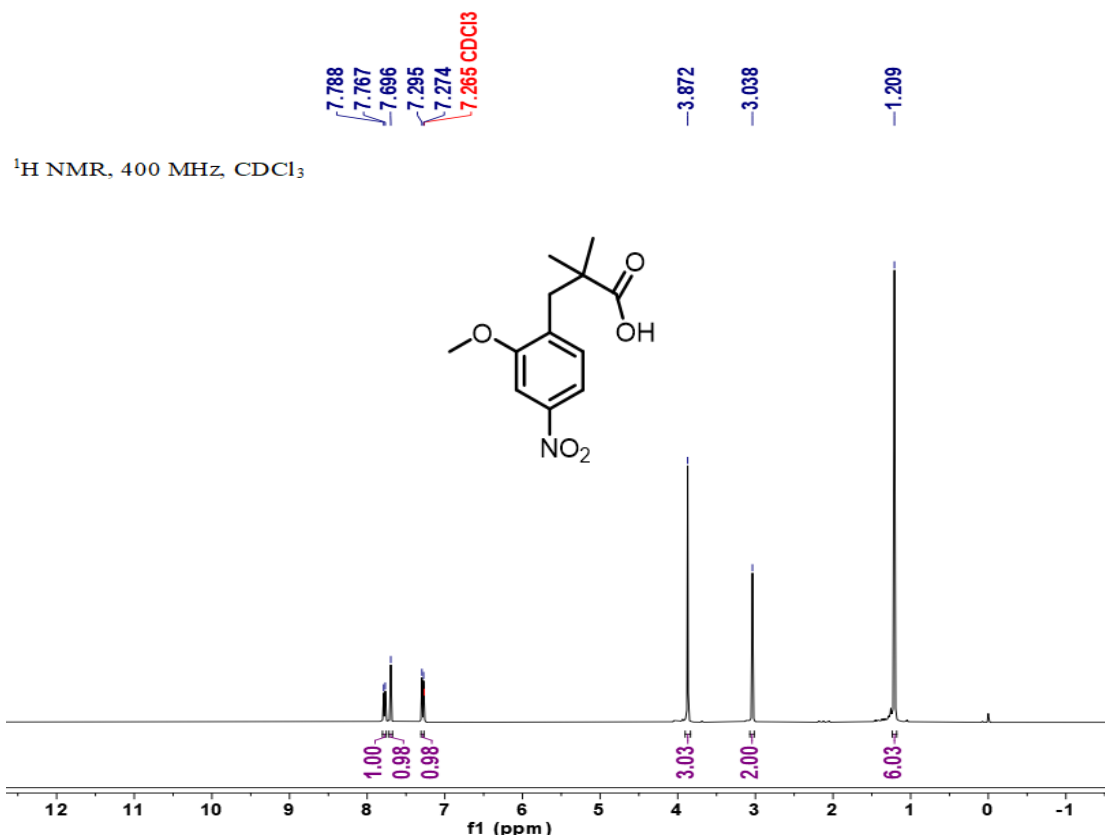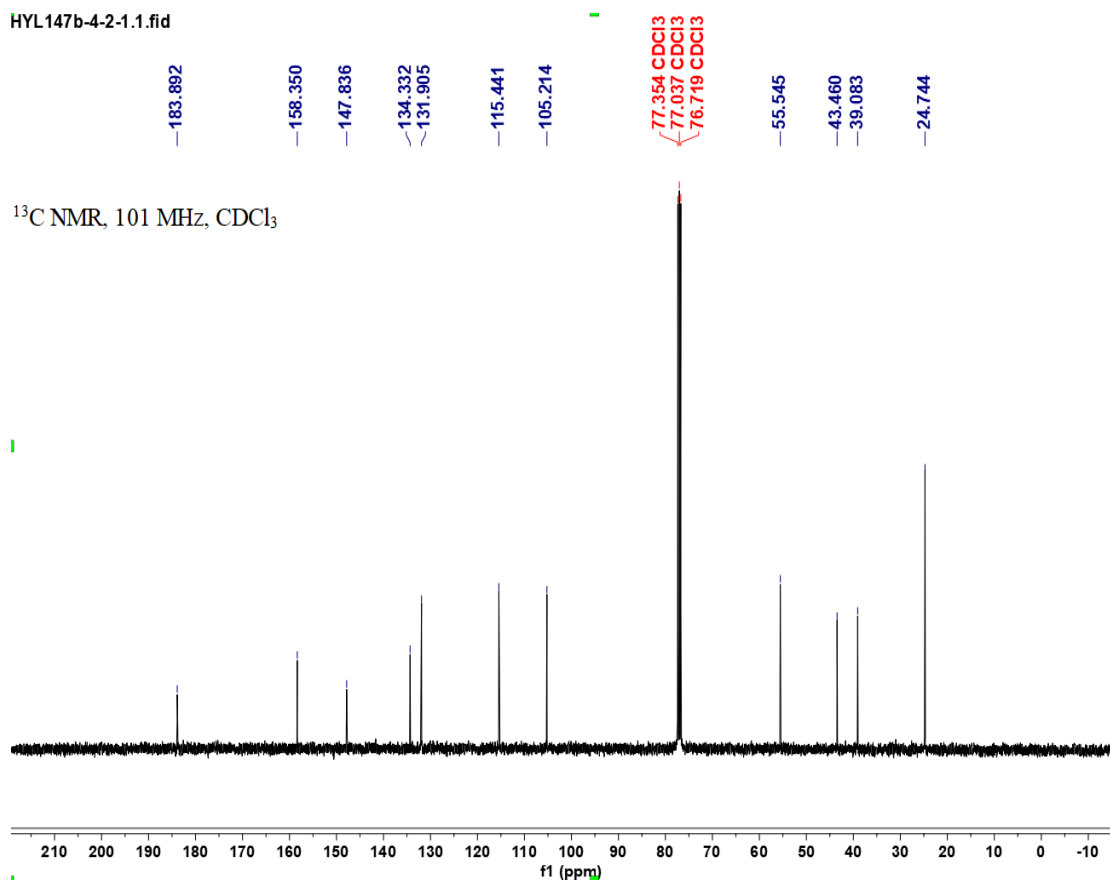

<sup>1</sup>H NMR (400 MHz) and <sup>13</sup>C NMR (101 MHz) spectra of **7-49**

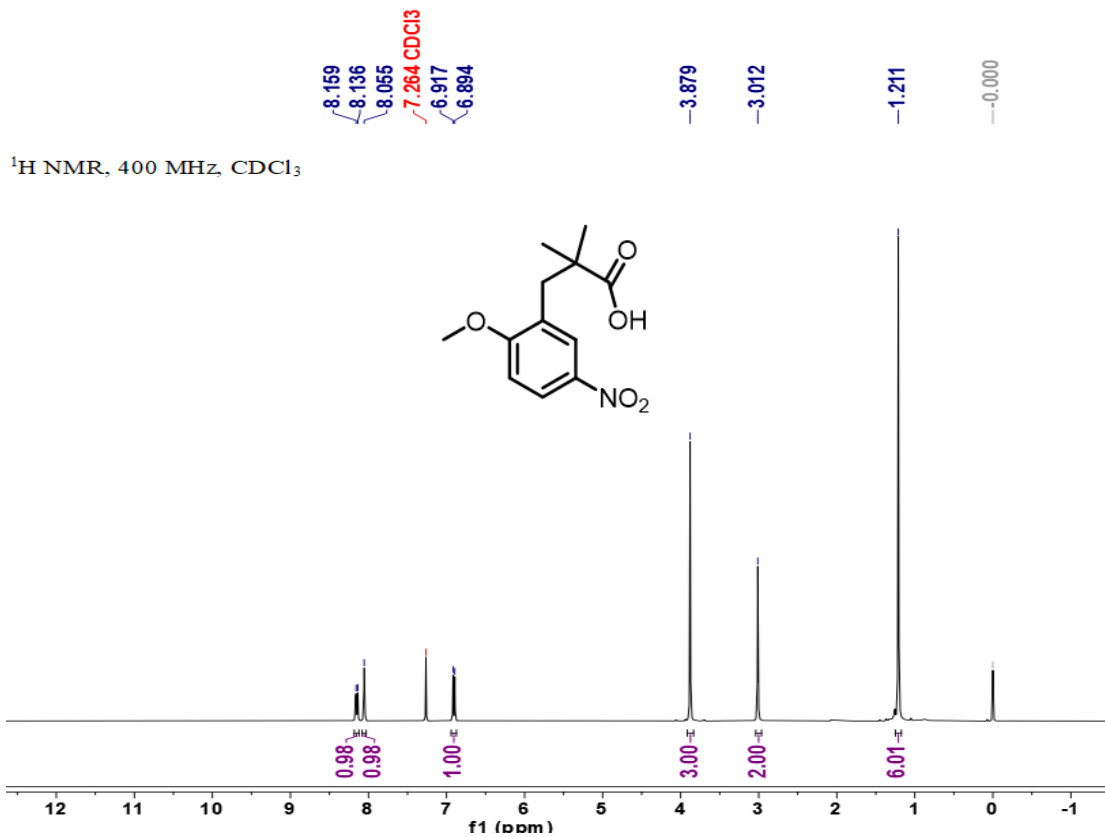

HYL149b2-2-a.2.fid

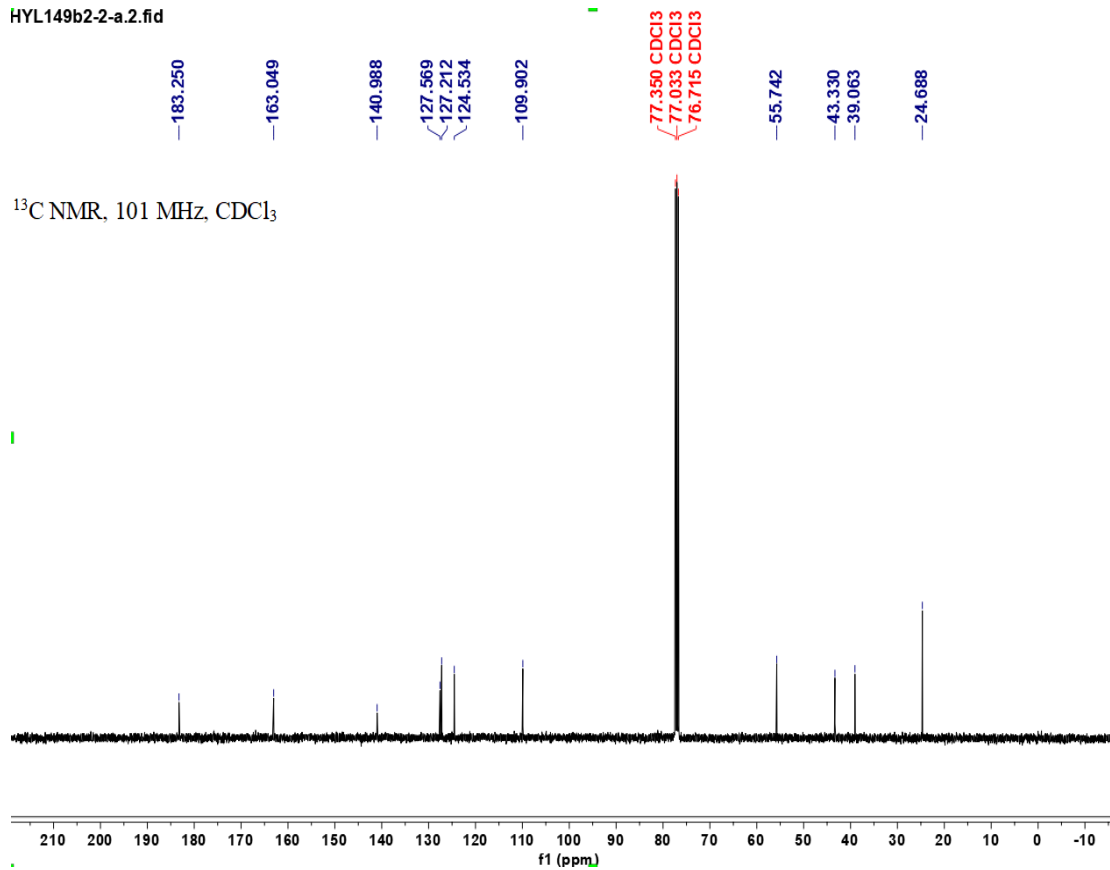

<sup>1</sup>H NMR (400 MHz) and <sup>13</sup>C NMR (101 MHz) spectra of **7-50**

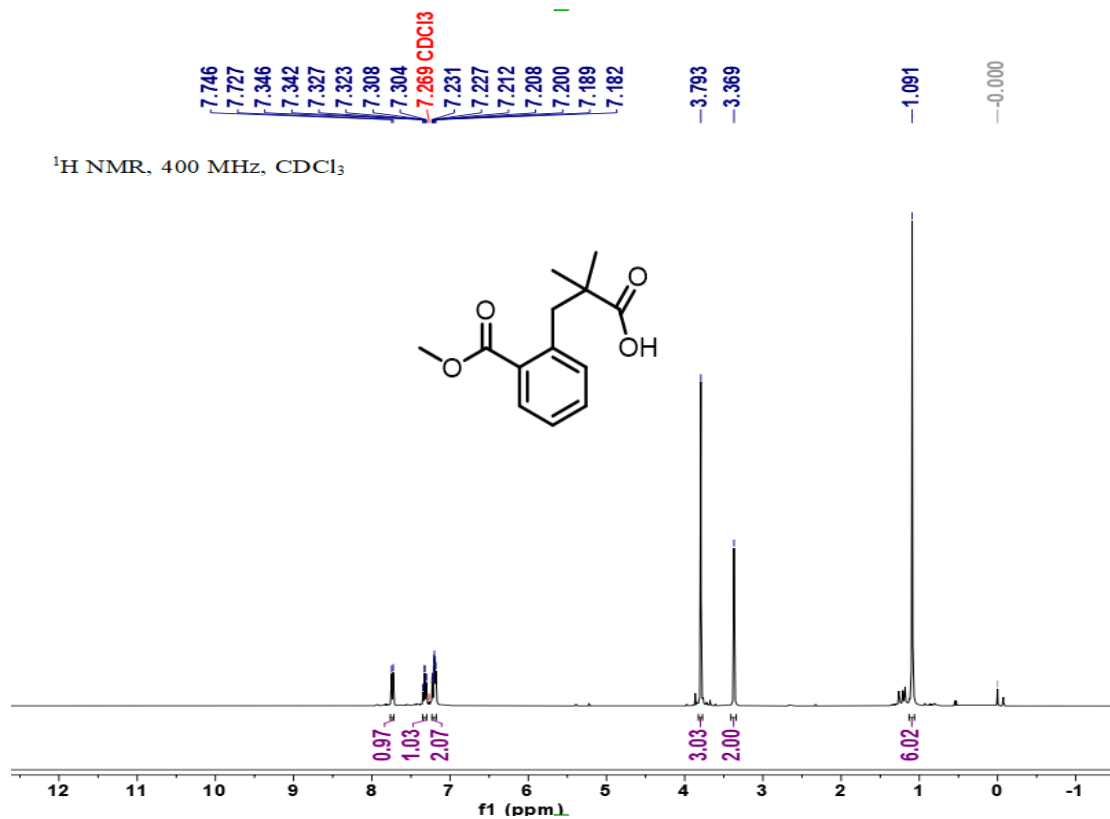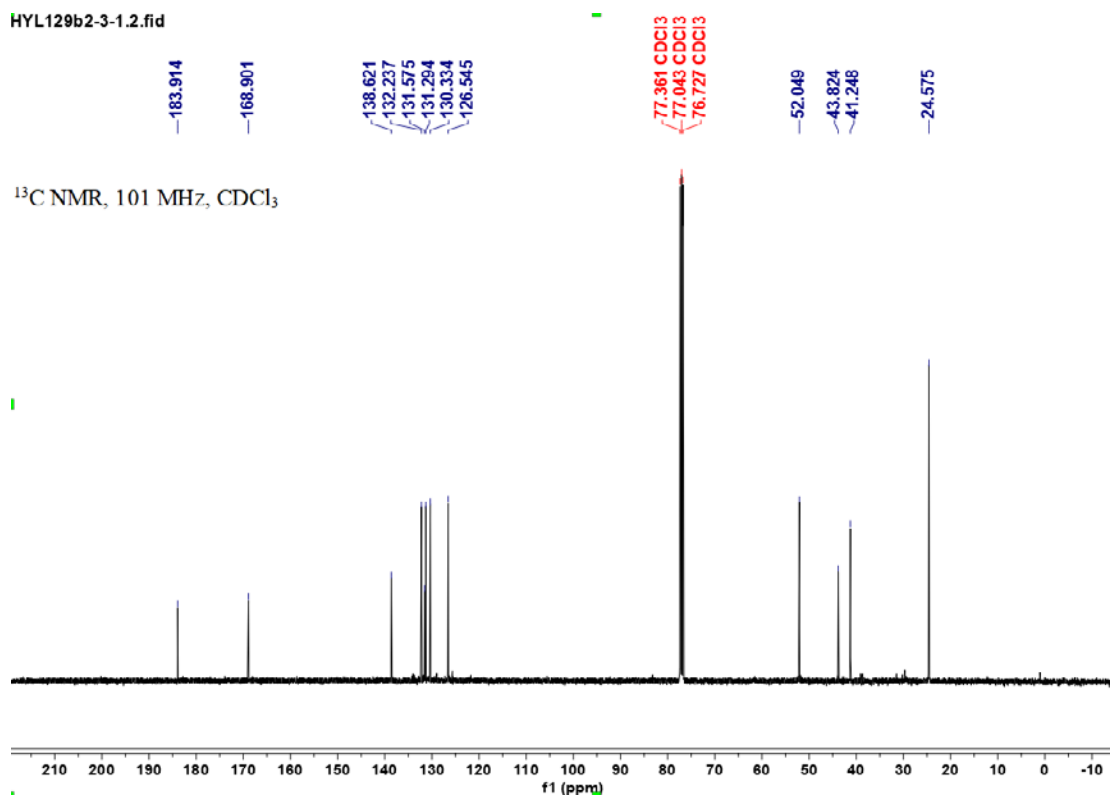

<sup>1</sup>H NMR (400 MHz) and <sup>13</sup>C NMR (101 MHz) spectra of **7-51**

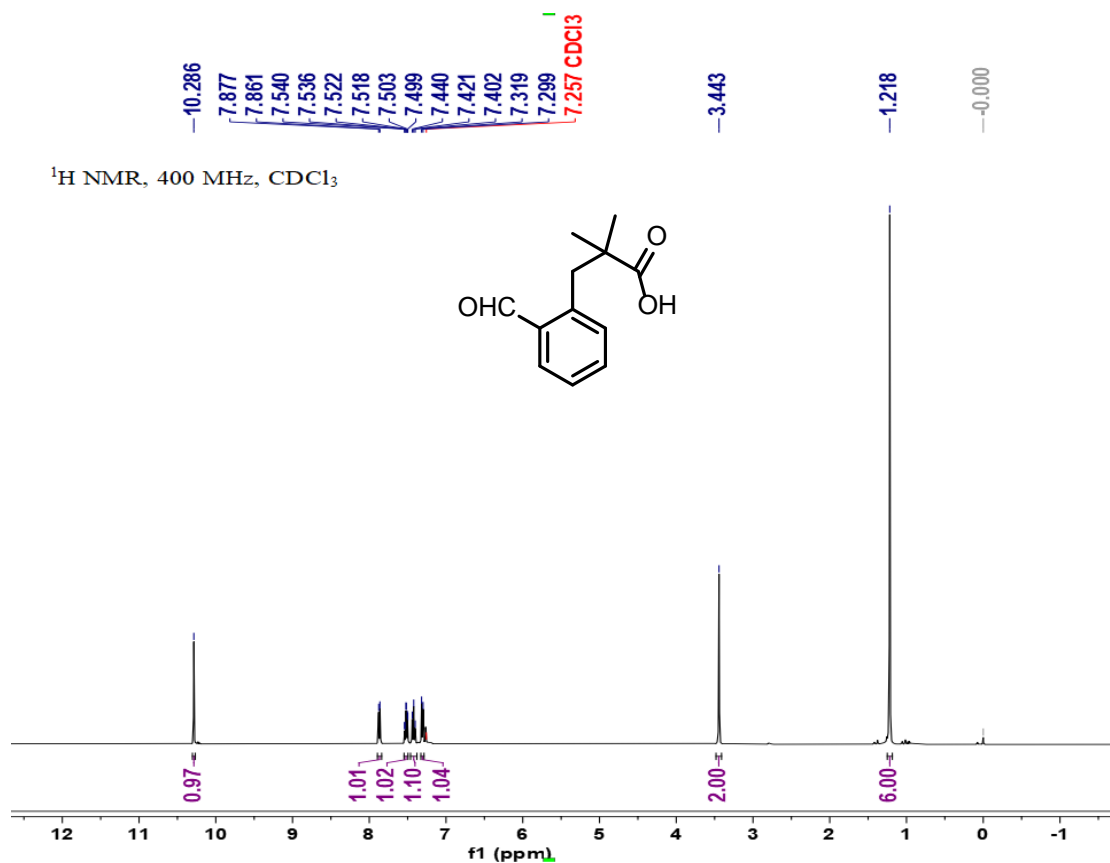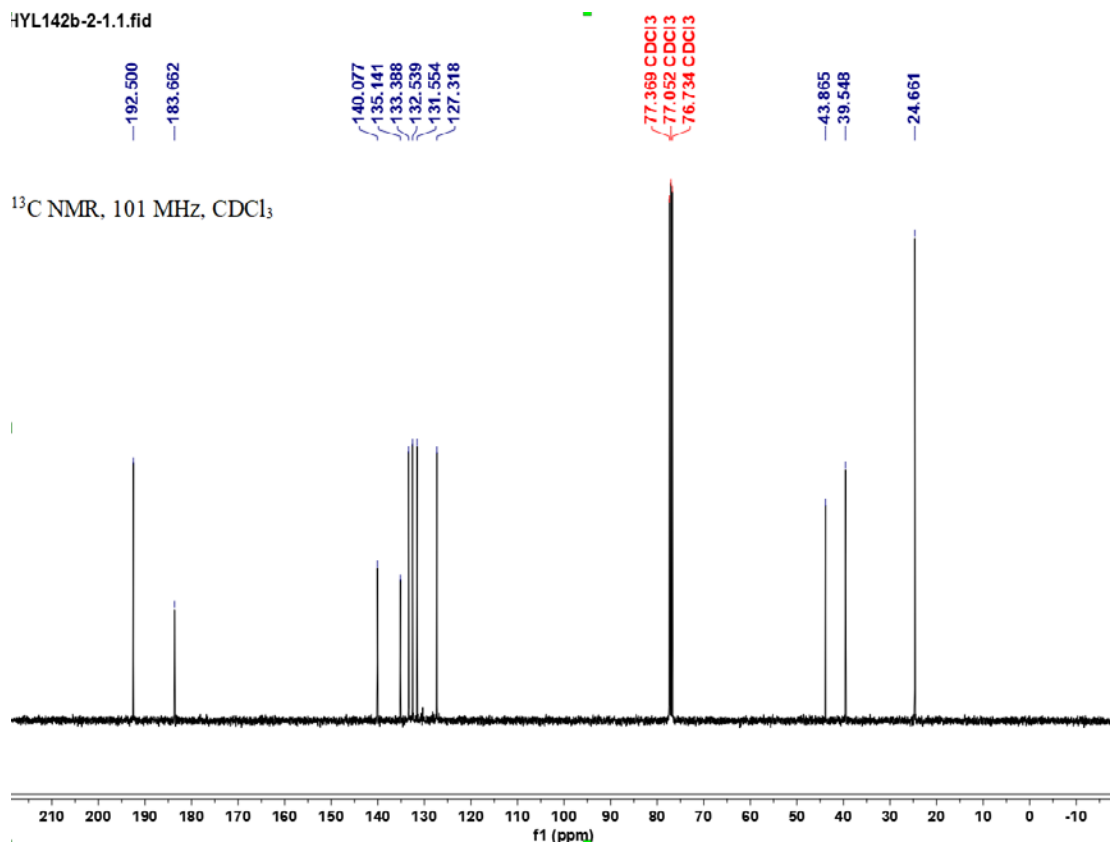

<sup>1</sup>H NMR (400 MHz) and <sup>13</sup>C NMR (101 MHz) spectra of **7-52**



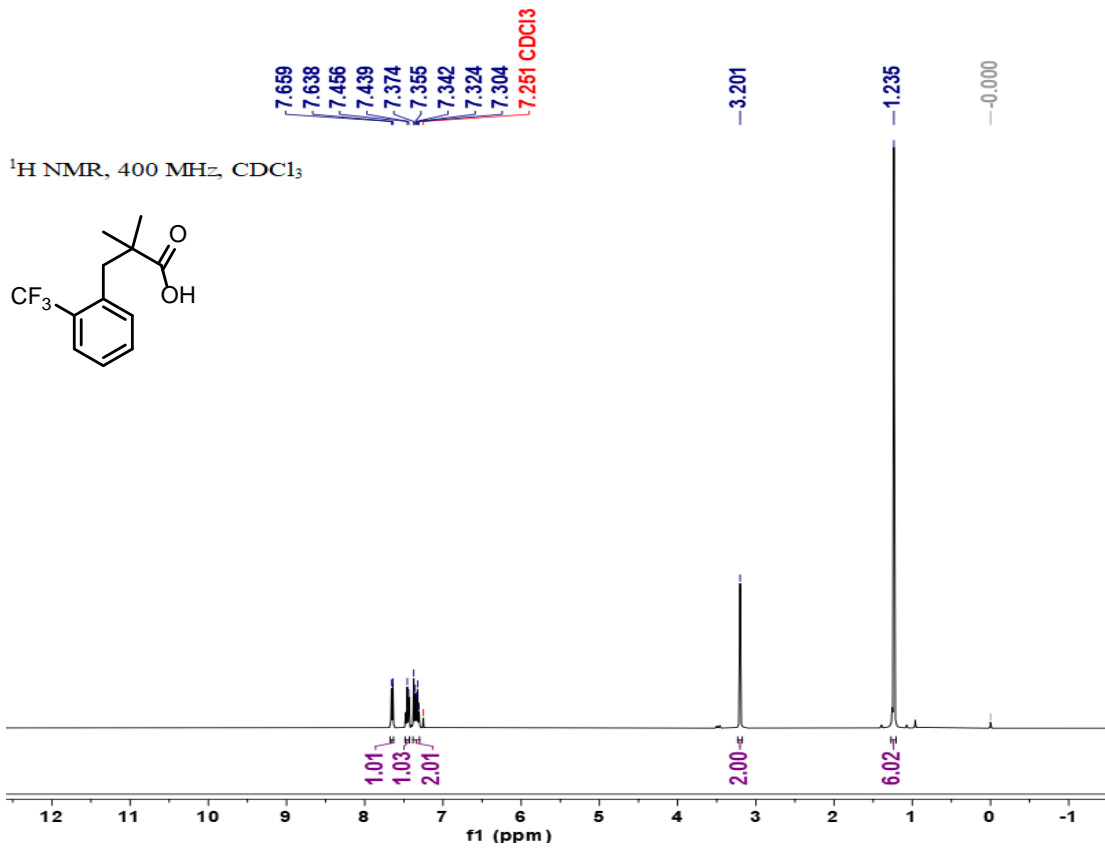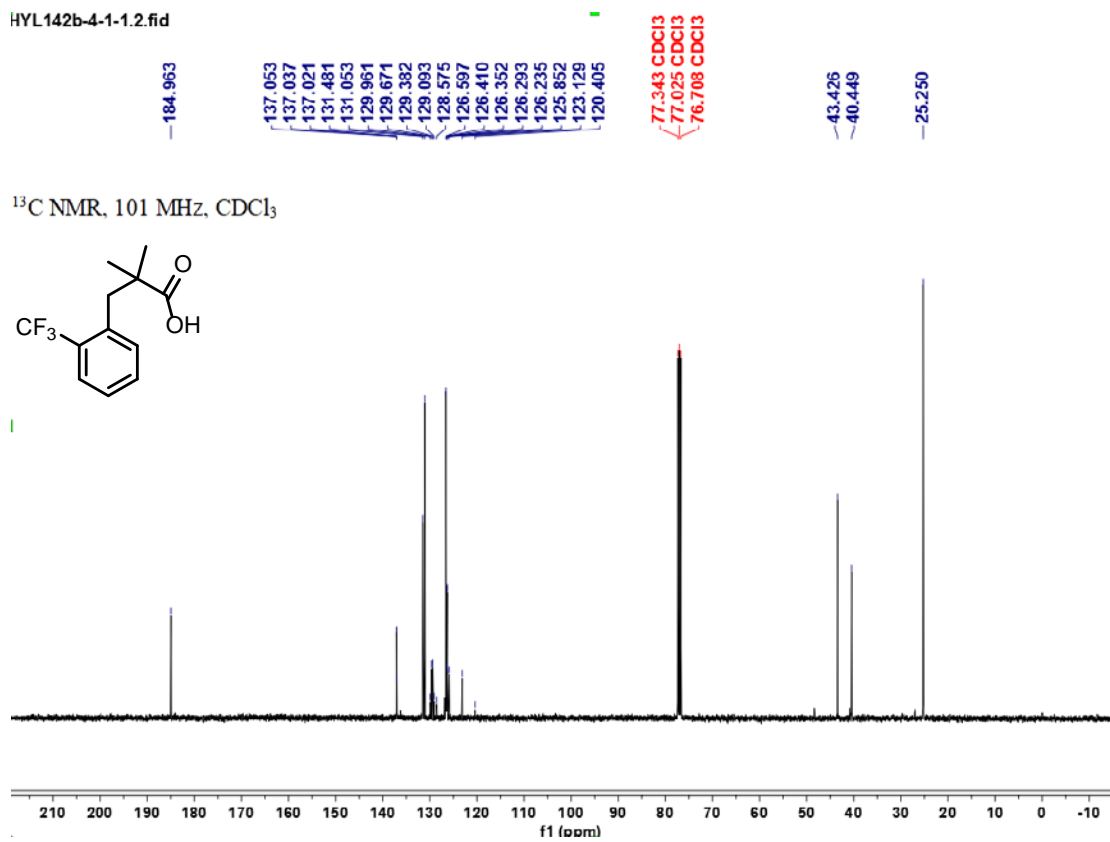

HYL142b-4-1-1-1.1.fid

$^{19}\text{F}$  NMR, 376 MHz,  $\text{CDCl}_3$

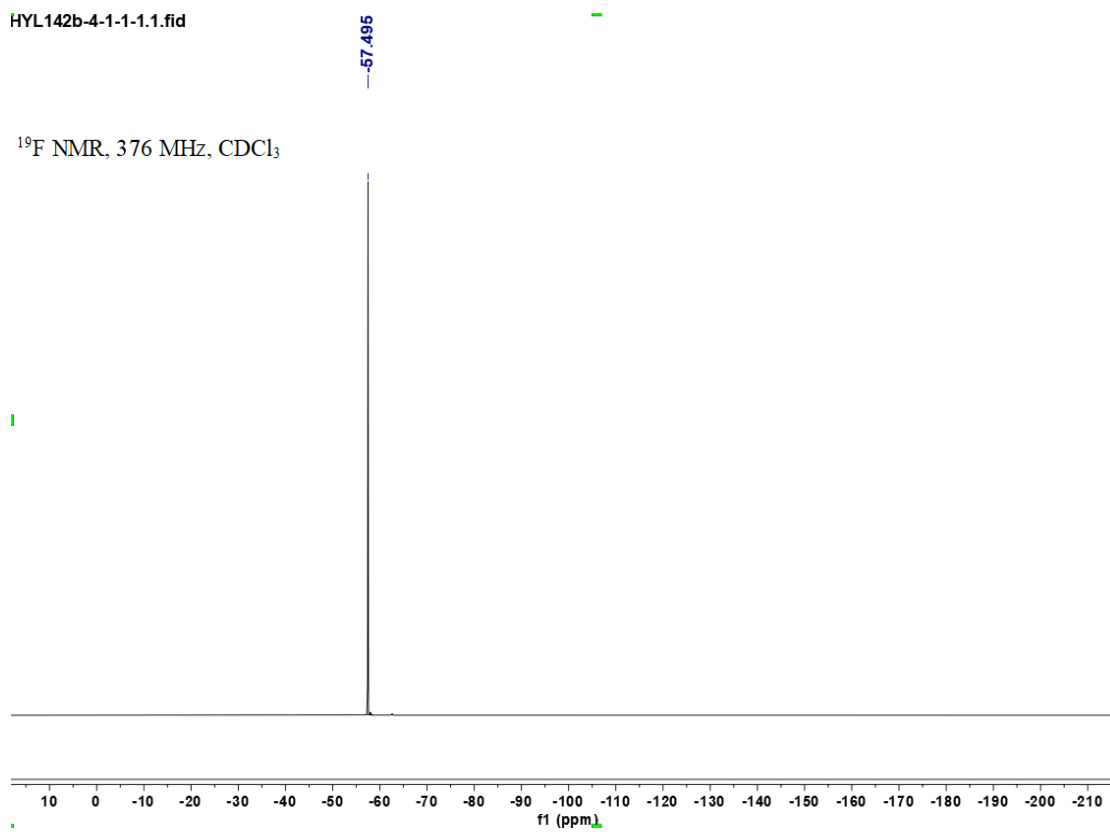

$^1\text{H}$  NMR (400 MHz),  $^{13}\text{C}$  NMR (101 MHz) and  $^{19}\text{F}$  NMR (376 MHz) spectra of **7-53**

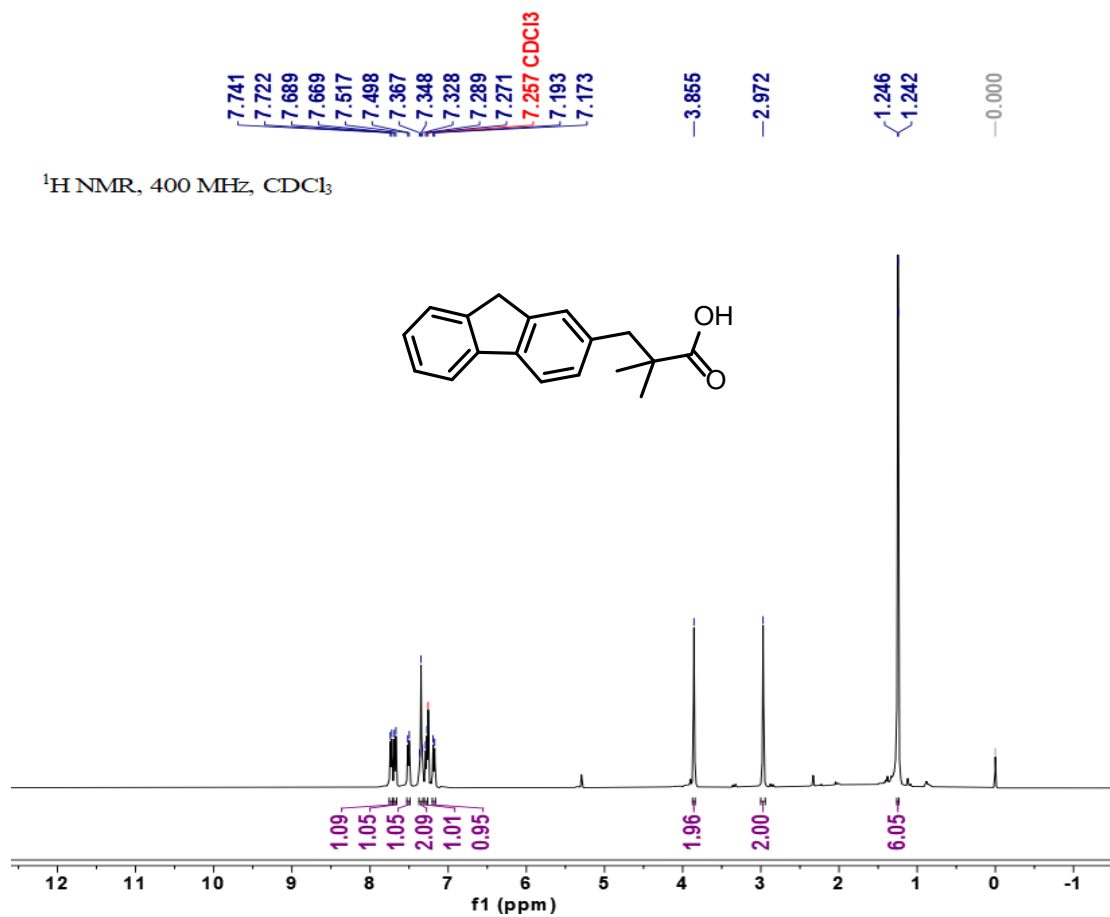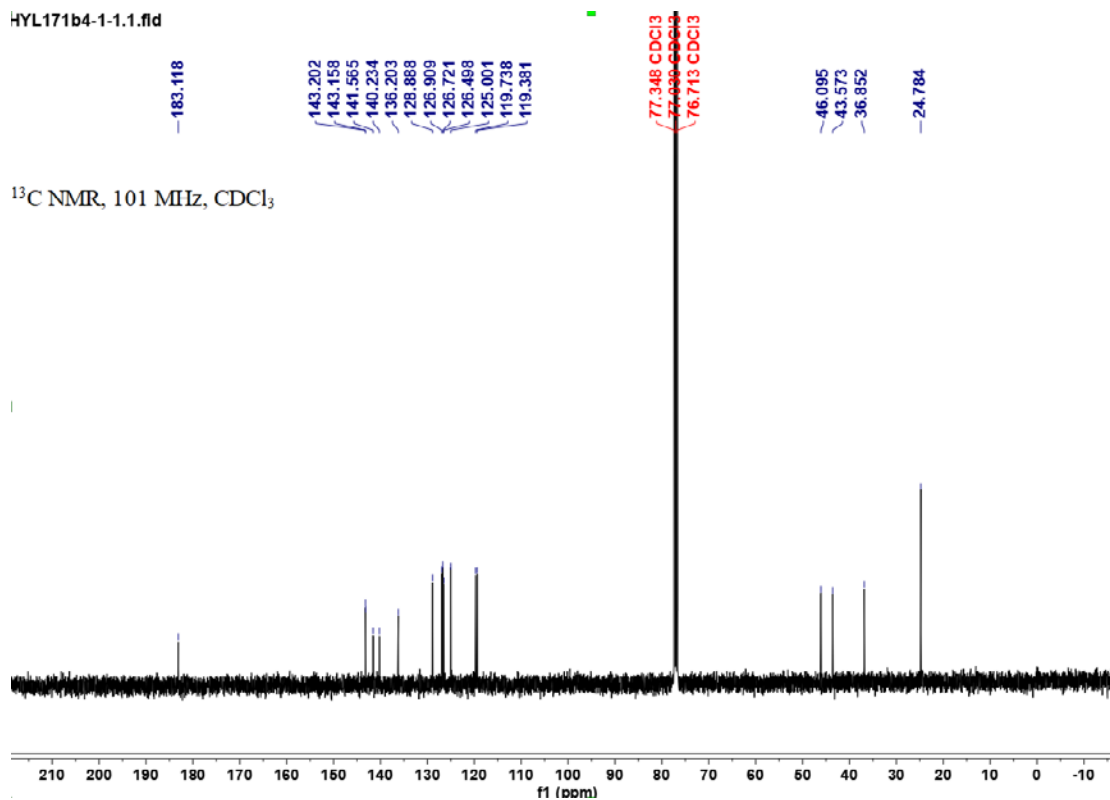

<sup>1</sup>H NMR (400 MHz) and <sup>13</sup>C NMR (101 MHz) spectra of 7-54

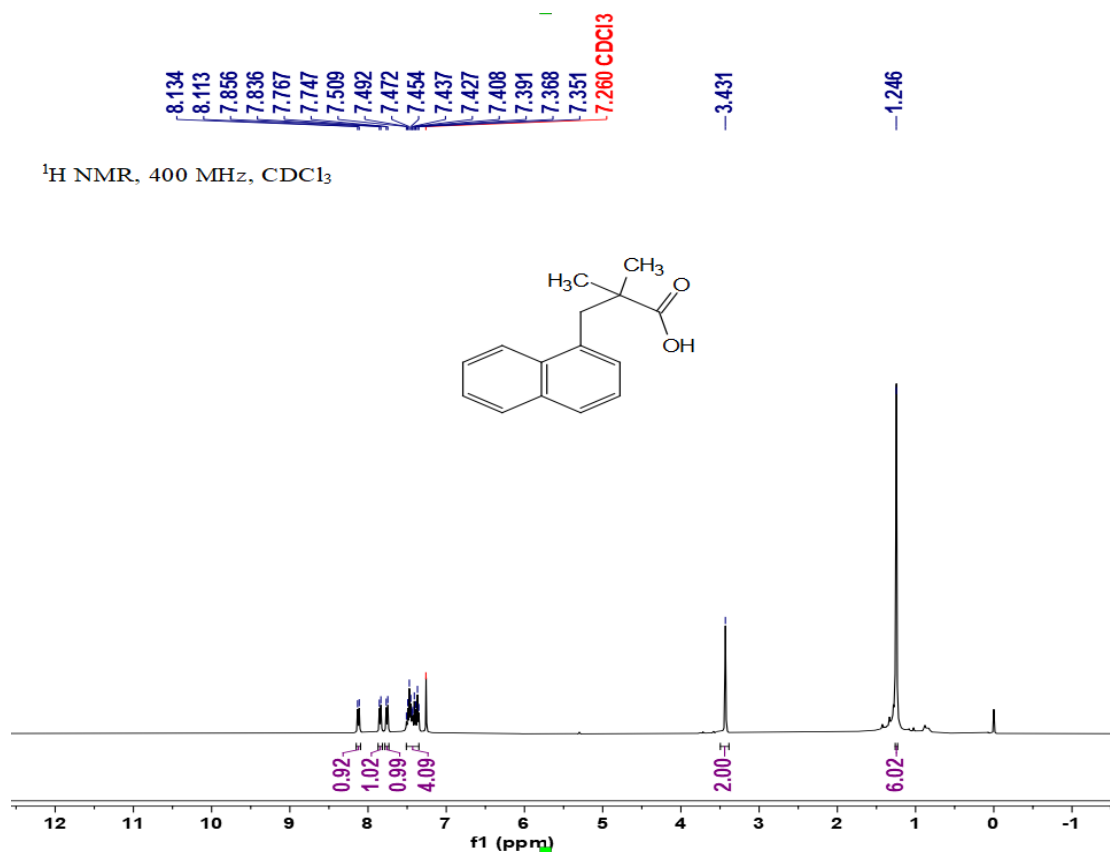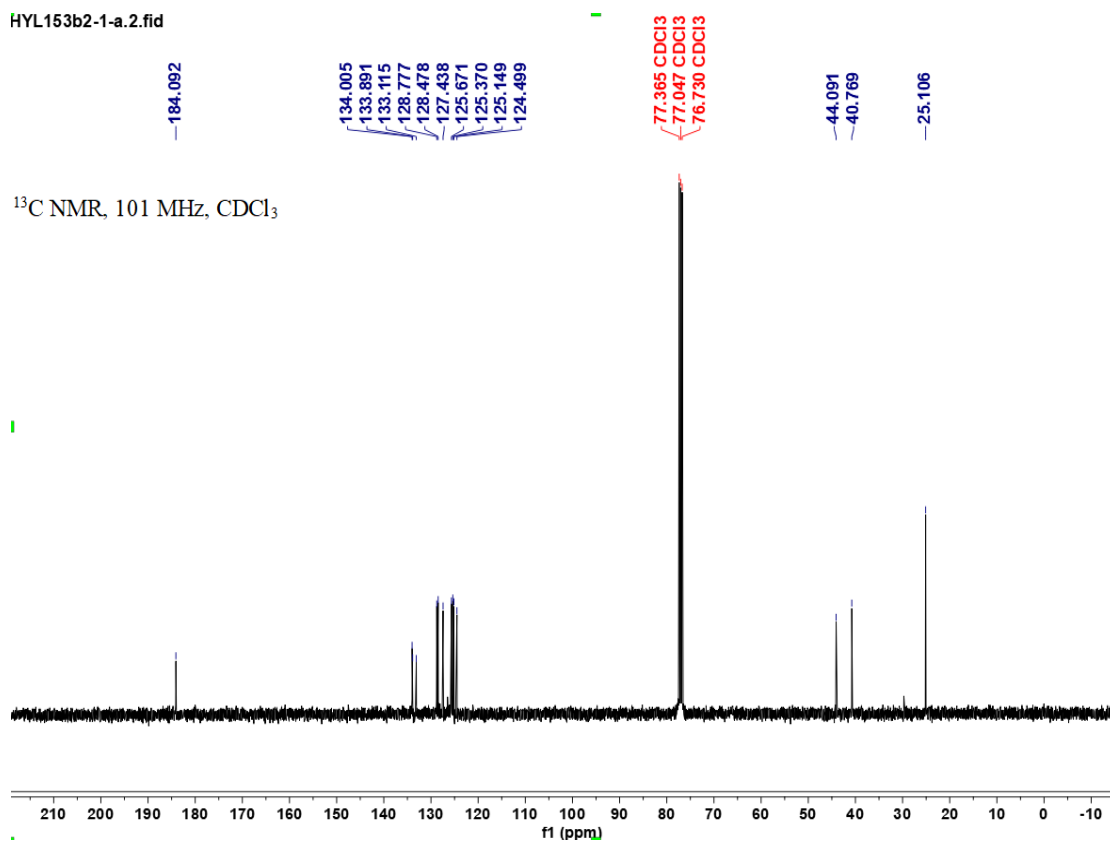

<sup>1</sup>H NMR (400 MHz) and <sup>13</sup>C NMR (101 MHz) spectra of **7-55**

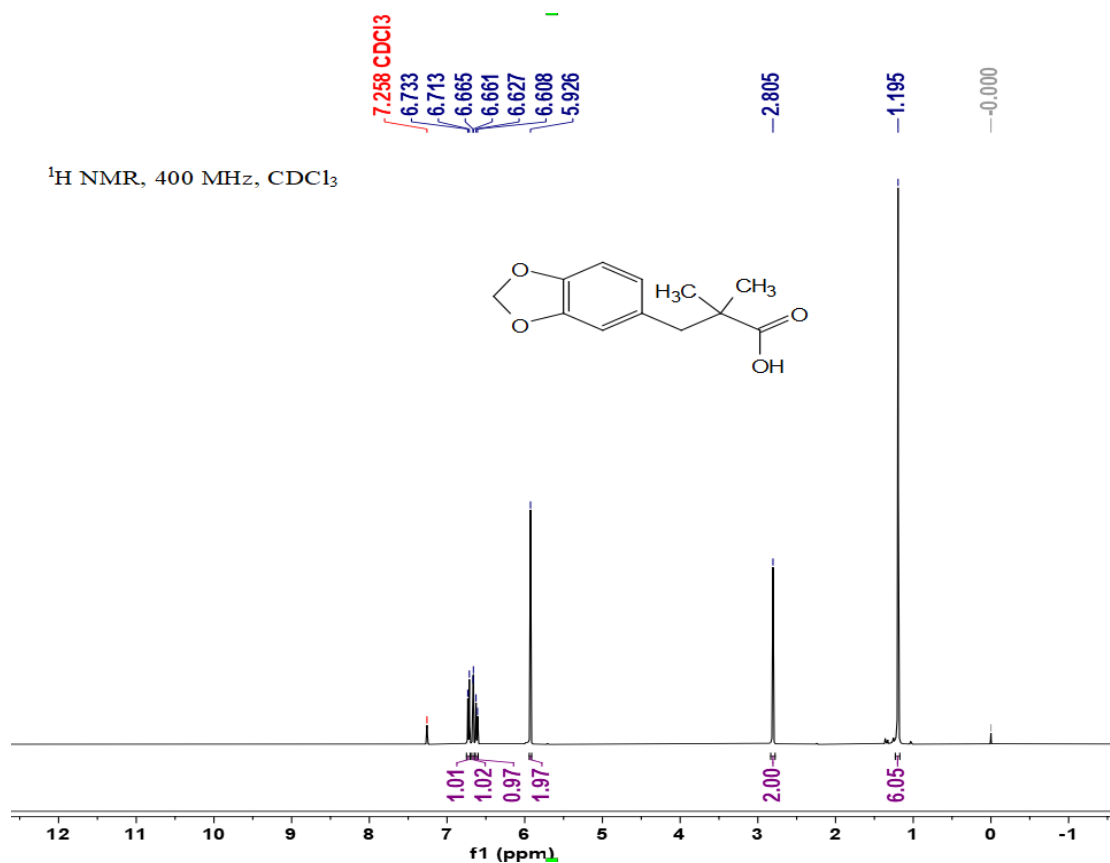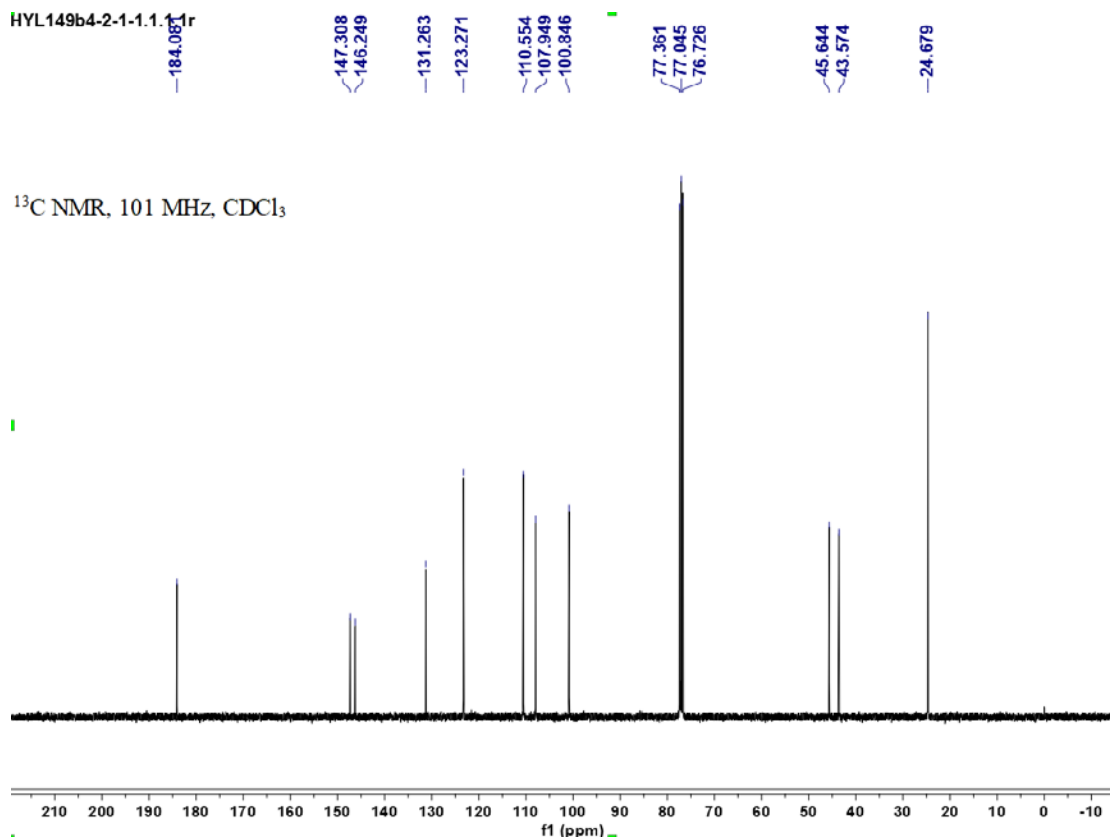

<sup>1</sup>H NMR (400 MHz) and <sup>13</sup>C NMR (101 MHz) spectra of 7-56

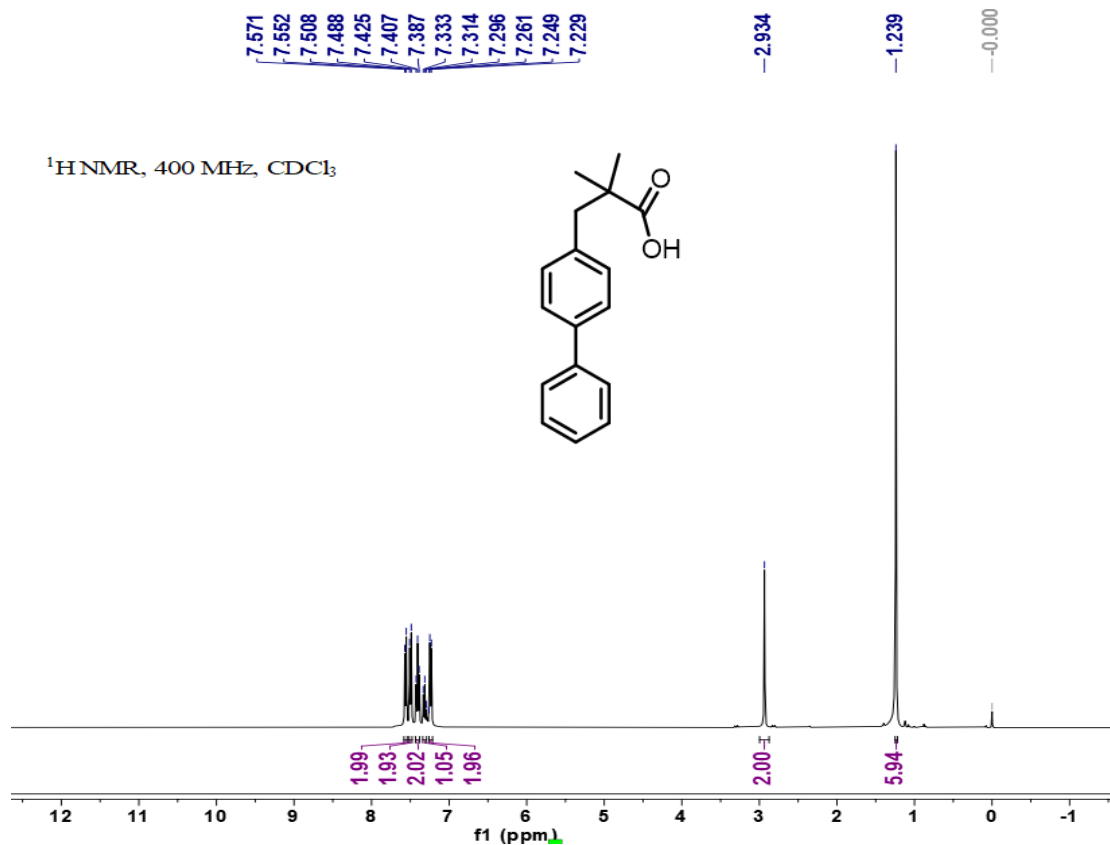

HYL207bb-6-2.2.fid

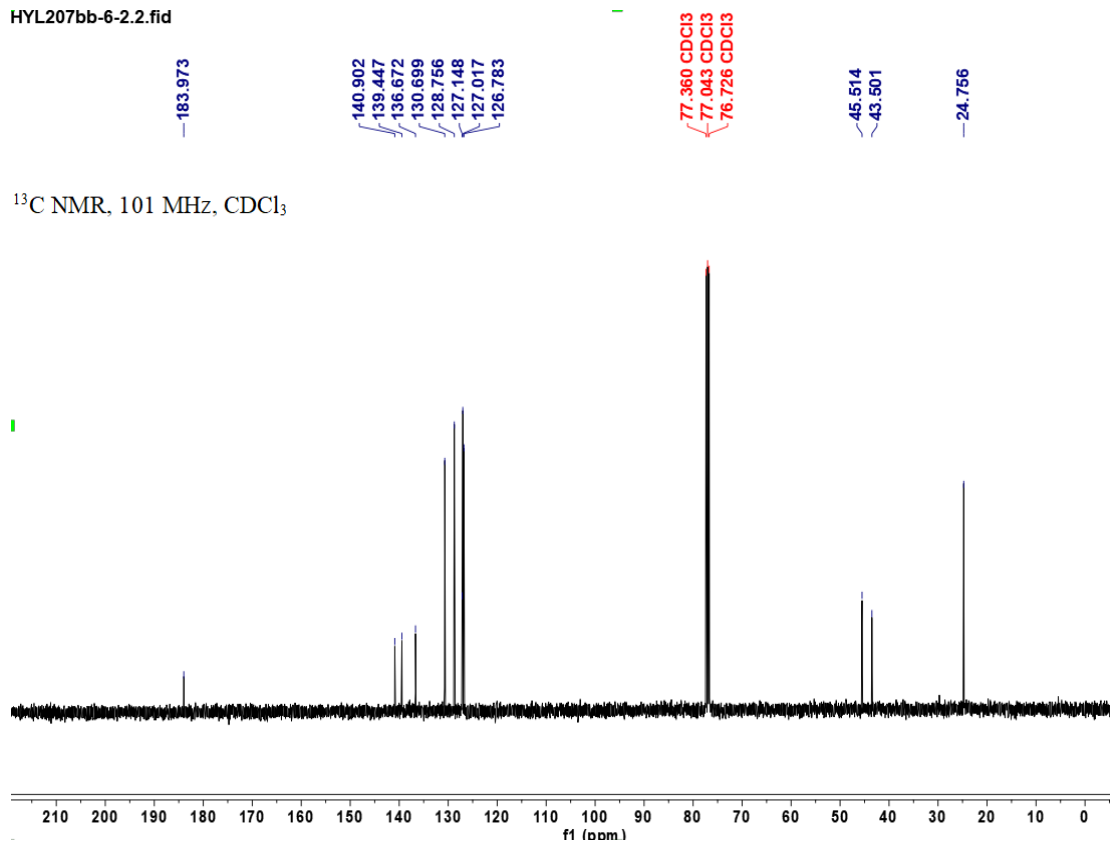

<sup>1</sup>H NMR (400 MHz) and <sup>13</sup>C NMR (101 MHz) spectra of 7-57

b2.1.fid

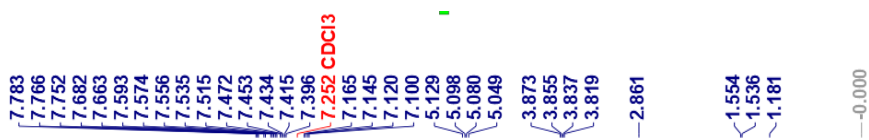

<sup>1</sup>H NMR, 400 MHz, CDCl<sub>3</sub>

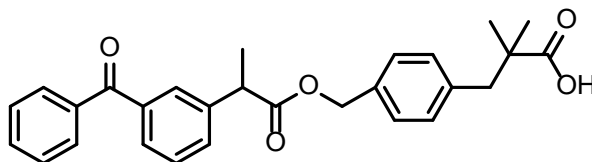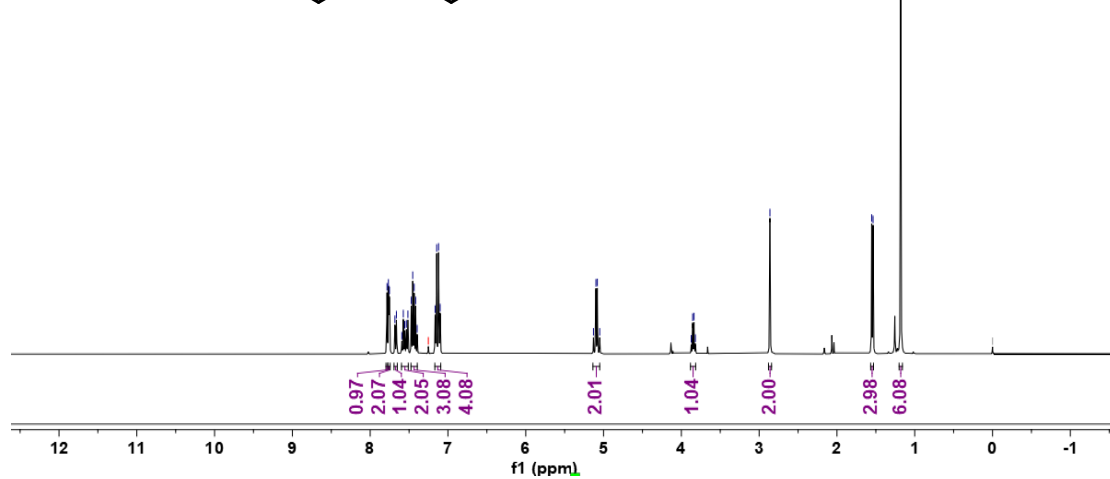

YL233b2.2.fid

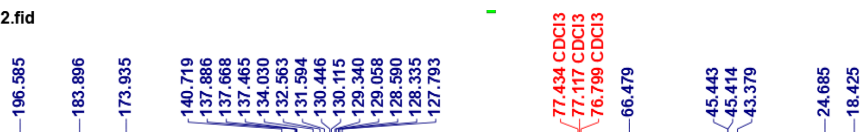

<sup>13</sup>C NMR, 101 MHz, CDCl<sub>3</sub>

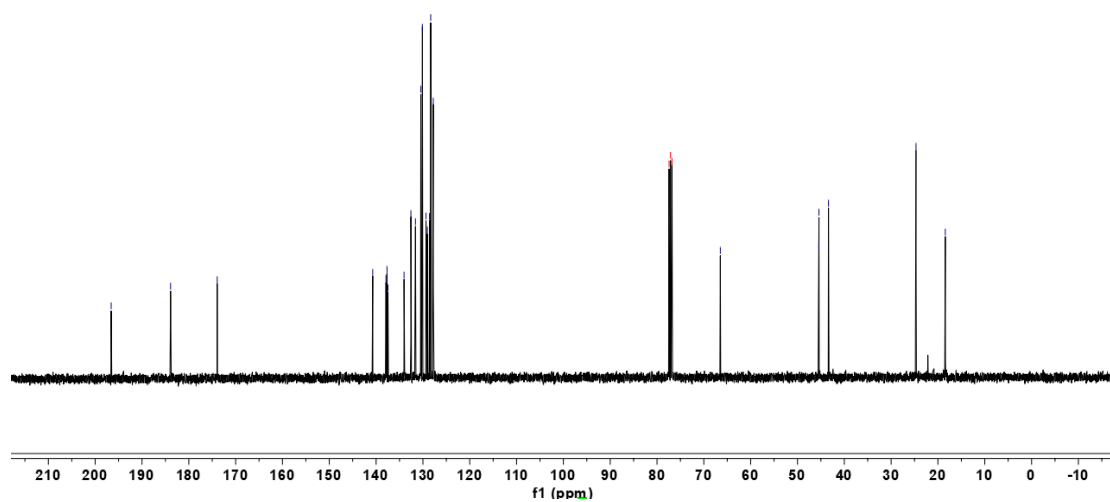

<sup>1</sup>H NMR (400 MHz) and <sup>13</sup>C NMR (101 MHz) spectra of **7-58**

i4-2-11.1.fid

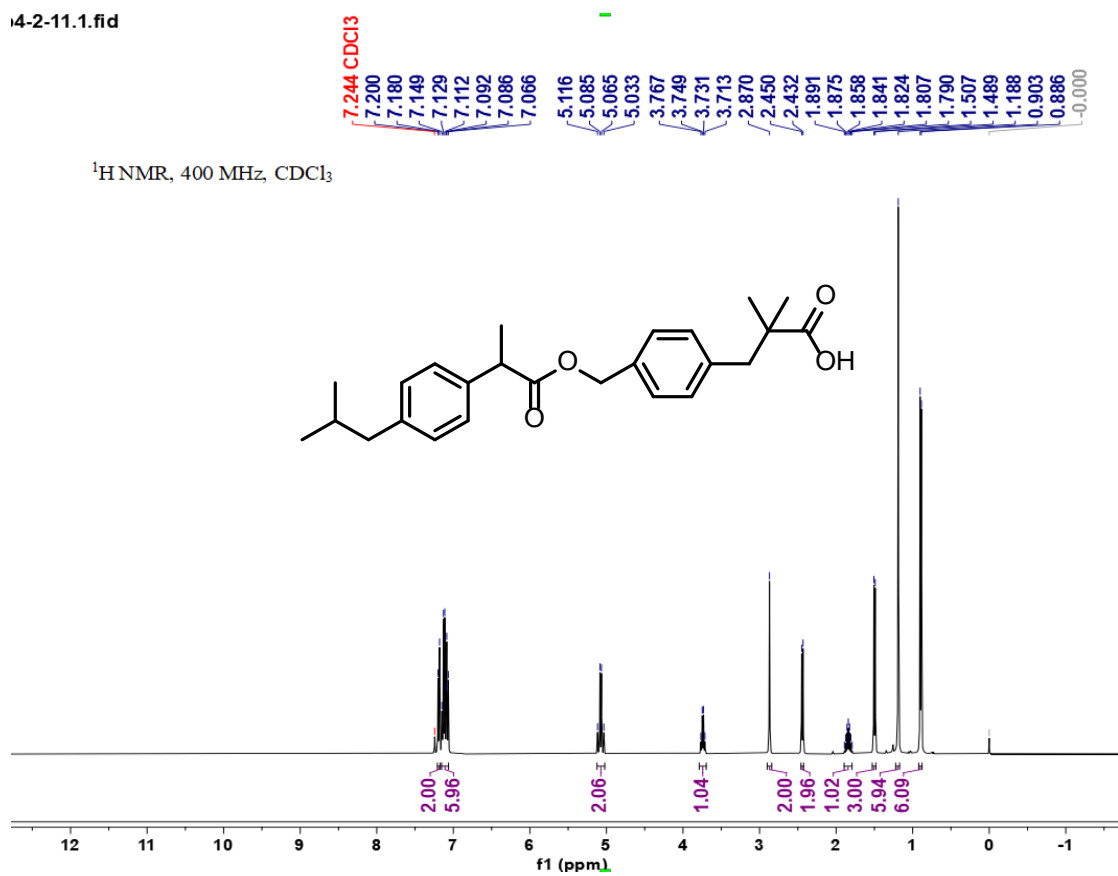

4YL233b4-2-11.2.fid

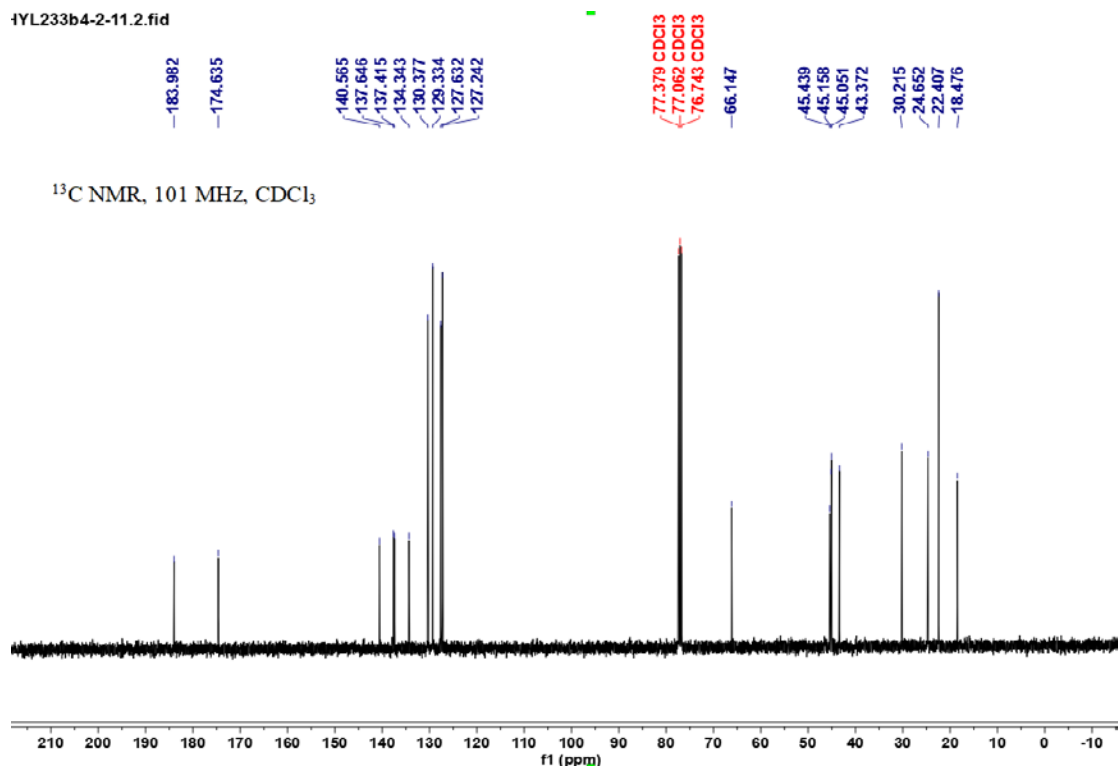

<sup>1</sup>H NMR (400 MHz) and <sup>13</sup>C NMR (101 MHz) spectra of **7-59**



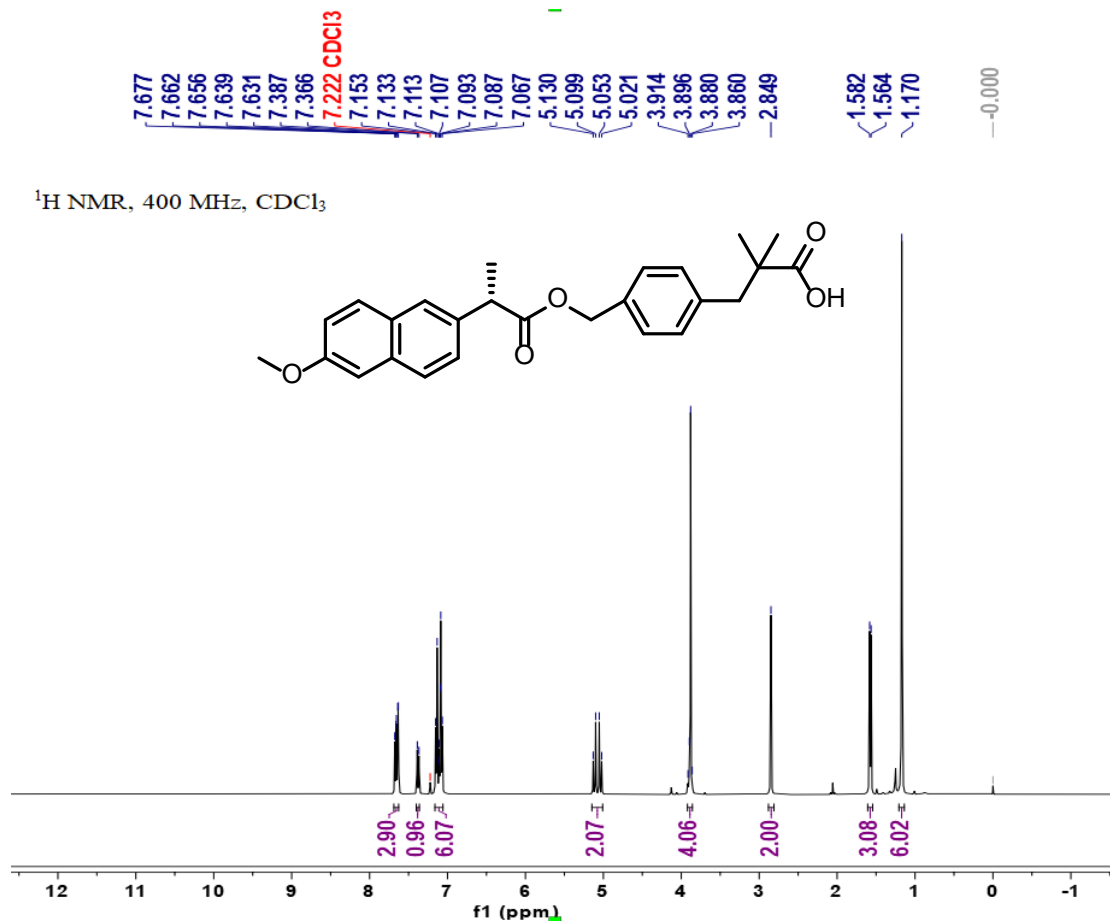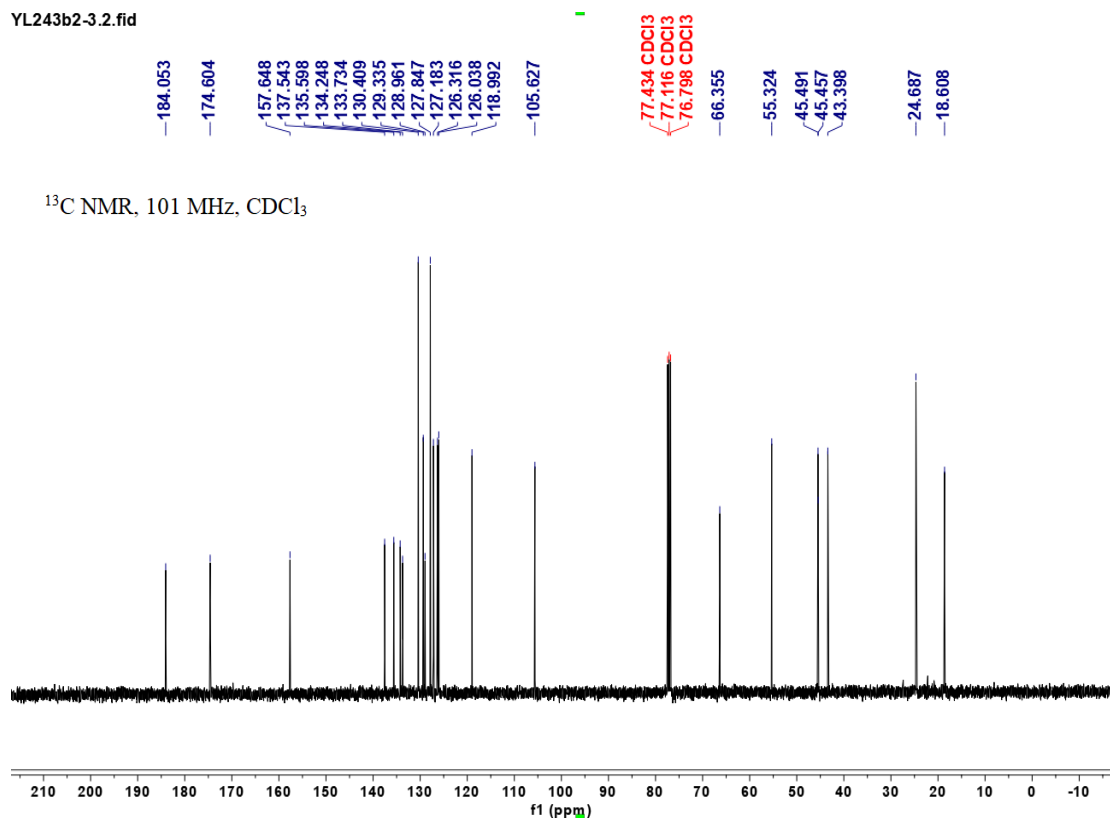

<sup>1</sup>H NMR (400 MHz) and <sup>13</sup>C NMR (101 MHz) spectra of 7-60

HYL243b4-1.1.fid

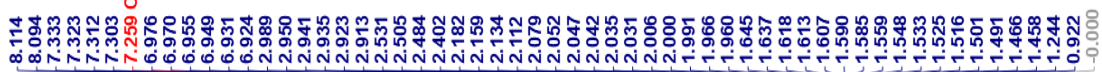

<sup>1</sup>H NMR, 400 MHz, CDCl<sub>3</sub>

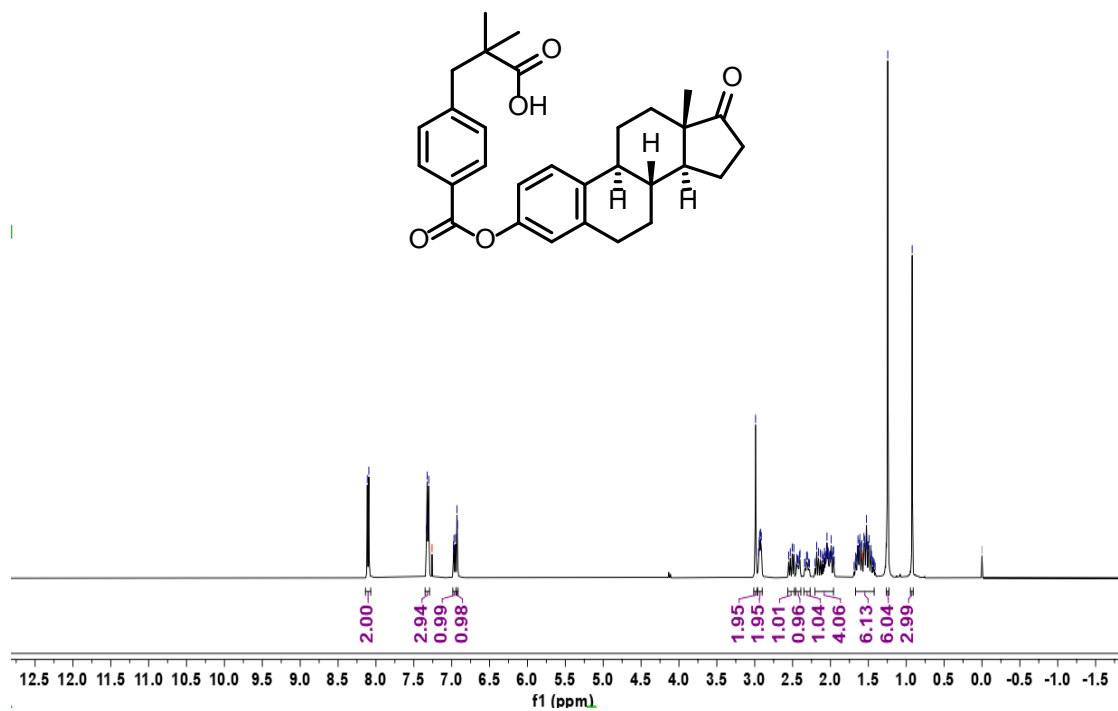

HYL243b4-2-1.1.fid

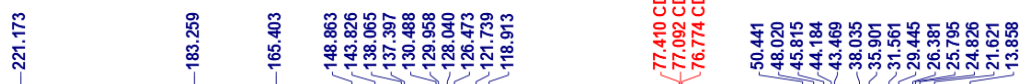

<sup>13</sup>C NMR, 101 MHz, CDCl<sub>3</sub>

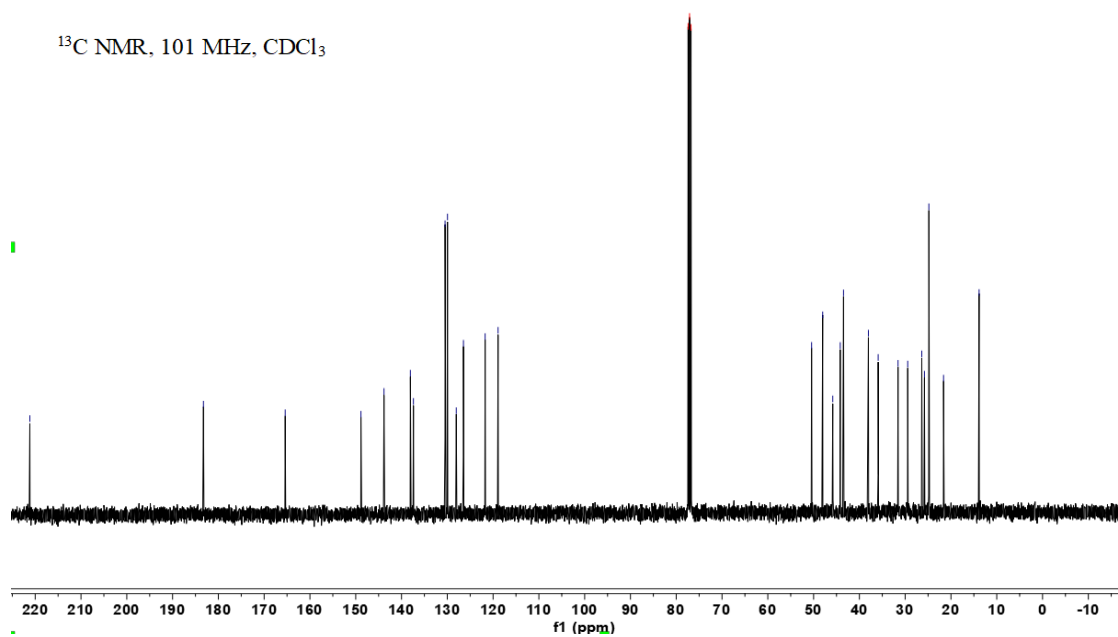

<sup>1</sup>H NMR (400 MHz) and <sup>13</sup>C NMR (101 MHz) spectra of 7-61

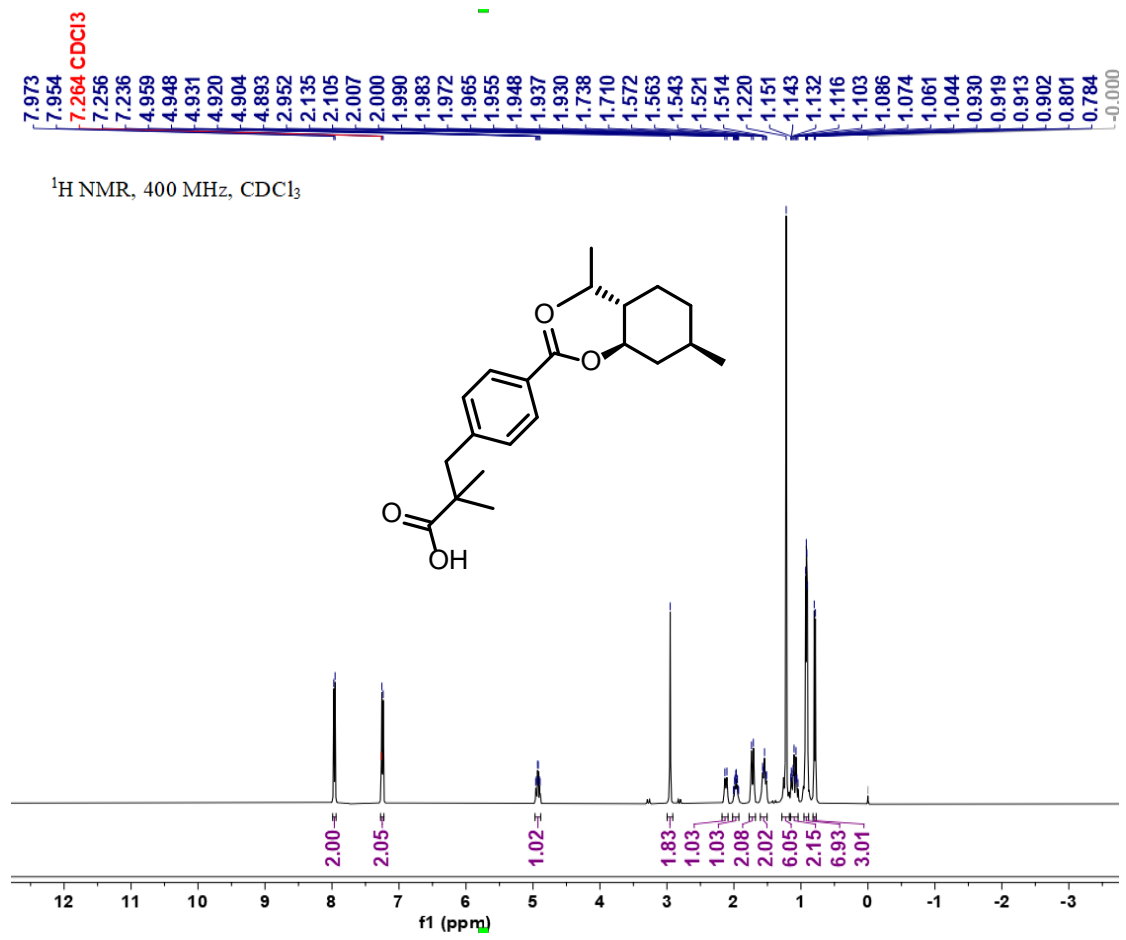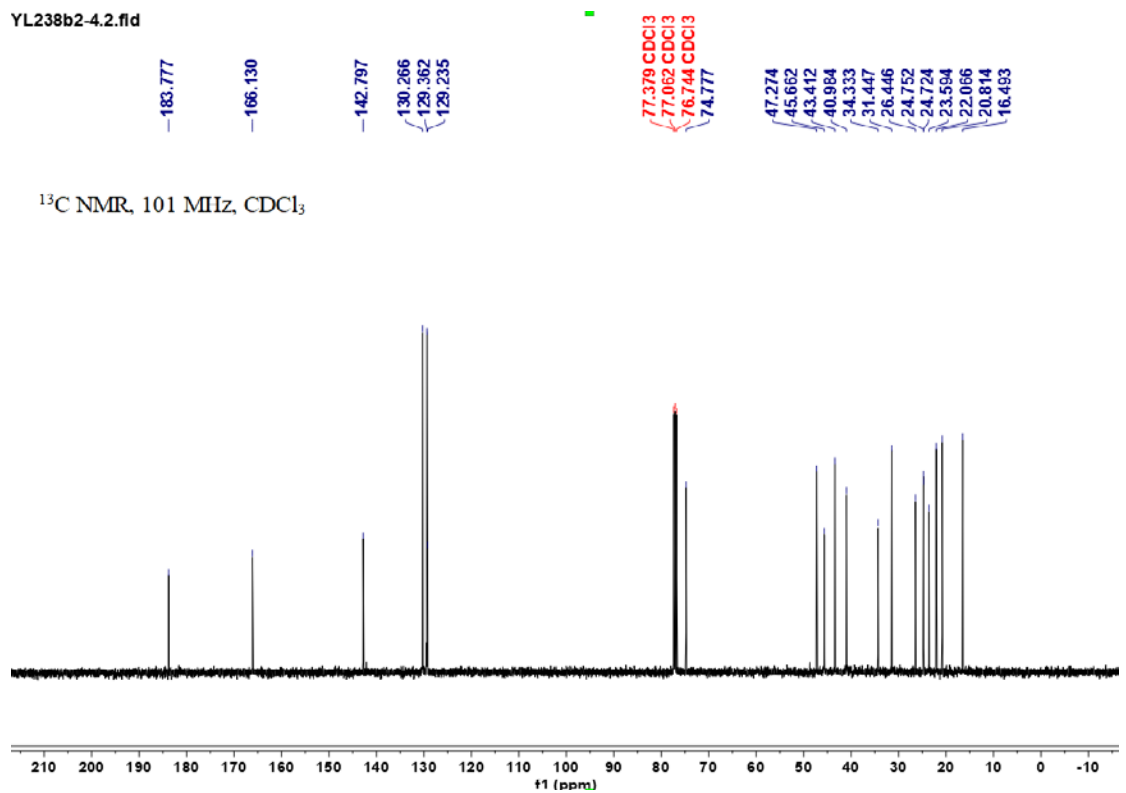

<sup>1</sup>H NMR (400 MHz) and <sup>13</sup>C NMR (101 MHz) spectra of 7-62

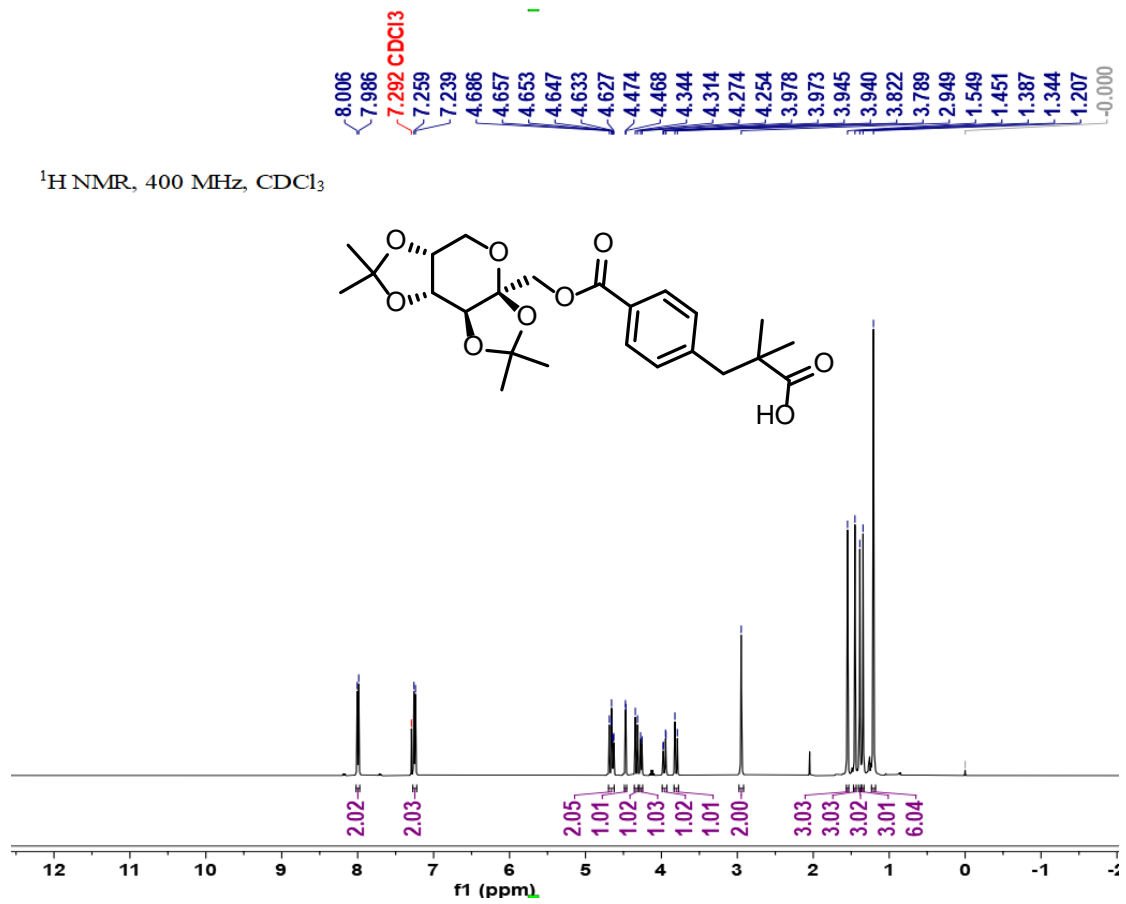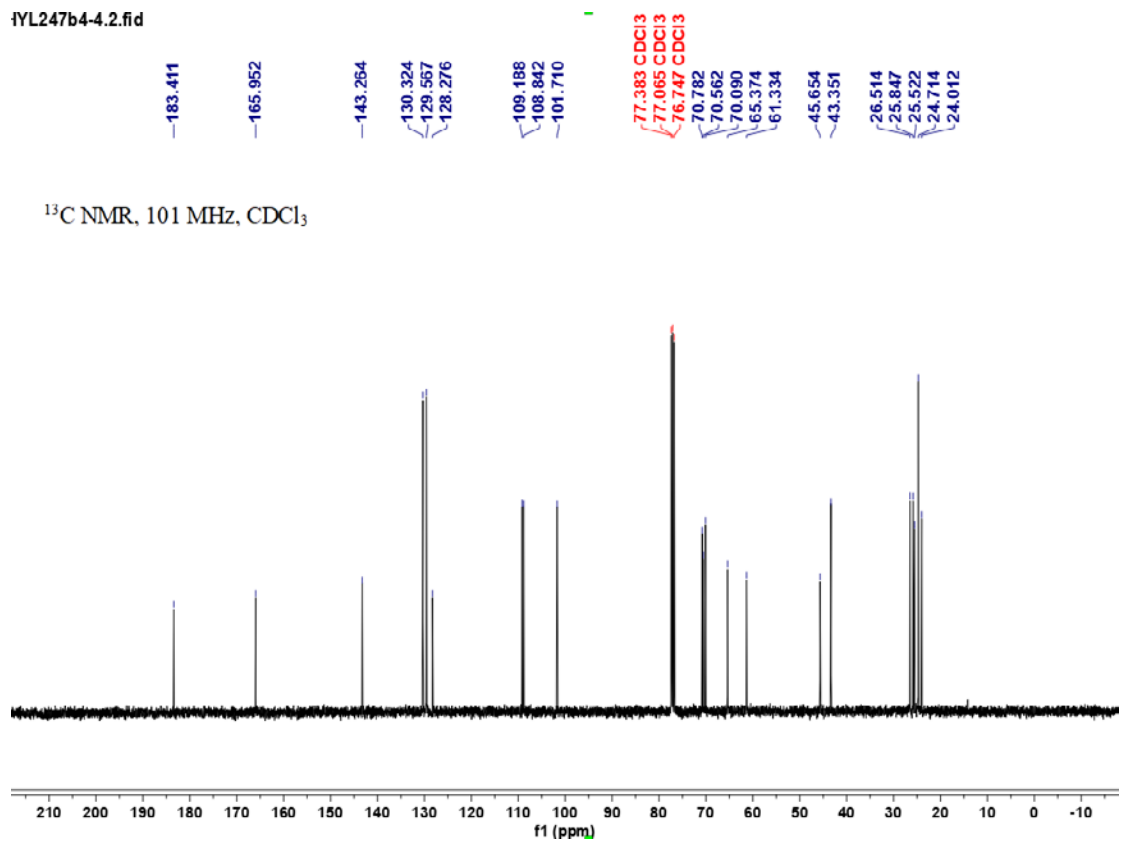

<sup>1</sup>H NMR (400 MHz) and <sup>13</sup>C NMR (101 MHz) spectra of 7-63

YL244bb3-1.1.fid

7.997  
7.977  
7.275  
7.255  
4.611  
2.962  
1.968  
1.963  
1.954  
1.947  
1.940  
1.932  
1.925  
1.916  
1.910  
1.900  
1.895  
1.810  
1.803  
1.780  
1.771  
1.749  
1.741  
1.677  
1.651  
1.552  
1.542  
1.528  
1.521  
1.507  
1.497  
1.490  
1.476  
1.465  
1.258  
1.244  
1.229  
1.182  
1.106  
0.845  
0.000

$^1\text{H}$  NMR, 400 MHz,  $\text{CDCl}_3$

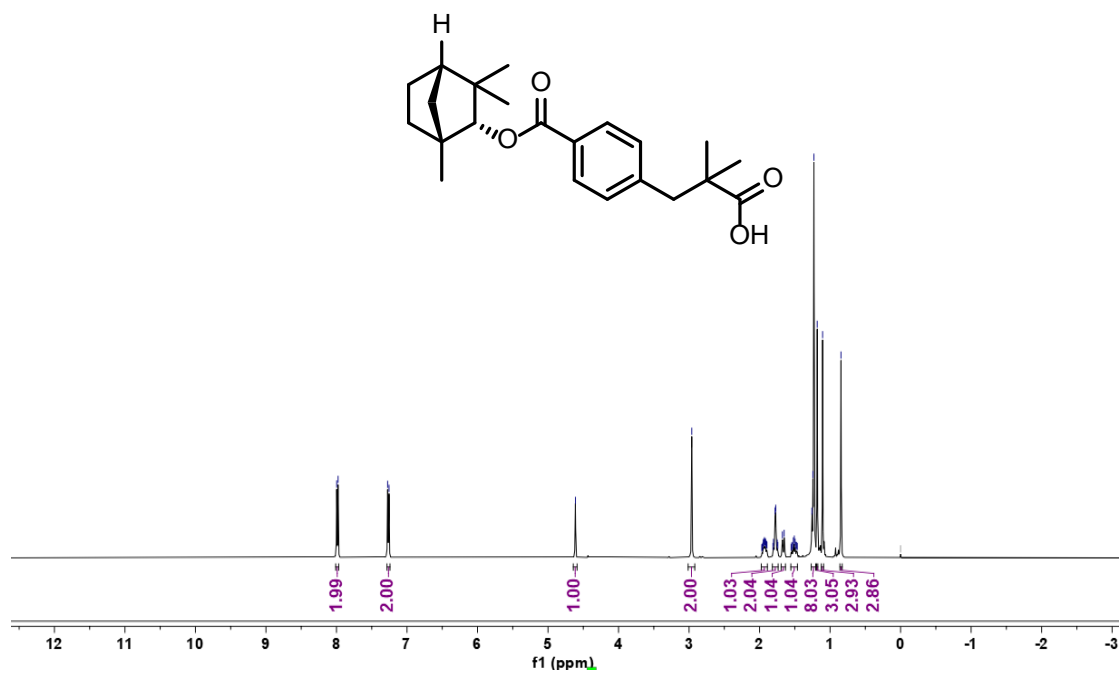

YL244bb3-1.2.fid

183.866  
166.911  
142.903  
130.356  
129.345  
129.061  
86.633  
77.393  $\text{CDCl}_3$   
77.075  $\text{CDCl}_3$   
76.756  $\text{CDCl}_3$   
48.637  
48.429  
45.647  
43.419  
41.474  
39.846  
29.763  
26.895  
25.937  
24.754  
24.738  
20.351  
19.524

$^{13}\text{C}$  NMR, 101 MHz,  $\text{CDCl}_3$

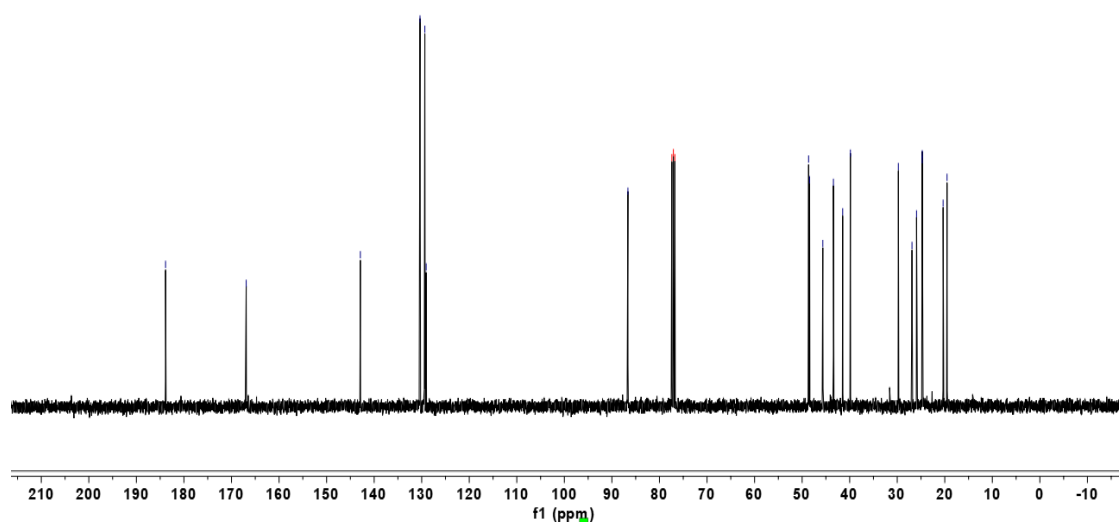

$^1\text{H}$  NMR (400 MHz) and  $^{13}\text{C}$  NMR (101 MHz) spectra of **7-64**

HYL255bb5-1.1.fid

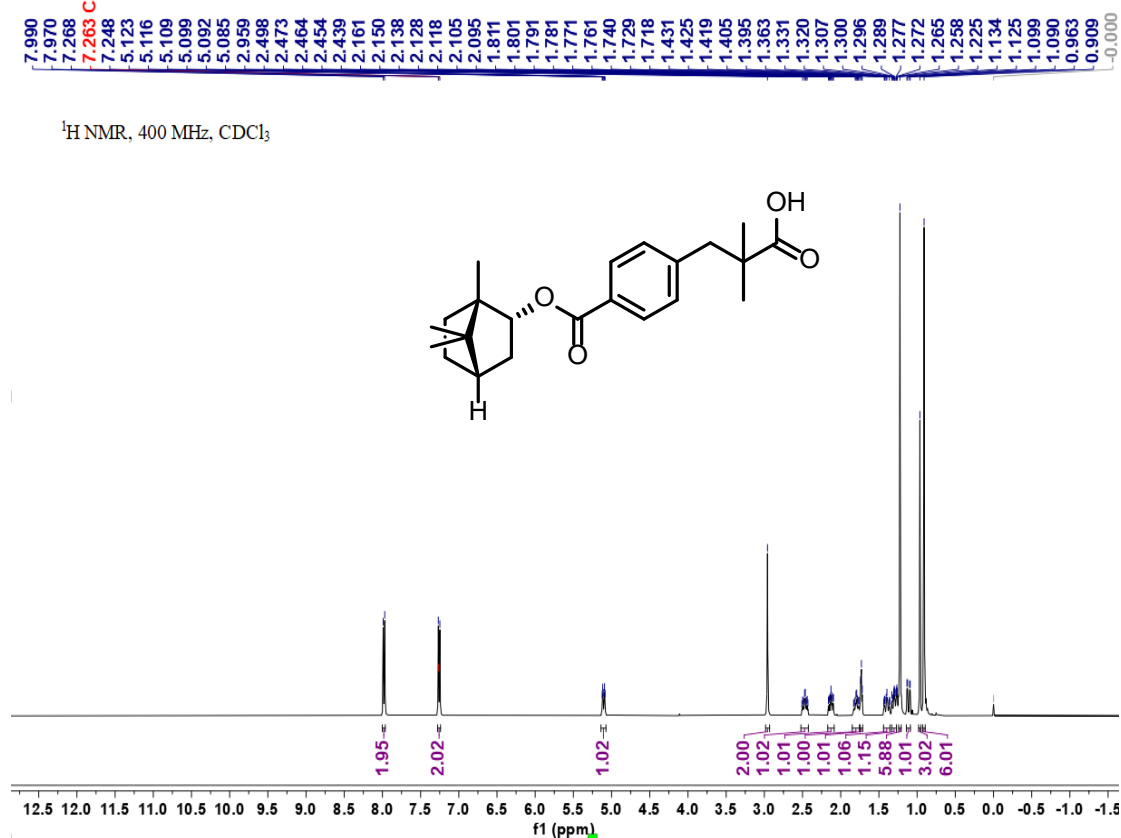

YL255bb5-1.2.fid

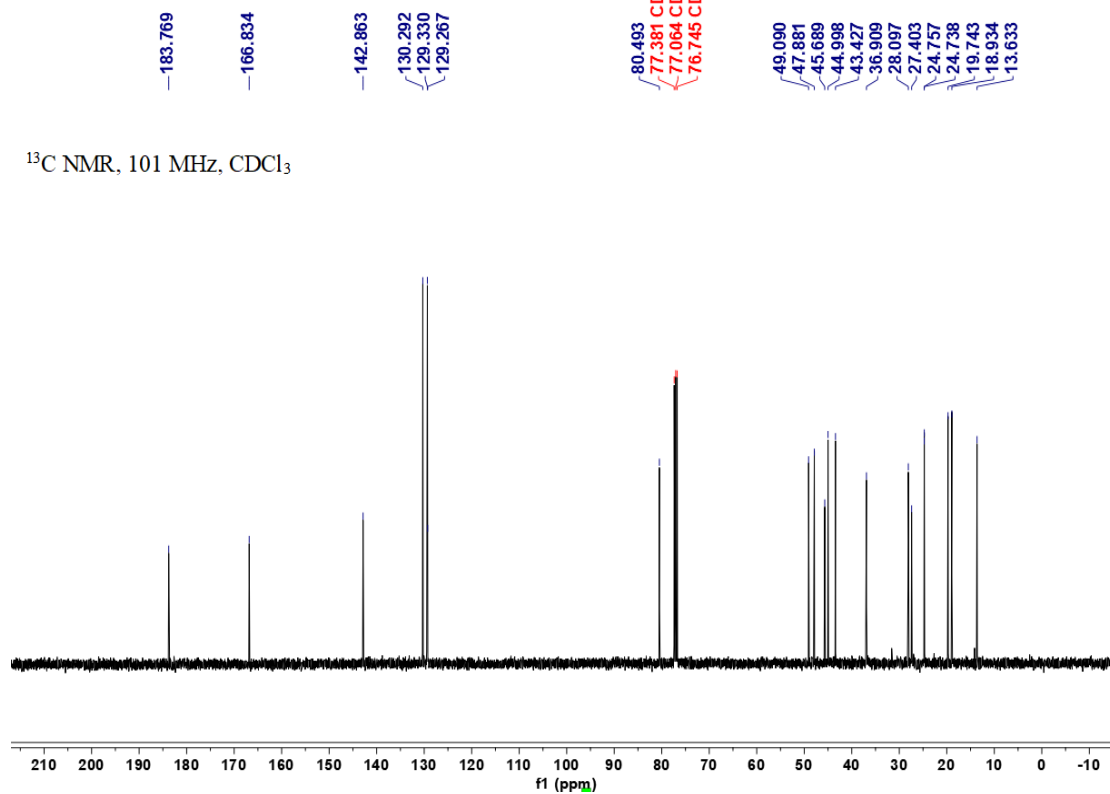

<sup>1</sup>H NMR (400 MHz) and <sup>13</sup>C NMR (101 MHz) spectra of 7-65

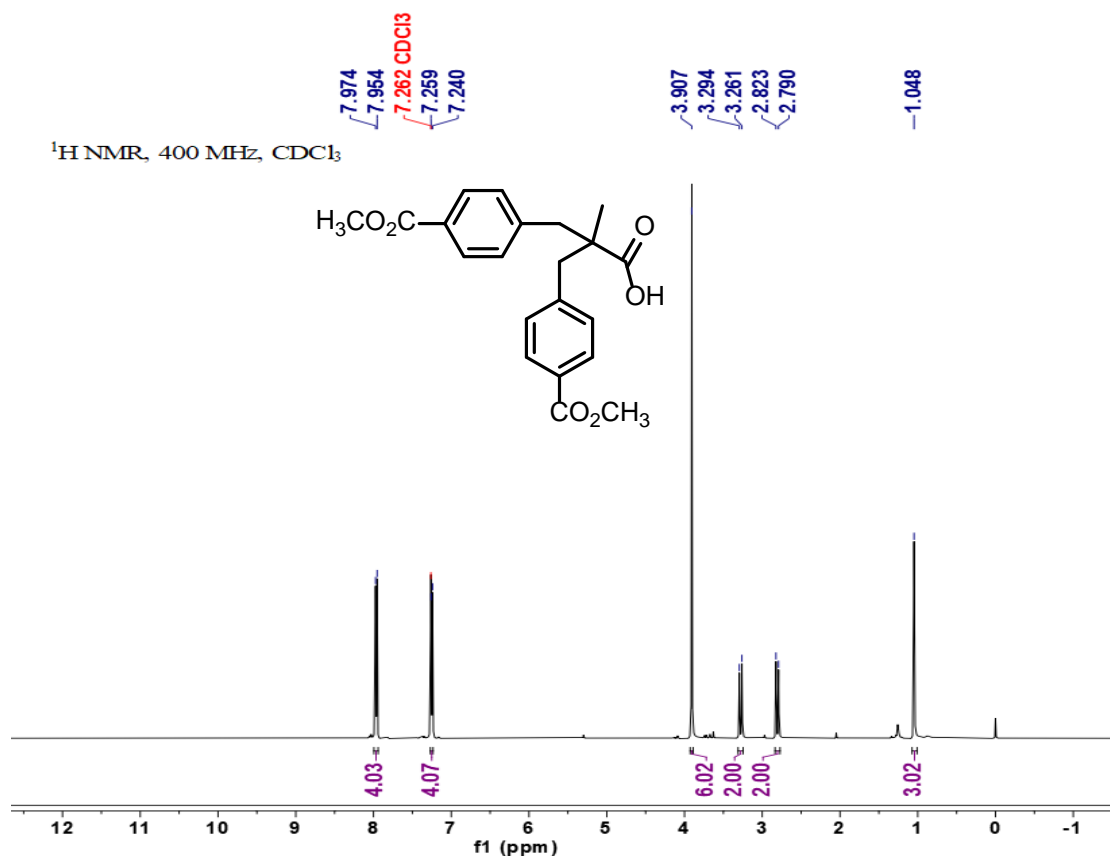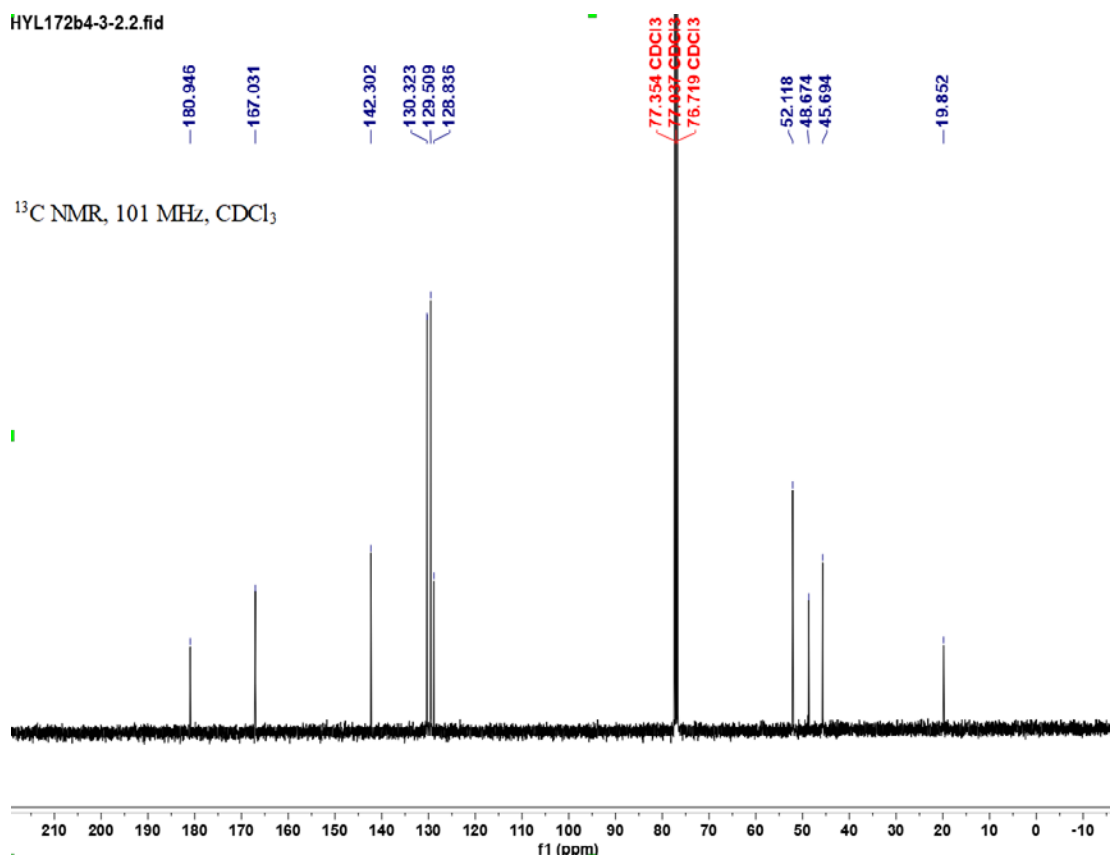

<sup>1</sup>H NMR (400 MHz) and <sup>13</sup>C NMR (101 MHz) spectra of **8-1**

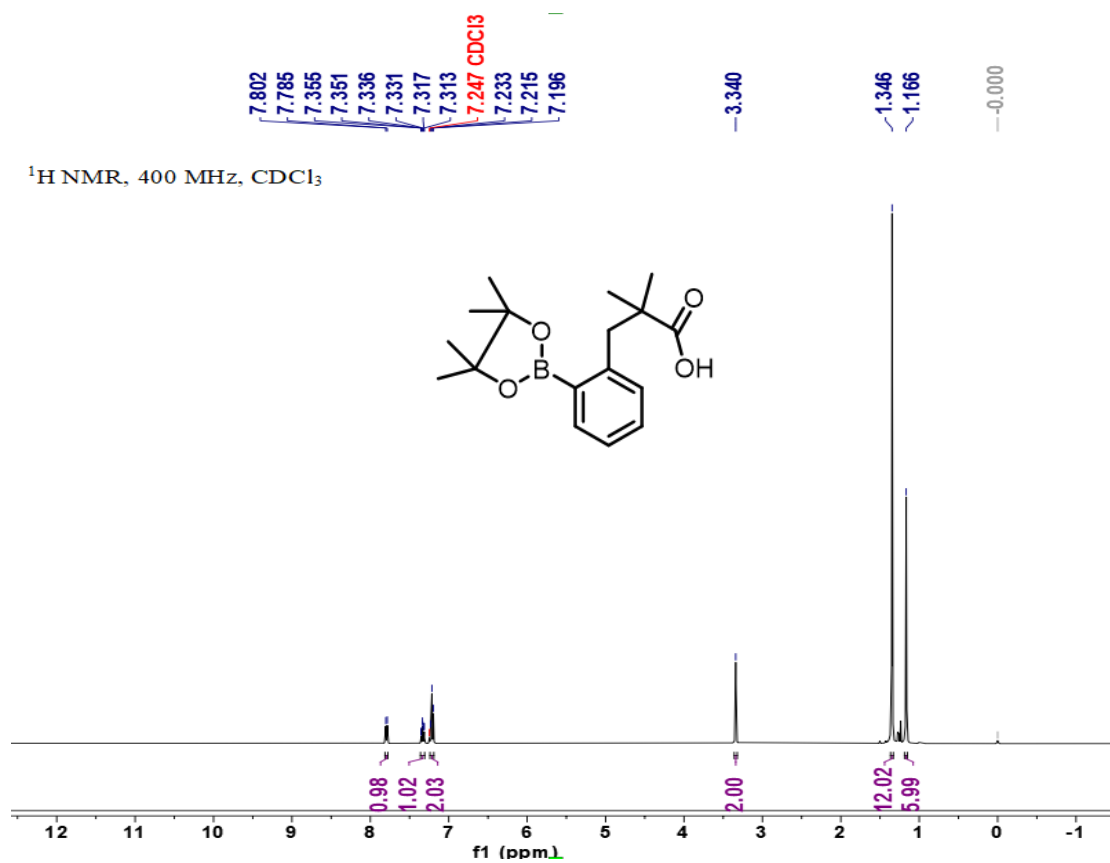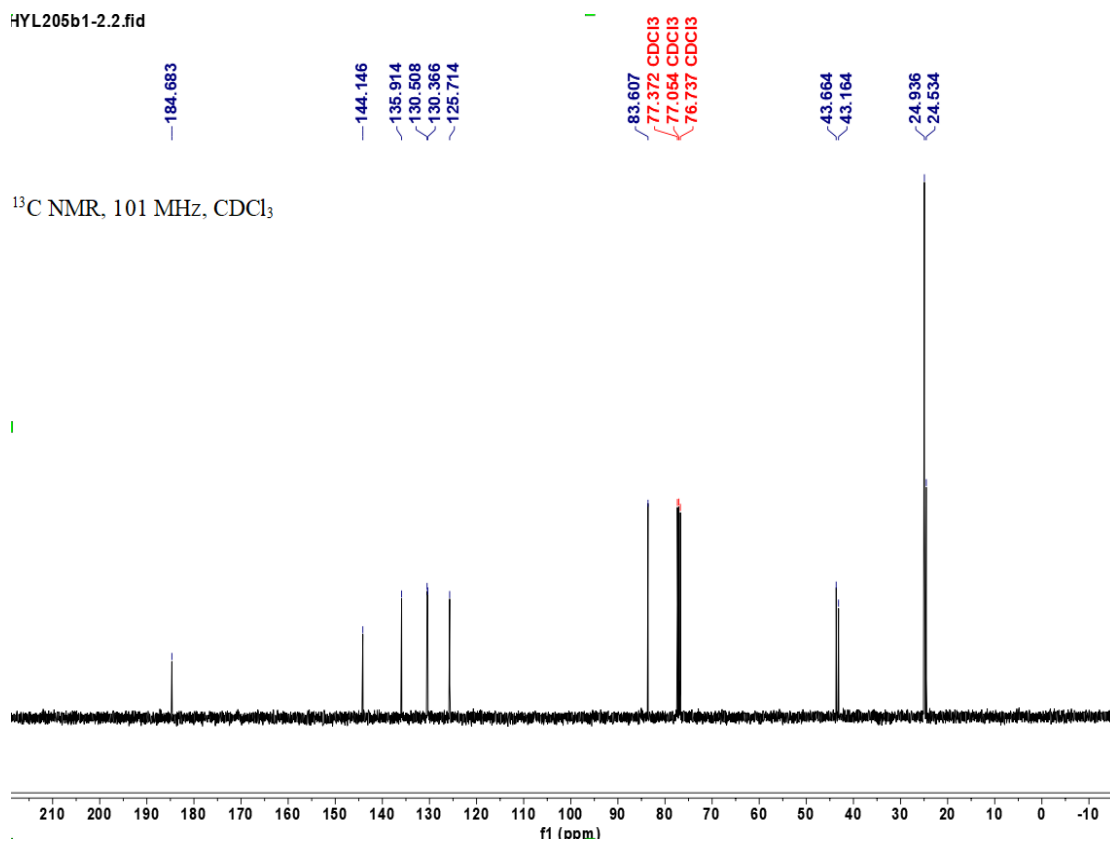

<sup>1</sup>H NMR (400 MHz) and <sup>13</sup>C NMR (101 MHz) spectra of ROS sensitive-4



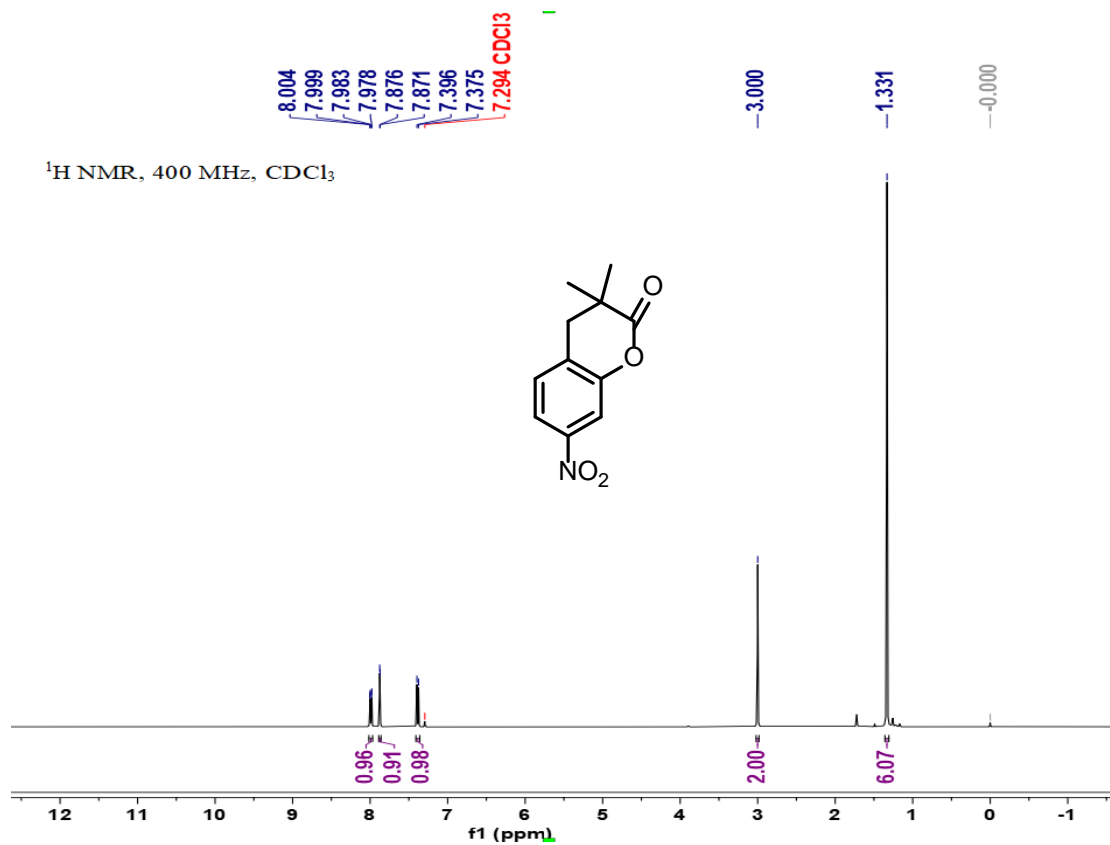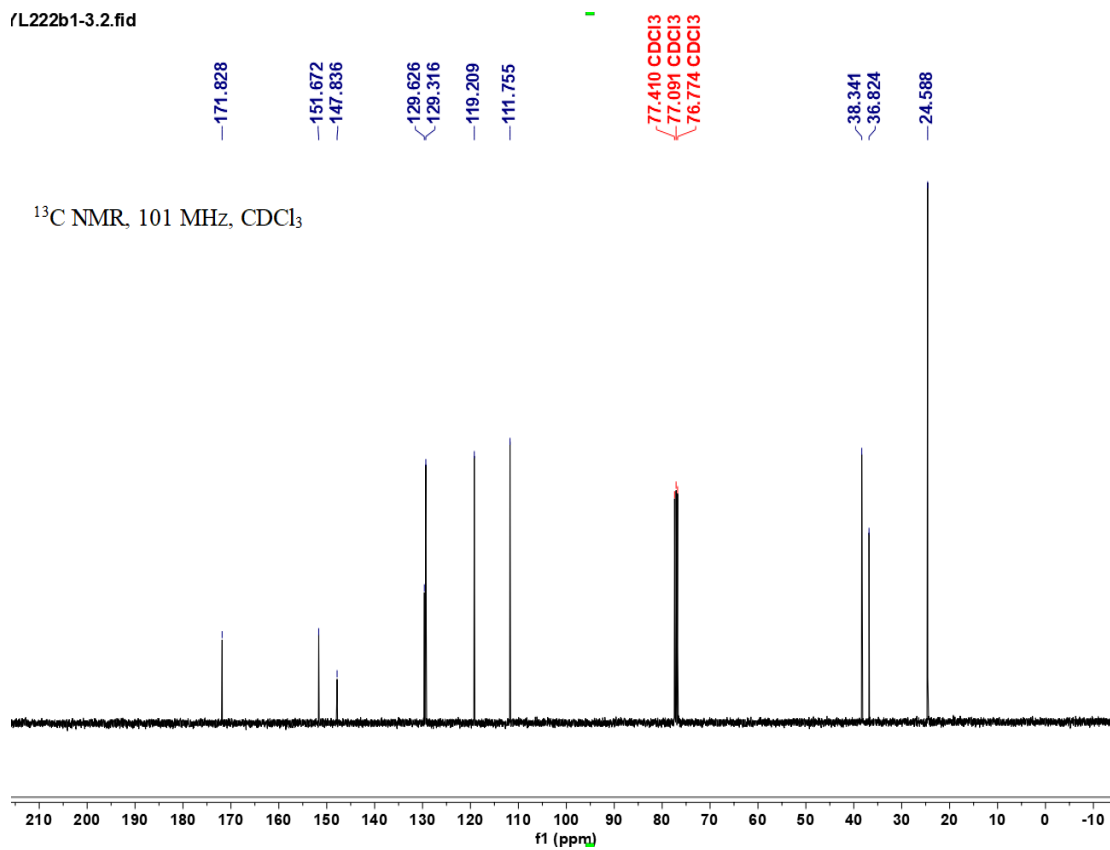

<sup>1</sup>H NMR (400 MHz) and <sup>13</sup>C NMR (101 MHz) spectra of **9**

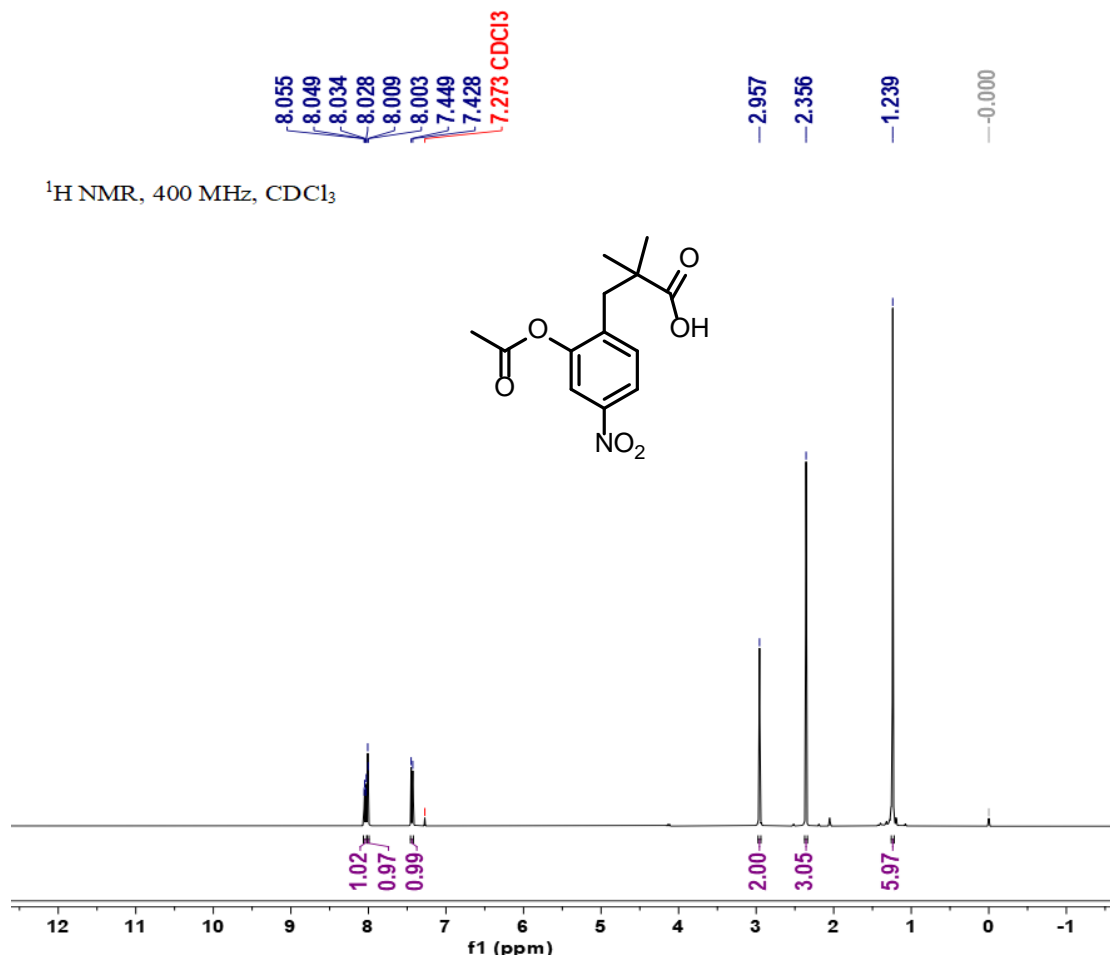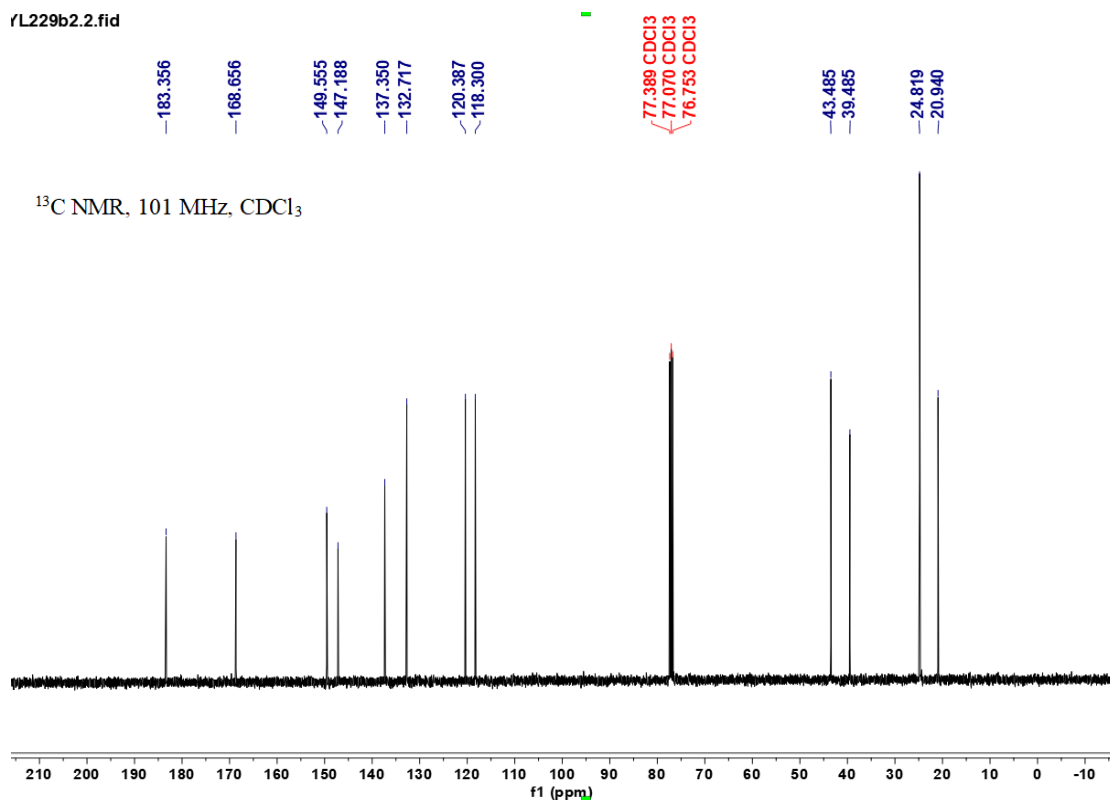

<sup>1</sup>H NMR (400 MHz) and <sup>13</sup>C NMR (101 MHz) spectra of esterase sensitive-10

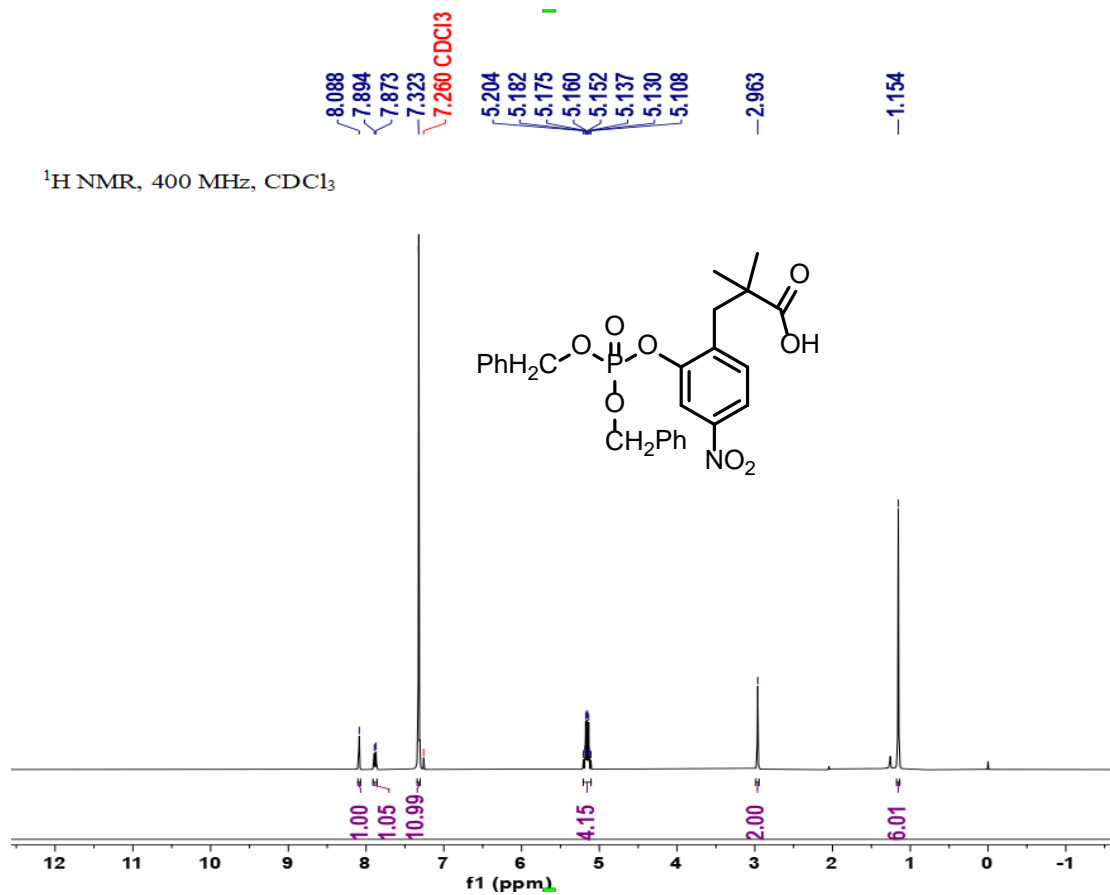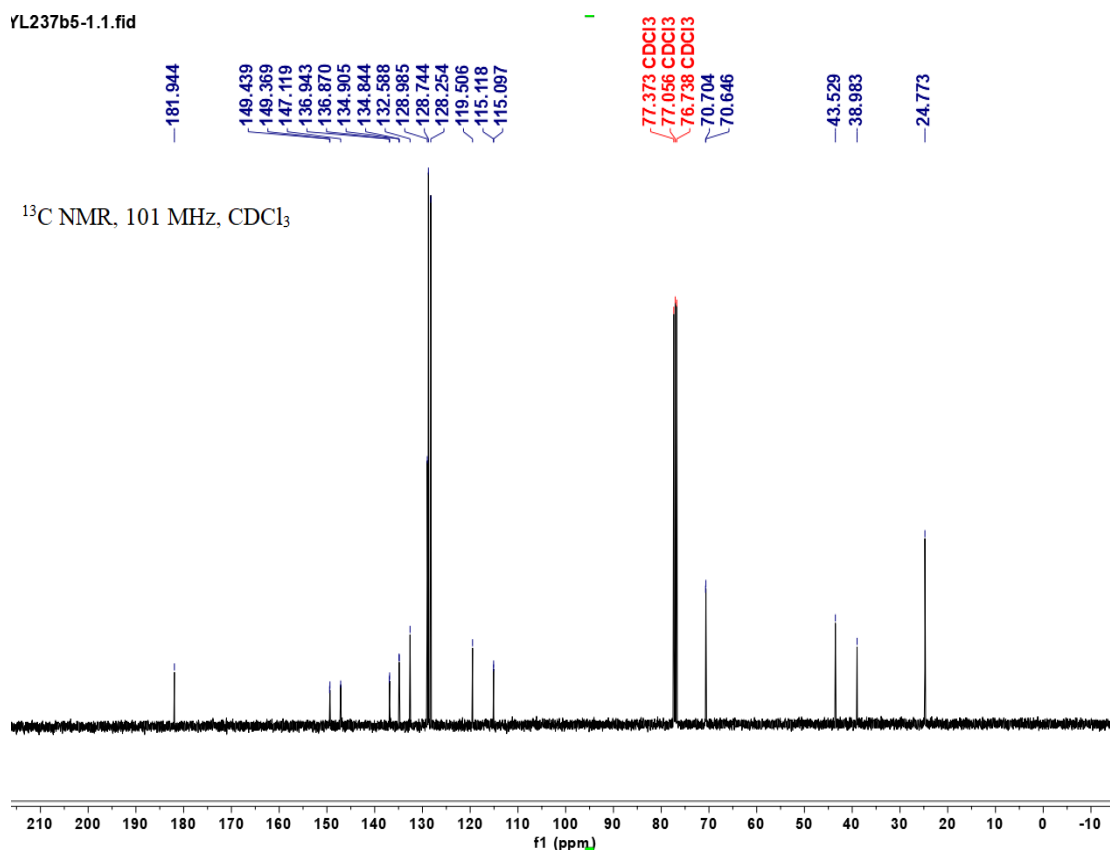

HYL237b5-1.3.fid

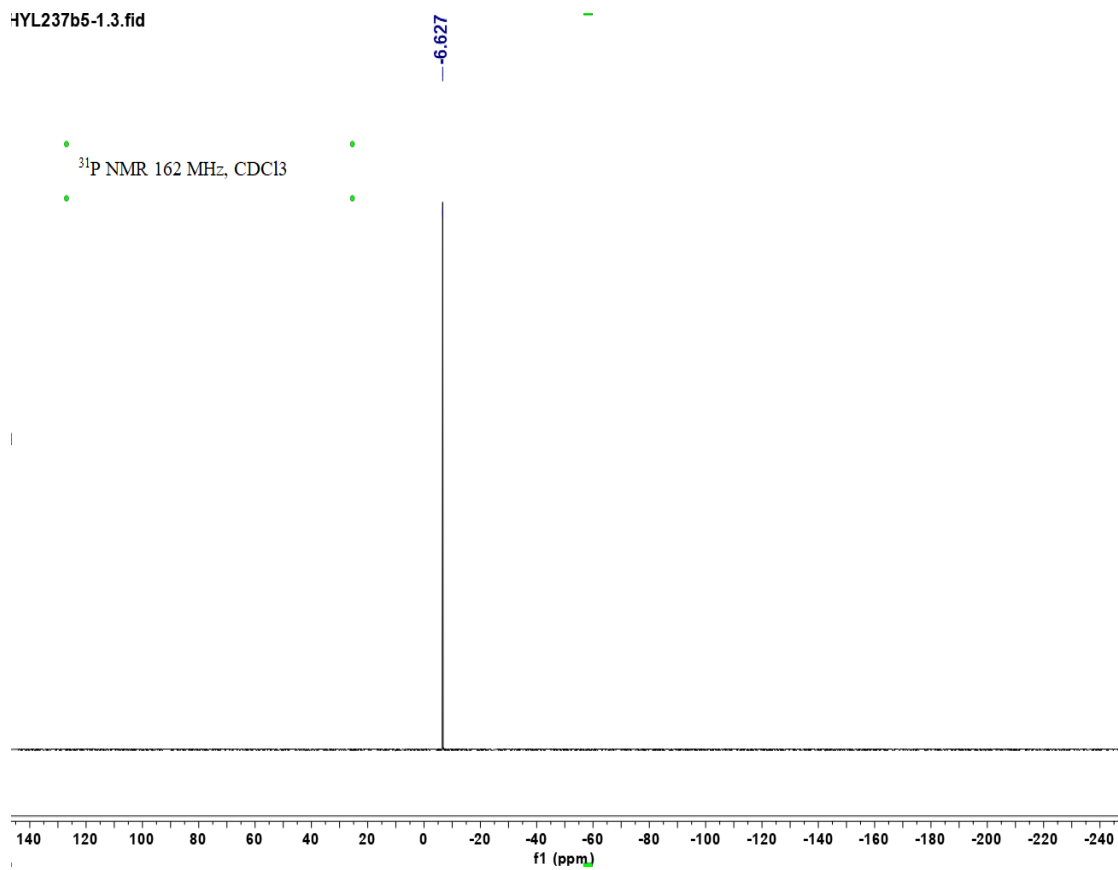

<sup>1</sup>H NMR (400 MHz), <sup>13</sup>C NMR (101 MHz) and <sup>31</sup>P NMR (162 MHz, CDCl<sub>3</sub>) spectra

of **phosphatase sensitive-11**

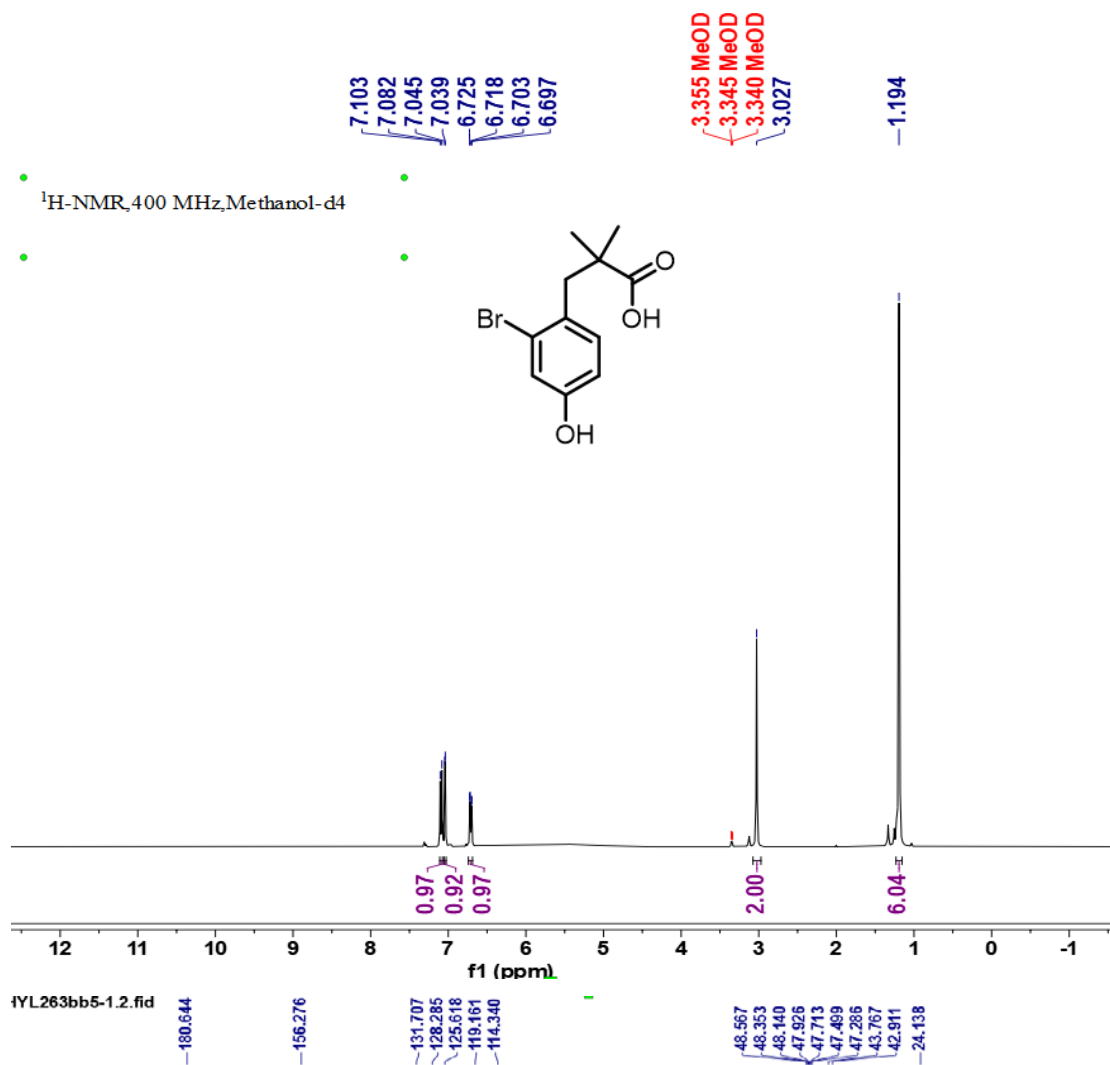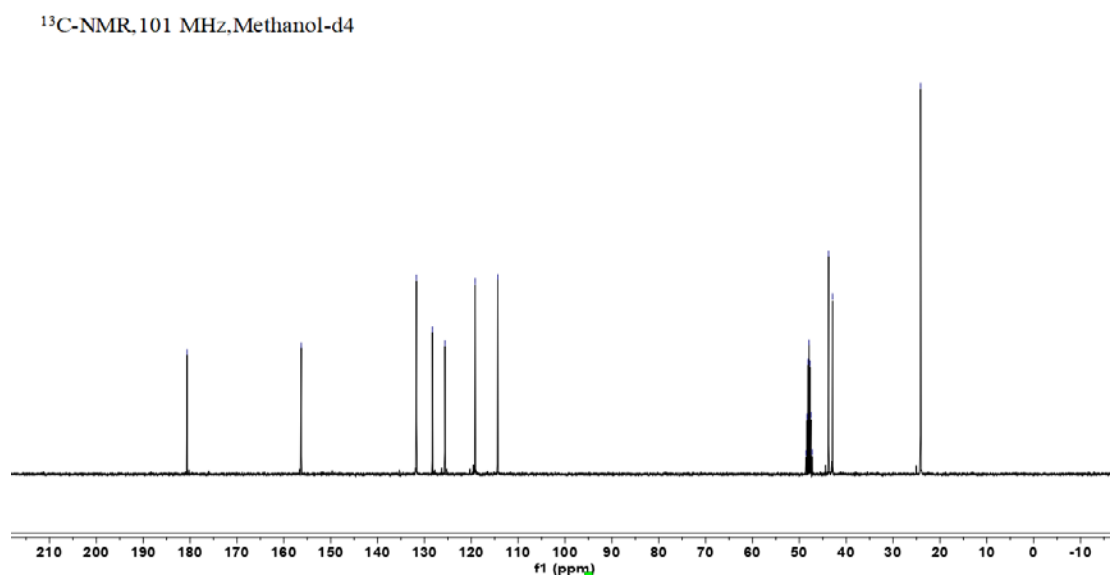

<sup>1</sup>H NMR (400 MHz) and <sup>13</sup>C NMR (101 MHz) spectra of **12**

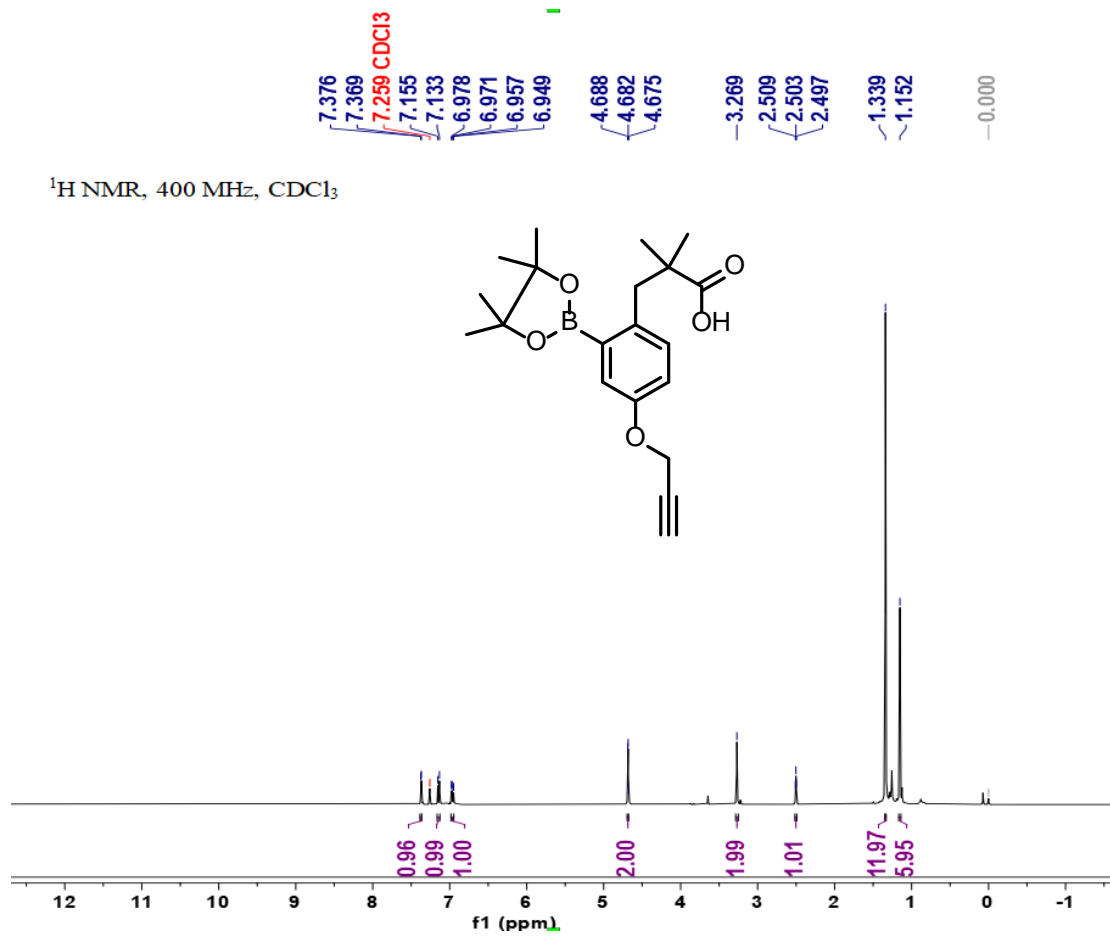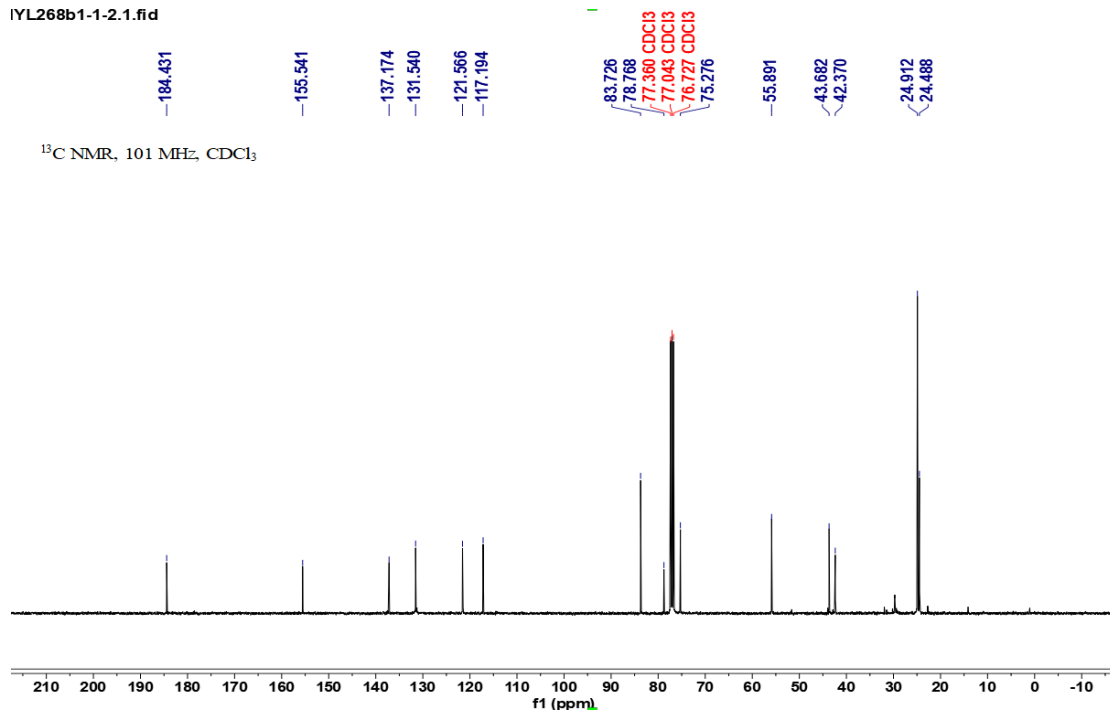

<sup>1</sup>H NMR (400 MHz) and <sup>13</sup>C NMR (101 MHz) spectra of **ROS sensitive-13**

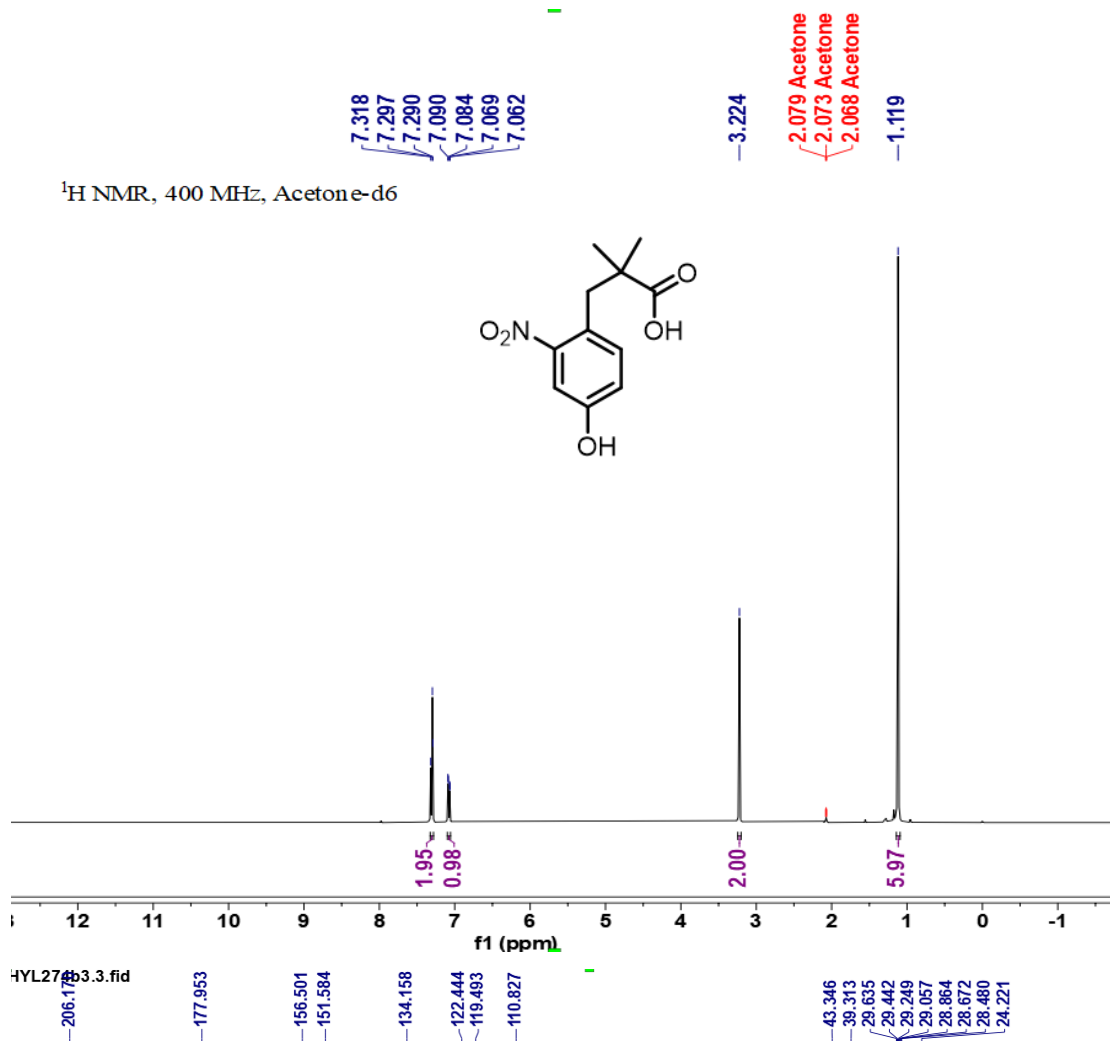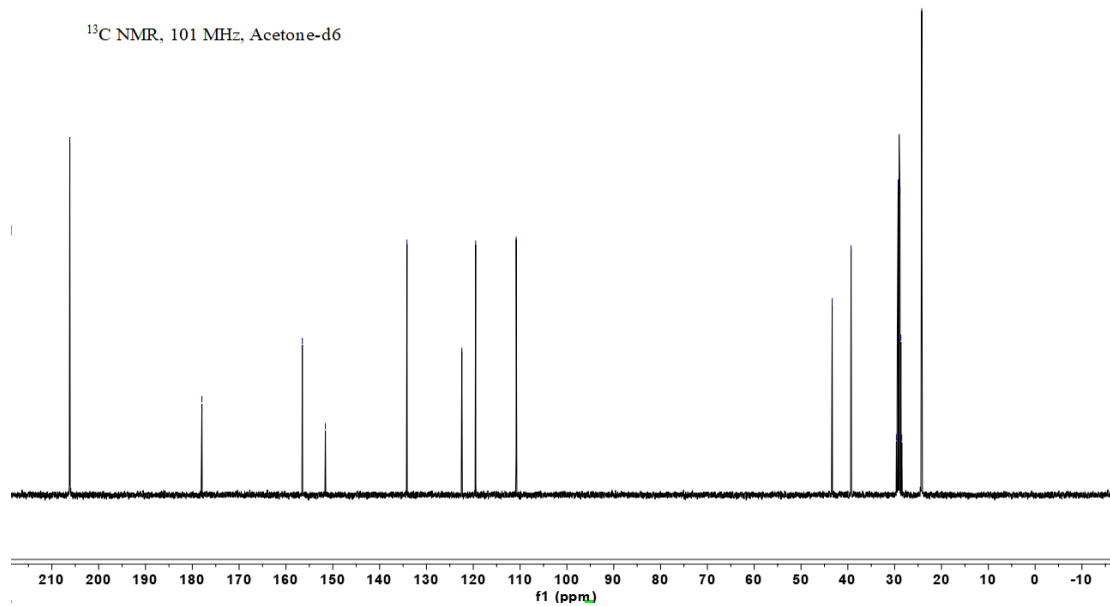

<sup>1</sup>H NMR (400 MHz) and <sup>13</sup>C NMR (101 MHz) spectra of **14**

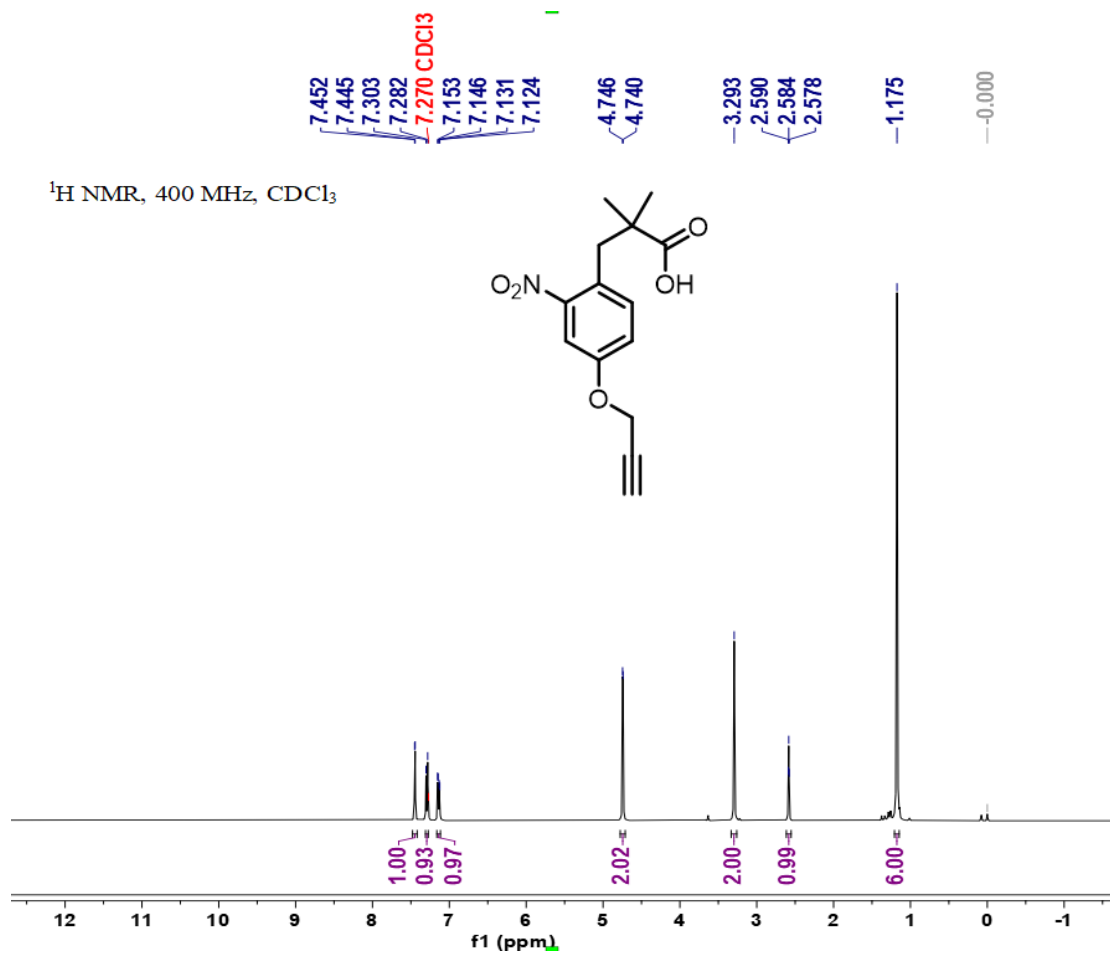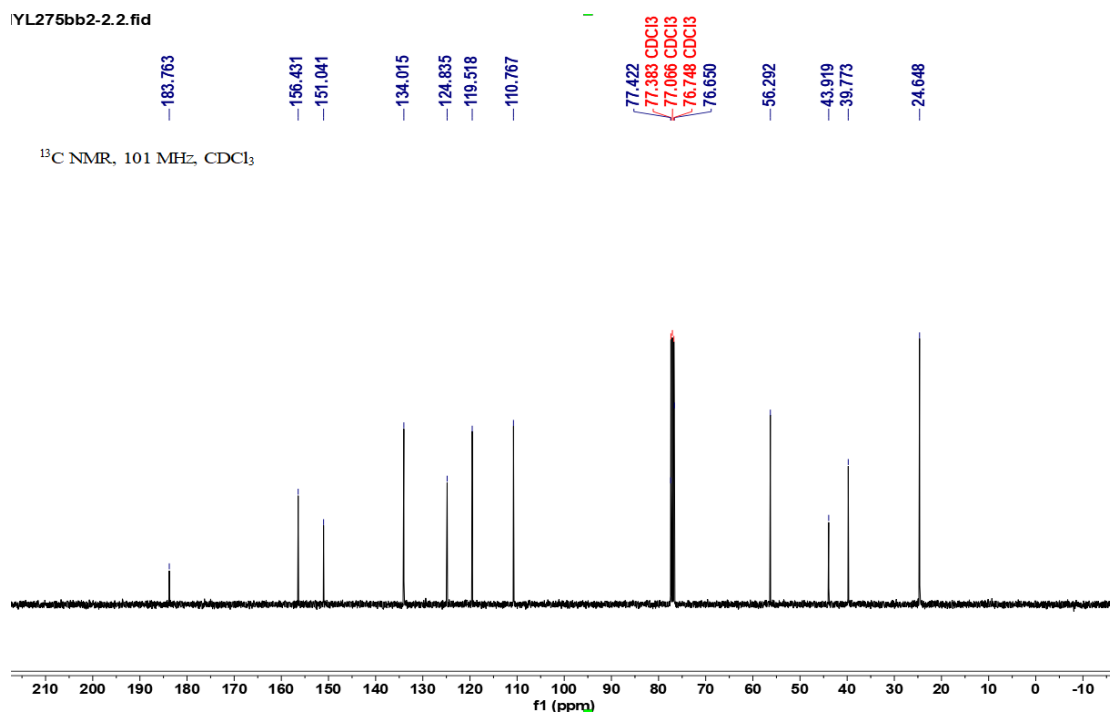

<sup>1</sup>H NMR (400 MHz) and <sup>13</sup>C NMR (101 MHz) spectra of **hypoxia sensitive-15**
